# Supplementary material for: Genome-wide methylation profiling of Beckwith-Wiedemann syndrome patients without molecular confirmation after routine diagnostics
Source: Clin Epigenetics. 2019 Mar 21;11:53. doi: 10.1186/s13148-019-0649-6 (PMC6429826; doi:10.1186/s13148-019-0649-6)
Supplement: Supplementary file 2 — Table S1. Significant hypermethylated DMPs per patient. (XLSX 3887 kb) [file 13148_2019_649_MOESM2_ESM.xlsx]

## Sheet: BWS10_hyper
row.names	regionID	Pvalue_M	AdjustedPvalue_M	Betadif	chr	pos	Genename	Index	direction	significance
cg18025136	28	1.39258e-05	0.00752406	0.201425	chr1	1050579	C1orf159	438	plus	S
cg14981312	28	1.57758e-06	0.00116942	0.0833912	chr1	1050737	C1orf159	440	plus	S
cg24884961	35	3.79563e-05	0.0167282	0.0418877	chr1	1115083	TTLL10;TTLL10;TTLL10	586	plus	S
cg19018051	90	3.73133e-05	0.016595	0.163268	chr1	1625395	LOC728661;CDK11B;CDK11B;CDK11B;CDK11B;CDK11B;CDK11B	1282	plus	S
cg00669623	94	0	0	0.343592	chr1	1655867	CDK11B;CDK11B;CDK11A;CDK11B;CDK11A;CDK11B;CDK11B;CDK11B	1289	plus	S
cg17266431	99	9.50763e-05	0.0331419	0.149273	chr1	1711069	NADK	1334	plus	S
cg15550572	135	8.87161e-05	0.0315968	0.061218	chr1	2064441	PRKCZ;PRKCZ;PRKCZ	1744	plus	S
cg24605830	174	9.42151e-05	0.0330122	0.0404391	chr1	2454221	PANK4	2422	plus	S
cg10248231	274	1.46382e-05	0.0077814	0.304268	chr1	3339870	PRDM16;PRDM16	3410	plus	S
cg01913436	274	0.00010283	0.0349112	0.267618	chr1	3340086	PRDM16;PRDM16	3411	plus	S
cg03748986	274	6.45021e-05	0.0249491	0.22535	chr1	3340187	PRDM16;PRDM16	3413	plus	S
cg00121374	278	9.6197e-05	0.0334005	0.0534158	chr1	3392638	ARHGEF16	3487	plus	S
cg02303801	278	6.66037e-05	0.0254446	0.112285	chr1	3399318		3501	plus	S
cg08425229	287	9.8339e-05	0.0338947	0.0913135	chr1	3470175	MEGF6	3576	plus	S
cg00965121	318	0.000145996	0.0439275	0.0633378	chr1	3689519	LOC388588	3901	plus	S
cg27223158	402	1.45233e-05	0.00775885	0.13507	chr1	5411760		4245	plus	S
cg13067635	406	0.000145097	0.0438111	0.217514	chr1	5526684		4250	plus	S
cg18974111	415	3.96977e-05	0.0172677	0.195739	chr1	5732348		4272	plus	S
cg05786314	506	0.000108565	0.036227	0.166547	chr1	6452096	ACOT7	4778	plus	S
cg25097074	515	1.41385e-06	0.00106276	0.0141484	chr1	6508954	ESPN	4828	plus	S
cg07718813	528	7.21393e-05	0.0270416	0.14626	chr1	6640976	ZBTB48	4964	plus	S
cg25007680	666	1.71469e-06	0.00124944	0.298764	chr1	8021821	PARK7;PARK7;PARK7	5404	plus	S
cg16411216	813	0.000164444	0.0475739	0.102363	chr1	9340507		5846	plus	S
cg16733203	1036	8.99647e-05	0.0319382	0.244684	chr1	11398011		6709	plus	S
cg00529422	1408	0.000109584	0.0363685	0.081351	chr1	16285251	ZBTB17	7907	plus	S
cg22711082	1421	1.7648e-05	0.00908046	0.330763	chr1	16396781	FAM131C	7960	plus	S
cg21853568	1423	9.35487e-05	0.0328537	0.107098	chr1	16408902		7975	plus	S
cg07319459	1522	5.49e-05	0.0221699	0.10581	chr1	17448608		8347	plus	S
cg24671886	1755	0.000123662	0.0393392	0.0550301	chr1	19756839	CAPZB	9031	plus	S
cg07813254	1841	2.50812e-06	0.0017733	0.139904	chr1	20877673	FAM43B	9340	plus	S
cg02151528	1853	7.48115e-06	0.00451457	0.0231424	chr1	20988073	DDOST	9396	plus	S
cg26303861	1853	3.84648e-12	1.03259e-08	0.026672	chr1	20988122	DDOST	9397	plus	S
cg12429444	1853	4.40096e-05	0.0186142	0.0415855	chr1	20988133	DDOST	9398	plus	S
cg14565919	1853	2.38245e-07	0.000211779	0.0162546	chr1	20988235	DDOST	9399	plus	S
cg16383081	1853	1.48262e-05	0.00785213	0.0383813	chr1	20988237	DDOST	9400	plus	S
cg04621069	1885	0.00012596	0.0397704	0.114631	chr1	21544521	ECE1;ECE1;ECE1;ECE1	9500	plus	S
cg07033286	1972	0.000162212	0.0470872	0.0364967	chr1	22432629		9793	plus	S
cg26051750	2066	0.000159799	0.0466078	0.0983872	chr1	23495997	LUZP1;LUZP1	10057	plus	S
cg08651124	2068	2.01927e-12	5.88551e-09	0.0140034	chr1	23519990	HTR1D	10072	plus	S
cg24006721	2196	9.82098e-05	0.0338947	0.00875392	chr1	25258225	RUNX3;RUNX3	10665	plus	S
cg11538920	2246	4.12178e-05	0.0177496	0.0375773	chr1	25942670	MAN1C1	10828	plus	S
cg27175380	2954	2.74521e-06	0.00191877	0.160799	chr1	35446563		13772	plus	S
cg01873305	3070	2.75379e-06	0.00192162	0.15565	chr1	36931324	MRPS15	14244	plus	S
cg16312870	3322	7.34448e-05	0.0273396	0.122638	chr1	40343411	TRIT1	15098	plus	S
cg15496430	3489	5.66936e-06	0.00357266	0.0559291	chr1	42664858	FOXJ3	15727	plus	S
cg01417692	3841	1.45804e-05	0.00776997	0.00703424	chr1	47078581	MOBKL2C;MOBKL2C	17257	plus	S
cg05965334	3841	6.89824e-05	0.0261796	0.106812	chr1	47082767	MOBKL2C	17269	plus	S
cg11573238	3889	0.000106521	0.0357469	0.186119	chr1	48002630		17507	plus	S
cg07274590	3894	0.000150589	0.044825	0.0655144	chr1	48058961		17514	plus	S
cg08258582	3894	2.76767e-06	0.00192598	0.0631932	chr1	48058985		17515	plus	S
cg02590060	4105	2.29767e-05	0.0113025	0.0339852	chr1	53685388	C1orf123	18275	plus	S
cg04871778	4267	3.66144e-06	0.00245888	0.110252	chr1	55267125	TTC22;TTC22	18782	plus	S
cg24685134	4267	5.30558e-08	5.54222e-05	0.1631	chr1	55267152	TTC22;TTC22	18783	plus	S
cg22029640	4287	0.000169314	0.0482981	0.147281	chr1	55501145		18866	plus	S
cg11832870	5190	5.86249e-05	0.0231932	0.0415583	chr1	81001617		21069	plus	S
cg06628000	6065	8.44258e-05	0.0303811	0.0877522	chr1	109756191	SARS	23626	plus	S
cg00961932	6168	5.05238e-05	0.0207151	0.117445	chr1	110691765	SLC6A17	24027	plus	S
cg14042132	6536	9.30957e-05	0.0327752	0.0561911	chr1	117112752	CD58;CD58;CD58	25274	plus	S
cg09900084	6589	4.86355e-05	0.0202057	0.152015	chr1	117935099	MAN1A2	25439	plus	S
cg03866074	6718	2.08312e-09	2.92359e-06	0.122662	chr1	144931476	PDE4DIP;PDE4DIP;PDE4DIP	25827	plus	S
cg12424475	6763	0.000135358	0.0417521	0.0457541	chr1	145548854	ANKRD35	26036	plus	S
cg15900387	6952	2.79758e-07	0.000243132	0.0829491	chr1	150738905	CTSS	26772	plus	S
cg09335321	7182	4.0092e-06	0.00264272	0.022843	chr1	153940547	CREB3L4;SLC39A1;CREB3L4	27922	plus	S
cg21685663	7202	3.81751e-05	0.0167585	0.0133562	chr1	154245266	HAX1;HAX1	28028	plus	S
cg01178854	7249	4.66254e-05	0.0195469	0.0845582	chr1	154913744		28251	plus	S
cg21787190	7301	0.000106041	0.0356624	0.00901927	chr1	155278276	FDPS;FDPS;FDPS	28687	plus	S
cg06440960	7330	1.69268e-06	0.00123796	0.208438	chr1	155828926	SYT11	28802	plus	S
cg07184316	7487	2.50193e-06	0.00177185	0.0743529	chr1	157669111	FCRL3	29632	plus	S
cg17134153	7487	0.00012205	0.0390831	0.345944	chr1	157670328	FCRL3	29634	plus	S
cg04222933	7680	1.06729e-05	0.00612987	0.281653	chr1	160783181	LY9	30304	plus	S
cg07774025	7830	1.63163e-05	0.00849929	0.0425944	chr1	162760659	HSD17B7	30869	plus	S
cg25739016	8050	1.4487e-05	0.00775717	0.220799	chr1	167638918	RCSD1	31463	plus	S
cg21167905	8259	2.2462e-07	0.000200918	0.113637	chr1	172505895	C1orf9;C1orf9	32055	plus	S
cg24720132	8304	2.54342e-06	0.0017953	0.0704736	chr1	173517966	SLC9A11	32131	plus	S
cg24412744	8487	1.21672e-05	0.00676147	0.0232978	chr1	178695291	RALGPS2	32622	plus	S
cg24307587	8675	8.34254e-07	0.000657061	0.039734	chr1	182112683		33195	plus	S
cg05302036	8693	0.000152242	0.04511	0.035915	chr1	182574609	RGS16	33261	plus	S
cg18126097	9124	0.000151195	0.0449552	0.153316	chr1	200014673	NR5A2;NR5A2	34276	plus	S
cg09032791	9173	0.00013474	0.0416494	0.114952	chr1	200815860	CAMSAP1L1	34385	plus	S
cg01966390	9601	6.294e-05	0.0245155	0.0736157	chr1	205428207		35858	plus	S
cg23633330	9751	7.59397e-09	9.29624e-06	0.236522	chr1	207510679	CD55;CD55	36356	plus	S
cg05922993	9862	4.88304e-05	0.0202337	0.0328437	chr1	209604397	LOC642587;MIR205	36619	plus	S
cg11694362	10196	1.03682e-05	0.00597887	0.0218381	chr1	216696514	ESRRG;ESRRG;ESRRG;ESRRG;ESRRG	37592	plus	S
cg02736482	10440	1.40445e-07	0.000130814	0.100831	chr1	222764068	TAF1A;TAF1A	38205	plus	S
cg01566170	10500	0.00011087	0.0366167	0.17264	chr1	223899746	CAPN2;CAPN2	38379	plus	S
cg22945457	10582	2.87277e-05	0.0135706	0.151433	chr1	225612608	LBR;LBR	38590	plus	S
cg06437922	10651	1.63888e-06	0.00121067	0.129482	chr1	226308360		38832	plus	S
cg11408656	10660	2.22656e-07	0.000199996	0.0784321	chr1	226497275	LIN9	38889	plus	S
cg08521967	10767	7.05715e-05	0.0265701	0.113231	chr1	228345490	GJC2	39384	plus	S
cg15471815	10797	9.49017e-05	0.0331419	0.0345485	chr1	228645486	HIST3H2BB;HIST3H2A	39624	plus	S
cg20704450	10798	4.50244e-05	0.0189499	0.341089	chr1	228658371		39662	plus	S
cg00815832	10798	2.7723e-05	0.0132125	0.313059	chr1	228658973		39665	plus	S
cg13475583	11197	2.18434e-05	0.0108617	0.0703151	chr1	235116731		40732	plus	S
cg17514199	11349	0.000163712	0.0474262	0.032169	chr1	238051451	LOC100130331;ZP4	41200	plus	S
cg00949801	11420	0.000134254	0.0415321	0.0388712	chr1	240776211	GREM2	41340	plus	S
cg07787634	11454	1.62145e-05	0.00847222	0.0954873	chr1	241715378	KMO	41413	plus	S
cg05400883	11556	1.74175e-05	0.00898029	0.00577687	chr1	244374397		41706	plus	S
cg26309691	11733	5.43471e-05	0.0220088	0.0202305	chr1	246887944	SCCPDH	42143	plus	S
cg26536593	11752	3.37124e-05	0.015285	0.288662	chr1	247242539	ZNF670	42222	plus	S
cg00993400	11847	6.45689e-05	0.0249491	0.0630419	chr1	249153679	ZNF692;ZNF692	42602	plus	S
cg14438812	66926	3.36602e-05	0.0152775	0.127458	chr10	574670	DIP2C	42946	plus	S
cg18474072	66943	0.000108014	0.036071	0.0699985	chr10	664762	DIP2C	43024	plus	S
cg26263145	66943	5.37077e-05	0.0218185	0.129688	chr10	666024	DIP2C	43030	plus	S
cg26597838	66963	0.000104295	0.0351858	0.640533	chr10	835615		43191	plus	S
cg04699214	66981	7.23734e-06	0.00439219	0.0256793	chr10	1011381		43240	plus	S
cg05276408	67085	1.66495e-06	0.0012257	0.00762335	chr10	1994537		43789	plus	S
cg08289056	67388	0.000156405	0.0458362	0.111248	chr10	6233666	PFKFB3	44714	plus	S
cg22783180	67495	0.00013797	0.0423757	0.0274855	chr10	8091753		45060	plus	S
cg00673251	67608	7.06774e-05	0.0265866	0.0133111	chr10	11784140	ECHDC3	45395	plus	S
cg06351596	67904	8.91526e-06	0.00526143	0.159248	chr10	17216609	TRDMT1;TRDMT1;TRDMT1	46234	plus	S
cg10790685	67910	3.49583e-07	0.000298713	0.185688	chr10	17269274	VIM	46250	plus	S
cg23821329	67910	2.68674e-14	1.38174e-10	0.141059	chr10	17269643	VIM	46251	plus	S
cg02236650	67910	6.02861e-09	7.57477e-06	0.406692	chr10	17269775	VIM	46252	plus	S
cg04349815	68026	0.000126732	0.0398209	0.0740964	chr10	21573608		46524	plus	S
cg06690686	68098	4.86685e-05	0.0202057	0.113188	chr10	23003779	PIP4K2A	46843	plus	S
cg02617791	68223	9.32555e-05	0.0328045	0.252238	chr10	27235627		47226	plus	S
cg00955290	68280	4.0529e-07	0.000339822	0.153829	chr10	28822390	WAC;WAC;WAC	47439	plus	S
cg14027385	68480	4.22329e-13	1.48319e-09	0.161784	chr10	32048204		47887	plus	S
cg06271128	68643	2.92468e-05	0.013732	0.160424	chr10	34955525	PARD3	48176	plus	S
cg20278525	68732	0.000159023	0.0465082	0.0349186	chr10	36222804		48385	plus	S
cg05372434	68768	2.90984e-07	0.000251867	0.0578362	chr10	38265937	ZNF25	48471	plus	S
cg22466043	68779	5.61264e-11	1.15061e-07	0.133406	chr10	38692145	CDC10L	48503	plus	S
cg12803321	68841	5.51128e-11	1.13526e-07	0.0260484	chr10	43839193		48750	plus	S
cg10909790	68984	5.84674e-05	0.0231522	0.186896	chr10	45925455	ALOX5	49207	plus	S
cg02790122	69579	1.22589e-05	0.00679481	0.0666852	chr10	65133532	JMJD1C;MIR1296	50730	plus	S
cg00250500	70218	2.62873e-05	0.0126266	0.0206156	chr10	77169599		52690	plus	S
cg02743070	70478	4.8788e-05	0.0202337	0.0640069	chr10	80834309	ZMIZ1	53129	plus	S
cg27599079	70622	4.9443e-05	0.0204283	0.087838	chr10	83683745	NRG3;NRG3;NRG3	53504	plus	S
cg01229798	70721	0.000121953	0.0390811	0.0138536	chr10	88126853	GRID1	53747	plus	S
cg27308707	70934	1.49545e-05	0.00790463	0.0302136	chr10	91461150	KIF20B	54376	plus	S
cg20540372	71258	0.000120688	0.0388793	0.0572788	chr10	98031961	BLNK;BLNK	55322	plus	S
cg07176677	71499	8.34878e-05	0.0301609	0.0657106	chr10	101771161	DNMBP	56193	plus	S
cg17093267	71964	0.000103843	0.0350883	0.200626	chr10	111683654	XPNPEP1;XPNPEP1;XPNPEP1	58215	plus	S
cg08314666	72121	0.000122277	0.0390973	0.153727	chr10	114551013	VTI1A	58600	plus	S
cg03716936	72700	2.04502e-09	2.90091e-06	0.441408	chr10	124908747	HMX2	60399	plus	S
cg19396666	72761	3.79889e-05	0.0167282	0.214342	chr10	125866280		60603	plus	S
cg02163937	72812	1.92774e-08	2.17356e-05	0.0112985	chr10	126432368	FAM53B	60781	plus	S
cg14731462	73004	4.43589e-05	0.0187065	0.282649	chr10	129789429	PTPRE	61307	plus	S
cg03710364	73068	7.00213e-06	0.00427365	0.0772529	chr10	130829895		61539	plus	S
cg17216758	73289	2.56066e-11	5.59761e-08	0.0120786	chr10	133834730		62594	plus	S
cg17389949	73324	1.29321e-05	0.00702261	0.0648732	chr10	134116591	STK32C	62911	plus	S
cg24055178	73342	8.65384e-07	0.000679082	0.303286	chr10	134263487		63061	plus	S
cg19137806	73355	1.2352e-05	0.00681995	0.160045	chr10	134362170	INPP5A	63142	plus	S
cg02201479	73384	0.000163996	0.0474763	0.352654	chr10	134563815	INPP5A	63396	plus	S
cg25020570	73423	6.54157e-05	0.0252005	0.206867	chr10	134943284	GPR123	64121	plus	S
cg22761205	73518	3.73511e-05	0.016595	0.197819	chr11	457256	PTDSS2	65098	plus	S
cg04726730	73689	1.62338e-06	0.00120129	0.0165956	chr11	1868700		66728	plus	S
cg13976366	73916	3.82716e-06	0.00254228	0.026172	chr11	4414916	TRIM21;TRIM21	68528	plus	S
cg05261592	74157	6.24581e-05	0.0243721	0.0943769	chr11	8215201		69373	plus	S
cg27270565	74238	4.30481e-05	0.0183524	0.0245718	chr11	9142260		69620	plus	S
cg11986577	74298	8.58433e-05	0.0307012	0.10209	chr11	10297145	SBF2	69786	plus	S
cg07698336	74642	4.76471e-09	6.07159e-06	0.0536688	chr11	15629742		70652	plus	S
cg25998175	74665	7.43254e-05	0.027544	0.0445576	chr11	15914332		70684	plus	S
cg05197551	74807	9.3159e-09	1.11805e-05	0.0856407	chr11	18340134	HPS5;HPS5;HPS5	71129	plus	S
cg16543094	74936	2.52914e-09	3.48433e-06	0.0386636	chr11	20229517		71530	plus	S
cg21678813	74936	1.04637e-08	1.24882e-05	0.38695	chr11	20229879		71531	plus	S
cg11169641	74936	6.4802e-09	8.04777e-06	0.315587	chr11	20230021		71532	plus	S
cg24427895	74936	1.30106e-06	0.000983148	0.356291	chr11	20230313		71533	plus	S
cg18261246	74936	9.88051e-10	1.52829e-06	0.288722	chr11	20230330		71534	plus	S
cg23861420	74936	1.61301e-09	2.38312e-06	0.33689	chr11	20230448		71535	plus	S
cg07136133	75485	9.75154e-05	0.0338034	0.425362	chr11	36422377	PRR5L;PRR5L;PRR5L;PRR5L	73193	plus	S
cg12915591	75604	5.35801e-06	0.00340099	0.0427273	chr11	43965360	LOC387763;LOC387763	73506	plus	S
cg01648750	75740	0.000174346	0.0493719	0.06841	chr11	45724810		73989	plus	S
cg16306508	75745	0.000167179	0.0480407	0.0346224	chr11	45792930	DKFZp779M0652	74032	plus	S
cg16317516	75886	0.000152815	0.0451859	0.256421	chr11	47294196	MADD;MADD;MADD;MADD;MADD;MADD;MADD;MADD;MADD;MADD	74602	plus	S
cg05360806	76140	0.000164769	0.0476113	0.0270555	chr11	57945730	OR9Q1	75416	plus	S
cg00673646	76251	3.07595e-05	0.0142631	0.140877	chr11	59950525	MS4A6A;MS4A6A;MS4A6A;MS4A6A;MS4A6A;MS4A6A	75796	plus	S
cg12491094	76456	5.12317e-05	0.0209252	0.0515614	chr11	62433124	C11orf48;METTL12	76706	plus	S
cg00435526	76456	4.66294e-14	2.21985e-10	0.21375	chr11	62433357	C11orf48;METTL12	76707	plus	S
cg17153794	76567	6.29395e-05	0.0245155	0.135834	chr11	63799985	MACROD1	77313	plus	S
cg23578404	76619	0.000101715	0.0346852	0.051471	chr11	64198292		77746	plus	S
cg01082111	76621	4.88669e-07	0.000404937	0.0339003	chr11	64217048		77752	plus	S
cg04145264	76765	7.40504e-05	0.0274696	0.212634	chr11	65190825	NEAT1	78493	plus	S
cg07985890	76765	3.23762e-05	0.0148839	0.442632	chr11	65190999	NEAT1	78495	plus	S
cg16884222	76765	9.19177e-05	0.0325245	0.311728	chr11	65191531	NEAT1	78496	plus	S
cg18019132	76765	7.37287e-05	0.0273976	0.192773	chr11	65191707	NEAT1	78497	plus	S
cg03695871	76801	2.01248e-05	0.0101204	0.218772	chr11	65547172	DKFZp761E198	78820	plus	S
cg11766552	76801	6.33053e-06	0.00390829	0.0753682	chr11	65547881	DKFZp761E198	78822	plus	S
cg02870584	76801	1.18585e-06	0.000905429	0.0181703	chr11	65547924	DKFZp761E198	78824	plus	S
cg12246645	76819	1.33409e-05	0.00723545	0.0994711	chr11	65679594		78986	plus	S
cg04049542	76908	1.54938e-06	0.0011505	0.328535	chr11	66532827	C11orf80	79647	plus	S
cg18553732	77034	2.55109e-07	0.000223524	0.0287777	chr11	67844184	CHKA;CHKA	80437	plus	S
cg19417588	77104	6.38802e-06	0.00393811	0.0212588	chr11	68529067	CPT1A;CPT1A	80723	plus	S
cg22779330	77166	0.000149	0.0444569	0.0754377	chr11	69061911	MYEOV;MYEOV	81000	plus	S
cg23746050	77166	0.000165092	0.0476113	0.144329	chr11	69063559	MYEOV	81001	plus	S
cg06597413	77181	1.55802e-05	0.00818066	0.167112	chr11	69251883		81027	plus	S
cg20231694	77331	9.2231e-06	0.00542693	0.170687	chr11	70691944	SHANK2	81736	plus	S
cg03482617	77355	7.4798e-07	0.00059679	0.0771837	chr11	70936781	SHANK2	81797	plus	S
cg19120782	77408	1.52731e-05	0.00802929	0.0539984	chr11	71724432	NUMA1	81995	plus	S
cg13028834	77489	0.00017107	0.0486694	0.0331422	chr11	72504617	STARD10;STARD10	82276	plus	S
cg01548965	77539	0.000113917	0.0374009	0.172401	chr11	73088618	RELT;RELT	82449	plus	S
cg00223767	77739	1.65693e-05	0.00860511	0.0699963	chr11	75831715	UVRAG	83036	plus	S
cg08561895	77745	5.59902e-09	7.05569e-06	0.00629674	chr11	75905850	WNT11	83057	plus	S
cg03213860	77852	3.56718e-05	0.0160376	0.0606275	chr11	77185670	PAK1;PAK1	83386	plus	S
cg02208793	78079	5.38056e-05	0.0218308	0.0787854	chr11	84634615	DLG2;DLG2	83938	plus	S
cg16308672	78120	3.84337e-06	0.0025491	0.0727733	chr11	85650013		84068	plus	S
cg14585907	78389	1.11742e-05	0.00630787	0.0965207	chr11	94497474		84790	plus	S
cg18372620	78646	4.20877e-05	0.0180327	0.0745765	chr11	102963125	DCUN1D5	85395	plus	S
cg11995303	78646	1.39249e-11	3.27813e-08	0.0968138	chr11	102963161	DCUN1D5	85396	plus	S
cg02999755	78646	8.93465e-05	0.0317685	0.0422943	chr11	102963244	DCUN1D5	85397	plus	S
cg00314771	78646	6.33314e-09	7.888e-06	0.0960232	chr11	102963272	DCUN1D5	85398	plus	S
cg05671385	78704	8.51573e-09	1.03949e-05	0.160143	chr11	104915759	CASP1;CASP1;CASP1;CARD16;CASP1;CASP1;CARD16	85495	plus	S
cg14994056	78788	3.72638e-07	0.000316156	0.0924805	chr11	107992015	ACAT1	85761	plus	S
cg04770025	78797	1.26348e-06	0.000956443	0.0654182	chr11	108172798	ATM;ATM	85830	plus	S
cg25037167	79195	0.000153196	0.0452505	0.148878	chr11	115943517		86943	plus	S
cg09042577	79463	1.01469e-05	0.00588296	0.0172996	chr11	119185584	MCAM	87969	plus	S
cg08458745	80142	4.02405e-05	0.0174331	0.139647	chr11	128422788	ETS1	89804	plus	S
cg19469189	80179	0.000154095	0.0454	0.0287314	chr11	128781035	KCNJ5	89974	plus	S
cg23201575	80182	5.15049e-05	0.0210168	0.055919	chr11	128809085	TP53AIP1	89984	plus	S
cg04181189	80241	1.75127e-06	0.00127177	0.123092	chr11	129817418	PRDM10;PRDM10;PRDM10;PRDM10;PRDM10;PRDM10	90144	plus	S
cg13408712	80241	3.18063e-06	0.00217693	0.149754	chr11	129817591	PRDM10;PRDM10;PRDM10;PRDM10	90145	plus	S
cg02264943	80337	4.01111e-05	0.0173946	0.109892	chr11	130785842	SNX19;SNX19	90427	plus	S
cg16630482	80503	3.7341e-08	4.00977e-05	0.0873203	chr11	133657751		90775	plus	S
cg14934141	80541	6.07014e-05	0.0237975	0.108853	chr11	134041105	NCAPD3	90943	plus	S
cg11435826	80823	7.76641e-05	0.0284407	0.155342	chr12	2792111	CACNA1C;CACNA1C;CACNA1C;CACNA1C;CACNA1C;CACNA1C;CACNA1C;CACNA1C;CACNA1C;CACNA1C;CACNA1C;CACNA1C;CACNA1C;CACNA1C;CACNA1C;CACNA1C;CACNA1C;CACNA1C;CACNA1C;CACNA1C;CACNA1C;CACNA1C;CACNA1C	91857	plus	S
cg20006729	81163	1.24002e-08	1.43594e-05	0.0544627	chr12	7033146	ATN1	93252	plus	S
cg19797739	81330	0.000127479	0.0399263	0.0636088	chr12	10102820		93845	plus	S
cg07019303	81432	0.000104762	0.0352877	0.11833	chr12	11859760	ETV6	94096	plus	S
cg14409083	81551	5.04193e-05	0.020692	0.138537	chr12	13349724	EMP1;EMP1	94437	plus	S
cg15849440	81953	2.58738e-05	0.01247	0.0539173	chr12	26111697	RASSF8;RASSF8	95441	plus	S
cg10855773	82051	7.45635e-05	0.0275882	0.0378364	chr12	27973808		95717	plus	S
cg00400102	82150	1.69376e-05	0.00876452	0.0317805	chr12	30907366	CAPRIN2;CAPRIN2;CAPRIN2;CAPRIN2;CAPRIN2;CAPRIN2	95905	plus	S
cg06077899	82255	1.5107e-11	3.53699e-08	0.261075	chr12	32832894	DNM1L;DNM1L;DNM1L	96161	plus	S
cg05971474	82301	1.16668e-05	0.00653424	0.114632	chr12	38532614		96377	plus	S
cg14851346	82301	5.2218e-07	0.000431081	0.0619865	chr12	38532713		96378	plus	S
cg07473175	82566	0.000145395	0.0438157	0.0337441	chr12	47474262	AMIGO2;AMIGO2	97081	plus	S
cg04543012	82872	4.42935e-12	1.16428e-08	0.116198	chr12	51566569	TFCP2;TFCP2	98354	plus	S
cg13008978	82872	3.53277e-07	0.000300714	0.0396153	chr12	51566772	TFCP2	98358	plus	S
cg20392585	82872	6.95404e-07	0.000559005	0.0404968	chr12	51566828	TFCP2	98359	plus	S
cg18751588	82872	2.59659e-12	7.51706e-09	0.222784	chr12	51566859	TFCP2	98360	plus	S
cg11297723	82872	8.74856e-14	3.78623e-10	0.0659842	chr12	51566914	TFCP2	98361	plus	S
cg22790973	82872	0	0	0.271884	chr12	51566990	TFCP2	98362	plus	S
cg20927059	82872	5.88655e-10	9.62645e-07	0.122403	chr12	51567112	TFCP2	98363	plus	S
cg21376733	83210	0.000109484	0.0363637	0.0227498	chr12	54891636	NCKAP1L	100077	plus	S
cg07250515	83308	2.98436e-06	0.00205441	0.0143107	chr12	56618133	OBFC2B;OBFC2B	100601	plus	S
cg05400252	83368	1.28134e-05	0.00697659	0.0569052	chr12	57394816	ZBTB39	100887	plus	S
cg18874307	83434	0.000172823	0.0491355	0.117465	chr12	58027504	B4GALNT1	101390	plus	S
cg11825675	83791	1.69336e-05	0.00876452	0.347379	chr12	67666891	CAND1	102329	plus	S
cg26873338	83888	4.24561e-05	0.0181361	0.188123	chr12	69637167	CPSF6	102545	plus	S
cg16408865	83895	8.14055e-05	0.0295564	0.173307	chr12	69753119	YEATS4	102559	plus	S
cg04257969	84030	4.19353e-12	1.11599e-08	0.194298	chr12	74932579	LOC552889;LOC552889	102926	plus	S
cg11210343	84665	0.000121536	0.0390349	0.224415	chr12	95869153	METAP2	104349	plus	S
cg21049825	84905	2.99883e-05	0.0140112	0.0951389	chr12	102248833		105015	plus	S
cg00093956	85168	9.49129e-05	0.0331419	0.0526101	chr12	107372431	MTERFD3;MTERFD3	105762	plus	S
cg09071294	85309	9.83758e-05	0.0338947	0.0245177	chr12	109531515	ALKBH2;ALKBH2;ALKBH2;ALKBH2;ALKBH2	106177	plus	S
cg04735123	85461	5.47717e-05	0.0221389	0.00327573	chr12	111358639	MYL2	106727	plus	S
cg05979433	85479	3.09348e-10	5.49967e-07	0.00894195	chr12	111664628	CUX2	106803	plus	S
cg27513787	85856	1.09327e-05	0.00622069	0.0617477	chr12	117474507		108153	plus	S
cg06296759	85887	9.83455e-05	0.0338947	0.0444508	chr12	118142003	KSR2	108275	plus	S
cg00460776	86008	3.73764e-05	0.016595	0.0246384	chr12	120731287		108711	plus	S
cg11209001	86083	8.46747e-05	0.0304212	0.0767977	chr12	121647654	P2RX4	109057	plus	S
cg27534833	86232	0.00014261	0.043489	0.0999717	chr12	123347897		109695	plus	S
cg20182983	86245	2.78677e-05	0.0132667	0.00458926	chr12	123470916	PITPNM2	109801	plus	S
cg09767076	86310	9.28736e-05	0.0327752	0.200172	chr12	124199914	ATP6V0A2	110072	plus	S
cg15997315	86327	4.60581e-05	0.0193469	0.0376511	chr12	124392362	DNAH10	110119	plus	S
cg04925956	86649	2.97023e-06	0.0020493	0.140439	chr12	129785686	TMEM132D	111130	plus	S
cg18723572	86662	3.69356e-06	0.0024727	0.0234438	chr12	130195476	TMEM132D	111156	plus	S
cg05296099	86801	9.57957e-06	0.00560714	0.0187444	chr12	131624473	GPR133	111845	plus	S
cg21167716	86919	3.32192e-11	7.04602e-08	0.0149492	chr12	132896743	GALNT9	112648	plus	S
cg24906420	86942	9.77193e-08	9.559e-05	0.291219	chr12	133133512	FBRSL1	113041	plus	S
cg19637821	86942	3.38968e-07	0.000291048	0.250159	chr12	133133572	FBRSL1	113042	plus	S
cg10448529	86977	1.99585e-05	0.0100604	0.0289609	chr12	133377652	GOLGA3	113361	plus	S
cg06022607	86980	0.000109785	0.036382	0.271176	chr12	133412002		113412	plus	S
cg18710692	87039	3.7216e-05	0.0165925	0.105419	chr13	20437712	ZMYM5;ZMYM5;ZMYM5;ZMYM5;ZMYM5;ZMYM5	113653	plus	S
cg13271643	87087	6.56754e-05	0.0252311	0.267351	chr13	21036583	CRYL1	113857	plus	S
cg11283819	87651	0.000144167	0.0437149	0.100419	chr13	30689528		115539	plus	S
cg02394989	87732	3.75037e-05	0.0166343	0.0103389	chr13	31736167	HSPH1	115737	plus	S
cg06752365	87852	1.64116e-08	1.85531e-05	0.19576	chr13	33920491		116018	plus	S
cg17486328	87854	2.94899e-08	3.20689e-05	0.106358	chr13	33930421		116025	plus	S
cg05361272	88113	2.99275e-08	3.24623e-05	0.128736	chr13	41383720	SUGT1L1;MIR621;SLC25A15	116733	plus	S
cg11650298	88276	1.84994e-05	0.00945845	0.0955077	chr13	44690989		117119	plus	S
cg09590147	88306	0.000157955	0.0462272	0.0738729	chr13	44988847		117168	plus	S
cg03135713	88425	6.67402e-05	0.0254632	0.0621258	chr13	46961897	C13orf18	117509	plus	S
cg19833103	88430	0.000126487	0.0398209	0.243732	chr13	47126551	LRCH1;LRCH1;LRCH1	117527	plus	S
cg03255417	88512	0.000124398	0.0394515	0.24321	chr13	49357650		117782	plus	S
cg02321871	88557	9.85631e-05	0.0338947	0.027442	chr13	50159138	RCBTB1	117905	plus	S
cg08389588	89551	0.000130565	0.0407439	0.0307476	chr13	98742165		120298	plus	S
cg22809871	89777	4.23165e-08	4.51014e-05	0.234961	chr13	102572229	FGF14	121006	plus	S
cg19082359	89828	4.00921e-07	0.000336818	0.31969	chr13	105791890		121172	plus	S
cg14397696	89828	7.99996e-07	0.000634746	0.219132	chr13	105792284		121173	plus	S
cg12480053	89828	2.87661e-09	3.88802e-06	0.205594	chr13	105792346		121174	plus	S
cg26791961	89856	6.92725e-05	0.0262425	0.0389624	chr13	106912494		121209	plus	S
cg00124836	90086	1.31877e-10	2.56999e-07	0.0126866	chr13	111295144	CARS2	121870	plus	S
cg01666244	90115	1.43305e-06	0.00107155	0.0268747	chr13	111567833	ANKRD10	122019	plus	S
cg06644655	90194	7.48953e-08	7.60046e-05	0.0351742	chr13	112333521		122313	plus	S
cg07343790	90299	9.93119e-07	0.000768065	0.381962	chr13	113528166	ATP11A;ATP11A	123183	plus	S
cg07770777	90299	4.81413e-05	0.0200451	0.403229	chr13	113528375	ATP11A;ATP11A	123184	plus	S
cg00555816	90306	1.79392e-09	2.60547e-06	0.177542	chr13	113584082		123255	plus	S
cg24028634	90306	1.54018e-08	1.75039e-05	0.0997513	chr13	113584107		123256	plus	S
cg16959787	90306	7.52483e-08	7.60391e-05	0.119569	chr13	113584179		123257	plus	S
cg25711375	90306	2.88804e-05	0.0136127	0.103591	chr13	113586361		123260	plus	S
cg04740679	90365	8.44861e-06	0.00500672	0.396661	chr13	114016140	GRTP1	123772	plus	S
cg14273031	90575	3.59572e-05	0.0161152	0.0382747	chr14	22320448		125160	plus	S
cg01176748	90644	0.000107962	0.036071	0.0695405	chr14	23426575	HAUS4;HAUS4;HAUS4	125418	plus	S
cg23142396	90680	4.83965e-06	0.00310416	0.0125405	chr14	23772183	PPP1R3E	125593	plus	S
cg10974463	90780	0.000126232	0.0397975	0.1625	chr14	24845722	NFATC4;NFATC4	126201	plus	S
cg00789812	91096	5.03683e-05	0.0206909	0.0884735	chr14	38077865		127242	plus	S
cg02250044	91555	6.26314e-06	0.00387786	0.139656	chr14	54976234	CGRRF1	128464	plus	S
cg06733925	92126	8.32745e-07	0.000657061	0.0145932	chr14	65746397		130105	plus	S
cg07139509	92353	0.000160794	0.0468025	0.0178399	chr14	70038717	C14orf162	130669	plus	S
cg23367119	92601	7.27134e-05	0.0271617	0.059744	chr14	74230413	C14orf43	131354	plus	S
cg13491731	92787	1.9557e-05	0.00990463	0.206911	chr14	76594783		131977	plus	S
cg22859727	93091	3.98878e-05	0.0173153	0.25121	chr14	86090320	FLRT2	132775	plus	S
cg27175447	93147	2.07496e-05	0.0103496	0.0526595	chr14	89016862	PTPN21	132913	plus	S
cg16150677	93408	2.52702e-05	0.0122203	0.0495008	chr14	92980033	RIN3	133664	plus	S
cg23193190	93578	2.26721e-05	0.0111913	0.151616	chr14	95358074		134226	plus	S
cg16398956	93862	3.49663e-06	0.00236976	0.151815	chr14	100212958		135016	plus	S
cg11887124	93982	1.13232e-05	0.00636677	0.064453	chr14	101341331	MIR665	135479	plus	S
cg10055669	94004	0.000167908	0.0481533	0.0256647	chr14	101595719		135832	plus	S
cg02811627	94161	0.000110044	0.0364084	0.0512994	chr14	103395368	AMN	136454	plus	S
cg05340482	94210	3.36409e-05	0.0152775	0.0532613	chr14	103803242	EIF5;EIF5;SNORA28	136689	plus	S
cg04998671	94228	7.38436e-10	1.17181e-06	0.00676744	chr14	104000505	TRMT61A	136759	plus	S
cg07952815	94240	6.73896e-09	8.34494e-06	0.141672	chr14	104073479		136790	plus	S
cg12944183	94240	4.24542e-07	0.000353199	0.0492442	chr14	104073931		136791	plus	S
cg14228272	94240	5.98841e-11	1.216e-07	0.110411	chr14	104074040		136792	plus	S
cg10967532	94450	1.34037e-07	0.000125941	0.375974	chr14	105830509	PACS2;PACS2	137936	plus	S
cg12425861	94450	1.63259e-05	0.00849929	0.51586	chr14	105830606	PACS2;PACS2	137937	plus	S
cg18397450	94450	8.9112e-05	0.0317115	0.585334	chr14	105830631	PACS2;PACS2	137938	plus	S
cg18182566	94459	2.37728e-07	0.000211759	0.201139	chr14	105888161	MTA1	138012	plus	S
cg19901523	94536	6.91663e-05	0.0262254	0.369785	chr14	107253273		138297	plus	S
cg23453435	94536	6.32621e-05	0.0245525	0.320688	chr14	107253290		138298	plus	S
cg07048159	94645	1.96183e-07	0.000178084	0.174471	chr15	25303336	SNORD116-4	138691	plus	S
cg13060434	94688	1.25462e-05	0.00689148	0.0554804	chr15	25954107	ATP10A	139002	plus	S
cg03857572	94729	2.23161e-05	0.0110607	0.0734799	chr15	26869641	GABRB3;GABRB3	139132	plus	S
cg03763391	95337	0.000100213	0.0343025	0.0267689	chr15	40453091	BUB1B	140811	plus	S
cg00022492	95403	3.73755e-05	0.016595	0.102591	chr15	41055530	GCHFR	141107	plus	S
cg08151731	95794	7.21374e-05	0.0270416	0.0948298	chr15	48938576	FBN1	142575	plus	S
cg11683125	95910	5.93105e-05	0.0233996	0.147343	chr15	51385476	TNFAIP8L3	142880	plus	S
cg17349461	96297	0.000170142	0.0484375	0.0279121	chr15	60632336		143969	plus	S
cg25175240	97022	1.83057e-10	3.39531e-07	0.0650674	chr15	69849786		145954	plus	S
cg22689316	97049	4.4096e-08	4.68814e-05	0.418306	chr15	70316931		145996	plus	S
cg11028209	97050	3.10871e-05	0.0143683	0.0573433	chr15	70322933		145999	plus	S
cg10177766	97106	1.51187e-05	0.00797746	0.145562	chr15	71002262	UACA	146115	plus	S
cg12354961	97170	4.88256e-06	0.003127	0.0824644	chr15	71738168	THSD4	146253	plus	S
cg19144497	97380	5.65977e-10	9.32678e-07	0.195464	chr15	74836094	ARID3B	146963	plus	S
cg22166325	97395	2.68008e-13	9.98518e-10	0.219278	chr15	74988540	EDC3;EDC3;EDC3	147009	plus	S
cg18407136	97961	3.75767e-05	0.0166494	0.212069	chr15	83681092	C15orf40;C15orf40;C15orf40;C15orf40;C15orf40;C15orf40;C15orf40	148758	plus	S
cg17140441	98369	9.64117e-06	0.00562782	0.150996	chr15	91212510		150072	plus	S
cg08939371	98388	0.000165085	0.0476113	0.141982	chr15	91473059	UNC45A	150164	plus	S
cg18724928	98388	0.000123676	0.0393392	0.103177	chr15	91473091	UNC45A	150165	plus	S
cg03940484	98405	8.11183e-06	0.00482717	0.223365	chr15	91768273	SV2B;SV2B	150270	plus	S
cg17633234	98511	0.000104425	0.0352018	0.269953	chr15	93617065	RGMA;RGMA;RGMA;RGMA;RGMA;RGMA;RGMA	150575	plus	S
cg00587665	98795	0.000168863	0.0482902	0.0872438	chr15	100533223	ADAMTS17	151437	plus	S
cg16179521	98927	0.000101753	0.0346852	0.217458	chr15	102009894	PCSK6;PCSK6;PCSK6;PCSK6;PCSK6;PCSK6;PCSK6;PCSK6	151876	plus	S
cg10805676	98996	0.000139617	0.0427283	0.0939173	chr16	421990	TMEM8A;MRPL28	152243	plus	S
cg03063946	99037	1.4357e-05	0.00770844	0.0703499	chr16	783324	NARFL	152799	plus	S
cg03178232	99058	7.22607e-07	0.000578702	0.04096	chr16	984175	LMF1	153146	plus	S
cg26917697	99080	2.66794e-05	0.012772	0.0291208	chr16	1160677		153435	plus	S
cg05090127	99093	6.79414e-08	6.94747e-05	0.22548	chr16	1350789		153707	plus	S
cg02294280	99093	4.44089e-16	3.33812e-12	0.493889	chr16	1350999		153708	plus	S
cg04970847	99093	4.89565e-07	0.000404937	0.314958	chr16	1351306		153709	plus	S
cg07000567	99109	0.000144017	0.0437003	0.14875	chr16	1479501	C16orf91	153943	plus	S
cg01007737	99255	8.03245e-05	0.0293148	0.0525804	chr16	2787413	LOC100128788;LOC100128788	155342	plus	S
cg27584315	99284	7.8996e-05	0.0288791	0.128162	chr16	2956001		155510	plus	S
cg08888410	99307	1.32051e-08	1.52092e-05	0.0069291	chr16	3139991	ZSCAN10	155722	plus	S
cg02264195	99388	1.78966e-07	0.000163147	0.0078974	chr16	3724381	TRAP1	156137	plus	S
cg26472511	99421	0.000176032	0.0497507	0.0246696	chr16	4034240	ADCY9	156282	plus	S
cg27554551	99466	2.01042e-05	0.0101204	0.137666	chr16	4421486	VASN;CORO7	156461	plus	S
cg04482884	99758	3.89543e-05	0.0170135	0.0816729	chr16	10913854	FAM18A	157373	plus	S
cg06015997	99817	0.000127016	0.0398209	0.0274431	chr16	11370372	PRM2	157537	plus	S
cg00808545	99968	3.86403e-08	4.12859e-05	0.0972671	chr16	14219324	MKL2	157896	plus	S
cg20158248	100060	6.89844e-05	0.0261796	0.191072	chr16	16042956	ABCC1;ABCC1;ABCC1;ABCC1;ABCC1	158140	plus	S
cg13032702	100158	9.61408e-05	0.0334005	0.169292	chr16	19124925	ITPRIPL2;ITPRIPL2	158323	plus	S
cg14791747	100230	0.00014542	0.0438157	0.119383	chr16	20752902	THUMPD1	158556	plus	S
cg04172166	100515	9.05143e-12	2.17873e-08	0.0122128	chr16	27052337		159335	plus	S
cg17101778	100627	6.61712e-08	6.7989e-05	0.0642107	chr16	28875557	SH2B1;SH2B1;SH2B1;SH2B1;SH2B1;SH2B1;SH2B1	159699	plus	S
cg07351059	100710	3.8907e-09	5.14504e-06	0.0108585	chr16	29999179	TAOK2;TAOK2	160086	plus	S
cg26859862	100736	2.56197e-05	0.0123614	0.00959268	chr16	30389551	SEPT1	160306	plus	S
cg01093319	100765	0.000102552	0.0348779	0.00515559	chr16	30645706		160492	plus	S
cg07444251	100765	1.24688e-05	0.00686607	0.0249073	chr16	30645901		160493	plus	S
cg06714444	100765	3.69274e-06	0.0024727	0.0477009	chr16	30646006		160494	plus	S
cg08395706	100819	5.64554e-05	0.0225641	0.0131659	chr16	31084501	ZNF646;ZNF668	160849	plus	S
cg09320731	100886	4.72417e-05	0.0197473	0.151415	chr16	32096464		161226	plus	S
cg07817886	100984	1.18764e-06	0.000905429	0.0659968	chr16	46990321	DNAJA2	161504	plus	S
cg00294267	101102	1.20323e-05	0.00671267	0.147216	chr16	49572227	ZNF423	161792	plus	S
cg02925594	101538	1.08411e-05	0.0061768	0.298353	chr16	57572900		163205	plus	S
cg00643293	101737	3.3224e-06	0.00226312	0.0291772	chr16	65739548		163761	plus	S
cg04751032	101784	5.4741e-06	0.00346442	0.104231	chr16	66443287		163837	plus	S
cg05546863	101804	4.09209e-05	0.0176742	0.0812972	chr16	66613220	CMTM2	163906	plus	S
cg16626067	101804	2.088e-09	2.92359e-06	0.0629218	chr16	66613266	CMTM2	163907	plus	S
cg09854734	101804	5.17364e-14	2.40943e-10	0.132315	chr16	66613273	CMTM2	163908	plus	S
cg06666025	101804	2.04281e-14	1.10792e-10	0.0831443	chr16	66613278	CMTM2	163909	plus	S
cg00049664	101804	3.11735e-08	3.37285e-05	0.270545	chr16	66613334	CMTM2	163910	plus	S
cg06033254	101804	0.000159355	0.0465275	0.18888	chr16	66613355	CMTM2;CMTM2	163911	plus	S
cg07921777	101850	2.61446e-05	0.0125863	0.0496536	chr16	67062970	CBFB;CBFB	164117	plus	S
cg01378158	101874	2.73765e-05	0.0130619	0.109247	chr16	67312308	PLEKHG4;PLEKHG4;PLEKHG4;PLEKHG4;PLEKHG4;PLEKHG4	164329	plus	S
cg05226168	101951	0.000165129	0.0476113	0.0368711	chr16	68118441	NFATC3;NFATC3;NFATC3;NFATC3	164770	plus	S
cg16356516	102103	1.21886e-06	0.00092758	0.0314264	chr16	70286390	AARS;EXOSC6	165304	plus	S
cg10251217	102195	6.24997e-06	0.00387531	0.0808762	chr16	71611519	TAT	165614	plus	S
cg01178772	102452	6.05007e-06	0.0037568	0.0740647	chr16	77221668		166378	plus	S
cg07918374	102701	4.74405e-05	0.0197989	0.0827234	chr16	82182319	MPHOSPH6	166979	plus	S
cg05801879	102771	3.35341e-05	0.0152525	0.0523751	chr16	84101832	MBTPS1	167188	plus	S
cg23606079	102861	0.000109816	0.036382	0.167449	chr16	84853871	CRISPLD2	167486	plus	S
cg09205083	102988	1.9324e-06	0.0013962	0.142072	chr16	85674320	KIAA0182;KIAA0182	168080	plus	S
cg06589109	102988	0.000174219	0.0493686	0.0699917	chr16	85690690	KIAA0182;KIAA0182	168111	plus	S
cg04242078	103099	6.42575e-05	0.0248929	0.137896	chr16	86527164		168466	plus	S
cg07332757	103353	2.58913e-06	0.00181857	0.234239	chr16	88593924	ZFPM1	169797	plus	S
cg10244414	103366	5.96403e-05	0.0234649	0.147222	chr16	88706717	IL17C	169879	plus	S
cg09054528	103384	1.22849e-05	0.00679536	0.107756	chr16	88821542	FAM38A	170053	plus	S
cg06821871	103400	4.79213e-05	0.0199729	0.0519436	chr16	88982220	CBFA2T3;CBFA2T3	170305	plus	S
cg01014371	103402	3.53168e-06	0.00238294	0.102402	chr16	89017958	CBFA2T3	170369	plus	S
cg08627397	103547	0.000142369	0.0434465	0.221989	chr16	89984028	MC1R	171392	plus	S
cg13477164	103605	2.27281e-05	0.011206	0.0409535	chr17	259942	C17orf97	171722	plus	S
cg20197989	103605	1.18427e-05	0.00661546	0.0587052	chr17	260058	C17orf97	171726	plus	S
cg18964590	103767	0.000103586	0.035057	0.155869	chr17	1521483	SLC43A2	172518	plus	S
cg00682090	103973	4.80923e-08	5.07523e-05	0.028311	chr17	3733468	C17orf85;C17orf85	173520	plus	S
cg15893929	103975	1.68668e-07	0.000154747	0.00984855	chr17	3755190		173529	plus	S
cg07543400	103986	7.84249e-06	0.00470611	0.135679	chr17	3824384		173580	plus	S
cg04464719	103986	6.31745e-05	0.0245525	0.111494	chr17	3824422		173581	plus	S
cg14900154	104016	3.81059e-05	0.0167504	0.175455	chr17	4074385	ANKFY1	173689	plus	S
cg13557167	104093	0.000155568	0.0456224	0.102515	chr17	4840493	SLC25A11;SLC25A11;SLC25A11	174053	plus	S
cg03027800	104296	5.63564e-05	0.0225602	0.0245843	chr17	7651017	DNAH2	175444	plus	S
cg05611351	104325	4.92315e-08	5.18268e-05	0.0614356	chr17	7919407	GUCY2D	175661	plus	S
cg13021479	104386	1.61762e-05	0.00846248	0.0103951	chr17	8380298	MYH10	176046	plus	S
cg03643423	104576	1.46331e-05	0.0077814	0.151375	chr17	11929694	MAP2K4	176662	plus	S
cg22912701	104786	4.88995e-05	0.0202428	0.0854298	chr17	16346833	NCRNA00188;NCRNA00188;NCRNA00188;NCRNA00188;C17orf76;NCRNA00188;NCRNA00188;NCRNA00188;C17orf76;NCRNA00188	177206	plus	S
cg15261887	104839	1.84753e-05	0.00945742	0.0529413	chr17	17064703	MPRIP;MPRIP	177338	plus	S
cg07391089	105247	4.38749e-05	0.0185756	0.124484	chr17	26133152		178735	plus	S
cg03238702	105248	7.90628e-06	0.004729	0.34086	chr17	26173312		178736	plus	S
cg18344513	105373	0.00014872	0.0444569	0.0579405	chr17	27493709	MYO18A;MYO18A	179338	plus	S
cg02947670	105421	0.000129667	0.0404931	0.0126175	chr17	28417565	EFCAB5	179525	plus	S
cg09492832	105653	8.06724e-05	0.0294167	0.0909202	chr17	32966466		180222	plus	S
cg01266707	106000	2.87752e-05	0.0135781	0.257525	chr17	37824461	PNMT	181702	plus	S
cg09133953	106000	4.69923e-06	0.00302769	0.153223	chr17	37824468	PNMT	181703	plus	S
cg13249593	106198	2.13375e-06	0.00152116	0.0192933	chr17	39705234		182529	plus	S
cg02096001	106213	4.6469e-05	0.0195004	0.447629	chr17	39844436	EIF1	182583	plus	S
cg17142723	106381	0.000118164	0.0383517	0.244948	chr17	41324085	NBR1;NBR1;NBR1	183532	plus	S
cg27611827	106388	0.000119297	0.0385764	0.0509724	chr17	41392569		183556	plus	S
cg09329144	106398	0.000133529	0.0413675	0.052556	chr17	41466268	LOC100130581;LOC100130581	183592	plus	S
cg04424940	106500	1.21108e-05	0.00674763	0.0252597	chr17	42264171	TMUB2;TMUB2;TMUB2;C17orf65	184004	plus	S
cg01835665	106600	0.000169048	0.0482902	0.0273666	chr17	43224550	HEXIM1	184533	plus	S
cg14360917	106793	8.10085e-05	0.029439	0.27552	chr17	45992122	SP2	185218	plus	S
cg22996004	106795	1.49324e-06	0.00111461	0.0771172	chr17	46018654	PNPO	185222	plus	S
cg20292110	106795	0	0	0.121266	chr17	46018809	PNPO	185223	plus	S
cg00177698	106795	1.54043e-10	2.93337e-07	0.217446	chr17	46018875	PNPO	185224	plus	S
cg13826447	106795	0	0	0.252512	chr17	46019006	PNPO;PNPO	185225	plus	S
cg23667362	106795	4.44089e-16	3.33812e-12	0.231425	chr17	46019017	PNPO;PNPO	185226	plus	S
cg10154655	106795	0	0	0.214774	chr17	46019165	PNPO	185227	plus	S
cg09418612	106795	2.22045e-16	1.86542e-12	0.264937	chr17	46019174	PNPO	185228	plus	S
cg24140204	106795	0	0	0.277785	chr17	46019184	PNPO	185229	plus	S
cg14634687	106893	0.000113518	0.0372987	0.280429	chr17	47094252	IGF2BP1;IGF2BP1	185965	plus	S
ch.17.1317324F	107026	5.6204e-05	0.0225602	0.0392553	chr17	48294274		186515	plus	S
cg19816930	107485	2.39979e-05	0.0117107	0.0241976	chr17	58218781		188078	plus	S
cg03631294	107675	4.99222e-05	0.020547	0.13593	chr17	62007941	CD79B;CD79B;CD79B	188782	plus	S
cg04770088	107761	9.83182e-06	0.00571574	0.0477545	chr17	63225020		189070	plus	S
cg09655520	107847	5.97918e-06	0.00372899	0.0416956	chr17	64786064	PRKCA	189234	plus	S
cg10053073	108380	3.30226e-05	0.0151162	0.134984	chr17	73623182	RECQL5	190961	plus	S
cg07251887	108384	8.08306e-05	0.0294193	0.216393	chr17	73641809	LOC100130933;RECQL5	190983	plus	S
cg20626964	108402	1.0994e-05	0.00624728	0.0816863	chr17	73753034	ITGB4;ITGB4;ITGB4	191059	plus	S
cg04180473	108442	2.99639e-06	0.0020574	0.0916589	chr17	74065190	SRP68	191288	plus	S
cg22533317	108444	0.000117332	0.0381714	0.163905	chr17	74079782	EXOC7;EXOC7;EXOC7;EXOC7;EXOC7;EXOC7	191325	plus	S
cg10640280	108556	9.34691e-05	0.0328527	0.0401027	chr17	75087108	C17orf86	191821	plus	S
cg26415789	108608	0.000136064	0.0419096	0.152185	chr17	75475973	SEPT9;SEPT9;SEPT9;SEPT9;SEPT9;SEPT9;SEPT9	192057	plus	S
cg07675682	108910	6.12503e-05	0.0239444	0.0588212	chr17	78195515	SLC26A11;SLC26A11;SLC26A11;SLC26A11;SGSH	193634	plus	S
cg21828197	109129	2.64564e-05	0.0126794	0.100607	chr17	79944587	ASPSCR1	195521	plus	S
cg04191236	109185	0.000168384	0.0481933	0.16846	chr17	80330901	UTS2R	196008	plus	S
cg24192805	109185	1.05501e-09	1.60862e-06	0.24712	chr17	80333040	UTS2R	196012	plus	S
cg13644197	109271	2.41769e-05	0.0117713	0.112855	chr17	81039820	METRNL	196899	plus	S
cg04338652	109543	0.000115834	0.0379432	0.231099	chr18	13136597		198117	plus	S
cg22550229	109543	1.58135e-07	0.000145707	0.194649	chr18	13138034		198121	plus	S
cg25890168	109603	2.07361e-05	0.0103496	0.114949	chr18	19262819	ABHD3;MIR320C1	198332	plus	S
cg20586124	109620	6.05606e-07	0.000492363	0.0374788	chr18	19998018	CTAGE1	198420	plus	S
cg13873920	110265	2.69471e-05	0.0128857	0.0185193	chr18	72163386	CNDP2	201234	plus	S
cg25786273	110332	1.20937e-07	0.000115147	0.180728	chr18	74801026	MBP;MBP	201537	plus	S
cg26957560	110457	0.000116283	0.0380105	0.0361931	chr18	77308241		202082	plus	S
cg10565187	110697	9.19281e-05	0.0325245	0.0310563	chr19	1468943	APC2	203787	plus	S
cg01335597	110757	2.29017e-08	2.5355e-05	0.0582035	chr19	1944192	CSNK1G2	204277	plus	S
cg15179454	110800	0.00015463	0.0454715	0.158696	chr19	2274042		204596	plus	S
cg16705446	110993	6.52581e-06	0.00401151	0.0305826	chr19	3751546	APBA3	205654	plus	S
cg11566895	111073	1.10425e-06	0.000847892	0.076235	chr19	4472531	HDGF2;HDGF2	206182	plus	S
cg12107643	111162	1.25924e-05	0.00689845	0.0230871	chr19	5231603	PTPRS;PTPRS;PTPRS;PTPRS	206640	plus	S
cg26360644	111203	6.91658e-08	7.03908e-05	0.00681032	chr19	5824300	NRTN	206912	plus	S
cg05380558	111214	8.43531e-05	0.0303811	0.141331	chr19	5905215	VMAC;NDUFA11	206975	plus	S
cg24391122	111376	0.000126608	0.0398209	0.0556453	chr19	7986137	SNAPC2;SNAPC2	207855	plus	S
cg23179379	111472	6.24042e-05	0.0243721	0.17036	chr19	9434523	ZNF559	208281	plus	S
cg23490822	111557	3.31523e-05	0.0151538	0.123772	chr19	10434247	RAVER1	208758	plus	S
cg00586551	111649	7.91375e-06	0.004729	0.0927232	chr19	11347513	LOC55908;DOCK6	209297	plus	S
cg00341204	111668	7.91259e-05	0.0289019	0.0240348	chr19	11520483	RGL3;RGL3	209414	plus	S
cg02744880	111675	1.70114e-09	2.48758e-06	0.481057	chr19	11592200	ELAVL3;ELAVL3	209480	plus	S
cg01602621	111684	1.52567e-05	0.00802929	0.0315833	chr19	11689813	ACP5;ACP5;ACP5;ACP5	209562	plus	S
cg03302259	111684	8.40863e-06	0.00498993	0.0829585	chr19	11689855	ACP5;ACP5;ACP5;ACP5	209563	plus	S
cg00779243	111715	5.36926e-05	0.0218185	0.0500354	chr19	12146829	ZNF433	209712	plus	S
cg02776664	111805	0.000142753	0.0435016	0.0384413	chr19	12978624	MAST1	210232	plus	S
cg06537894	111805	7.71514e-05	0.0283256	0.0373177	chr19	12978706	MAST1	210233	plus	S
cg22693863	111891	2.85997e-05	0.01354	0.135941	chr19	14118191	RFX1	210791	plus	S
cg19282782	111892	0.000122677	0.0391123	0.0271811	chr19	14141098	IL27RA;RLN3	210800	plus	S
cg17765751	111966	0.000166217	0.0478608	0.045894	chr19	15217993	SYDE1	211181	plus	S
cg07583490	111988	9.12953e-05	0.032354	0.0814577	chr19	15375374	BRD4;BRD4	211308	plus	S
cg17850597	112033	9.52027e-05	0.0331419	0.0250668	chr19	15917833	OR10H1;OR10H1	211511	plus	S
cg22333846	112157	9.99713e-05	0.0342686	0.170286	chr19	17580131	SLC27A1	212134	plus	S
cg03192619	112189	2.07456e-08	2.32078e-05	0.0750389	chr19	17829972	MAP1S	212277	plus	S
cg22609459	112784	4.3625e-06	0.00283633	0.105387	chr19	36126295	RBM42	215126	plus	S
cg15197135	113284	2.49401e-06	0.00176916	0.0173353	chr19	42437416		217712	plus	S
cg26655255	113310	2.85617e-10	5.12026e-07	0.0226894	chr19	42700705		217831	plus	S
cg17029690	113376	0.000121766	0.0390505	0.0102801	chr19	44009073	PHLDB3	218171	plus	S
cg18226166	113558	5.83816e-05	0.0231396	0.0461701	chr19	45996901	RTN2;RTN2;RTN2	219126	plus	S
cg17499826	113587	4.17518e-05	0.0179247	0.0908444	chr19	46284986	DMPK;DMPK;DMPK;DMPK	219347	plus	S
cg15114651	113671	6.07633e-05	0.0237975	0.138395	chr19	47289410	SLC1A5;SLC1A5;SLC1A5	219808	plus	S
cg12451679	113688	0.000118135	0.0383517	0.104103	chr19	47617189	ZC3H4	219910	plus	S
cg10262032	113829	0.000106901	0.035839	0.234188	chr19	49078119	SULT2B1;SULT2B1	220548	plus	S
cg09341448	113837	0.000133823	0.0414286	0.273092	chr19	49164383	SEC1	220631	plus	S
cg14040796	113856	0.000154267	0.0454	0.0767768	chr19	49403969	NUCB1	220814	plus	S
cg26353468	113986	4.75175e-14	2.23727e-10	0.20864	chr19	50553682	FLJ26850	221632	plus	S
cg21634218	113986	1.53961e-06	0.00114523	0.234765	chr19	50553699	FLJ26850	221633	plus	S
cg26257814	113986	2.05984e-06	0.00147584	0.285988	chr19	50553708	FLJ26850	221634	plus	S
cg07655045	113986	1.60005e-09	2.37215e-06	0.211706	chr19	50553883	FLJ26850	221635	plus	S
cg27397787	113986	2.64411e-12	7.60325e-09	0.627223	chr19	50553907	FLJ26850	221636	plus	S
cg16349876	113986	2.11831e-13	8.25092e-10	0.280493	chr19	50554013	FLJ26850	221637	plus	S
cg20971220	113986	2.22045e-16	1.86542e-12	0.0519148	chr19	50554067	FLJ26850	221638	plus	S
cg26715571	113986	2.41804e-11	5.36801e-08	0.137892	chr19	50554280	FLJ26850	221639	plus	S
cg22531183	113986	0	0	0.517073	chr19	50554451	FLJ26850	221640	plus	S
cg18756179	113986	2.14015e-11	4.82612e-08	0.254804	chr19	50554510	FLJ26850	221641	plus	S
cg10152131	114037	1.03624e-07	0.000100449	0.160471	chr19	51111677		221892	plus	S
cg08998501	114172	4.83339e-05	0.0201058	0.0901123	chr19	52511778	ZNF615	222554	plus	S
cg04522821	114291	3.43144e-05	0.0154923	0.360057	chr19	54041329	ZNF331;ZNF331	222990	plus	S
cg21102121	114332	0.000169806	0.048374	0.223176	chr19	54401295	PRKCG	223206	plus	S
cg04632683	114350	8.44517e-05	0.0303811	0.018243	chr19	54620122	PRPF31;TFPT	223341	plus	S
cg20719132	114478	5.03106e-05	0.020687	0.0129875	chr19	56028425	SSC5D	224072	plus	S
cg12224388	11898	0.000144885	0.0437924	0.144783	chr2	545599		225820	plus	S
cg14174583	11952	0.00010578	0.0356025	0.120747	chr2	1051469	SNTG2	226049	plus	S
cg15796818	12004	8.68195e-08	8.61073e-05	0.0108185	chr2	1647197	PXDN	226260	plus	S
cg18105675	12159	4.12199e-05	0.0177496	0.242612	chr2	3642400	COLEC11;COLEC11	226990	plus	S
cg10945539	12159	6.32644e-05	0.0245525	0.153194	chr2	3642447	COLEC11;COLEC11	226991	plus	S
cg19867917	12159	3.70667e-06	0.0024776	0.544731	chr2	3642629	COLEC11;COLEC11	226992	plus	S
cg09974661	12159	3.52213e-06	0.00238025	0.488555	chr2	3642634	COLEC11;COLEC11	226993	plus	S
cg17872886	12159	5.30597e-07	0.000436348	0.577705	chr2	3642732	COLEC11;COLEC11;COLEC11;COLEC11	226995	plus	S
cg16430428	12159	0.000108867	0.0362712	0.23388	chr2	3642847	COLEC11;COLEC11	226996	plus	S
cg26615126	12159	4.34077e-05	0.0184324	0.173057	chr2	3642867	COLEC11;COLEC11	226997	plus	S
cg27472937	12165	3.92309e-05	0.017082	0.169093	chr2	3683119	COLEC11;COLEC11	227026	plus	S
cg16442452	12300	4.18723e-05	0.0179584	0.0278372	chr2	7739760		227408	plus	S
cg11674763	12363	0.000161606	0.0469431	0.149347	chr2	8833332		227574	plus	S
cg07891369	12384	9.95211e-05	0.034167	0.0391024	chr2	9149959		227629	plus	S
cg05172956	12398	9.08152e-08	8.9449e-05	0.1125	chr2	9283270		227651	plus	S
cg01011898	12398	2.01363e-06	0.00144514	0.293696	chr2	9283292		227652	plus	S
cg15513446	12568	0.000116306	0.0380105	0.0260455	chr2	10956969		228158	plus	S
cg02290451	12595	3.80492e-06	0.00253143	0.00641084	chr2	11295919	PQLC3	228259	plus	S
cg10018519	12664	7.16532e-05	0.0269064	0.151314	chr2	11970078		228458	plus	S
cg23046918	13125	9.7081e-05	0.0336801	0.115231	chr2	24717757		229628	plus	S
cg17029156	13281	9.56093e-10	1.48961e-06	0.265094	chr2	27070458	DPYSL5	230208	plus	S
cg14840351	13476	2.98428e-13	1.10227e-09	0.121368	chr2	29537776	ALK	230962	plus	S
cg08735990	13614	0.000166817	0.0480011	0.0118283	chr2	32853229	TTC27;TTC27	231306	plus	S
cg01617117	13753	2.12977e-10	3.89962e-07	0.17405	chr2	37384381	EIF2AK2;EIF2AK2	231575	plus	S
cg14126601	13753	4.74576e-05	0.0197989	0.371195	chr2	37384708	EIF2AK2;EIF2AK2	231578	plus	S
cg00724403	13806	4.0584e-06	0.00267104	0.0592571	chr2	38009031		231703	plus	S
cg03158570	14194	1.22322e-08	1.42417e-05	0.0585549	chr2	45182910		232765	plus	S
cg11222440	14361	0.000144907	0.0437924	0.0295321	chr2	47192276	TTC7A	233143	plus	S
cg14669921	14571	0.000163415	0.0473723	0.214119	chr2	54015318	LOC100302652;ERLEC1;ASB3;ASB3;ERLEC1;ERLEC1	233593	plus	S
cg10929758	14620	5.61424e-05	0.0225602	0.081313	chr2	54857270	SPTBN1;SPTBN1	233737	plus	S
cg11555420	14807	4.35036e-06	0.00283273	0.0654946	chr2	60804996		234225	plus	S
cg02414555	15697	1.28311e-05	0.00697659	0.0438986	chr2	79216742		237176	plus	S
cg03568859	16164	1.66977e-05	0.00866131	0.141241	chr2	97405048	LMAN2L;LMAN2L;LMAN2L;LMAN2L;LMAN2L;LMAN2L	238691	plus	S
cg17206872	16263	0.000112868	0.0371136	0.073243	chr2	99134857	INPP4A;INPP4A;INPP4A;INPP4A	239083	plus	S
cg08022315	16436	0.000148028	0.044321	0.00372212	chr2	101767882	TBC1D8	239507	plus	S
cg00420922	16436	2.70894e-14	1.38174e-10	0.203479	chr2	101767891	TBC1D8	239508	plus	S
cg07510423	16682	0.000167507	0.0481029	0.0390304	chr2	106681998	C2orf40	240168	plus	S
cg08185075	17121	0.000167722	0.0481322	0.112527	chr2	119231686		241337	plus	S
cg26366087	17280	9.49447e-05	0.0331419	0.0531902	chr2	121574902	GLI2	241924	plus	S
cg04075184	17335	9.85679e-05	0.0338947	0.107243	chr2	122290763	CLASP1;CLASP1;CLASP1	242063	plus	S
cg03940153	17621	1.0472e-05	0.00603062	0.0456368	chr2	130940427	SMPD4;SMPD4;SMPD4;SMPD4;SMPD4;SMPD4;FAM128B;SMPD4	242854	plus	S
cg01293971	17683	7.21197e-06	0.00438559	0.0823111	chr2	132061016		243108	plus	S
cg26890182	17868	2.92586e-05	0.013732	0.147898	chr2	135621176	ACMSD	243483	plus	S
cg23851026	17892	1.52301e-05	0.00802636	0.198281	chr2	136556271	LCT	243553	plus	S
cg20242066	17895	4.48979e-06	0.00291466	0.298848	chr2	136595261	LCT	243562	plus	S
cg04750100	17895	0.00010265	0.0348779	0.340371	chr2	136595281	LCT	243563	plus	S
cg03716672	18009	4.98762e-05	0.020547	0.0410349	chr2	143465045		243798	plus	S
cg05318210	18114	0.000137158	0.0421564	0.175073	chr2	145780010		243978	plus	S
cg05360774	18298	6.62739e-05	0.025369	0.194686	chr2	151838548		244302	plus	S
cg04064028	18917	0.000143229	0.0435848	0.143981	chr2	170335723	BBS5	245739	plus	S
cg01201151	19893	0.000126702	0.0398209	0.0485451	chr2	198573107	MARS2;MARS2	248793	plus	S
cg24914185	19929	0.000143716	0.043671	0.323152	chr2	200663789		248933	plus	S
cg20019410	20341	3.35132e-12	9.26382e-09	0.125588	chr2	207939050		249973	plus	S
cg25516881	20484	3.77597e-05	0.0167132	0.0969312	chr2	211069400	ACADL	250344	plus	S
cg09040552	20585	0.000159992	0.0466322	0.0842613	chr2	216298121	FN1;FN1;FN1;FN1;FN1;FN1;FN1	250565	plus	S
cg13810556	20657	7.14239e-06	0.00435306	0.0828038	chr2	217363253	RPL37A	250738	plus	S
cg08189615	20816	1.82128e-05	0.00933418	0.0776889	chr2	219157119	PNKD;TMBIM1	251096	plus	S
cg12267125	21150	1.44321e-07	0.000134133	0.0711103	chr2	225772093	DOCK10	252483	plus	S
cg08813545	21256	4.97292e-05	0.020507	0.126725	chr2	228681090	CCL20;CCL20	252706	plus	S
cg00106250	21401	3.33067e-14	1.65935e-10	0.231346	chr2	232329963	NCL	253132	plus	S
cg27406823	21667	1.70985e-07	0.000156538	0.253154	chr2	236164597		254057	plus	S
cg27659903	21694	3.76528e-06	0.00251004	0.187486	chr2	236514471	AGAP1;AGAP1	254141	plus	S
cg13613991	21806	4.2266e-07	0.000352318	0.119811	chr2	237997238	COPS8;COPS8	254562	plus	S
cg21395812	21927	2.92616e-05	0.013732	0.192333	chr2	239008679	ESPNL	254889	plus	S
cg03811905	21938	9.23369e-06	0.00542693	0.076371	chr2	239070208		254958	plus	S
cg06624310	21990	0.000124243	0.0394372	0.0700644	chr2	239628974		255152	plus	S
cg09975562	22038	7.74769e-05	0.0283965	0.0161843	chr2	240119034	HDAC4	255447	plus	S
cg11012584	22282	0.00012217	0.0390924	0.0340692	chr2	242549943	THAP4;THAP4	256635	plus	S
cg18997875	22300	6.75718e-05	0.0257576	0.0353435	chr2	242673654	D2HGDH	256767	plus	S
cg12163823	22300	1.59395e-08	1.80671e-05	0.125854	chr2	242673721	D2HGDH	256768	plus	S
cg16744973	114818	6.39387e-05	0.0247918	0.233734	chr20	738228		257354	plus	S
cg09774842	114941	7.43797e-05	0.027544	0.0464487	chr20	3052483	OXT	257947	plus	S
cg17295666	114949	0.000148516	0.044436	0.262488	chr20	3140861	UBOX5;FASTKD5;UBOX5	257992	plus	S
cg20905902	114982	3.00424e-05	0.0140112	0.0233882	chr20	3748417	C20orf27;C20orf27	258203	plus	S
cg13222091	114984	7.85136e-07	0.000624112	0.147086	chr20	3758207	SPEF1	258214	plus	S
cg12889133	115411	0.000117328	0.0381714	0.0863269	chr20	30200497		260226	plus	S
cg20217978	115438	6.0747e-05	0.0237975	0.143948	chr20	30608297	C20orf160	260392	plus	S
cg11800794	115482	9.3031e-05	0.0327752	0.0970369	chr20	31407338	MAPRE1	260579	plus	S
cg03634947	115582	7.50367e-08	7.60046e-05	0.0272326	chr20	33547679		261034	plus	S
cg07474022	115714	9.71114e-07	0.000752405	0.179149	chr20	35974912	SRC;SRC	261632	plus	S
cg07064544	115875	2.22051e-07	0.000199872	0.0081022	chr20	43029994	HNF4A;HNF4A;HNF4A;HNF4A;HNF4A;HNF4A;HNF4A;HNF4A;HNF4A	262506	plus	S
cg14595562	116106	0.000176278	0.0497873	0.0306259	chr20	48732649	UBE2V1;UBE2V1;TMEM189-UBE2V1;UBE2V1	263707	plus	S
cg19226099	116207	9.99769e-05	0.0342686	0.153434	chr20	54824085	MC3R	264118	plus	S
cg00845204	116252	1.07672e-07	0.000103437	0.0154727	chr20	55964273		264336	plus	S
cg06534819	116520	0.000151777	0.0450552	0.0310351	chr20	61669583	NCRNA00029	265825	plus	S
cg14355134	116526	9.9418e-05	0.034159	0.089896	chr20	61704021		265849	plus	S
cg10341719	116699	2.24182e-07	0.000200918	0.0636553	chr21	17565263	C21orf34;C21orf34	266880	plus	S
cg00551647	116747	5.71254e-05	0.022747	0.355948	chr21	27943730	CYYR1	267059	plus	S
cg08829149	116801	9.52977e-05	0.0331419	0.0375859	chr21	31964845	KRTAP6-3	267270	plus	S
cg05187003	116884	2.42378e-08	2.65933e-05	0.260053	chr21	34641507	IL10RB	267625	plus	S
cg23056155	116895	0.000131258	0.0408829	0.0335637	chr21	34855566		267664	plus	S
cg25385366	117189	8.63311e-05	0.0308499	0.276905	chr21	43809360	TMPRSS3;TMPRSS3;TMPRSS3	268934	plus	S
cg18656873	117189	3.16483e-05	0.014612	0.149771	chr21	43809519	TMPRSS3;TMPRSS3;TMPRSS3	268935	plus	S
cg03234839	117390	0.00012693	0.0398209	0.130807	chr21	46408037		269895	plus	S
cg07296260	117390	8.19067e-05	0.0296147	0.17595	chr21	46408093		269896	plus	S
cg08742575	117501	2.03836e-05	0.0102265	0.684092	chr21	47604166	C21orf56;C21orf56	270388	plus	S
cg12016809	117501	2.79302e-05	0.0132818	0.721537	chr21	47604291	C21orf56;C21orf56;C21orf56;C21orf56	270389	plus	S
cg13732083	117501	3.79686e-05	0.0167282	0.750998	chr21	47605072	C21orf56;C21orf56	270392	plus	S
cg20568147	117526	1.52491e-08	1.73766e-05	0.0823336	chr21	47914614	DIP2A;DIP2A;DIP2A;DIP2A;DIP2A;DIP2A;DIP2A	270526	plus	S
cg01388022	117593	0.000133527	0.0413675	0.0313004	chr22	18229010	BID;BID;BID	270775	plus	S
cg15006864	117597	0.000146475	0.0440242	0.1294	chr22	18265049		270794	plus	S
cg20336580	117646	0.000174045	0.0493519	0.00486351	chr22	19166301	SLC25A1	271029	plus	S
cg25990314	117682	3.62638e-05	0.0162186	0.0118336	chr22	19841927	GNB1L;C22orf29	271245	plus	S
cg18045395	117707	0.000117098	0.0381572	0.0960379	chr22	20103778	TRMT2A;TRMT2A;RANBP1	271386	plus	S
cg24492374	117883	3.62418e-06	0.00244151	0.158146	chr22	24093423	ZNF70	272060	plus	S
cg14095048	117968	6.56625e-05	0.0252311	0.0902441	chr22	25342876		272403	plus	S
cg01746044	118117	1.22916e-05	0.00679536	0.0610102	chr22	30234775	ASCC2	273051	plus	S
cg17599586	118223	2.81019e-05	0.0133368	0.0248234	chr22	32026779	PISD	273533	plus	S
cg19750606	118253	6.46357e-05	0.0249491	0.148904	chr22	32854329	BPIL2	273681	plus	S
cg20439022	118473	0.000136614	0.0420193	0.151911	chr22	38478787	SLC16A8	274580	plus	S
cg10211626	118684	0.000129353	0.0404244	0.119824	chr22	42085361	C22orf46;NHP2L1	275665	plus	S
cg06972695	118848	0.000101759	0.0346852	0.190274	chr22	45097596	PRR5;PRR5-ARHGAP8;PRR5;PRR5;PRR5;PRR5	276421	plus	S
cg24558188	118917	0.000107783	0.0360503	0.0829207	chr22	46432835		276744	plus	S
cg04787750	118970	3.84751e-05	0.0168557	0.0523982	chr22	47023209	GRAMD4	277046	plus	S
cg10477088	119085	0.000122525	0.0391123	0.0286407	chr22	50118821		277439	plus	S
cg05329888	119161	0.000159415	0.0465275	0.0191621	chr22	50968312	TYMP;TYMP;TYMP	278039	plus	S
cg19437142	119163	1.39051e-06	0.00104705	0.0247539	chr22	51001651	C22orf41	278084	plus	S
cg17943757	22703	9.60575e-06	0.00561479	0.00779097	chr3	10417161	ATP2B2;ATP2B2	279271	plus	S
cg24847846	22836	0.000124261	0.0394372	0.383806	chr3	12595473		279690	plus	S
cg05467012	22836	0.000121432	0.0390308	0.433885	chr3	12595696		279691	plus	S
cg19730887	23032	7.30678e-05	0.0272466	0.0802202	chr3	15085146	NR2C2	280353	plus	S
ch.3.17169629F	23166	6.14008e-09	7.69226e-06	0.293263	chr3	17194625		280692	plus	S
cg23091302	23214	6.63156e-05	0.025369	0.317748	chr3	19389409	KCNH8	280790	plus	S
cg27235072	23230	0.000159339	0.0465275	0.0193194	chr3	20049601	C3orf48	280822	plus	S
cg04074353	23530	0.000111887	0.0368194	0.0833333	chr3	30933751	GADL1	281524	plus	S
cg02784956	23673	5.31836e-05	0.0216605	0.0266547	chr3	33619441	CLASP2	281902	plus	S
cg18677812	23841	0.000104094	0.0351455	0.0230159	chr3	38936985	SCN11A	282415	plus	S
cg00576886	23860	8.47691e-05	0.0304212	0.107361	chr3	39221962		282483	plus	S
cg21185355	23958	2.18523e-05	0.0108617	0.0562656	chr3	41975014	ULK4	282771	plus	S
cg17621718	23986	5.63263e-05	0.0225602	0.241681	chr3	42306737	CCK	282857	plus	S
cg23983435	23986	0.000122689	0.0391123	0.0714072	chr3	42306852	CCK	282858	plus	S
cg11142705	23986	5.89999e-05	0.0232985	0.0926752	chr3	42306974	CCK	282859	plus	S
cg17683948	24212	2.92322e-05	0.013732	0.0975294	chr3	45429800	LARS2	283602	plus	S
cg14784617	24382	5.67173e-05	0.0226476	0.026807	chr3	47517624	SCAP	284184	plus	S
cg13052625	24400	0.00015542	0.0456102	0.240147	chr3	47865946	DHX30;DHX30	284264	plus	S
cg06049972	24460	1.10498e-08	1.30783e-05	0.219519	chr3	48646375	UQCRC1	284525	plus	S
cg27278382	24460	0	0	0.439381	chr3	48646722	UQCRC1	284526	plus	S
cg10784414	24460	5.59552e-14	2.57789e-10	0.193259	chr3	48647031	UQCRC1	284528	plus	S
cg03365548	24576	0.000166946	0.0480061	0.0656119	chr3	50176163		285257	plus	S
cg14448864	24595	3.28641e-10	5.79458e-07	0.11126	chr3	50336673	HYAL3;NAT6;NAT6;HYAL3	285424	plus	S
cg11095658	24656	1.16216e-05	0.00651749	0.0812243	chr3	51616517	RAD54L2	285796	plus	S
cg02577651	24677	1.09284e-08	1.29705e-05	0.0233928	chr3	51976427	PARP3;RRP9;PARP3;PARP3;PARP3	285886	plus	S
cg08161720	24703	0.000109214	0.0363303	0.0219102	chr3	52188073	WDR51A;WDR51A;WDR51A	286003	plus	S
cg21154426	24789	6.03387e-06	0.00375362	0.109328	chr3	53161967	RFT1	286405	plus	S
cg10882522	24987	6.6632e-05	0.0254446	0.219461	chr3	57199792	IL17RD	286927	plus	S
cg25610960	25055	5.98134e-08	6.1902e-05	0.0660976	chr3	58316308		287153	plus	S
cg03319184	25133	0.000111513	0.0367584	0.0660581	chr3	60388836	FHIT;FHIT	287301	plus	S
cg00071984	25138	8.88457e-09	1.0723e-05	0.0134985	chr3	60617504	FHIT;FHIT	287306	plus	S
cg15958828	25656	2.30967e-05	0.011346	0.111958	chr3	71598380	FOXP1;FOXP1	288379	plus	S
cg03202213	25923	5.35228e-06	0.00340099	0.0750184	chr3	85006115		288873	plus	S
cg04383352	25979	0.000144927	0.0437924	0.110412	chr3	88188026	ZNF654	289004	plus	S
cg26149645	26200	2.32792e-05	0.011412	0.079801	chr3	100529346	ABI3BP	289535	plus	S
cg15541583	26514	0.000172983	0.0491483	0.220393	chr3	112013063	SLC9A10;SLC9A10	290273	plus	S
cg21589273	26605	5.55293e-05	0.0223608	0.0905243	chr3	113416452	KIAA2018	290502	plus	S
cg21526120	26622	3.79101e-05	0.0167282	0.0575019	chr3	113679982	ZDHHC23	290551	plus	S
cg19918429	26953	9.43082e-05	0.0330122	0.02763	chr3	122399781	PARP14	291437	plus	S
cg12235788	27038	4.54753e-05	0.0191209	0.307318	chr3	123476518	MYLK;MYLK;MYLK;MYLK	291653	plus	S
cg24928100	27154	0	0	0.325289	chr3	125094316	ZNF148	291898	plus	S
cg00436219	27243	1.95905e-06	0.00141308	0.0995392	chr3	126397072		292205	plus	S
cg26797238	27303	2.35748e-05	0.0115174	0.0593395	chr3	127323818	MCM2	292415	plus	S
cg02503763	27329	1.10655e-05	0.00627128	0.257384	chr3	127542386	MGLL;MGLL	292479	plus	S
cg02116612	27329	2.05984e-05	0.0103102	0.262243	chr3	127542388	MGLL;MGLL	292480	plus	S
cg11318906	27457	3.55271e-15	2.34182e-11	0.397496	chr3	129035019	H1FX;H1FX;C3orf47	293001	plus	S
cg19999212	27550	2.63674e-05	0.0126509	0.0852409	chr3	131096964		293305	plus	S
cg10256790	27659	0.000103548	0.035057	0.173194	chr3	133618896		293606	plus	S
cg24033859	28453	0.000144933	0.0437924	0.110559	chr3	154796701	MME;MME;MME;MME	295993	plus	S
cg10141352	28494	3.40968e-07	0.00029218	0.0530778	chr3	155859344	KCNAB1;KCNAB1	296124	plus	S
cg01296532	28563	1.4747e-10	2.83338e-07	0.141721	chr3	157217187	VEPH1;VEPH1;VEPH1;VEPH1;VEPH1;VEPH1	296318	plus	S
cg14106308	28563	3.63968e-09	4.828e-06	0.0971227	chr3	157217286	VEPH1;VEPH1;VEPH1;VEPH1;VEPH1;VEPH1	296319	plus	S
cg25777557	28636	1.00879e-06	0.00077878	0.0122412	chr3	159706538	IL12A	296548	plus	S
cg01441497	28767	4.9632e-05	0.0204866	0.0304731	chr3	167968476	C3orf50	296928	plus	S
cg25790298	28987	7.46758e-05	0.0276011	0.0573514	chr3	172031063	FNDC3B;FNDC3B	297471	plus	S
cg09660211	29176	4.38295e-05	0.0185747	0.0216347	chr3	178120021		297782	plus	S
cg06375534	29379	0	0	0.316797	chr3	183353366	KLHL24	298385	plus	S
cg26314281	29493	1.45021e-05	0.00775717	0.0685561	chr3	184529337	VPS8;VPS8	298912	plus	S
cg25487529	29578	5.63931e-05	0.0225602	0.0604983	chr3	186080243	DGKG;DGKG;DGKG	299157	plus	S
cg21746409	29807	4.91844e-05	0.0203411	0.0623691	chr3	190056237		299701	plus	S
cg05040232	29986	1.06968e-05	0.00613533	0.114724	chr3	194117403	GP5	300172	plus	S
cg14112754	29986	0.000150653	0.044825	0.16756	chr3	194118613	GP5	300177	plus	S
cg13185177	29986	0.000173657	0.0492989	0.250875	chr3	194119885	GP5	300181	plus	S
cg08451797	30160	1.34621e-05	0.0072919	0.0451165	chr3	196163167		300778	plus	S
cg26048523	30230	8.48362e-08	8.47286e-05	0.0613193	chr3	197183416		301030	plus	S
cg23719207	30230	0.00016828	0.0481933	0.00651294	chr3	197183481		301031	plus	S
cg25221442	30230	7.367e-12	1.81404e-08	0.0222304	chr3	197183582		301032	plus	S
cg11302533	30230	4.72625e-09	6.04475e-06	0.0263629	chr3	197183662		301033	plus	S
cg22554448	30320	0.000141405	0.0431829	0.00697281	chr4	668354	ATP5I	301474	plus	S
cg05741730	30346	0.000135453	0.0417521	0.0995519	chr4	851385	GAK	301730	plus	S
cg00704873	30347	7.29248e-06	0.00441939	0.0290063	chr4	868858	GAK	301773	plus	S
cg00497472	30349	0.000143081	0.0435708	0.100809	chr4	892861	GAK	301819	plus	S
cg01638225	30382	1.06838e-08	1.27154e-05	0.014849	chr4	1202930	LOC100130872;LOC100130872-SPON2	302221	plus	S
cg21082272	30382	6.97784e-05	0.0263423	0.00542125	chr4	1202966	LOC100130872;LOC100130872-SPON2	302222	plus	S
cg06593565	30382	7.64583e-05	0.0281193	0.0438891	chr4	1245287	C4orf42;C4orf42	302331	plus	S
cg17118391	30417	6.79282e-05	0.0258704	0.030595	chr4	1583898		302715	plus	S
cg09920549	30486	0.000117111	0.0381572	0.00700081	chr4	2264324	MXD4	303178	plus	S
cg27217742	30596	7.21623e-06	0.00438559	0.242955	chr4	3365280	RGS12;RGS12	303717	plus	S
cg16616971	30661	0.000107314	0.0359215	0.0932092	chr4	3876783		304154	plus	S
cg17384436	30764	0.000134828	0.0416494	0.045407	chr4	5624405	EVC2;EVC2	304522	plus	S
cg14706428	30801	3.03085e-06	0.00207774	0.163001	chr4	6113389	JAKMIP1;JAKMIP1	304658	plus	S
cg22328396	30801	1.39606e-05	0.0075334	0.449663	chr4	6116698	JAKMIP1;JAKMIP1	304663	plus	S
cg22111705	31056	0.000100587	0.0343952	0.0817455	chr4	8430496	ACOX3;ACOX3	305719	plus	S
cg03290977	31261	0	0	0.366022	chr4	15402686	C1QTNF7;C1QTNF7	306326	plus	S
cg13291296	31450	0.000147733	0.0442788	0.023913	chr4	22390126	GPR125	306798	plus	S
cg19481816	31667	7.31998e-05	0.0272721	0.0608539	chr4	26585351	TBC1D19	307262	plus	S
cg04301614	31766	1.27422e-05	0.00695473	0.192196	chr4	37585993	C4orf19;C4orf19;C4orf19	307480	plus	S
cg19398783	31833	0.000108758	0.0362632	0.0322294	chr4	38784578	TLR10;TLR10;TLR10;TLR10	307636	plus	S
cg18909973	32063	3.25365e-05	0.0149416	0.0439858	chr4	46996057	GABRA4	308450	plus	S
cg17841452	32100	0.000122686	0.0391123	0.0488102	chr4	48137219	TXK	308576	plus	S
cg00277233	32214	4.22598e-05	0.0180884	0.0967795	chr4	54229634	SCFD2	308905	plus	S
cg02196651	32233	2.56873e-06	0.00181018	0.0507603	chr4	54457842	LNX1	308959	plus	S
cg09357438	32385	5.95385e-07	0.000484974	0.0891511	chr4	57688282	SPINK2	309448	plus	S
cg13074458	32408	0.00012018	0.0387449	0.050403	chr4	57985198		309530	plus	S
cg14236118	32555	5.49884e-07	0.00045048	0.350269	chr4	70697558		309804	plus	S
cg27417997	32807	0.000116169	0.0380105	0.311414	chr4	77356416	SHROOM3;SHROOM3	310495	plus	S
cg05951609	32807	1.36406e-05	0.00737928	0.266047	chr4	77356507	SHROOM3;SHROOM3	310496	plus	S
cg07207937	32887	1.7074e-06	0.00124625	0.255811	chr4	78783799	MRPL1	310683	plus	S
cg04249586	33822	5.77438e-05	0.0229718	0.0176857	chr4	111119946	ELOVL6;ELOVL6	313233	plus	S
cg08310176	33826	0.00015248	0.0451182	0.0213146	chr4	111398146	ENPEP	313250	plus	S
cg03916421	34349	5.7984e-05	0.0230033	0.129891	chr4	130013461	SCLT1;C4orf33	314628	plus	S
cg14389169	34349	0.000148836	0.0444569	0.0793924	chr4	130016074	SCLT1;C4orf33;C4orf33	314646	plus	S
cg26269613	34627	9.26466e-05	0.0327246	0.0378318	chr4	142558451	IL15;IL15	315320	plus	S
cg24936781	34642	0.000165038	0.0476113	0.0277282	chr4	143191281	INPP4B;INPP4B	315335	plus	S
cg13435229	34727	0.000121027	0.0389301	0.144464	chr4	146653819	C4orf51	315580	plus	S
cg20430909	35155	0.000136159	0.0419096	0.115812	chr4	158917335		316734	plus	S
cg23596401	35260	2.93328e-05	0.0137503	0.0130717	chr4	164415586	C4orf43	316986	plus	S
cg24024036	35394	0.000149587	0.0446007	0.0590468	chr4	170101082	SH3RF1	317349	plus	S
cg21437561	35938	0.0001579	0.0462272	0.0371804	chr4	187026872		318995	plus	S
cg08123100	35951	0.000132404	0.0411378	0.0797541	chr4	187148430	KLKB1	319042	plus	S
cg12298321	36162	2.04571e-05	0.0102514	0.0384288	chr5	91988		319599	plus	S
cg08714121	36199	0.000153244	0.0452505	0.0129215	chr5	374093	AHRR	319787	plus	S
cg23091057	36250	6.10266e-05	0.0238787	0.11023	chr5	851225	ZDHHC11	320205	plus	S
cg08994336	36296	9.98385e-06	0.00579626	0.00688419	chr5	1279526	TERT;TERT	320792	plus	S
cg13995918	36296	1.10756e-12	3.4638e-09	0.0146514	chr5	1280305	TERT;TERT	320794	plus	S
cg05573381	36346	0.000162894	0.0472532	0.198809	chr5	1653258		321157	plus	S
cg15671317	36365	6.99525e-05	0.0263602	0.327712	chr5	1828098		321322	plus	S
cg19050152	36365	3.41989e-05	0.0154564	0.183282	chr5	1828311		321323	plus	S
cg07567767	36562	6.44757e-07	0.000523201	0.02419	chr5	5239990	ADAMTS16	322211	plus	S
cg00143606	36801	2.43722e-07	0.000215753	0.0476916	chr5	10759383	DAP	322827	plus	S
cg16278604	36826	3.50107e-06	0.00236976	0.0965009	chr5	11512237	CTNND2	322874	plus	S
cg23138250	37295	5.68623e-05	0.0226844	0.112753	chr5	33401870		323873	plus	S
cg14676666	37786	2.35805e-07	0.000210483	0.116842	chr5	52699653		325365	plus	S
cg25470419	37798	8.91436e-07	0.000696973	0.0967455	chr5	52907653	NDUFS4	325405	plus	S
cg00416206	37858	4.3192e-05	0.0183772	0.0455835	chr5	54015681		325502	plus	S
cg26610868	37964	3.99621e-06	0.00263821	0.0914941	chr5	55752262		325805	plus	S
cg05507305	38000	0.000103713	0.0350721	0.0165312	chr5	56208718	C5orf35	325880	plus	S
cg05188868	38605	0.000138814	0.042513	0.0147302	chr5	73937330	ENC1	327414	plus	S
cg05606089	38749	2.07892e-07	0.000187917	0.0797028	chr5	77306302	AP3B1	327944	plus	S
cg02318282	38992	6.60427e-05	0.0253098	0.0715745	chr5	82789386	VCAN;VCAN;VCAN;VCAN	328545	plus	S
cg12630606	39167	8.79839e-09	1.06791e-05	0.204804	chr5	90679528	LOC100129716;ARRDC3	329035	plus	S
cg26981201	39167	0.000138622	0.042513	0.152965	chr5	90679533	LOC100129716;ARRDC3	329036	plus	S
cg02339078	39167	1.12873e-05	0.00635493	0.0327928	chr5	90679543	LOC100129716;ARRDC3	329037	plus	S
cg00308841	39169	7.6874e-05	0.028248	0.148777	chr5	90790737		329040	plus	S
cg14587401	39267	6.79789e-07	0.000549547	0.313128	chr5	94890408	ARSK;TTC37	329321	plus	S
cg00849368	39267	4.22143e-09	5.53119e-06	0.337222	chr5	94890411	ARSK;TTC37	329322	plus	S
cg12324598	39307	6.57305e-05	0.0252311	0.0180454	chr5	95244262	ELL2	329426	plus	S
cg26325912	39402	8.7285e-06	0.00516544	0.129912	chr5	97315689		329633	plus	S
cg18151987	39607	2.45382e-05	0.0119201	0.102404	chr5	108083631	FER;FER	330042	plus	S
cg00239952	39703	7.21766e-09	8.88634e-06	0.222989	chr5	111754478	EPB41L4A;FLJ11235	330314	plus	S
cg12855547	39762	2.5041e-07	0.000220761	0.181068	chr5	112824700	MCC	330491	plus	S
cg19733633	39762	1.15172e-05	0.00646737	0.2172	chr5	112824746	MCC	330492	plus	S
cg22173752	39827	7.49888e-05	0.0276533	0.00668075	chr5	114937919	TMED7-TICAM2;TICAM2;TICAM2;TMED7-TICAM2	330682	plus	S
cg21054194	40158	1.76526e-07	0.000161266	0.087378	chr5	124749655		331422	plus	S
cg00407867	40283	2.57468e-06	0.00181139	0.0914873	chr5	127640424	FBN2	331703	plus	S
cg04504441	40483	5.63712e-05	0.0225602	0.0189824	chr5	132948217	FSTL4;FSTL4	332364	plus	S
cg04520047	40734	0.000138332	0.0424563	0.0286066	chr5	137606606	GFRA3	333283	plus	S
cg19667623	41471	8.87802e-08	8.78485e-05	0.0229906	chr5	149380025	HMGXB3;TIGD6	336051	plus	S
cg18764008	41630	4.2441e-05	0.0181361	0.12984	chr5	151101114		336586	plus	S
cg07452312	41711	6.7586e-07	0.000547403	0.42132	chr5	153775466	GALNT10	336762	plus	S
cg21636911	41768	6.61243e-06	0.00405893	0.124974	chr5	155000366		336987	plus	S
cg25093583	41934	8.80555e-05	0.0314138	0.0236795	chr5	158758502	IL12B	337394	plus	S
cg21546155	42007	1.07209e-05	0.00613562	0.0393985	chr5	159894937		337585	plus	S
cg19836145	42129	0.000147105	0.0441548	0.0554567	chr5	166998728	ODZ2	337856	plus	S
cg17505642	42186	2.90616e-06	0.00200832	0.115409	chr5	167916639	RARS	337967	plus	S
cg13277254	42351	1.81664e-05	0.00932155	0.148124	chr5	171333801	FBXW11;FBXW11;FBXW11	338441	plus	S
cg07419740	42461	8.48474e-05	0.0304212	0.0808871	chr5	172410441	ATP6V0E1	338787	plus	S
cg03983713	42491	2.02396e-05	0.0101662	0.0131631	chr5	172744704	STC2	338943	plus	S
cg11097675	42645	4.52956e-06	0.00292717	0.127427	chr5	175612438		339384	plus	S
cg05548190	42717	1.45702e-05	0.00776997	0.410757	chr5	176432570	UIMC1	339731	plus	S
cg04981574	42719	0.000125639	0.0397101	0.0971505	chr5	176449406	ZNF346	339742	plus	S
cg07265015	42770	6.57783e-05	0.0252311	0.14341	chr5	176938522	DOK3;DOK3	340068	plus	S
cg05482050	42796	1.5712e-07	0.000145084	0.592658	chr5	177409334		340170	plus	S
cg16245345	43059	9.85698e-05	0.0338947	0.16642	chr5	179922339	CNOT6	341191	plus	S
cg02148751	43501	2.22475e-05	0.0110453	0.0605704	chr6	4672226		342864	plus	S
cg25117895	43531	3.98155e-07	0.000335151	0.0911276	chr6	5003999	RPP40	342938	plus	S
cg16323298	43807	1.99089e-05	0.0100472	0.197007	chr6	11044974	ELOVL2	343898	plus	S
cg19931206	43814	5.31642e-08	5.54222e-05	0.0842066	chr6	11138650	LOC221710	343923	plus	S
cg11874760	44010	0.000109001	0.0362875	0.0196875	chr6	14118415	CD83;CD83	344348	plus	S
cg00412851	44122	2.81082e-05	0.0133368	0.15589	chr6	15463343	JARID2	344521	plus	S
cg21725624	44279	3.98463e-05	0.0173148	0.0581386	chr6	17988677	KIF13A;KIF13A;KIF13A;KIF13A	344896	plus	S
cg14989642	44664	2.60492e-07	0.00022731	0.123407	chr6	26224013	HIST1H3E	345953	plus	S
cg14543412	44664	2.0515e-09	2.90091e-06	0.0772743	chr6	26224100	HIST1H3E	345955	plus	S
cg24440941	44664	3.86301e-05	0.0169063	0.0777711	chr6	26224668	HIST1H3E	345957	plus	S
cg25329933	44971	4.56968e-06	0.00294865	0.114975	chr6	29636669	MOG;MOG;MOG;MOG;MOG;MOG;MOG;MOG;MOG;MOG;MOG	348320	plus	S
cg24703717	44974	8.86142e-09	1.0723e-05	0.12943	chr6	29691168	HLA-F;HLA-F;HLA-F;HLA-F;HLA-F;HLA-F	348366	plus	S
cg05603292	44974	1.62565e-07	0.000149468	0.0567485	chr6	29691631	HLA-F;HLA-F;HLA-F	348371	plus	S
cg27201802	45011	1.7107e-05	0.00884148	0.0914686	chr6	30138225	TRIM15	349293	plus	S
cg03860665	45033	7.41047e-06	0.00448455	0.0268033	chr6	30524763	PRR3;PRR3;PRR3;GNL1;PRR3;GNL1	350017	plus	S
cg04862321	45041	0.000110826	0.0366167	0.172374	chr6	30580928	PPP1R10	350129	plus	S
cg09804616	45049	3.19125e-05	0.0147066	0.14772	chr6	30644832	KIAA1949;KIAA1949	350369	plus	S
cg05545351	45092	3.28451e-05	0.015051	0.177265	chr6	31082835	PSORS1C1	351153	plus	S
cg15498513	45097	4.0661e-05	0.0175797	0.0392446	chr6	31129680	TCF19;TCF19	351297	plus	S
cg25343331	45130	5.08287e-05	0.0207961	0.066015	chr6	31602739	BAT2	352032	plus	S
cg24234938	45147	3.90188e-05	0.0170243	0.0243494	chr6	31790106		352959	plus	S
cg19860840	45149	0.000173743	0.0492989	0.0771103	chr6	31798138		352985	plus	S
cg07743144	45152	1.98215e-05	0.010023	0.0530603	chr6	31855706	EHMT2;EHMT2	353268	plus	S
cg20724257	45192	5.45697e-05	0.0220781	0.183872	chr6	32407784	HLA-DRA	355008	plus	S
cg00575744	45225	0.000120814	0.0388907	0.168784	chr6	32908642	HLA-DMB;HLA-DMB	355605	plus	S
cg13906813	45235	0.000147164	0.0441548	0.294998	chr6	33040914	HLA-DPA1	355922	plus	S
cg09261794	45240	0.000102638	0.0348779	0.0732715	chr6	33147897	COL11A2;COL11A2;COL11A2	356196	plus	S
cg06140670	45240	2.4537e-05	0.0119201	0.0290016	chr6	33177792	RING1	356469	plus	S
cg06818415	45254	8.27834e-06	0.00491943	0.0286558	chr6	33379267	PHF1;PHF1;PHF1	357384	plus	S
cg20687992	45258	0.000153748	0.045368	0.0200833	chr6	33419790	SYNGAP1	357583	plus	S
cg20637405	45951	4.09679e-05	0.0176767	0.00734819	chr6	42046377	TAF8	359895	plus	S
cg15787744	46167	9.52739e-05	0.0331419	0.118084	chr6	44234175	NFKBIE	360796	plus	S
cg11570484	46445	9.42024e-06	0.00552142	0.0374931	chr6	52104784	IL17F	361570	plus	S
cg02067022	46896	7.72379e-05	0.0283331	0.0866606	chr6	73795396	KCNQ5;KCNQ5;KCNQ5;KCNQ5;KCNQ5	362662	plus	S
cg11523221	47372	9.25034e-07	0.000719689	0.0816854	chr6	90905332	BACH2;BACH2	364101	plus	S
cg07437546	47386	3.48919e-05	0.0157199	0.11788	chr6	91096062		364136	plus	S
cg06539434	47581	2.23571e-05	0.0110607	0.117605	chr6	101120796	ASCC3	364804	plus	S
cg01477319	47740	1.69104e-06	0.00123796	0.0965102	chr6	107531017	PDSS2	365224	plus	S
cg03164070	47768	9.83111e-05	0.0338947	0.0248731	chr6	107987436		365288	plus	S
cg06150925	47799	1.22492e-05	0.00679481	0.0377116	chr6	108582894	SNX3;SNX3	365466	plus	S
cg20710635	47799	5.82743e-06	0.00363964	0.063054	chr6	108582940	SNX3;SNX3	365467	plus	S
cg16083439	47801	7.47271e-05	0.0276011	0.147768	chr6	108615723	LACE1	365472	plus	S
cg10834480	47967	3.48344e-05	0.0157105	0.101126	chr6	111928234	TRAF3IP2;TRAF3IP2;TRAF3IP2	365963	plus	S
cg13131840	48057	4.08154e-06	0.00268215	0.0993382	chr6	112942901		366143	plus	S
cg22867643	48097	1.26069e-05	0.00689845	0.0430913	chr6	114292802	HDAC2	366232	plus	S
cg01611372	48363	4.41611e-05	0.0186598	0.0832159	chr6	125372668	RNF217	366933	plus	S
cg08432204	48409	1.21479e-05	0.00675951	0.059246	chr6	126235516	NCOA7;NCOA7	367066	plus	S
cg03984009	48819	0.000114502	0.0375355	0.198696	chr6	136172553	PDE7B	368069	plus	S
cg03863486	48963	1.15249e-07	0.000110222	0.382086	chr6	138724410	HEBP2	368464	plus	S
cg06487334	49707	5.79355e-06	0.00363133	0.124577	chr6	155759026	NOX3	370416	plus	S
cg01036050	49796	2.12258e-06	0.00151572	0.0069021	chr6	157472067	ARID1B;ARID1B;ARID1B	370583	plus	S
cg21496803	50363	5.83143e-10	9.57283e-07	0.00972966	chr6	167029080	RPS6KA2;RPS6KA2	372282	plus	S
cg07537181	50441	8.6823e-05	0.0309999	0.0416559	chr6	167816104		372556	plus	S
cg06172235	50490	2.38683e-09	3.29888e-06	0.013474	chr6	168482099		372862	plus	S
cg24019399	50517	5.25898e-07	0.000433316	0.0269734	chr6	168677763		372997	plus	S
cg08112248	50558	4.53215e-08	4.8065e-05	0.0138373	chr6	169002003	SMOC2;SMOC2	373247	plus	S
cg00030427	50617	0.000109879	0.036382	0.062288	chr6	169562540		373464	plus	S
cg26723570	50669	1.01167e-09	1.55919e-06	0.0871258	chr6	170102133	WDR27;C6orf120;WDR27	373700	plus	S
cg04577718	50763	4.26422e-05	0.0181975	0.0707845	chr7	149795		374298	plus	S
cg09304803	50763	0.00016022	0.0466671	0.218635	chr7	149976		374299	plus	S
cg03423395	50789	0.000126913	0.0398209	0.0180968	chr7	588639		374535	plus	S
cg19062258	50843	8.07553e-05	0.0294193	0.0715907	chr7	1052779	C7orf50;C7orf50;C7orf50	375236	plus	S
cg02022181	50843	5.0318e-08	5.28409e-05	0.185467	chr7	1063891	C7orf50;C7orf50;MIR339;C7orf50	375272	plus	S
cg08719095	50851	2.69786e-06	0.00188875	0.0627669	chr7	1135190	C7orf50;C7orf50;C7orf50	375429	plus	S
cg22165106	50940	0.000120142	0.0387449	0.219269	chr7	1782220	ELFN1	376291	plus	S
cg21422361	50953	0.000118424	0.0383517	0.200413	chr7	1884392	MAD1L1;MAD1L1;MAD1L1	376379	plus	S
cg00798876	51053	9.43007e-05	0.0330122	0.110866	chr7	2670978	TTYH3	377398	plus	S
cg09450197	51103	8.62643e-12	2.08816e-08	0.161527	chr7	3134557		377695	plus	S
cg07874011	51103	3.57452e-10	6.27675e-07	0.229934	chr7	3134592		377696	plus	S
cg18422587	51103	4.50978e-06	0.00292321	0.396013	chr7	3134670		377697	plus	S
cg04160501	51203	3.63133e-05	0.0162238	0.10872	chr7	4723667	FOXK1	378052	plus	S
cg08906366	51214	2.28024e-11	5.08846e-08	0.0337313	chr7	4803811	FOXK1	378203	plus	S
cg20370909	51217	3.31756e-05	0.0151538	0.167634	chr7	4859229	RADIL	378306	plus	S
cg23512028	51234	9.64254e-09	1.15402e-05	0.030393	chr7	5085596	RBAK;RBAK	378408	plus	S
cg25692633	51323	1.80771e-05	0.00928685	0.0322569	chr7	6209226	CYTH3	378948	plus	S
cg16334869	51376	3.00477e-05	0.0140112	0.110186	chr7	6698992		379178	plus	S
cg16495016	51639	1.24836e-05	0.00686607	0.0406049	chr7	17704924		379843	plus	S
cg15952586	51665	2.19001e-07	0.000197542	0.0606481	chr7	18459971		379899	plus	S
cg11625631	51692	6.94812e-05	0.0262983	0.0927834	chr7	19453933		380006	plus	S
cg12424504	51711	0.000146523	0.0440242	0.116174	chr7	20179965	MACC1	380053	plus	S
cg02096916	51796	8.38592e-05	0.0302441	0.00521792	chr7	22396637	RAPGEF5	380275	plus	S
cg01650864	51970	1.11198e-05	0.00628544	0.11429	chr7	25734378		380763	plus	S
cg12299599	51979	4.15305e-05	0.0178475	0.255559	chr7	25934722		380823	plus	S
cg20725013	52029	0.000128861	0.0403002	0.0871172	chr7	27195036	HOXA7	381279	plus	S
cg01285501	52029	2.40349e-05	0.0117154	0.105517	chr7	27206461	HOXA9	381343	plus	S
cg08362210	52029	3.5755e-05	0.0160581	0.117869	chr7	27209828	MIR196B	381363	plus	S
cg27639569	52073	9.77644e-06	0.00569256	0.0665027	chr7	27936355	JAZF1	381655	plus	S
cg26956245	52248	8.57851e-05	0.0307012	0.192063	chr7	30518972	NOD1	382092	plus	S
cg27547265	52396	4.15164e-05	0.0178475	0.11545	chr7	33389821	BBS9;BBS9;BBS9;BBS9	382498	plus	S
cg06789764	53030	4.53496e-09	5.83492e-06	0.10321	chr7	45953207	IGFBP3;IGFBP3	384265	plus	S
cg25319337	53166	3.00527e-05	0.0140112	0.0704451	chr7	48008127	HUS1	384523	plus	S
ch.7.48734142F	53191	0.000100236	0.0343025	0.0222312	chr7	48763596		384611	plus	S
cg25823373	53229	0.000103492	0.035057	0.155433	chr7	50485923		384723	plus	S
cg24302095	53257	1.22135e-06	0.000927829	0.0309228	chr7	50861049	GRB10;GRB10	384837	plus	S
cg09748749	53636	8.08858e-05	0.0294193	0.173332	chr7	65540429	ASL;ASL;ASL;ASL	385893	plus	S
cg11791427	53952	3.59408e-05	0.0161152	0.328221	chr7	73704194	CLIP2;CLIP2	386769	plus	S
cg06743037	54235	5.61052e-10	9.31856e-07	0.0558252	chr7	80550531		387575	plus	S
cg14218938	54387	1.12811e-05	0.00635493	0.0336196	chr7	86853873		387877	plus	S
cg00033490	54392	8.94774e-07	0.000698308	0.042334	chr7	87027887	CROT;CROT	387898	plus	S
cg03973379	54573	2.98723e-06	0.00205441	0.0625521	chr7	92672484		388447	plus	S
cg12563520	54633	3.36673e-06	0.00228968	0.122348	chr7	94034808	COL1A2	388631	plus	S
cg19231180	54664	0.000161405	0.0469165	0.0454236	chr7	95029457		388848	plus	S
cg01367627	54802	1.42173e-06	0.00106681	0.120828	chr7	98477438	TRRAP	389450	plus	S
cg08623942	54818	7.41466e-07	0.000592697	0.0921118	chr7	98633538	SMURF1;SMURF1	389558	plus	S
cg07148145	54897	0.000119695	0.0386757	0.179731	chr7	99437259	CYP3A43;CYP3A43;CYP3A43	389879	plus	S
cg05712524	55018	6.80836e-06	0.00416726	0.18866	chr7	100608590		390629	plus	S
cg05711980	55018	1.60411e-05	0.00840209	0.183898	chr7	100608624		390630	plus	S
cg10476247	55018	3.0119e-05	0.0140249	0.16788	chr7	100608642		390631	plus	S
cg05448721	55018	4.39002e-10	7.5844e-07	0.180075	chr7	100608971		390632	plus	S
cg12851526	55018	3.78637e-05	0.0167282	0.0981964	chr7	100609034		390633	plus	S
cg06102775	55018	2.41644e-07	0.000214356	0.260608	chr7	100609375		390635	plus	S
cg01299997	55045	3.81174e-05	0.0167504	0.182925	chr7	100886961	FIS1	390840	plus	S
cg18017962	55206	2.01121e-06	0.00144514	0.0829259	chr7	102993340	SLC26A5;SLC26A5;PSMC2;SLC26A5	391360	plus	S
cg16527112	55213	7.49975e-05	0.0276533	0.0338332	chr7	103301932	RELN;RELN	391384	plus	S
cg27084965	55224	1.08841e-09	1.64945e-06	0.364449	chr7	103871917		391414	plus	S
cg03511856	55310	0.000131297	0.0408829	0.0845502	chr7	105439677	ATXN7L1;ATXN7L1	391621	plus	S
cg04454807	55491	0.000154281	0.0454	0.0355161	chr7	109600425	EIF3IP1	392061	plus	S
cg11394600	55543	4.80381e-07	0.00039888	0.133585	chr7	111721233	DOCK4	392135	plus	S
cg25345520	55674	0.000123513	0.0393392	0.114175	chr7	116210196		392469	plus	S
cg00670111	56114	9.07248e-08	8.9449e-05	0.203456	chr7	128500474		393637	plus	S
cg18934293	56239	4.52902e-06	0.00292717	0.201692	chr7	130131566	MEST;MEST;MEST;MESTIT1	394147	plus	S
cg07217824	56553	1.07933e-05	0.00615774	0.0586392	chr7	135665682		394908	plus	S
cg26422832	56802	4.67612e-05	0.0195847	0.0484449	chr7	140179608	MKRN1;MKRN1	395557	plus	S
cg15905634	56961	9.57012e-13	3.01498e-09	0.0536091	chr7	143140053	TAS2R60	396085	plus	S
cg27594583	57223	0	0	0.341425	chr7	150716029	ATG9B	397093	plus	S
cg00533407	57227	5.79652e-05	0.0230033	0.129101	chr7	150745278	ACCN3;ACCN3;ACCN3	397129	plus	S
cg19680441	57654	6.00988e-05	0.0236236	0.0326201	chr7	157528444	PTPRN2;PTPRN2;PTPRN2	399537	plus	S
cg15272173	57662	6.81386e-05	0.0259275	0.199187	chr7	157585857	PTPRN2;PTPRN2;PTPRN2	399622	plus	S
cg22011802	57686	7.9722e-06	0.00475068	0.0395204	chr7	157786631	PTPRN2;PTPRN2;PTPRN2	399843	plus	S
cg24506197	57742	3.09426e-05	0.0143325	0.26639	chr7	158201392	PTPRN2;PTPRN2;PTPRN2	400152	plus	S
cg17748769	57764	3.87527e-05	0.0169427	0.218084	chr7	158352181	PTPRN2;PTPRN2;PTPRN2	400298	plus	S
cg09803560	57797	0.00011153	0.0367584	0.191341	chr7	158664058	WDR60	400418	plus	S
cg21076424	57831	0.00012511	0.0396188	0.121024	chr7	159020356		400658	plus	S
cg19776282	57882	3.01476e-05	0.0140249	0.0930709	chr8	683148		400882	plus	S
cg16371838	57936	0.000126181	0.0397975	0.0571084	chr8	1108682		401222	plus	S
cg14499577	57970	1.05108e-07	0.000101429	0.267096	chr8	1414612		401506	plus	S
cg15239628	58080	2.89056e-07	0.000250704	0.0221983	chr8	2538305		402247	plus	S
cg19438658	58166	2.51619e-07	0.000221342	0.0470473	chr8	6407134	ANGPT2;ANGPT2;ANGPT2;MCPH1	402413	plus	S
cg25519723	58245	2.22017e-08	2.47005e-05	0.0952683	chr8	8402366		402636	plus	S
cg01273802	58402	1.184e-05	0.00661546	0.168146	chr8	10871371	XKR6	403113	plus	S
cg21789131	58412	5.42478e-06	0.00343828	0.0719254	chr8	10965430	XKR6	403158	plus	S
cg25329685	59011	7.51787e-05	0.0276963	0.180285	chr8	23315749	ENTPD4;ENTPD4	404999	plus	S
cg07616828	59120	0.000118378	0.0383517	0.15359	chr8	25775184	EBF2	405308	plus	S
cg22632756	59268	0.000118517	0.0383529	0.131086	chr8	28174192	PNOC	405813	plus	S
cg15964998	59275	9.49019e-13	3.01195e-09	0.266669	chr8	28270033		405860	plus	S
cg17816390	59607	2.12514e-05	0.0105876	0.0134253	chr8	37553296	ZNF703	406663	plus	S
cg06118302	59637	8.32115e-07	0.000657061	0.0738949	chr8	37820326		406816	plus	S
cg18799069	60281	1.01612e-05	0.00588326	0.14316	chr8	55014847	LYPLA1	408688	plus	S
cg07335376	60283	0.000125676	0.0397101	0.0495198	chr8	55047225	MRPL15	408694	plus	S
cg27004182	60340	2.15867e-06	0.00153637	0.14161	chr8	56827013	LYN;LYN	408888	plus	S
cg17197774	60420	0.000131444	0.0408991	0.274024	chr8	59467209	SDCBP;SDCBP;SDCBP;SDCBP;SDCBP	409164	plus	S
cg13976251	60584	1.03024e-07	0.000100093	0.355749	chr8	64325777		409555	plus	S
cg12634446	60636	3.01911e-05	0.0140299	0.0229709	chr8	67026411		409783	plus	S
cg26700215	60640	2.07166e-05	0.0103496	0.411818	chr8	67070006	TRIM55;TRIM55;TRIM55;TRIM55	409795	plus	S
cg20912169	60649	0.000116516	0.0380505	0.014724	chr8	67344720	ADHFE1;ADHFE1	409841	plus	S
cg18799048	60778	0.000123864	0.0393697	0.0317216	chr8	70747505	SLCO5A1	410207	plus	S
cg15726318	60817	1.57652e-14	9.12795e-11	0.142446	chr8	71315757	NCOA2	410292	plus	S
cg09067228	61122	1.02553e-05	0.00592177	0.0200975	chr8	82434468		411157	plus	S
cg05808793	61468	6.97358e-05	0.0263423	0.148042	chr8	95229525	CDH17;CDH17	411972	plus	S
cg15450160	61662	3.1922e-05	0.0147066	0.257276	chr8	99130171	POP1;POP1;HRSP12;POP1	412522	plus	S
cg16513933	61754	1.94739e-05	0.00987419	0.117189	chr8	101560889	ANKRD46	412809	plus	S
cg25116615	62068	2.30191e-08	2.54192e-05	0.0680647	chr8	108457411	ANGPT1	413573	plus	S
cg18447121	62584	1.63127e-05	0.00849929	0.316891	chr8	125547518	TATDN1;TATDN1;TATDN1	414832	plus	S
cg07560087	62600	2.33994e-05	0.0114579	0.0678721	chr8	125739038	MTSS1	414867	plus	S
cg07799299	62894	2.98972e-05	0.0139996	0.125892	chr8	131344855	ASAP1	415391	plus	S
cg14689150	63252	0.000140888	0.0430559	0.0610723	chr8	141362619	TRAPPC9;TRAPPC9	416208	plus	S
cg22610305	63264	0.000119828	0.0386897	0.0574231	chr8	141521720	CHRAC1;CHRAC1	416253	plus	S
cg18751637	63406	0.000128033	0.0400705	0.0879641	chr8	143171282		416971	plus	S
cg01020421	63462	2.20342e-06	0.00156562	0.0904573	chr8	143557441	BAI1	417259	plus	S
cg24641352	63545	0.00010637	0.0357449	0.121245	chr8	144328078	ZFP41	417683	plus	S
cg03894796	63548	0.000169685	0.0483716	0.381604	chr8	144361315		417736	plus	S
cg11388673	63550	0.000153882	0.0453763	0.455418	chr8	144371779		417754	plus	S
cg01869229	63558	9.0993e-05	0.0322736	0.0589176	chr8	144417236	TOP1MT	417832	plus	S
cg24596472	63558	8.47964e-05	0.0304212	0.250049	chr8	144417263	TOP1MT	417833	plus	S
cg19774973	63559	1.8025e-06	0.00130675	0.602216	chr8	144420279		417837	plus	S
cg23244022	63560	4.77618e-06	0.00306804	0.360606	chr8	144437350		417839	plus	S
cg17475774	63639	2.62463e-05	0.0126211	0.0757805	chr8	145118628		418735	plus	S
cg18246227	63672	9.5864e-08	9.41565e-05	0.496517	chr8	145638434	SLC39A4;SLC39A4	419017	plus	S
cg01099220	63681	3.41031e-09	4.53779e-06	0.186311	chr8	145747659	LRRC14	419223	plus	S
cg23359385	63682	7.8423e-05	0.0286941	0.141313	chr8	145759815	KIAA1688	419255	plus	S
cg13490753	63689	7.24321e-05	0.0271276	0.239354	chr8	145825518	KIAA1688	419305	plus	S
cg00517855	63715	0.00014577	0.0438905	0.179382	chr8	146016408	RPL8;RPL8	419427	plus	S
cg14431099	64160	0.000118274	0.0383517	0.022795	chr9	34329690	KIF24;NUDT2;NUDT2;NUDT2	420604	plus	S
cg14251009	64720	5.10131e-06	0.00325251	0.107887	chr9	90622205		422057	plus	S
cg21189224	64785	3.6381e-06	0.00244704	0.00691827	chr9	92277515	LOC100129066	422189	plus	S
cg21234162	64939	6.45954e-05	0.0249491	0.11923	chr9	96858147	PTPDC1;PTPDC1	422602	plus	S
cg20216130	65508	0.000151761	0.0450552	0.0386751	chr9	117374308	C9orf91	423995	plus	S
cg14414874	65718	0.000125366	0.0396704	0.113687	chr9	126157693	DENND1A	424520	plus	S
cg13630871	66025	6.98163e-05	0.0263423	0.109751	chr9	131583092	ENDOG	425436	plus	S
cg14352658	66228	5.81601e-06	0.00363782	0.164834	chr9	134407172	UCK1;UCK1	426074	plus	S
cg06821107	66375	5.07442e-05	0.0207855	0.097791	chr9	136243548	C9orf96;SURF4	426451	plus	S
cg22244122	66375	4.21382e-06	0.00275219	0.160629	chr9	136243698	C9orf96;SURF4	426452	plus	S
cg13557534	66616	0.000103227	0.0350185	0.0357281	chr9	138777875	CAMSAP1	427123	plus	S
cg13476777	66762	1.65344e-10	3.10714e-07	0.0104784	chr9	139911684	ABCA2;ABCA2	427862	plus	S
cg19794207	66779	0.000132817	0.0412065	0.13462	chr9	140040231	GRIN1;GRIN1;GRIN1	427970	plus	S
cg13811936	66876	0.000106542	0.0357469	0.378574	chr9	141017001	CACNA1B	428454	plus	S

## Sheet: BWS11_hyper
row.names	regionID	Pvalue_M	AdjustedPvalue_M	Betadif	chr	pos	Genename	Index	direction	significance
cg07548512	36	2.39865e-09	9.60483e-06	0.00826287	chr1	1155472	SDF4;SDF4	660	plus	S
cg01490733	156	7.95879e-05	0.0391631	0.120934	chr1	2247066		2052	plus	S
cg24605830	174	2.0376e-05	0.0163108	0.0429159	chr1	2454221	PANK4	2422	plus	S
cg13196578	1382	3.30413e-06	0.00460691	0.0292436	chr1	16008167		7737	plus	S
cg23039636	1822	2.38689e-05	0.0181326	0.0328019	chr1	20689117		9265	plus	S
cg06965071	1838	1.48062e-05	0.0130263	0.0796559	chr1	20834995	MUL1	9335	plus	S
cg26362272	1943	2.10898e-05	0.0166716	0.0985654	chr1	22108717	USP48;USP48	9670	plus	S
cg23271558	2060	2.03384e-05	0.0163108	0.0364827	chr1	23405725	KDM1A;KDM1A	10038	plus	S
cg08876437	2192	0.000100196	0.0443231	0.00795657	chr1	25228690	RUNX3;RUNX3	10606	plus	S
cg15497006	2374	7.12738e-05	0.0364657	0.165718	chr1	27147585		11399	plus	S
cg23201828	2600	3.83862e-06	0.00512261	0.0220586	chr1	30112807		12447	plus	S
cg16530130	2696	1.01314e-06	0.00177905	0.102909	chr1	31988357	LOC284551	12702	plus	S
cg11980897	2729	9.37534e-05	0.0430073	0.118974	chr1	32237457		12839	plus	S
cg26227027	2883	2.16203e-05	0.0169348	0.136376	chr1	33844886		13502	plus	S
cg08623979	3071	6.19877e-05	0.033619	0.187456	chr1	36936639	CSF3R;CSF3R;CSF3R;CSF3R	14248	plus	S
cg03909081	3378	3.34993e-06	0.00463448	0.026629	chr1	41218805	NFYC;NFYC;NFYC;NFYC;MIR30E;NFYC	15379	plus	S
cg05229931	3693	1.24519e-06	0.0021171	0.0420611	chr1	45000181	RNF220	16571	plus	S
cg15076218	3783	1.37668e-14	2.26864e-10	0.298727	chr1	46599002	PIK3R3;PIK3R3	17028	plus	S
cg11411929	4103	8.63355e-05	0.0409724	0.0525202	chr1	53679725	CPT2	18272	plus	S
cg19246266	4940	3.1366e-12	2.71215e-08	0.16405	chr1	68697366	GPR177;GPR177	20392	plus	S
cg06517794	5131	5.08206e-06	0.00618591	0.115515	chr1	78180274	USP33;USP33;USP33	20931	plus	S
cg26549529	5289	7.79562e-05	0.038569	0.0536999	chr1	85151778	SSX2IP;SSX2IP;SSX2IP;SSX2IP;SSX2IP	21295	plus	S
cg08480307	5884	8.66422e-05	0.0409739	0.123633	chr1	100547766	HIAT1	23076	plus	S
cg06059849	6057	8.68571e-05	0.0410303	0.0244679	chr1	109656930	KIAA1324;C1orf194	23612	plus	S
cg03966708	6284	1.79258e-05	0.0149424	0.0606831	chr1	112302816	DDX20	24465	plus	S
cg00157755	6541	2.07577e-05	0.0164395	0.037347	chr1	117209641	IGSF3;IGSF3	25294	plus	S
cg03436297	6772	4.20671e-07	0.00083832	0.0530523	chr1	145592743	POLR3C	26067	plus	S
cg03084710	6945	0.000120485	0.0483811	0.0576642	chr1	150603058	ENSA;ENSA;ENSA;ENSA;ENSA;ENSA;ENSA;ENSA	26752	plus	S
cg10332704	7051	1.57306e-05	0.0136827	0.0560919	chr1	151827384	THEM5	27272	plus	S
cg09416366	7202	7.90973e-06	0.00840936	0.018894	chr1	154241979	UBAP2L	28018	plus	S
cg06894549	7336	3.90625e-05	0.0254319	0.0248855	chr1	155890816	SNORA42;KIAA0907	28832	plus	S
cg17508273	7508	0.000104202	0.0450086	0.0261969	chr1	158019222	KIRREL	29692	plus	S
cg17296053	8069	2.84297e-05	0.0205615	0.0343634	chr1	167884595	ADCY10;ADCY10	31519	plus	S
cg12427163	8386	1.3005e-05	0.0120183	0.0427315	chr1	175834835		32398	plus	S
cg04890480	8628	5.96638e-05	0.0327735	0.106994	chr1	181073734		33076	plus	S
cg17170262	8848	8.76318e-06	0.00900392	0.292824	chr1	184715203	EDEM3	33596	plus	S
cg24678148	9003	1.92784e-05	0.0157665	0.055757	chr1	193227662		33961	plus	S
cg14640592	9382	6.42404e-06	0.00730084	0.184217	chr1	203044726	PPFIA4	35121	plus	S
cg17862152	9382	1.00458e-07	0.000256201	0.104617	chr1	203044930	PPFIA4	35122	plus	S
cg10985914	10022	8.08177e-05	0.0394193	0.293309	chr1	212769641	ATF3	37139	plus	S
cg00001364	10085	4.70301e-05	0.0287862	0.0428227	chr1	214170376	PROX1	37386	plus	S
cg11191302	10182	8.68853e-06	0.00897025	0.133053	chr1	215950212	USH2A	37576	plus	S
cg21908178	10434	1.75832e-05	0.0148592	0.0986683	chr1	222641292		38180	plus	S
cg17211296	10625	1.95248e-05	0.0158739	0.0268414	chr1	226016389	EPHX1;EPHX1	38705	plus	S
cg15323828	10629	5.99058e-05	0.0328643	0.202263	chr1	226053673	TMEM63A	38711	plus	S
cg00194374	10687	9.62009e-05	0.0433416	0.031781	chr1	226890928	ITPKB	38979	plus	S
cg23676767	10691	5.10432e-05	0.0301201	0.379654	chr1	226918736	ITPKB	38993	plus	S
cg16314254	10902	7.37632e-05	0.037254	0.0213537	chr1	230249965	GALNT2	39946	plus	S
cg20827629	10990	1.64963e-05	0.0141736	0.0449115	chr1	231500113	EGLN1	40258	plus	S
cg03013754	11007	5.87765e-05	0.0324525	0.0260925	chr1	231763026	TSNAX-DISC1;DISC1;DISC1;DISC1;TSNAX-DISC1;DISC1;DISC1;DISC1;DISC1;TSNAX-DISC1;DISC1;DISC1;TSNAX-DISC1;DISC1;TSNAX-DISC1;DISC1;DISC1;DISC1;DISC1;DISC1;TSNAX-DISC1;TSNAX-DISC1;DISC1;DISC1;DISC1;DISC1;DISC1;TSNAX-DISC1;DISC1;DISC1;DISC1	40308	plus	S
cg07913153	11295	0.000124604	0.0491484	0.0326992	chr1	236680761	LGALS8	41038	plus	S
cg24741598	11468	0.000119789	0.0483281	0.0593789	chr1	242011743	EXO1;EXO1;EXO1	41457	plus	S
cg11987916	11530	8.02383e-06	0.00846763	0.113494	chr1	244008859		41617	plus	S
cg01563741	11601	8.22556e-05	0.0398675	0.0189165	chr1	245022751	HNRNPU;HNRNPU	41825	plus	S
cg00747618	11783	9.08673e-05	0.0422721	0.0450634	chr1	247612701		42336	plus	S
cg17929590	11804	3.58777e-05	0.0240188	0.0360249	chr1	248074944		42451	plus	S
cg05903872	66947	8.19681e-05	0.0398183	0.068667	chr10	697901	DIP2C;C10orf108;C10orf108	43091	plus	S
cg27201679	66998	2.20864e-06	0.00333636	0.114719	chr10	1120794	WDR37	43326	plus	S
cg09265586	67053	2.56419e-06	0.00372422	0.0361258	chr10	1595595	ADARB2	43655	plus	S
cg20718223	67087	7.06831e-05	0.0363803	0.0263624	chr10	2035287		43799	plus	S
cg20282837	67188	1.19667e-05	0.0112723	0.0763481	chr10	3508379		44189	plus	S
cg13948050	67615	5.95562e-05	0.0327611	0.0748771	chr10	11865142	C10orf47	45420	plus	S
cg23079063	68294	5.66297e-09	2.00523e-05	0.108873	chr10	28975991		47474	plus	S
cg11337790	68352	1.66356e-08	5.4603e-05	0.0453415	chr10	29932431	SVIL	47585	plus	S
cg26378680	68533	4.24078e-10	2.10817e-06	0.0558958	chr10	33269778		48025	plus	S
cg02097843	68533	3.55957e-08	0.000104462	0.0109007	chr10	33269812		48026	plus	S
cg03799378	68900	2.47181e-06	0.00365194	0.080079	chr10	44498046		48955	plus	S
cg11322936	68993	1.16119e-06	0.00199806	0.111458	chr10	46065860	MARCH8;MARCH8	49231	plus	S
cg26110038	69581	2.05902e-10	1.11671e-06	0.0486335	chr10	65186905	JMJD1C	50732	plus	S
cg26292232	70014	7.90533e-06	0.00840936	0.117504	chr10	74047853		52007	plus	S
cg01075966	70257	3.22427e-05	0.0223899	0.0405889	chr10	77963297	C10orf11	52759	plus	S
cg09573389	70585	5.14125e-05	0.0302167	0.145343	chr10	82167757	C10orf58	53397	plus	S
cg27268110	70585	3.95049e-05	0.0256357	0.131613	chr10	82167764	C10orf58	53398	plus	S
cg03623770	70585	7.35168e-06	0.00801494	0.130463	chr10	82167774	C10orf58	53399	plus	S
cg11198968	70621	5.38718e-05	0.0309406	0.0316589	chr10	83676596	NRG3;NRG3;NRG3	53503	plus	S
cg25579085	71014	2.14645e-07	0.000471619	0.0535476	chr10	93665240		54582	plus	S
cg20095825	71103	0.000107926	0.0458744	0.0268584	chr10	95242170	MYOF;MYOF	54879	plus	S
cg07706844	71555	4.24253e-05	0.0268137	0.0830674	chr10	102509510	PAX2;PAX2;PAX2;PAX2;PAX2	56537	plus	S
cg10191772	71654	2.84556e-05	0.0205615	0.0116967	chr10	103825568	HPS6	57168	plus	S
cg04275337	71795	4.51573e-05	0.0280812	0.0403371	chr10	105348956	NEURL	57793	plus	S
cg25780389	72096	1.19706e-05	0.0112723	0.11959	chr10	114134915	ACSL5;ACSL5;ACSL5	58550	plus	S
cg22647566	72261	0.00011597	0.0476291	0.082071	chr10	116616356	FAM160B1;FAM160B1	58979	plus	S
cg04409081	72278	6.30312e-05	0.0338422	0.0333632	chr10	117707384	ATRNL1	59021	plus	S
cg04608419	72426	5.51474e-05	0.0312806	0.0816497	chr10	120517155		59596	plus	S
cg19396666	72761	2.80119e-05	0.0203422	0.218485	chr10	125866280		60603	plus	S
cg09872760	72849	3.36639e-05	0.0231517	0.0428765	chr10	126822658	CTBP2;CTBP2	60907	plus	S
cg23228835	72997	8.11165e-06	0.0085143	0.0674871	chr10	129692452	CLRN3	61282	plus	S
cg15621651	73005	7.27167e-05	0.0369146	0.0403943	chr10	129796199	PTPRE	61310	plus	S
cg20400955	73068	1.66199e-05	0.0141851	0.0669732	chr10	130828973		61535	plus	S
cg25946389	73094	4.26143e-05	0.0268883	0.131726	chr10	131265073	MGMT	61646	plus	S
cg03332810	73279	1.31652e-05	0.0121305	0.0211533	chr10	133750606	PPP2R2D;PPP2R2D;PPP2R2D	62501	plus	S
cg11229101	73338	6.77786e-05	0.0352429	0.0936275	chr10	134230885	PWWP2B;PWWP2B	63038	plus	S
cg22761205	73518	5.21364e-05	0.0304445	0.189459	chr11	457256	PTDSS2	65098	plus	S
cg12776156	73566	3.84983e-06	0.00512261	0.15008	chr11	848044	TSPAN4;TSPAN4;TSPAN4;TSPAN4;TSPAN4;TSPAN4;TSPAN4	65688	plus	S
cg10580341	73574	2.49327e-07	0.000534416	0.0240174	chr11	889148	CHID1;CHID1;CHID1;CHID1;CHID1	65734	plus	S
cg23419447	73645	7.77462e-05	0.0385418	0.170916	chr11	1507347	HCCA2	66457	plus	S
cg04310331	73709	6.84838e-06	0.00764123	0.136845	chr11	2012332	LOC100133545	66915	plus	S
cg25579157	73710	3.86339e-05	0.0253103	0.0741445	chr11	2020549	H19	66981	plus	S
cg02219360	73788	3.4696e-05	0.023559	0.179225	chr11	2721409	KCNQ1OT1;KCNQ1;KCNQ1	67764	plus	S
cg04656692	73855	1.34289e-05	0.0123206	0.161975	chr11	3239953	MRGPRG;C11orf36	68295	plus	S
cg09148649	73856	0.000117467	0.0479384	0.123661	chr11	3253659	MRGPRE	68318	plus	S
cg02992503	74351	6.82849e-08	0.000180599	0.0601359	chr11	10775409	CTR9	69963	plus	S
cg08575708	74355	9.85587e-05	0.0438051	0.0307073	chr11	10823259	SNORD97;EIF4G2;EIF4G2	69971	plus	S
cg07435350	74601	7.14611e-05	0.0364934	0.0291906	chr11	14539217	PSMA1;PSMA1;PSMA1	70472	plus	S
cg12426748	74979	1.0848e-06	0.00187416	0.113098	chr11	22454152		71701	plus	S
cg02123280	74979	2.59124e-06	0.00375079	0.0870363	chr11	22454233		71702	plus	S
cg16426510	75773	1.40945e-05	0.0127402	0.121583	chr11	46041219	PHF21A;PHF21A	74168	plus	S
cg09948336	76639	5.23937e-05	0.0304592	0.102497	chr11	64394492	NRXN2;NRXN2;NRXN2	77824	plus	S
cg13306893	76851	9.40252e-05	0.0430073	0.0142017	chr11	66024688	KLC2;KLC2;KLC2;KLC2	79150	plus	S
cg23842205	76892	5.81024e-12	4.61006e-08	0.0107493	chr11	66394024	RBM14	79540	plus	S
cg06210783	77073	6.88827e-08	0.000181063	0.00705102	chr11	68205335	LRP5	80622	plus	S
cg10751960	77095	1.02922e-06	0.00179989	0.140679	chr11	68461824		80696	plus	S
cg21187108	77270	2.9368e-07	0.00061681	0.0693523	chr11	70224383	PPFIA1;PPFIA1	81475	plus	S
cg02399233	77377	5.23581e-11	3.20474e-07	0.00949106	chr11	71201915	NADSYN1	81897	plus	S
cg26642432	77575	0.000117481	0.0479384	0.0330912	chr11	73529396	MRPL48	82544	plus	S
cg25921194	77652	0.000105869	0.045424	0.370792	chr11	74492567	RNF169	82756	plus	S
cg11458618	77908	0.000120003	0.0483489	0.0575786	chr11	78147532	NARS2;NARS2	83577	plus	S
cg08105174	78536	5.11075e-05	0.0301201	0.114857	chr11	100502854		85118	plus	S
cg20840002	78729	7.10276e-08	0.000185562	0.0543156	chr11	105924441	KBTBD3;KBTBD3	85568	plus	S
cg20912066	78754	3.52708e-05	0.0238359	0.0372313	chr11	107436729	ALKBH8	85660	plus	S
cg13965922	79292	1.35971e-07	0.000323654	0.034564	chr11	117299194	DSCAML1	87232	plus	S
cg16130802	79412	1.13827e-11	8.5561e-08	0.0186591	chr11	118773983	BCL9L	87693	plus	S
cg08452327	80136	9.12096e-05	0.0423325	0.0785676	chr11	128379171	ETS1;ETS1;ETS1	89781	plus	S
cg21093670	80223	3.35596e-05	0.023144	0.280119	chr11	129684147		90104	plus	S
cg13408712	80241	4.10337e-05	0.0264106	0.127734	chr11	129817591	PRDM10;PRDM10;PRDM10;PRDM10	90145	plus	S
cg20771240	80526	8.23189e-07	0.00150085	0.0207997	chr11	133906693	LOC100128239	90884	plus	S
cg03206660	80540	9.6593e-07	0.00170312	0.03688	chr11	134021905		90932	plus	S
cg19027126	80902	1.9663e-05	0.0159508	0.19131	chr12	3646576	PRMT8	92156	plus	S
cg05739305	80925	6.22783e-08	0.000167821	0.11912	chr12	3984963		92215	plus	S
cg13391820	80947	2.74324e-05	0.0200252	0.0695636	chr12	4384404	CCND2	92309	plus	S
cg05179921	81321	0.000125155	0.0491958	0.0733851	chr12	9905753	CD69	93823	plus	S
cg11375112	81435	0.000112249	0.0467839	0.0638325	chr12	11883006	ETV6	94099	plus	S
cg26320601	81999	3.07544e-05	0.021637	0.0282476	chr12	26986803	ITPR2	95557	plus	S
cg09257092	81999	0	0	0.42302	chr12	26986805	ITPR2	95558	plus	S
cg21742213	82191	9.41139e-05	0.0430073	0.044427	chr12	31670272	DENND5B	96008	plus	S
cg22022442	82201	6.4719e-05	0.0342135	0.0388293	chr12	31811083	C12orf72;C12orf72	96034	plus	S
cg03689601	82426	3.95495e-05	0.0256357	0.100551	chr12	44123569	PUS7L;PUS7L;PUS7L	96704	plus	S
cg23347835	82517	0.000109431	0.0462848	0.0680351	chr12	46599935	SLC38A1;SLC38A1	96946	plus	S
cg00395210	82651	9.54933e-05	0.0431037	0.0361927	chr12	48592465		97337	plus	S
cg00201175	82653	3.52004e-06	0.00478788	0.0824367	chr12	48690546		97346	plus	S
cg03187301	82753	2.16809e-06	0.00330581	0.0756311	chr12	49958768	MCRS1;MCRS1	97903	plus	S
cg22146245	83554	3.15795e-05	0.0220365	0.148786	chr12	62857919		101759	plus	S
cg17742617	83562	9.82465e-05	0.0437798	0.0456241	chr12	63039927	PPM1H	101800	plus	S
cg15016701	83579	5.65181e-05	0.0315968	0.168092	chr12	63211683	PPM1H	101826	plus	S
cg02020384	83833	3.70921e-06	0.00496636	0.0547894	chr12	68704235	MDM1	102405	plus	S
cg25970454	84125	1.03078e-09	4.60044e-06	0.1202	chr12	76957699		103141	plus	S
cg26102342	84794	1.46774e-08	4.87489e-05	0.0817709	chr12	98878655		104651	plus	S
cg19351533	85404	6.38728e-05	0.0339959	0.162883	chr12	110506707	C12orf76	106523	plus	S
cg21873153	86025	3.76345e-08	0.00010822	0.0508191	chr12	120887860	GATC	108796	plus	S
cg26794418	86211	9.36838e-05	0.0430073	0.0314473	chr12	123001911	RSRC2;RSRC2;RSRC2	109589	plus	S
cg03861798	86474	1.36321e-06	0.00226385	0.0914321	chr12	125506978	BRI3BP	110689	plus	S
cg27608806	86475	6.47155e-06	0.00731602	0.00550846	chr12	125509780	BRI3BP	110692	plus	S
cg26980477	86527	2.07052e-06	0.00317966	0.0333386	chr12	126641914		110825	plus	S
cg18575346	86891	8.14581e-05	0.0396508	0.00742844	chr12	132529914	EP400	112254	plus	S
cg08085917	86942	5.22159e-10	2.5423e-06	0.00765405	chr12	133147010	FBRSL1	113067	plus	S
cg06462703	86981	6.16807e-06	0.00710416	0.00669828	chr12	133430564	CHFR;CHFR;CHFR;CHFR;CHFR	113452	plus	S
cg02640104	87636	2.25132e-05	0.0174212	0.0328308	chr13	30476615		115517	plus	S
cg21222187	87750	8.64984e-05	0.0409739	0.0757193	chr13	32258346		115781	plus	S
cg17000666	88312	1.2582e-05	0.0117192	0.0470466	chr13	45082099	TSC22D1	117195	plus	S
cg03135713	88425	1.65073e-05	0.0141736	0.0723562	chr13	46961897	C13orf18	117509	plus	S
cg25215047	88649	8.20205e-07	0.00150085	0.08772	chr13	51733079		118177	plus	S
cg10373891	88700	0.000100608	0.0443934	0.0724643	chr13	52338758		118279	plus	S
cg05002124	89238	8.57003e-05	0.0408441	0.0122108	chr13	79980059	RBM26	119536	plus	S
cg23724635	89601	3.8321e-05	0.0251437	0.0199429	chr13	99174494	STK24;STK24	120439	plus	S
cg01185345	89607	6.47751e-05	0.0342135	0.289303	chr13	99218287	STK24	120453	plus	S
cg00124836	90086	1.58361e-09	6.78509e-06	0.0117613	chr13	111295144	CARS2	121870	plus	S
cg13515875	90090	3.05084e-09	1.17761e-05	0.0880803	chr13	111330802	CARS2	121903	plus	S
cg23052386	90112	0.000104208	0.0450086	0.169258	chr13	111553101	ANKRD10	122007	plus	S
cg22795345	90151	7.97964e-06	0.00844179	0.0128904	chr13	111935508	ARHGEF7;ARHGEF7;ARHGEF7;ARHGEF7;ARHGEF7	122122	plus	S
cg00377087	90241	8.90106e-05	0.0417255	0.0216002	chr13	112901213		122684	plus	S
cg12758082	90284	5.49122e-05	0.031245	0.21994	chr13	113407769	ATP11A;ATP11A	122974	plus	S
cg23719132	90298	8.09852e-06	0.0085143	0.0137139	chr13	113525257	ATP11A;ATP11A	123179	plus	S
cg17171260	90300	4.42284e-05	0.0276641	0.0275467	chr13	113539207	ATP11A;ATP11A	123214	plus	S
cg16325826	90322	4.69615e-05	0.0287853	0.0107535	chr13	113719136	MCF2L;MCF2L	123495	plus	S
cg18199581	90357	3.06598e-05	0.021637	0.0356882	chr13	113974507	LAMP1	123729	plus	S
cg00242786	90377	2.59148e-05	0.0192608	0.0286345	chr13	114108471	ADPRHL1	123897	plus	S
cg13167816	90748	8.43085e-05	0.0404507	0.240168	chr14	24601808	FITM1	125895	plus	S
cg11147815	90771	6.54107e-05	0.0343872	0.0187842	chr14	24740287	RABGGTA;RABGGTA	126072	plus	S
cg21911968	91033	8.23586e-05	0.0398724	0.433604	chr14	36278684	RALGAPA1;RALGAPA1	126926	plus	S
cg00994032	91260	2.46644e-05	0.0186288	0.106231	chr14	50315768	SDCCAG1	127731	plus	S
cg20969923	91324	9.57221e-07	0.00169474	0.183863	chr14	51295867	NIN;NIN;NIN	127924	plus	S
cg01899130	91591	0.00012469	0.0491484	0.538248	chr14	55348681	GCH1;GCH1;GCH1;GCH1	128551	plus	S
cg13175173	91628	9.55722e-05	0.0431037	0.0290889	chr14	55914753		128679	plus	S
cg14463129	92199	4.77272e-06	0.00592725	0.0282824	chr14	68145073	RDH11	130319	plus	S
cg07139509	92353	0.000106362	0.0454351	0.0187249	chr14	70038717	C14orf162	130669	plus	S
cg07485769	92440	6.34304e-05	0.0338445	0.0992676	chr14	71323515		130932	plus	S
cg23157916	92649	2.51272e-06	0.00368695	0.126203	chr14	74964718		131555	plus	S
cg09929567	92742	2.95088e-05	0.021002	0.0602905	chr14	75936789	JDP2;JDP2;JDP2;JDP2	131871	plus	S
cg01085736	93198	4.63922e-06	0.00579504	0.0535149	chr14	89851504	FOXN3;FOXN3	133045	plus	S
cg23711881	93262	6.12168e-06	0.00709837	0.073934	chr14	90744400	C14orf102;C14orf102	133211	plus	S
cg26259944	93350	1.72758e-05	0.0146572	0.0346457	chr14	91848948	CCDC88C	133477	plus	S
cg16438210	93355	7.45985e-05	0.0375266	0.0154499	chr14	91885492	CCDC88C	133498	plus	S
cg14409461	93356	0.000124137	0.0491394	0.0608461	chr14	91925021	SMEK1	133500	plus	S
cg04712122	93793	6.44825e-05	0.0342135	0.284028	chr14	99655747	BCL11B;BCL11B	134766	plus	S
cg21093007	93841	0.000115448	0.0475559	0.0341768	chr14	100067091	CCDC85C	134919	plus	S
cg05168580	94186	0.000123286	0.049039	0.236855	chr14	103572194	C14orf73	136583	plus	S
cg13512374	94220	2.74353e-05	0.0200252	0.322757	chr14	103895494	MARK3;MARK3;MARK3;MARK3;MARK3	136712	plus	S
cg09315921	94361	0.000121736	0.0487462	0.14306	chr14	105219300	SIVA1;SIVA1	137442	plus	S
cg13311886	94584	2.28021e-05	0.0175398	0.0449521	chr15	22979752	CYFIP1;CYFIP1	138440	plus	S
cg17907520	94962	8.34707e-05	0.0402289	0.198839	chr15	31680189		139815	plus	S
cg16541929	95311	0.000113046	0.0470567	0.064058	chr15	40214068	GPR176	140717	plus	S
cg17018786	95362	4.40136e-06	0.00561246	0.119925	chr15	40659816	DISP2	140936	plus	S
cg16793607	95879	4.6861e-07	0.000921003	0.109926	chr15	50559131	HDC	142776	plus	S
cg12417176	96068	6.1108e-05	0.0334382	0.131936	chr15	55788778	DYX1C1;DYX1C1;DYX1C1	143357	plus	S
cg11313386	96100	6.406e-05	0.0340532	0.0597417	chr15	56657991	TEX9	143465	plus	S
cg09736950	96431	5.24708e-05	0.0304626	0.0378719	chr15	62938334	MGC15885;TLN2	144283	plus	S
cg06211385	96648	8.79953e-06	0.00901965	0.131943	chr15	65400172	LOC390595	144900	plus	S
cg06650067	96703	6.19683e-05	0.033619	0.0986095	chr15	66084924	DENND4A;DENND4A	145106	plus	S
cg04543131	96791	9.54763e-06	0.00955635	0.123136	chr15	67073942	SMAD6;SMAD6;SMAD6	145346	plus	S
cg03531899	96833	1.05504e-05	0.0102736	0.132997	chr15	67448980	SMAD3;SMAD3;SMAD3	145430	plus	S
cg19281068	97248	7.76107e-05	0.0385418	0.0330307	chr15	73345607	NEO1	146500	plus	S
cg07194295	97328	6.5174e-05	0.0343471	0.0337499	chr15	74314816	PML;PML;PML;PML;PML;PML;PML;PML;PML	146720	plus	S
cg16795352	97774	2.52077e-07	0.000537332	0.0588728	chr15	80368845	ZFAND6	148283	plus	S
cg18391127	98212	9.58639e-06	0.00955635	0.128165	chr15	89462418		149456	plus	S
cg12006733	98276	5.43121e-13	5.41171e-09	0.00765091	chr15	90177014	KIF7	149740	plus	S
cg07007674	98347	7.47031e-05	0.0375266	0.00773528	chr15	90931452	IQGAP1	150031	plus	S
cg24288310	98458	2.15291e-05	0.0169348	0.0408364	chr15	92936678	ST8SIA2	150364	plus	S
cg01367666	99168	1.55915e-11	1.11338e-07	0.00784679	chr16	2052269	ZNF598	154702	plus	S
cg04262392	99178	1.15791e-05	0.0110987	0.00634079	chr16	2136746	TSC2;TSC2;TSC2	154854	plus	S
cg02159643	99258	5.54249e-05	0.0312806	0.0411857	chr16	2816725	SRRM2	155384	plus	S
cg14658900	99354	0	0	0.552688	chr16	3450923	ZNF174;ZNF174;ZNF434	155975	plus	S
cg00547530	99367	4.00101e-06	0.00529091	0.109951	chr16	3559687	CLUAP1;CLUAP1	156057	plus	S
cg07904879	99556	3.00278e-05	0.021336	0.0248819	chr16	5121459	ALG1	156861	plus	S
cg10015175	99557	2.27306e-05	0.0175163	0.153004	chr16	5124731	ALG1	156870	plus	S
cg07812059	99677	6.45167e-06	0.00731285	0.033014	chr16	8988812	USP7	157146	plus	S
cg05249026	99773	7.32995e-05	0.0371225	0.319401	chr16	11031524	DEXI	157403	plus	S
cg26597734	99790	1.17871e-05	0.0111827	0.0286732	chr16	11150952	CLEC16A	157439	plus	S
cg09417209	99846	5.2382e-05	0.0304592	0.155686	chr16	11715746		157604	plus	S
cg02533339	99975	3.45725e-05	0.023559	0.0662122	chr16	14403040	MIR365-1	157928	plus	S
cg19423311	100542	5.12855e-05	0.0301835	0.165983	chr16	27413904	IL21R;IL21R;IL21R	159415	plus	S
cg08620426	100680	1.77043e-05	0.0148735	0.388238	chr16	29607030		159868	plus	S
cg26709300	100725	0.000119694	0.0483281	0.229407	chr16	30106682	YPEL3;YPEL3	160213	plus	S
cg04289959	100769	8.5343e-05	0.0407191	0.0241266	chr16	30675634	FBRS	160528	plus	S
cg08455111	100776	3.72945e-08	0.000107967	0.00906475	chr16	30750482	SRCAP	160569	plus	S
cg17282882	100814	0.000113477	0.0470694	0.0136131	chr16	31045464	STX4	160823	plus	S
cg06285575	100882	0.000127989	0.0498902	0.43555	chr16	31888794	ZNF267	161222	plus	S
cg04614386	101179	2.05529e-05	0.016368	0.0387906	chr16	50613953	NKD1	162011	plus	S
cg27042584	101217	5.81015e-06	0.00687678	0.237579	chr16	51168485		162120	plus	S
cg14510333	101217	4.26326e-14	6.29868e-10	0.194992	chr16	51168503		162121	plus	S
cg06291266	101428	1.56871e-06	0.00251004	0.127791	chr16	56481617	NUDT21	162778	plus	S
cg04276536	101537	5.2877e-05	0.0305742	0.187657	chr16	57567813	CCDC102A	163194	plus	S
cg00049664	101804	0.000105193	0.0452969	0.0946927	chr16	66613334	CMTM2	163910	plus	S
cg03125605	101863	4.26742e-05	0.0268883	0.0637621	chr16	67236337	MIR328;ELMO3	164262	plus	S
cg08958168	101940	5.08255e-05	0.030078	0.134718	chr16	68001415	SLC12A4;SLC12A4;SLC12A4;SLC12A4	164712	plus	S
cg03084808	102063	2.18398e-05	0.0170755	0.251281	chr16	69603300	NFAT5;NFAT5;NFAT5;NFAT5;NFAT5	165192	plus	S
cg00732059	102203	1.76957e-05	0.0148735	0.0665954	chr16	71740210	PHLPP2	165636	plus	S
cg03602233	102373	0.000112189	0.0467839	0.24752	chr16	75144040	ZNRF1	166119	plus	S
cg03147852	102626	8.9652e-06	0.0091002	0.262625	chr16	81353400	GAN	166789	plus	S
cg04546061	102836	3.7582e-10	1.94003e-06	0.0644969	chr16	84689043	KLHL36	167414	plus	S
cg27051119	102989	5.60682e-07	0.00106768	0.0304377	chr16	85700212	KIAA0182;KIAA0182	168128	plus	S
cg08787837	103038	1.20581e-07	0.000298634	0.458746	chr16	86029554		168314	plus	S
cg03152084	103191	7.07654e-05	0.0363803	0.0502587	chr16	87352229		168890	plus	S
cg10088879	103292	0.000104643	0.0451508	0.0330287	chr16	88094206	BANP;BANP	169434	plus	S
cg06816077	103343	3.12845e-11	2.06216e-07	0.0118569	chr16	88513379		169690	plus	S
cg09786329	103384	1.29565e-07	0.000315413	0.00594111	chr16	88821445	FAM38A	170052	plus	S
cg27248474	103400	9.8698e-05	0.0438084	0.0810009	chr16	88991238	CBFA2T3;CBFA2T3	170323	plus	S
cg26975681	103528	1.46033e-06	0.00238811	0.0401495	chr16	89872011	FANCA;FANCA	171271	plus	S
cg00145352	103863	5.54859e-05	0.0312806	0.0232251	chr17	2319906	LOC284009;METT10D	173039	plus	S
cg25657222	104194	2.2909e-07	0.000498248	0.0533878	chr17	6556270	C17orf100;MED31;C17orf100	174494	plus	S
cg13855384	104237	3.56128e-06	0.00482865	0.0599144	chr17	7151975	DULLARD;DULLARD	174843	plus	S
cg26963545	104246	4.51677e-06	0.00569187	0.00943009	chr17	7219319	NEURL4;NEURL4;GPS2	174961	plus	S
cg09568217	104259	4.67484e-05	0.0286958	0.17361	chr17	7311868	NLGN2	175077	plus	S
cg20327341	104265	1.43623e-05	0.0128859	0.0118471	chr17	7369208	ZBTB4;ZBTB4	175171	plus	S
cg10001987	104266	4.74852e-05	0.0289407	0.15227	chr17	7381769	ZBTB4;ZBTB4	175178	plus	S
cg21011913	104268	5.48176e-05	0.031245	0.0414322	chr17	7392218	POLR2A	175206	plus	S
cg20358227	104700	4.54054e-06	0.00570505	0.0247046	chr17	15134230	PMP22;PMP22;PMP22	176956	plus	S
cg00459589	104854	1.92218e-07	0.000431688	0.165324	chr17	17180131	COPS3	177403	plus	S
cg24136700	104913	7.85321e-05	0.0388091	0.142399	chr17	17696044	RAI1	177590	plus	S
cg02278959	104990	2.58811e-05	0.0192608	0.168011	chr17	18576472	ZNF286B;FOXO3B	177906	plus	S
cg11465639	105023	6.23048e-05	0.0337057	0.116866	chr17	19241549		178006	plus	S
cg23877242	105342	0.000117617	0.0479484	0.0905787	chr17	27233193	PHF12	179218	plus	S
cg12397433	105767	7.84278e-06	0.00837977	0.0833607	chr17	34842221	ZNHIT3	180666	plus	S
cg00152259	105779	8.98432e-06	0.0091002	0.0905864	chr17	34957477	MRM1	180733	plus	S
cg27572510	105825	3.71346e-08	0.000107967	0.0641722	chr17	35474613	ACACA;ACACA;ACACA;ACACA;ACACA	180913	plus	S
cg08815745	105913	4.81277e-05	0.0291663	0.0498621	chr17	36828454	C17orf96;C17orf96	181204	plus	S
cg23663547	106097	1.9951e-05	0.0160996	0.258289	chr17	38710320	CCR7	182202	plus	S
cg10664339	106103	6.57231e-05	0.0345091	0.146312	chr17	38800752	SMARCE1	182218	plus	S
cg26086101	106118	0.000113484	0.0470694	0.0396965	chr17	38992251	TMEM99	182286	plus	S
cg13249593	106198	4.8619e-05	0.0292983	0.0140296	chr17	39705234		182529	plus	S
cg08323969	106327	0.00010596	0.045424	0.171392	chr17	40770823		183173	plus	S
cg18982073	106501	7.66756e-06	0.0082543	0.156637	chr17	42275458	ATXN7L3;ATXN7L3;ATXN7L3;ATXN7L3	184021	plus	S
cg18929316	106821	7.47105e-05	0.0375266	0.11557	chr17	46176848	CBX1;CBX1	185328	plus	S
cg16789104	106837	3.26205e-06	0.00456747	0.014648	chr17	46507777	SKAP1;SKAP1	185378	plus	S
cg05555337	106856	9.43914e-05	0.0430073	0.0484332	chr17	46669113	LOC404266;HOXB5;LOC404266;LOC404266;LOC404266	185565	plus	S
cg04798252	107901	0.000119119	0.0482395	0.0473152	chr17	65850433	BPTF;BPTF	189401	plus	S
cg08875869	108115	1.11942e-05	0.0108023	0.0214122	chr17	70770808	SLC39A11;SLC39A11	189861	plus	S
cg09779152	108339	5.78922e-05	0.032121	0.0429385	chr17	73205364	NUP85	190743	plus	S
cg19808047	108572	2.22718e-05	0.0173185	0.178661	chr17	75241555		191889	plus	S
cg13628937	108660	1.27583e-07	0.000314159	0.101882	chr17	75969881		192188	plus	S
cg25597760	108857	4.11831e-07	0.00082454	0.277117	chr17	77766120		193156	plus	S
cg06782090	108858	3.44377e-06	0.00472917	0.12217	chr17	77787880		193220	plus	S
cg18902820	108925	6.35368e-07	0.00119356	0.0642525	chr17	78323643	RNF213	193691	plus	S
cg05533971	109089	1.10776e-05	0.0107139	0.0178308	chr17	79606645		195073	plus	S
cg21823502	109115	7.86891e-05	0.0388419	0.0213359	chr17	79856430	ANAPC11;ANAPC11;ANAPC11;ANAPC11;ANAPC11;ANAPC11;ANAPC11	195355	plus	S
cg26847156	109449	6.33775e-05	0.0338445	0.122833	chr18	10550303	NAPG	197769	plus	S
cg06306636	109516	1.20991e-05	0.0113683	0.0318866	chr18	12455633	SPIRE1;SPIRE1;SPIRE1	198020	plus	S
cg05948372	109604	2.73109e-05	0.0200252	0.0456438	chr18	19283268	ABHD3	198333	plus	S
cg07202461	109607	4.82262e-08	0.000133491	0.102753	chr18	19406765	MIB1;MIR133A1	198356	plus	S
cg19681626	109709	4.88064e-06	0.00601559	0.0331919	chr18	28625997		198838	plus	S
cg17789102	109952	4.61201e-05	0.0284323	0.160469	chr18	45688478		199863	plus	S
cg07211476	110052	0.0001073	0.0456828	0.288422	chr18	53448189		200339	plus	S
cg14360865	110150	5.18339e-06	0.00623835	0.0161381	chr18	59560371	RNF152	200752	plus	S
cg02775417	110589	4.50407e-06	0.00569187	0.0108914	chr19	643457	FGF22	202788	plus	S
cg22580935	110769	1.86108e-05	0.0153936	0.176814	chr19	2041905	MKNK2;MKNK2	204352	plus	S
cg26647303	110769	9.11308e-05	0.0423325	0.210956	chr19	2041955	MKNK2;MKNK2	204353	plus	S
cg13078421	110843	3.78451e-05	0.0249461	0.285772	chr19	2624622	GNG7	204887	plus	S
cg00524220	110907	3.61373e-05	0.0241336	0.0417243	chr19	3098963	GNA11	205186	plus	S
cg00488740	111056	8.25703e-06	0.00862872	0.0855381	chr19	4292274	TMIGD2;TMIGD2	206072	plus	S
cg00876266	111216	1.20037e-12	1.11806e-08	0.00362722	chr19	5915133	CAPS;CAPS	206989	plus	S
cg11369662	111561	1.4539e-06	0.00238671	0.00324891	chr19	10465257	TYK2	208788	plus	S
cg07982896	111845	1.47826e-05	0.0130263	0.079527	chr19	13365938	CACNA1A;CACNA1A	210531	plus	S
cg05208396	111877	1.26435e-06	0.00212636	0.151056	chr19	13975186		210675	plus	S
cg07094853	111882	4.15555e-05	0.0264708	0.0284221	chr19	14017434	C19orf57;CC2D1A	210722	plus	S
cg02720566	112239	1.5863e-05	0.0137583	0.11183	chr19	18230196	MAST3	212543	plus	S
cg05209525	112243	1.95002e-05	0.0158739	0.00563236	chr19	18255980	MAST3	212554	plus	S
cg23388763	112848	0.000102383	0.044464	0.0551754	chr19	36726982	ZNF146;ZNF146;ZNF146	215556	plus	S
cg13571293	113058	2.73835e-05	0.0200252	0.0438886	chr19	39739555		216545	plus	S
cg15142488	113273	6.19369e-07	0.00116904	0.0143794	chr19	42348947	LYPD4;DMRTC2	217639	plus	S
cg07685765	113813	4.12544e-05	0.0264211	0.0477666	chr19	48964041	KCNJ14;KCNJ14	220466	plus	S
cg04660111	113840	8.2919e-06	0.00864407	0.140256	chr19	49199234	FUT2;FUT2;FUT2;FUT2	220659	plus	S
cg12103897	113877	0.000125764	0.0493898	0.0427528	chr19	49592617	SNRNP70	220936	plus	S
cg22307029	113902	0.000127716	0.0498813	0.345	chr19	49891270	CCDC155	221094	plus	S
cg20071427	114293	2.32425e-05	0.0177512	0.09021	chr19	54058085	ZNF331;ZNF331;ZNF331	222998	plus	S
cg06445981	114309	9.8286e-06	0.00975758	0.110622	chr19	54206017	MIR518B	223065	plus	S
cg20113693	114438	3.16502e-12	2.71215e-08	0.0107816	chr19	55740757	TMEM86B	223790	plus	S
cg07938869	114496	9.24885e-05	0.0427018	0.0154511	chr19	56154165	ZNF581;ZNF580;ZNF580;ZNF580	224191	plus	S
cg23676538	114763	5.11751e-08	0.000139658	0.201682	chr19	59070579	UBE2M;LOC100131691	225542	plus	S
cg27425331	11958	1.42007e-05	0.0128092	0.0326312	chr2	1105592	SNTG2	226061	plus	S
cg15346781	12274	6.29337e-05	0.0338422	0.429466	chr2	7017571	RSAD2	227334	plus	S
cg24619785	12416	9.88608e-06	0.00975979	0.0311744	chr2	9416069	ASAP2;ASAP2	227687	plus	S
cg10551856	12555	9.17846e-05	0.0425142	0.207628	chr2	10774704	NOL10	228098	plus	S
cg14053001	13102	3.46379e-05	0.023559	0.0265808	chr2	24338244	PFN4	229553	plus	S
cg20311770	13203	5.69307e-06	0.00677564	0.079329	chr2	25816655	DTNB;DTNB;DTNB;DTNB;DTNB	229895	plus	S
cg01051318	13323	5.84905e-06	0.00688479	0.0649312	chr2	27440764	CAD	230417	plus	S
cg17336455	13867	4.30491e-06	0.00554553	0.0225762	chr2	38833015		231859	plus	S
cg11659317	14128	8.95004e-05	0.0418673	0.175914	chr2	43863985	PLEKHH2	232470	plus	S
cg13823166	14399	8.05704e-05	0.0394074	0.0768671	chr2	47603759	EPCAM;MIR559	233228	plus	S
cg20560185	14431	3.55291e-05	0.023935	0.0431337	chr2	48040004	FBXO11;FBXO11	233315	plus	S
cg18456312	14638	7.53983e-06	0.0081578	0.0655328	chr2	55183957	EML6	233792	plus	S
cg19445734	14674	6.93894e-05	0.0358629	0.140537	chr2	55566679	CCDC88A;CCDC88A	233894	plus	S
cg25962992	14818	2.40828e-05	0.0182627	0.026198	chr2	60986556	PAPOLG	234254	plus	S
cg21785710	14918	9.51433e-06	0.00954677	0.090151	chr2	63662027	C2orf86;C2orf86	234652	plus	S
cg19484848	14926	6.57155e-08	0.000175976	0.103203	chr2	63829110	MDH1	234674	plus	S
cg14586258	15114	7.78111e-05	0.0385418	0.101535	chr2	66823365		235181	plus	S
cg14716306	15167	6.32443e-05	0.0338445	0.113072	chr2	68145489		235249	plus	S
cg25804718	15283	5.50991e-07	0.00105391	0.0726327	chr2	69870025	AAK1	235532	plus	S
cg27421117	15537	1.87092e-05	0.0154452	0.0580557	chr2	74215659		236549	plus	S
cg06104657	15584	5.20491e-05	0.0304445	0.0144113	chr2	74734831	PCGF1	236835	plus	S
cg24085438	15818	1.85035e-05	0.0153373	0.138434	chr2	85244591	KCMF1	237462	plus	S
cg24074432	15844	3.9526e-07	0.000795078	0.134948	chr2	85505567	TCF7L1	237513	plus	S
cg05580277	15955	3.62182e-05	0.0241336	0.0613853	chr2	86791105	VPS24;VPS24	237950	plus	S
cg14875081	16113	6.91244e-06	0.00767274	0.115352	chr2	96814660		238465	plus	S
cg12927730	16150	0.00010623	0.045424	0.261731	chr2	97260774	KIAA1310;KIAA1310	238651	plus	S
cg25095518	16204	0.000110421	0.0465654	0.298524	chr2	98329337	ZAP70	238888	plus	S
cg03310038	16237	9.30919e-05	0.0428879	0.115577	chr2	98852704	VWA3B	239001	plus	S
cg23193657	16548	8.97554e-05	0.0418913	0.029861	chr2	103233395		239758	plus	S
cg14475035	16883	4.38112e-05	0.0275237	0.0963909	chr2	111883501	BCL2L11;BCL2L11;BCL2L11	240689	plus	S
cg22662649	17525	2.16064e-05	0.0169348	0.0219571	chr2	128848570	UGGT1;UGGT1	242633	plus	S
cg25392146	17883	4.19779e-05	0.0266312	0.0429808	chr2	136011030	ZRANB3	243519	plus	S
cg26847109	17993	8.76082e-06	0.00900392	0.0733129	chr2	141821182	LRP1B	243768	plus	S
cg27003571	18069	7.56783e-05	0.0378353	0.0335061	chr2	145051829	GTDC1;GTDC1	243876	plus	S
cg09479286	18883	0.000106043	0.045424	0.439488	chr2	169659182	NOSTRIN;NOSTRIN;NOSTRIN;NOSTRIN;NOSTRIN	245658	plus	S
cg20342255	19147	3.31172e-06	0.00460691	0.155867	chr2	174836197		246481	plus	S
cg14528756	19241	2.57378e-05	0.0192608	0.0504327	chr2	176862893	KIAA1715	246793	plus	S
cg02694990	19814	0.00012783	0.0498813	0.0650529	chr2	197001634	STK17B	248556	plus	S
cg14755054	20029	1.73634e-05	0.0147025	0.134942	chr2	201940010	NDUFB3	249206	plus	S
cg06629337	20383	6.71541e-06	0.00751242	0.0253554	chr2	208424151	CREB1;CREB1	250046	plus	S
cg00903438	20402	0.000100732	0.0444024	0.0489888	chr2	208756199	PLEKHM3	250124	plus	S
cg12346504	20547	7.40551e-05	0.0373287	0.0320825	chr2	214148862	SPAG16;SPAG16	250478	plus	S
cg01372071	20547	8.83927e-06	0.00903876	0.0623867	chr2	214149425	SPAG16;SPAG16	250486	plus	S
cg07532758	21292	3.57215e-05	0.0239735	0.05739	chr2	230583517		252800	plus	S
cg25502245	21348	3.0289e-09	1.17761e-05	0.0245205	chr2	231754837		252964	plus	S
cg18755404	21721	4.71104e-05	0.0287942	0.0278578	chr2	236765874	AGAP1;AGAP1	254238	plus	S
cg14380745	21967	9.82975e-05	0.0437798	0.0651189	chr2	239342363	ASB1	255092	plus	S
cg27637086	22085	4.59122e-05	0.0283858	0.0292329	chr2	240425955		255661	plus	S
cg03244587	22298	1.05679e-07	0.000266346	0.0692711	chr2	242663548	ING5	256753	plus	S
cg05136169	114944	2.88675e-05	0.0207524	0.179447	chr20	3065473	AVP	257963	plus	S
cg25359645	115404	2.54143e-06	0.00371635	0.119523	chr20	30134929	HM13;HM13;HM13;PSIMCT-1	260179	plus	S
cg03161787	115407	5.10452e-05	0.0301201	0.025373	chr20	30174425		260196	plus	S
cg20891842	115718	5.83854e-06	0.00688479	0.185526	chr20	36041285		261660	plus	S
cg01703601	115749	4.82902e-05	0.0292235	0.0308008	chr20	37054159	LOC388796;LOC388796;SNORA71B	261878	plus	S
cg06493829	115796	0.000120351	0.0483811	0.0790973	chr20	39766765	PLCG1;PLCG1	262159	plus	S
cg15286784	116080	6.22593e-11	3.75709e-07	0.0386547	chr20	47895175	C20orf199;SNORD12C;C20orf199;C20orf199;ZNFX1	263540	plus	S
cg09241929	116325	2.07517e-05	0.0164395	0.0218062	chr20	57465560	GNAS;GNAS;GNAS;GNAS;GNAS;GNAS;GNAS;GNAS	264764	plus	S
cg05974269	116328	7.08151e-05	0.0363803	0.0321345	chr20	57485819	GNAS;GNAS;GNAS;GNAS;GNAS;GNAS;GNAS;GNAS	264793	plus	S
cg06943251	116340	4.33907e-06	0.00556617	0.0314706	chr20	57615398	SLMO2	264866	plus	S
cg01227027	116487	4.93663e-05	0.0296652	0.00830248	chr20	61430899	C20orf20	265605	plus	S
cg21387281	116488	0.000102428	0.044464	0.169373	chr20	61435439	OGFR	265608	plus	S
cg13887016	116489	0.000128139	0.0498902	0.00880161	chr20	61443577	OGFR	265623	plus	S
cg22066321	116500	6.83645e-10	3.25458e-06	0.00794363	chr20	61542198	DIDO1;DIDO1;DIDO1;DIDO1	265716	plus	S
cg24917883	116758	4.80388e-05	0.0291663	0.0359326	chr21	30254255	N6AMT1;N6AMT1	267105	plus	S
cg18496653	117013	2.2978e-06	0.00343457	0.0339809	chr21	38593042		268225	plus	S
cg12089511	117101	1.9694e-05	0.0159508	0.0401257	chr21	42025596	DSCAM	268540	plus	S
cg22102703	117160	8.46863e-05	0.0405635	0.18335	chr21	43346284	C2CD2;C2CD2	268801	plus	S
cg13066546	117351	1.59426e-06	0.0025393	0.0592392	chr21	46046042	C21orf29;KRTAP10-9	269710	plus	S
cg20604021	117372	9.78538e-05	0.043673	0.0647697	chr21	46271020	PTTG1IP	269789	plus	S
cg15349559	117400	5.03111e-05	0.0298975	0.0987395	chr21	46499349	ADARB1;ADARB1;ADARB1;ADARB1;ADARB1;ADARB1;ADARB1	269941	plus	S
cg11766577	117499	4.20175e-05	0.0266312	0.327565	chr21	47581405	C21orf56;C21orf56	270375	plus	S
cg13126279	117499	4.6264e-06	0.00579504	0.307995	chr21	47581558	C21orf56;C21orf56	270376	plus	S
cg21952012	117944	8.75377e-05	0.0412608	0.0272141	chr22	24954112	SNRPD3	272324	plus	S
cg15791438	118217	5.08213e-05	0.030078	0.263111	chr22	31893238	SFI1;SFI1	273521	plus	S
cg18333626	118243	1.01034e-05	0.00992859	0.119639	chr22	32572285		273635	plus	S
cg18271581	118270	1.68359e-06	0.00266178	0.0477766	chr22	34047559	LARGE;LARGE	273751	plus	S
cg08750053	118510	0.000127813	0.0498813	0.103426	chr22	38962607	DMC1	274781	plus	S
cg21564495	119027	0.000100345	0.0443231	0.211462	chr22	49023277	FAM19A5;FAM19A5	277243	plus	S
cg07031797	119115	4.15225e-05	0.0264708	0.312041	chr22	50483123	TTLL8	277632	plus	S
cg07624815	23021	7.49856e-05	0.0375327	0.0769841	chr3	14922656	FGD5	280329	plus	S
cg05586466	23188	6.1491e-05	0.033562	0.141655	chr3	18387801		280732	plus	S
cg07293188	23801	5.13674e-06	0.00620523	0.0422545	chr3	38209834	OXSR1	282318	plus	S
cg24296397	24544	5.47735e-05	0.031245	0.381314	chr3	49692537	BSN	285036	plus	S
cg18328933	24682	6.3063e-06	0.00722452	0.124824	chr3	52008538	ABHD14B;ABHD14B;ABHD14B;ABHD14A;ABHD14B;ABHD14B	285926	plus	S
cg07666579	24686	5.65073e-05	0.0315968	0.019552	chr3	52029773	RPL29	285952	plus	S
cg20685233	24686	1.9455e-05	0.0158739	0.0360376	chr3	52032075		285961	plus	S
cg24980696	24956	1.35486e-05	0.0123569	0.104661	chr3	56720960		286852	plus	S
cg27495109	25003	5.7544e-06	0.00682966	0.0302697	chr3	57541741	PDE12	286989	plus	S
cg21573947	25397	9.00179e-05	0.0419225	0.0899105	chr3	65619088	MAGI1;MAGI1;MAGI1	287868	plus	S
cg01881444	25525	2.85719e-05	0.0206091	0.0236526	chr3	69061575	C3orf64	288098	plus	S
cg15164782	26123	1.48457e-06	0.00240937	0.123024	chr3	99507048	COL8A1;MIR548G;COL8A1	289346	plus	S
cg23048036	26235	8.01019e-05	0.039308	0.10977	chr3	101442954	CEP97	289641	plus	S
cg16758764	26612	2.92136e-07	0.000616589	0.173728	chr3	113529180	ATP6V1A	290524	plus	S
cg01697763	26944	7.74292e-05	0.0385418	0.0342326	chr3	122253369	PARP9;PARP9;PARP9;PARP9;PARP9;PARP9	291385	plus	S
cg18670350	27167	7.96138e-05	0.0391631	0.0310316	chr3	125258584	OSBPL11	291928	plus	S
cg07081887	27443	3.08137e-09	1.17878e-05	0.337584	chr3	128880349	ISY1	292938	plus	S
cg26713384	27494	2.15905e-08	6.80189e-05	0.0634693	chr3	129376466	TMCC1;TMCC1;TMCC1	293147	plus	S
cg10256790	27659	7.77591e-06	0.00834266	0.191514	chr3	133618896		293606	plus	S
cg12657361	27995	6.60096e-05	0.034563	0.0238027	chr3	141161911	ZBTB38	294673	plus	S
cg05796845	28390	8.89716e-06	0.00906004	0.100795	chr3	152058795	MBNL1;MBNL1;MBNL1;MBNL1;MBNL1;MBNL1;MBNL1;TMEM14E	295843	plus	S
cg02960488	29192	3.10979e-06	0.00439738	0.115715	chr3	178863507		297817	plus	S
cg18555199	29265	6.64435e-08	0.000176821	0.0541839	chr3	180630509	FXR1;FXR1;FXR1;FXR1	298036	plus	S
cg01804351	29379	0.000123668	0.0490883	0.0541762	chr3	183351769		298382	plus	S
cg15701237	29656	0.000108197	0.0458987	0.055819	chr3	187086154	RTP4	299382	plus	S
cg21176488	29732	1.67339e-06	0.00265545	0.0481167	chr3	188251742	LPP;LPP;LPP	299568	plus	S
cg01239666	30108	5.71589e-08	0.000155	0.017616	chr3	195601381	TNK2;TNK2	300586	plus	S
cg14229433	30326	3.02209e-07	0.000628559	0.108415	chr4	722207	PCGF3	301563	plus	S
cg03307425	30347	8.5202e-06	0.00881771	0.0106855	chr4	866811	GAK	301768	plus	S
cg03623394	30357	3.91055e-10	1.99464e-06	0.119778	chr4	1005876	FGFRL1;FGFRL1;FGFRL1	302034	plus	S
cg01638225	30382	6.09402e-06	0.00709837	0.0117357	chr4	1202930	LOC100130872;LOC100130872-SPON2	302221	plus	S
cg22795583	30382	0.000108077	0.0458931	0.015913	chr4	1224709	CTBP1;CTBP1	302281	plus	S
cg01480205	30383	5.03268e-06	0.0061608	0.0207628	chr4	1256213		302339	plus	S
cg14899145	30395	8.82882e-05	0.0414777	0.0248571	chr4	1333483	MAEA;MAEA	302421	plus	S
cg13883590	30465	3.38044e-05	0.0231739	0.0160235	chr4	1952852	WHSC1;WHSC1;WHSC1;WHSC1	302994	plus	S
cg24599270	30604	3.72185e-05	0.0246087	0.0407734	chr4	3409017	RGS12;RGS12;RGS12	303763	plus	S
cg16828491	31026	0.000124132	0.0491394	0.221082	chr4	8230829	SH3TC1	305583	plus	S
cg21371900	31239	1.16321e-05	0.0111247	0.03372	chr4	14870443		306266	plus	S
cg12373898	31278	3.50643e-06	0.00478456	0.0504385	chr4	15686426	LOC285550	306370	plus	S
cg12073319	31293	6.26595e-05	0.0338046	0.110708	chr4	15965025	FGFBP2	306421	plus	S
cg19719391	31674	0.000102259	0.044464	0.168969	chr4	26789915		307278	plus	S
cg22863802	31869	2.92521e-09	1.14984e-05	0.043106	chr4	39482134	LOC401127	307782	plus	S
cg05172394	32214	0.000119758	0.0483281	0.0286987	chr4	54233429	SCFD2	308914	plus	S
cg01022951	33526	2.15852e-05	0.0169348	0.0192724	chr4	100815818	MAPKSP1;MAPKSP1	312427	plus	S
cg04605316	33610	7.11274e-05	0.0364533	0.0419421	chr4	103686232		312618	plus	S
cg03722396	33829	1.35647e-11	1.00205e-07	0.53206	chr4	111537907		313284	plus	S
cg18837542	34458	3.98194e-09	1.47076e-05	0.0488168	chr4	139610152		314839	plus	S
cg21834908	34502	0.0001223	0.0488809	0.0465197	chr4	140289458	NAA15	314971	plus	S
cg14257519	34600	6.72484e-05	0.0350097	0.122564	chr4	141797676	RNF150	315254	plus	S
cg02884773	34719	6.31813e-05	0.0338445	0.0430137	chr4	146446271	SMAD1;SMAD1	315557	plus	S
cg01597632	34767	5.31705e-05	0.030655	0.0246671	chr4	147443489	SLC10A7;SLC10A7	315684	plus	S
cg08219218	34878	1.38302e-05	0.012581	0.0520879	chr4	151503501	LRBA;MAB21L2;MAB21L2	315940	plus	S
cg21845400	35209	5.64193e-06	0.00673347	0.124439	chr4	160098011		316858	plus	S
cg26927939	35419	1.46668e-05	0.0129836	0.0733359	chr4	170679646	C4orf27	317407	plus	S
cg05819912	35432	9.33412e-05	0.0429105	0.0486423	chr4	170945459	MFAP3L	317436	plus	S
cg03205844	35818	8.21327e-05	0.039853	0.0437349	chr4	185400068		318574	plus	S
cg16325394	36207	2.90627e-08	8.70777e-05	0.0220061	chr5	422633	AHRR	319831	plus	S
cg20974424	36233	4.504e-06	0.00569187	0.0181514	chr5	640382	CEP72	320116	plus	S
cg07367113	36257	0.000107368	0.0456828	0.0258948	chr5	891207	BRD9;BRD9;BRD9	320245	plus	S
cg04248937	36291	0.000103874	0.0449549	0.364675	chr5	1222847	SLC6A19	320675	plus	S
cg17268070	36349	9.38552e-05	0.0430073	0.0246026	chr5	1672018		321179	plus	S
cg05585513	36494	1.24253e-06	0.0021171	0.0122851	chr5	3454438		321974	plus	S
cg06434454	36557	1.14246e-07	0.000286254	0.0177995	chr5	5146320	ADAMTS16	322202	plus	S
cg25579867	36788	1.76537e-07	0.000404484	0.0610158	chr5	10647125	ANKRD33B	322803	plus	S
cg15143268	36929	6.63616e-06	0.0074432	0.0446068	chr5	14405920	TRIO	323047	plus	S
cg16380885	37069	1.15369e-05	0.0110831	0.0833849	chr5	17219936	BASP1	323414	plus	S
cg04981722	37625	3.56773e-05	0.0239735	0.042154	chr5	41870862	OXCT1	324747	plus	S
cg04441453	37627	8.96061e-05	0.0418673	0.04388	chr5	41902083		324755	plus	S
cg00955895	37673	2.74854e-06	0.00393855	0.0841705	chr5	43190083		324981	plus	S
cg12401625	37813	9.44866e-05	0.0430073	0.0224006	chr5	53281666	ARL15	325423	plus	S
cg16683416	37875	1.52588e-05	0.0133696	0.101056	chr5	54283267		325537	plus	S
cg05507305	38000	1.45785e-05	0.0129478	0.0188023	chr5	56208718	C5orf35	325880	plus	S
cg18611813	38111	0.00010145	0.0444447	0.12623	chr5	59782121	PDE4D;PART1	326101	plus	S
cg15404040	38155	5.56651e-05	0.0312993	0.025847	chr5	60706045	ZSWIM6	326229	plus	S
cg11646762	38382	2.01255e-05	0.0162084	0.238189	chr5	68180149		326760	plus	S
cg26556492	38389	2.59385e-05	0.0192608	0.12249	chr5	68431589		326780	plus	S
cg13647309	38392	0.000123736	0.0490883	0.0539943	chr5	68473620	CCNB1	326792	plus	S
cg10879958	38407	1.35403e-05	0.0123569	0.205052	chr5	68708084	RAD17;RAD17;RAD17;RAD17;RAD17;RAD17;RAD17;RAD17	326869	plus	S
cg04988443	38506	5.02098e-05	0.0298788	0.174431	chr5	72126118	TNPO1	327103	plus	S
cg10520799	38552	1.51429e-07	0.000354546	0.0718051	chr5	72784272		327307	plus	S
cg24848608	38624	2.73659e-06	0.0039346	0.0508748	chr5	74353010		327498	plus	S
cg24992339	38697	6.48407e-05	0.0342135	0.0872774	chr5	76238976		327719	plus	S
cg06573795	38701	5.56241e-05	0.0312993	0.11039	chr5	76328997	AGGF1	327745	plus	S
cg26964651	38783	4.87714e-05	0.0293489	0.100589	chr5	77949077		328025	plus	S
cg22455949	38837	1.24397e-06	0.0021171	0.0655025	chr5	79095591	CMYA5	328158	plus	S
cg19606356	39050	3.97316e-05	0.0257149	0.0884004	chr5	86563843	RASA1;RASA1	328655	plus	S
cg26911243	39386	2.49377e-08	7.63193e-05	0.134647	chr5	96401915		329602	plus	S
cg13320626	39451	0.000104845	0.0451927	0.0164324	chr5	100238655	ST8SIA4;ST8SIA4	329747	plus	S
cg06483441	39478	2.67687e-05	0.0197745	0.0813478	chr5	102442571	GIN1	329834	plus	S
cg11266863	39862	0.000110926	0.046576	0.055334	chr5	115599680	COMMD10	330783	plus	S
cg03820120	39875	3.88086e-05	0.0253132	0.0231571	chr5	115864207	SEMA6A	330810	plus	S
cg22765025	40127	6.61355e-06	0.00743731	0.0491113	chr5	124144945		331388	plus	S
cg16457489	40223	1.3329e-06	0.00222213	0.149714	chr5	126345185	MARCH3	331552	plus	S
cg08450941	40425	0.00011187	0.0467334	0.0447142	chr5	132072371	KIF3A	332145	plus	S
cg18115658	40816	0.000117446	0.0479384	0.185167	chr5	138720490	SLC23A1;SLC23A1	333569	plus	S
cg06664433	40849	4.06839e-06	0.00533902	0.120456	chr5	139077178		333744	plus	S
cg09529600	41355	5.00398e-07	0.000974539	0.162422	chr5	147651477	SPINK5L3	335743	plus	S
cg19667623	41471	1.78631e-05	0.0149192	0.0141606	chr5	149380025	HMGXB3;TIGD6	336051	plus	S
cg19038160	41570	1.30153e-05	0.0120183	0.113215	chr5	150329882		336425	plus	S
cg21072457	41639	6.30231e-05	0.0338422	0.0378597	chr5	151192481		336626	plus	S
cg18015622	41939	5.20429e-05	0.0304445	0.0293312	chr5	158893353	LOC285627	337404	plus	S
cg09574618	42000	1.57439e-05	0.0136827	0.0884937	chr5	159797762	C1QTNF2	337538	plus	S
cg17543425	42137	1.71249e-07	0.000394477	0.0948148	chr5	167181519	ODZ2	337870	plus	S
cg00615414	42141	1.76841e-08	5.69688e-05	0.0525236	chr5	167284031	ODZ2	337877	plus	S
cg26407324	42384	0.00011191	0.0467334	0.0629307	chr5	171686436	UBTD2	338526	plus	S
cg15414042	42434	4.9801e-05	0.0297421	0.0141794	chr5	172198979	DUSP1	338695	plus	S
cg08386832	42472	8.40204e-05	0.040403	0.0318423	chr5	172482807	C5orf41;C5orf41;C5orf41	338812	plus	S
cg25663304	42697	9.42234e-05	0.0430073	0.18552	chr5	176172918		339636	plus	S
cg09663237	43037	3.40889e-09	1.29253e-05	0.0440582	chr5	179660783	MAPK9;MAPK9;MAPK9;MAPK9	341112	plus	S
cg17632375	43173	3.22155e-06	0.00452555	0.0434092	chr6	533904	EXOC2	341758	plus	S
cg23978473	43404	2.51669e-05	0.0189507	0.0634957	chr6	3387815	SLC22A23;SLC22A23	342604	plus	S
cg13101072	43448	8.47329e-05	0.0405635	0.0987183	chr6	3849818	FAM50B	342745	plus	S
cg12787036	43523	8.83933e-07	0.001598	0.103886	chr6	4931093	CDYL;CDYL;CDYL;CDYL	342915	plus	S
cg15580869	43703	1.98753e-06	0.00307425	0.0598267	chr6	8099455	EEF1E1;EEF1E1	343482	plus	S
cg00560724	43779	2.9384e-05	0.020948	0.0348598	chr6	10626970	GCNT2;GCNT2;GCNT2	343772	plus	S
cg06526693	44338	1.17972e-05	0.0111827	0.0431349	chr6	19805277		345022	plus	S
cg05848045	44429	3.00351e-08	8.93661e-05	0.0855954	chr6	21770733	FLJ22536	345223	plus	S
cg20426364	44449	0.000128202	0.0498902	0.0390488	chr6	22035909	FLJ22536	345245	plus	S
cg17688460	44577	0.000101778	0.044452	0.138433	chr6	25143214		345550	plus	S
cg08054907	44638	0.000120067	0.0483489	0.0586683	chr6	26019358	HIST1H1A;HIST1H3A	345715	plus	S
cg01269795	44691	0.000116249	0.0476291	0.14856	chr6	26440101	BTN3A3;BTN3A3	346097	plus	S
cg04012027	44797	9.88308e-06	0.00975979	0.120802	chr6	27670844		346606	plus	S
cg08464208	44807	8.42393e-05	0.0404507	0.00660829	chr6	27792307		346658	plus	S
cg11839333	44905	5.74922e-05	0.0320324	0.0621251	chr6	28753834		347348	plus	S
cg19760323	44975	0	0	0.126128	chr6	29716554	LOC285830;LOC285830	348447	plus	S
cg05664039	45010	5.36728e-05	0.0308677	0.00726247	chr6	30131755	TRIM15	349268	plus	S
cg04651621	45020	1.76481e-05	0.0148735	0.093972	chr6	30292292	HCG18;HCG18	349583	plus	S
cg08843660	45020	2.02941e-05	0.0163108	0.036744	chr6	30311967	RPP21	349715	plus	S
cg13542073	45042	8.63521e-05	0.0409724	0.0332064	chr6	30594186	C6orf134	350197	plus	S
cg01413582	45049	3.18489e-05	0.0221719	0.024404	chr6	30652688	KIAA1949;KIAA1949	350405	plus	S
cg27611005	45119	1.4406e-05	0.0128859	0.0346055	chr6	31511014	BAT1;BAT1	351707	plus	S
cg03077969	45121	4.24541e-06	0.00549539	0.225983	chr6	31522510	NFKBIL1;NFKBIL1;NFKBIL1;NFKBIL1	351746	plus	S
cg06518831	45133	3.86513e-06	0.00512706	0.0710867	chr6	31632541	BAT4;CSNK2B	352220	plus	S
cg07732471	45133	1.48632e-07	0.000351835	0.0671874	chr6	31635946	CSNK2B	352279	plus	S
cg06362354	45135	4.49665e-05	0.0280032	0.0722746	chr6	31672483	BAT5	352438	plus	S
cg09832108	45152	6.88472e-05	0.0356687	0.0386232	chr6	31862925	EHMT2;EHMT2	353322	plus	S
cg00721819	45168	2.04429e-05	0.0163108	0.0256748	chr6	32016520	TNXB	353708	plus	S
cg10667207	45168	9.68612e-05	0.0435019	0.0258529	chr6	32035188	TNXB	353787	plus	S
cg12302217	45169	0.000108654	0.0460265	0.0430694	chr6	32085149	ATF6B;ATF6B	354133	plus	S
cg14739153	45171	1.79596e-06	0.00279814	0.103172	chr6	32142122	AGPAT1;AGPAT1	354507	plus	S
cg19136673	45219	7.20793e-05	0.0367215	0.278074	chr6	32813337	PSMB8;TAP1	355386	plus	S
cg00225157	45240	6.00301e-05	0.0328903	0.103365	chr6	33173038	HSD17B8	356414	plus	S
cg02835481	45245	3.59388e-07	0.000733247	0.0946532	chr6	33226648	VPS52	356594	plus	S
cg03734967	45245	0.000106214	0.045424	0.0168092	chr6	33233548	VPS52	356621	plus	S
cg04971742	45245	0.000111877	0.0467334	0.028059	chr6	33238093	VPS52	356655	plus	S
cg05620050	45254	8.90238e-06	0.00906004	0.0360314	chr6	33374613	KIFC1	357343	plus	S
cg26472089	45506	1.47139e-05	0.0129985	0.136555	chr6	36033207	MAPK14;MAPK14;MAPK14;MAPK14	358549	plus	S
cg21229337	45600	3.23044e-05	0.0223965	0.168393	chr6	36931543	PI16	358818	plus	S
cg00374492	45949	4.14062e-06	0.00539232	0.101296	chr6	42015867	CCND3;CCND3	359875	plus	S
cg27158341	46510	6.16253e-05	0.0335925	0.044652	chr6	52959510	FBXO9;FBXO9;FBXO9	361763	plus	S
cg06113208	46889	5.31784e-05	0.030655	0.0736739	chr6	73328305		362636	plus	S
cg16623943	47061	2.4696e-05	0.0186288	0.11956	chr6	80251197		363161	plus	S
cg08836825	47110	7.09807e-05	0.0364217	0.0581514	chr6	82726757		363283	plus	S
cg26477387	47234	4.56662e-05	0.0282745	0.070894	chr6	87973166	ZNF292	363707	plus	S
cg05280932	47240	0.000101238	0.0444427	0.112315	chr6	88045306	C6orf162;C6orf162	363725	plus	S
cg11523221	47372	3.75869e-05	0.0248141	0.0696238	chr6	90905332	BACH2;BACH2	364101	plus	S
cg16734734	47636	0.00012135	0.0486371	0.0507499	chr6	105624309	POPDC3;POPDC3	364953	plus	S
cg08191490	48034	1.92824e-05	0.0157665	0.136111	chr6	112546178	LAMA4;LAMA4;LAMA4	366093	plus	S
cg16946271	48265	1.91595e-05	0.015726	0.0885004	chr6	119666271	MAN1A1	366701	plus	S
cg10472759	48312	3.98213e-08	0.000112991	0.0430399	chr6	122793075	PKIB;PKIB;SERINC1	366804	plus	S
cg17381305	48669	4.84045e-05	0.0292514	0.0721507	chr6	133226489		367691	plus	S
cg07437607	48720	8.95372e-05	0.0418673	0.0272964	chr6	134270138		367846	plus	S
cg01985595	48843	1.56996e-07	0.000365576	0.111666	chr6	136479501	PDE7B	368104	plus	S
cg25412230	49245	8.08707e-05	0.0394193	0.0449242	chr6	145385313		369160	plus	S
cg21973687	49319	0.00011488	0.0474476	0.0267932	chr6	148142629		369369	plus	S
cg02744937	50027	7.47997e-05	0.0375274	0.0383527	chr6	160426265	IGF2R	371285	plus	S
cg23565166	50662	1.78034e-05	0.0149192	0.0628283	chr6	170042028	WDR27	373645	plus	S
cg23667602	50835	2.57933e-05	0.0192608	0.20576	chr7	960528	ADAP1	375058	plus	S
cg17681527	50941	3.09704e-07	0.000637954	0.156608	chr7	1793077		376318	plus	S
cg13827584	50941	2.3456e-09	9.48101e-06	0.276238	chr7	1793099		376319	plus	S
cg18207308	50967	7.26851e-05	0.0369146	0.0273645	chr7	2018435	MAD1L1;MAD1L1;MAD1L1	376622	plus	S
cg09723161	51038	1.03552e-05	0.0101527	0.170134	chr7	2563909	LFNG;LFNG;LFNG;LFNG	377230	plus	S
cg02613295	51038	1.03945e-05	0.010168	0.108891	chr7	2564256	LFNG;LFNG;LFNG;LFNG	377231	plus	S
cg12964881	51044	4.45584e-05	0.0278299	0.0351982	chr7	2611301	IQCE;IQCE	377297	plus	S
cg00119896	51100	3.02708e-05	0.021473	0.0891224	chr7	3083721	CARD11	377685	plus	S
cg13008538	51100	6.26955e-05	0.0338046	0.227283	chr7	3083741	CARD11	377686	plus	S
cg18961281	51100	4.97512e-05	0.0297421	0.165034	chr7	3083773	CARD11	377687	plus	S
cg26173562	51245	0.000127695	0.0498813	0.0245378	chr7	5253757	WIPI2;WIPI2;WIPI2;WIPI2;WIPI2	378459	plus	S
cg25692633	51323	2.20798e-05	0.0172004	0.0322109	chr7	6209226	CYTH3	378948	plus	S
cg15466977	51379	0.000101721	0.044452	0.0261669	chr7	6728225	ZNF12;ZNF12	379189	plus	S
cg09574499	52029	0.000119582	0.0483281	0.0349483	chr7	27168962	HOXA4	381141	plus	S
cg17988320	52237	5.77541e-05	0.032121	0.333629	chr7	30361459	ZNRF2	382060	plus	S
cg06206957	52380	1.61311e-07	0.000373593	0.0574002	chr7	33080615	NT5C3;NT5C3;NT5C3;NT5C3	382454	plus	S
cg22856792	52453	4.86039e-08	0.000133491	0.0734899	chr7	34197360		382587	plus	S
cg05668926	52688	0.000101428	0.0444447	0.0445601	chr7	39609343	C7orf36	383192	plus	S
cg22509053	53062	8.62542e-05	0.0409724	0.0531993	chr7	46745061		384343	plus	S
cg04322486	53435	0.000124552	0.0491484	0.021507	chr7	55601226	VOPP1	385267	plus	S
cg19889934	53670	5.40181e-05	0.0309831	0.00653115	chr7	66022074	LOC493754	385980	plus	S
cg01459030	53940	0.000101048	0.0444375	0.0646347	chr7	73605490	MIR590;EIF4H;EIF4H	386730	plus	S
cg03930577	54104	1.79081e-06	0.00279814	0.118802	chr7	76749431		387278	plus	S
cg22988458	54811	0.000116935	0.0478525	0.0635056	chr7	98568687	TRRAP	389491	plus	S
cg23860451	54932	6.47154e-05	0.0342135	0.113239	chr7	99697496	MCM7;MCM7	390020	plus	S
cg06189038	54944	0.000127247	0.0498354	0.211439	chr7	99767134	GAL3ST4	390105	plus	S
cg08746986	55210	9.12934e-05	0.0423325	0.245694	chr7	103112392	RELN;RELN	391381	plus	S
cg24744500	55373	7.46921e-06	0.00810184	0.0177462	chr7	106508732	PIK3CG	391758	plus	S
cg23144649	55398	2.30063e-06	0.00343457	0.0436796	chr7	106874008	COG5;COG5;COG5	391808	plus	S
cg11997570	55474	6.60676e-05	0.034563	0.0138168	chr7	108211071	THAP5;THAP5;DNAJB9	392039	plus	S
ch.7.121610422F	55842	4.11148e-05	0.0264106	0.0135555	chr7	121823186		392858	plus	S
cg02554495	55846	2.92192e-05	0.0209001	0.104483	chr7	121942915	FEZF1;FEZF1	392874	plus	S
cg25021359	55896	1.35551e-05	0.0123569	0.101164	chr7	123315035		393020	plus	S
cg19877088	55972	0.000102144	0.044464	0.033066	chr7	127027475	ZNF800	393193	plus	S
cg14059988	56034	1.89624e-05	0.0156242	0.0204629	chr7	127669170	SND1;LRRC4	393330	plus	S
cg19344806	56239	6.3816e-05	0.0339959	0.0886007	chr7	130132298	MEST;MEST;MESTIT1;MEST	394167	plus	S
cg22328512	56485	2.74034e-05	0.0200252	0.0343414	chr7	134620341	CALD1;CALD1;CALD1;CALD1;CALD1	394707	plus	S
cg23396962	56802	9.87708e-05	0.0438084	0.0472898	chr7	140179920	MKRN1;MKRN1	395558	plus	S
cg00012469	56832	7.78858e-06	0.00834266	0.0522709	chr7	140771419		395669	plus	S
cg02351199	56925	0.000110974	0.046576	0.0286517	chr7	142724597	OR9A2	395947	plus	S
cg01270001	57163	8.12767e-06	0.0085143	0.0642907	chr7	150020401	LRRC61;ACTR3C;LRRC61;LRRC61;LRRC61	396757	plus	S
cg27131953	57232	2.18094e-07	0.000476753	0.0127041	chr7	150778881	FASTK;TMUB1;TMUB1;FASTK	397218	plus	S
cg02917064	57257	9.47713e-05	0.0430141	0.0604785	chr7	150974464	SMARCD3;SMARCD3	397420	plus	S
cg03914452	57473	1.14275e-05	0.0110026	0.044396	chr7	155464145	RBM33	398352	plus	S
cg12571978	57496	9.44806e-07	0.0016797	0.0679108	chr7	155636183		398465	plus	S
cg08010530	57618	0.000110849	0.046576	0.0156951	chr7	157200028	DNAJB6	399033	plus	S
cg26321613	57800	8.99341e-05	0.0419225	0.135476	chr7	158703554	WDR60	400439	plus	S
cg16619899	57910	9.47106e-05	0.0430141	0.0616087	chr8	915860		401069	plus	S
cg09899173	58012	4.04824e-06	0.0053369	0.0198629	chr8	1765336	MIR596	401783	plus	S
cg23328404	58784	3.95965e-10	1.99592e-06	0.581417	chr8	19539991	CSGALNACT1;CSGALNACT1;CSGALNACT1	404110	plus	S
cg21163717	58857	1.78324e-05	0.0149192	0.208752	chr8	21769903	DOK2	404293	plus	S
cg01596995	58875	1.57003e-06	0.00251004	0.0393508	chr8	21945084		404385	plus	S
cg07476353	59103	2.30626e-09	9.41077e-06	0.0831821	chr8	25279812	GNRH1;GNRH1	405267	plus	S
cg21707996	59708	0.000122976	0.049039	0.0325604	chr8	38647514	TACC1;TACC1;TACC1	407081	plus	S
cg07335376	60283	8.15307e-05	0.0396508	0.0518981	chr8	55047225	MRPL15	408694	plus	S
cg08923114	60353	7.63712e-06	0.00824224	0.114464	chr8	57030880		408930	plus	S
cg16867023	60368	9.52174e-05	0.043044	0.0286945	chr8	57361052		409011	plus	S
cg11390489	60532	1.90648e-08	6.05068e-05	0.0582725	chr8	62568172	ASPH;ASPH;ASPH;ASPH;ASPH;ASPH;ASPH;ASPH;ASPH	409422	plus	S
cg22813699	60812	4.22391e-08	0.000119063	0.0792718	chr8	71297531	NCOA2	410280	plus	S
cg08739896	61195	1.43963e-05	0.0128859	0.0186519	chr8	86840961	REXO1L2P	411389	plus	S
cg21642926	61918	1.18309e-07	0.000294709	0.158924	chr8	104154149	BAALC;BAALC;C8orf56	413268	plus	S
cg14230692	62139	5.39844e-07	0.00103722	0.0184982	chr8	112053356		413811	plus	S
cg18430465	62171	8.26423e-05	0.0399195	0.0797847	chr8	116422845	TRPS1	413888	plus	S
cg08781738	62228	4.43768e-06	0.00564199	0.070969	chr8	117876328	RAD21	413991	plus	S
cg01243251	62366	1.16311e-08	3.89331e-05	0.102171	chr8	120605270	ENPP2;ENPP2;ENPP2	414252	plus	S
cg20383526	62511	0.000123383	0.049039	0.241003	chr8	124423636		414667	plus	S
cg15149876	62616	9.19736e-05	0.0425558	0.0541089	chr8	125988915	ZNF572	414910	plus	S
cg15332359	62633	9.45555e-05	0.0430073	0.0491024	chr8	126217943	NSMCE2	414948	plus	S
cg01765152	62780	2.40254e-06	0.00356187	0.0485213	chr8	129005526	PVT1	415223	plus	S
cg17583432	62780	5.25251e-07	0.00101372	0.0906681	chr8	129005567	PVT1	415224	plus	S
cg05519436	62992	7.36564e-05	0.037254	0.0622566	chr8	133858872	PHF20L1	415603	plus	S
cg25020550	63003	8.07335e-05	0.0394193	0.259822	chr8	134028958	TG	415619	plus	S
cg14650175	63266	4.14877e-05	0.0264708	0.0241659	chr8	141545624	EIF2C2;EIF2C2	416281	plus	S
cg19867107	63331	4.98706e-05	0.0297421	0.123161	chr8	142255537		416645	plus	S
cg00441079	63554	6.94872e-06	0.00769308	0.0272854	chr8	144398384	TOP1MT	417786	plus	S
cg03405308	63620	2.545e-05	0.0190966	0.0540138	chr8	144924219	NRBP2	418442	plus	S
cg21250061	64296	3.46605e-05	0.023559	0.0329245	chr9	37463344	ZBTB5	421114	plus	S
cg02514559	64464	1.04025e-06	0.0018118	0.0635878	chr9	74675332	C9orf57	421486	plus	S
cg13475860	64588	1.9155e-05	0.015726	0.0299622	chr9	84371897		421765	plus	S
cg08996975	64610	1.78969e-08	5.72242e-05	0.0889231	chr9	86569098	C9orf64	421818	plus	S
cg12927772	64611	9.14376e-10	4.16776e-06	0.0720464	chr9	86571585	C9orf64;C9orf64	421821	plus	S
cg13912673	64611	6.14814e-05	0.033562	0.0305889	chr9	86571904	C9orf64	421823	plus	S
cg14327541	64613	0.000102364	0.044464	0.108195	chr9	86597173	RMI1	421839	plus	S
cg13651859	64761	9.76292e-05	0.0436181	0.10799	chr9	91926249	CKS2	422137	plus	S
cg14318680	64862	5.28206e-05	0.0305742	0.122532	chr9	95219836	CENPP;ASPN	422365	plus	S
cg14325779	65298	2.35299e-05	0.0179386	0.0279421	chr9	111230512		423484	plus	S
cg19275834	65662	7.74978e-05	0.0385418	0.0916174	chr9	124855809	TTLL11;TTLL11;TTLL11;TTLL11	424326	plus	S
cg14158053	65698	5.10005e-06	0.00619022	0.0279667	chr9	125675560	ZBTB6;ZBTB6	424445	plus	S
cg14560064	65698	9.72644e-09	3.30742e-05	0.0408213	chr9	125675653	ZBTB6	424447	plus	S
cg13856340	65791	1.39962e-05	0.0126782	0.211369	chr9	127888818	SCAI;SCAI	424725	plus	S
cg14011554	65818	1.39535e-05	0.0126663	0.064312	chr9	128657810	PBX3;PBX3;PBX3;PBX3	424800	plus	S
cg13894822	65899	0.00012656	0.0496117	0.0318141	chr9	130187322	ZNF79	425013	plus	S
cg13916261	66121	2.74067e-05	0.0200252	0.280883	chr9	132800969	FNBP1	425749	plus	S
cg13764516	66728	8.69887e-05	0.0410472	0.277672	chr9	139648911	LCN8	427666	plus	S
cg14145338	66728	3.11374e-05	0.0218347	0.255708	chr9	139649039	LCN8	427667	plus	S
cg14156842	66849	6.53386e-09	2.27599e-05	0.0142744	chr9	140611316	EHMT1;EHMT1	428351	plus	S

## Sheet: BWS12_hyper
row.names	regionID	Pvalue_M	AdjustedPvalue_M	Betadif	chr	pos	Genename	Index	direction	significance
cg22332100	132	2.48225e-05	0.0260806	0.00840377	chr1	2000508	PRKCZ	1620	plus	S
cg13071306	483	2.7126e-08	6.18205e-05	0.00771012	chr1	6314113	GPR153	4698	plus	S
cg04346228	1924	8.50905e-06	0.0104763	0.00516098	chr1	21927956	RAP1GAP;RAP1GAP;RAP1GAP	9615	plus	S
cg15692032	2119	9.44747e-06	0.0114995	0.0503398	chr1	24195098	FUCA1	10363	plus	S
cg16417374	2265	5.36596e-05	0.0490208	0.163152	chr1	26098310	MAN1C1	10873	plus	S
cg27175380	2954	2.86206e-05	0.0294775	0.140028	chr1	35446563		13772	plus	S
cg08748615	3286	3.99911e-11	1.43987e-07	0.0160449	chr1	39957298	BMP8A	14969	plus	S
cg00117825	4381	2.69903e-05	0.0279326	0.0708738	chr1	57004017	PPAP2B;PPAP2B	19005	plus	S
cg26796066	4924	1.44869e-10	4.59778e-07	0.058672	chr1	68519770		20366	plus	S
cg23730181	4961	2.14312e-06	0.00314462	0.0113061	chr1	70033739		20444	plus	S
cg27587661	6859	5.9183e-06	0.00763773	0.330631	chr1	149148312		26349	plus	S
cg23106045	6862	1.16664e-06	0.00187915	0.379483	chr1	149162430		26360	plus	S
cg00690400	8347	2.41504e-10	7.33856e-07	0.0636175	chr1	174992704	MRPS14	32301	plus	S
cg02367655	8452	3.04521e-07	0.000567276	0.249189	chr1	178064623	RASAL2;LOC100302401	32544	plus	S
cg13558971	9435	3.24721e-06	0.00453186	0.0381767	chr1	203597085	ATP2B4;ATP2B4	35318	plus	S
cg19087171	11165	3.24722e-08	7.28423e-05	0.03761	chr1	234819745		40675	plus	S
cg23237976	11276	2.71183e-12	1.24935e-08	0.00851687	chr1	236318493	GPR137B	40984	plus	S
cg16901788	11764	9.61786e-12	3.88757e-08	0.0560341	chr1	247373896		42263	plus	S
cg24375895	11764	1.0561e-06	0.00174706	0.017504	chr1	247374146		42266	plus	S
cg02773640	67371	1.5094e-06	0.0023689	0.076371	chr10	6135633	RBM17;RBM17	44666	plus	S
cg23087877	68048	4.19e-05	0.0403422	0.136806	chr10	22022646	MLLT10;MLLT10	46648	plus	S
cg06635715	68056	8.35667e-06	0.0103183	0.0669917	chr10	22249474	DNAJC1	46660	plus	S
cg03595924	70067	4.60111e-05	0.04346	0.0209973	chr10	75118103	TTC18	52173	plus	S
cg15747733	70787	8.95037e-07	0.00152118	0.114072	chr10	88850398	GLUD1	53946	plus	S
cg14855326	71618	5.42466e-05	0.0491379	0.157135	chr10	103246963	BTRC;BTRC	57001	plus	S
cg12858701	72162	2.42081e-05	0.0256068	0.0996595	chr10	114894792	TCF7L2;TCF7L2;TCF7L2;TCF7L2;TCF7L2;TCF7L2	58690	plus	S
cg09023091	72762	3.75114e-06	0.00511845	0.0502226	chr10	125923376		60605	plus	S
cg13275538	73213	5.69139e-06	0.00743447	0.0599768	chr10	132913255	TCERG1L	62260	plus	S
cg15376229	73535	4.79788e-07	0.000871049	0.0288322	chr11	592496	PHRF1	65298	plus	S
cg15889804	74079	5.08236e-05	0.0468293	0.0244135	chr11	6947647	ZNF215	69130	plus	S
cg17073076	74137	1.72897e-07	0.000338258	0.0765809	chr11	8036796		69312	plus	S
cg18527899	76474	7.24664e-08	0.000154471	0.0582201	chr11	62559545	TMEM223	76883	plus	S
cg03713592	77481	3.79202e-05	0.0374357	0.303948	chr11	72463424	ARAP1;ARAP1	82255	plus	S
cg11077225	78380	1.12675e-09	3.09463e-06	0.0420964	chr11	94300493	PIWIL4;PIWIL4	84768	plus	S
cg04443016	79642	3.00099e-05	0.0306871	0.0506981	chr11	121378959	SORL1	88485	plus	S
cg25720625	80765	1.57349e-05	0.0178352	0.0706481	chr12	2247784	CACNA1C;CACNA1C;CACNA1C;CACNA1C;CACNA1C;CACNA1C;CACNA1C;CACNA1C;CACNA1C;CACNA1C;CACNA1C;CACNA1C;CACNA1C;CACNA1C;CACNA1C;CACNA1C;CACNA1C;CACNA1C;CACNA1C;CACNA1C;CACNA1C;CACNA1C;CACNA1C	91761	plus	S
cg27493301	82396	2.60934e-05	0.0271356	0.0118813	chr12	42982929	PRICKLE1	96653	plus	S
cg16041660	82396	0	0	0.0895665	chr12	42983360	PRICKLE1;PRICKLE1	96654	plus	S
cg16087447	82396	7.09033e-12	3.00781e-08	0.0954364	chr12	42983805	PRICKLE1	96655	plus	S
cg03149699	82396	7.88599e-07	0.00136793	0.0258996	chr12	42984093	PRICKLE1	96656	plus	S
cg20645074	82678	5.01471e-06	0.00669338	0.0715047	chr12	49182479	ADCY6	97464	plus	S
cg23697546	83164	5.79927e-11	2.0201e-07	0.0881052	chr12	54424085	HOXC4;HOXC5;HOXC6;HOXC6	99788	plus	S
cg13826247	83164	8.09858e-06	0.0100576	0.312222	chr12	54424203	HOXC4;HOXC5;HOXC6;HOXC6	99789	plus	S
cg22424835	83751	4.75069e-05	0.0444065	0.0133613	chr12	66524618	LLPH	102215	plus	S
cg27481639	83751	3.41638e-05	0.0341204	0.0152019	chr12	66524651	LLPH	102216	plus	S
cg05769889	84395	4.0958e-06	0.00555337	0.0372993	chr12	89744701	DUSP6;DUSP6	103734	plus	S
cg05768824	86696	2.59405e-05	0.0270421	0.0708178	chr12	130645000		111301	plus	S
cg09887007	87571	1.84675e-05	0.0202366	0.0127893	chr13	29069503	FLT1;FLT1;FLT1;FLT1	115327	plus	S
cg17312277	87697	2.6422e-11	9.75916e-08	0.00930434	chr13	31306018		115656	plus	S
cg19465159	90212	2.12159e-06	0.00314462	0.0317351	chr13	112631672		122431	plus	S
cg13427402	90316	4.37798e-06	0.00591725	0.0547898	chr13	113669884	MCF2L;MCF2L	123397	plus	S
cg02034328	92907	1.41812e-07	0.000282606	0.0661103	chr14	77968467		132371	plus	S
cg04773268	94936	7.28315e-09	1.77301e-05	0.0661042	chr15	31380908	TRPM1	139744	plus	S
cg20370788	95559	2.62358e-09	6.85418e-06	0.0812794	chr15	43215648		141785	plus	S
cg11431346	95686	9.80224e-06	0.0118639	0.0270985	chr15	45670478	GATM;LOC145663	142302	plus	S
cg17268483	95873	5.76991e-06	0.00749135	0.0360423	chr15	50477521	SLC27A2;SLC27A2	142765	plus	S
cg02764438	96155	4.73035e-06	0.00635342	0.0687275	chr15	57671034	CGNL1	143589	plus	S
cg18980554	97044	2.39774e-10	7.33801e-07	0.00989118	chr15	70233856		145990	plus	S
cg11869499	98248	2.11284e-05	0.0226881	0.352926	chr15	89872984	POLG;POLG	149533	plus	S
cg25709679	98691	3.9956e-05	0.0388194	0.12165	chr15	99206764	IGF1R	151137	plus	S
cg01383203	99083	4.47496e-05	0.0426071	0.105057	chr16	1220524	CACNA1H;CACNA1H	153548	plus	S
cg08333708	99225	2.02992e-06	0.00303042	0.0117411	chr16	2535757	TBC1D24	155192	plus	S
cg05371498	99765	5.03397e-05	0.0465838	0.0286224	chr16	10989530	CIITA	157390	plus	S
cg08129848	100746	0	0	0.0747606	chr16	30456761	SEPHS2	160370	plus	S
cg09973852	100746	5.97522e-12	2.58597e-08	0.0339427	chr16	30456960	SEPHS2	160371	plus	S
cg04789385	102375	1.0847e-05	0.0129095	0.00588937	chr16	75182570	ZFP1	166142	plus	S
cg06701800	102823	1.1013e-05	0.0129634	0.0536781	chr16	84600468	COTL1	167379	plus	S
cg27158386	102988	1.18314e-05	0.013775	0.00561998	chr16	85688445	KIAA0182;KIAA0182	168107	plus	S
cg06225923	103381	2.17693e-12	1.02496e-08	0.0141267	chr16	88797506	FAM38A	170013	plus	S
cg02010324	103396	6.75561e-07	0.00119114	0.010567	chr16	88917178	GALNS	170181	plus	S
cg01910494	103421	5.10531e-09	1.26439e-05	0.0046847	chr16	89139320		170509	plus	S
cg16746620	103426	1.09347e-06	0.00179504	0.0619015	chr16	89178589	ACSF3;ACSF3;ACSF3	170589	plus	S
cg01323098	103439	1.90718e-07	0.000369747	0.0424325	chr16	89271303		170696	plus	S
cg03839776	104310	9.88321e-13	5.16404e-09	0.010337	chr17	7750866	KDM6B	175507	plus	S
cg24770158	104368	4.92372e-05	0.045677	0.0964079	chr17	8241765	ODF4	175964	plus	S
cg13021479	104386	6.54819e-10	1.85802e-06	0.0155784	chr17	8380298	MYH10	176046	plus	S
cg25054581	104575	2.13653e-06	0.00314462	0.0742119	chr17	11927137	MAP2K4	176661	plus	S
cg15742818	105234	3.66532e-06	0.0050328	0.0351965	chr17	25913455	KSR1	178702	plus	S
cg01805124	105569	2.91979e-06	0.00415614	0.023483	chr17	30814031	CDK5R1	179977	plus	S
cg05440824	105634	4.20978e-05	0.0404417	0.0847385	chr17	32581035	CCL2	180129	plus	S
cg13133420	109660	6.0003e-07	0.00107119	0.0137548	chr18	21718863	CABYR;CABYR;CABYR;CABYR;CABYR;CABYR	198591	plus	S
cg03638874	109660	8.42305e-08	0.000177778	0.0160402	chr18	21718887	CABYR;CABYR;CABYR;CABYR;CABYR;CABYR	198592	plus	S
cg24928995	109660	1.18679e-07	0.000242136	0.0187254	chr18	21718893	CABYR;CABYR;CABYR;CABYR;CABYR;CABYR	198593	plus	S
cg24447438	109660	2.13256e-06	0.00314462	0.0171391	chr18	21718979	CABYR;CABYR;CABYR;CABYR;CABYR;CABYR;CABYR;CABYR;CABYR;CABYR;CABYR	198596	plus	S
cg14416559	109660	2.55149e-08	5.84598e-05	0.0444345	chr18	21719381	CABYR;CABYR;CABYR;CABYR;CABYR;CABYR	198600	plus	S
cg17789102	109952	2.1646e-05	0.023128	0.176313	chr18	45688478		199863	plus	S
cg27436190	110320	3.31561e-07	0.000607089	0.00823383	chr18	74633766	ZNF236	201488	plus	S
cg25786273	110332	1.4257e-05	0.0163328	0.13475	chr18	74801026	MBP;MBP	201537	plus	S
cg11566895	111073	1.97768e-07	0.000379976	0.0876958	chr19	4472531	HDGF2;HDGF2	206182	plus	S
cg06858150	111376	6.39636e-09	1.57503e-05	0.010188	chr19	7977647	MAP2K7	207835	plus	S
cg07679834	112421	3.30299e-06	0.00459474	0.132819	chr19	19841125	ZNF14	213524	plus	S
cg00731661	112606	1.24338e-07	0.000252481	0.0509514	chr19	32718883		214193	plus	S
cg18880319	113942	1.10225e-05	0.0129634	0.00613831	chr19	50180436	PRMT1;PRMT1;PRMT1	221394	plus	S
cg23239870	12127	1.97648e-05	0.0214388	0.133265	chr2	3313940	TSSC1	226754	plus	S
cg14949065	13315	1.70209e-06	0.00260153	0.00738981	chr2	27373128	TCF23	230376	plus	S
cg00087073	15385	1.78257e-05	0.0197352	0.0717094	chr2	71225672		235980	plus	S
cg15060346	15515	4.95419e-06	0.00663328	0.14281	chr2	73868736	NAT8	236454	plus	S
cg24074432	15844	2.29854e-07	0.000435761	0.137567	chr2	85505567	TCF7L1	237512	plus	S
cg04447741	16063	1.32387e-05	0.0153178	0.0399808	chr2	95613630		238262	plus	S
cg04707348	16208	4.56796e-08	9.98554e-05	0.0113024	chr2	98351548	ZAP70;ZAP70	238919	plus	S
cg23562675	17165	3.60785e-05	0.0357824	0.150143	chr2	120107745	C2orf76	241547	plus	S
cg24068126	17639	3.31433e-05	0.0331786	0.136803	chr2	131144603		242934	plus	S
cg25619609	18192	1.79134e-06	0.00271205	0.0885497	chr2	149270531	MBD5	244089	plus	S
cg02787917	19173	4.70735e-14	3.41845e-10	0.378596	chr2	175190821		246526	plus	S
cg26282655	114909	5.41707e-05	0.0491379	0.0252231	chr20	2505978		257735	plus	S
cg02872354	114944	2.90697e-05	0.0298682	0.0673758	chr20	3063118		257953	plus	S
cg23365723	114959	1.06178e-06	0.00174972	0.0147777	chr20	3224235		258091	plus	S
cg19654195	115333	8.98245e-07	0.00152118	0.0283532	chr20	24450361	TMEM90B;TMEM90B	259857	plus	S
cg23610041	115789	9.13012e-07	0.00152806	0.0325013	chr20	39320926		262119	plus	S
cg20678377	116069	4.6546e-05	0.0437973	0.0455802	chr20	47667340	CSE1L	263489	plus	S
cg26858716	116214	3.90991e-05	0.038247	0.0456805	chr20	54942094	C20orf108	264145	plus	S
cg00542760	116551	7.11572e-07	0.00124439	0.0152308	chr20	61917750	ARFGAP1;ARFGAP1	266010	plus	S
cg06804705	117054	6.1015e-06	0.00782699	0.114899	chr21	40125580	NCRNA00114;NCRNA00114;NCRNA00114	268373	plus	S
cg14757344	117280	1.89223e-05	0.020682	0.050207	chr21	45209507	RRP1;RRP1	269366	plus	S
cg09777775	117287	2.02559e-05	0.021916	0.048007	chr21	45336673	AGPAT3	269398	plus	S
cg20451718	117383	5.41568e-05	0.0491379	0.0139182	chr21	46360372	C21orf67;C21orf70;C21orf67	269863	plus	S
cg23827657	118077	3.27873e-05	0.0329163	0.00514357	chr22	29663658	EWSR1;RHBDD3;EWSR1;EWSR1;EWSR1;EWSR1	272846	plus	S
cg10632215	118980	3.90073e-05	0.0382445	0.00524527	chr22	47097566	CERK	277081	plus	S
cg24348110	23629	9.25634e-08	0.00019346	0.0468819	chr3	32862619	TRIM71	281780	plus	S
cg04843801	24004	1.71946e-05	0.0191353	0.0524227	chr3	42642061	NKTR	282941	plus	S
cg20917322	24441	1.55074e-05	0.0176708	0.057014	chr3	48475754	CCDC51	284419	plus	S
cg01142001	24495	3.2729e-05	0.0329163	0.0228018	chr3	49057935	DALRD3;NDUFAF3;NDUFAF3;MIR425;NDUFAF3;NDUFAF3;NDUFAF3	284754	plus	S
cg17900356	24793	5.34045e-05	0.048892	0.071956	chr3	53190593		286422	plus	S
cg19921389	27433	4.6613e-05	0.0437973	0.0284363	chr3	128780164	GP9	292894	plus	S
cg18802720	27977	2.02924e-06	0.00303042	0.16377	chr3	140992338	ACPL2;ACPL2	294624	plus	S
cg01328703	28068	4.02359e-05	0.0390029	0.0175252	chr3	142836347		294911	plus	S
cg14321066	28773	2.28453e-05	0.0242883	0.104373	chr3	168115836	C3orf50	296933	plus	S
cg04748593	28823	1.55515e-05	0.017674	0.0674727	chr3	169539775	LRRIQ4	297087	plus	S
cg02958321	29352	3.26797e-05	0.0329163	0.00892095	chr3	182972048	MCF2L2;B3GNT5	298309	plus	S
cg07349805	30326	1.34322e-06	0.00213943	0.0615712	chr4	714506	PCGF3	301541	plus	S
cg21333208	30613	1.36153e-06	0.00216057	0.00590509	chr4	3475372	DOK7;DOK7	303873	plus	S
cg15577451	31303	1.60255e-05	0.0181166	0.0631805	chr4	16164914	TAPT1	306451	plus	S
cg15601535	32311	2.12338e-05	0.0227443	0.0379785	chr4	56212295	SRD5A3	309184	plus	S
cg20429093	33067	3.84071e-05	0.0377424	0.0383405	chr4	83694973	SCD5;SCD5	311166	plus	S
cg06952910	34133	8.05885e-06	0.0100374	0.0279903	chr4	122744652	CCNA2	314102	plus	S
cg18030409	35855	9.35119e-11	3.13013e-07	0.29812	chr4	185937985		318699	plus	S
cg25090742	36361	3.81495e-12	1.72056e-08	0.0153278	chr5	1795139		321266	plus	S
cg26892415	36558	1.91143e-05	0.0208387	0.115113	chr5	5155797	ADAMTS16	322203	plus	S
cg08472341	37096	2.09437e-06	0.00311578	0.0142109	chr5	17670475		323456	plus	S
cg18273840	37723	4.04031e-05	0.0390765	0.0772421	chr5	45695643	HCN1	325150	plus	S
cg24992339	38697	9.36986e-08	0.000194882	0.114745	chr5	76238976		327718	plus	S
cg16684811	38782	9.08831e-07	0.00152806	0.0140801	chr5	77944851	LHFPL2	328018	plus	S
cg11296810	40021	5.14137e-05	0.0472714	0.13081	chr5	121866960		331136	plus	S
cg15851800	40249	3.76738e-05	0.0372784	0.0400728	chr5	126853405	PRRC1;PRRC1	331637	plus	S
cg01804827	40249	1.56784e-07	0.000309562	0.0551721	chr5	126853558	PRRC1	331638	plus	S
cg08260658	40435	1.68823e-07	0.000331803	0.152794	chr5	132155330		332217	plus	S
cg24613691	40435	3.58045e-07	0.000652792	0.227627	chr5	132155460		332219	plus	S
cg08682153	40864	4.77495e-05	0.044475	0.378839	chr5	139223811	PSD2	333830	plus	S
cg09484752	41002	2.04796e-05	0.0221022	0.100565	chr5	140818522	PCDHGA4;PCDHGA12;PCDHGA11;PCDHGA11;PCDHGA9;PCDHGA1;PCDHGB1;PCDHGB6;PCDHGB3;PCDHGB7;PCDHGA6;PCDHGA8;PCDHGA10;PCDHGA5;PCDHGB4;PCDHGA3;PCDHGA2;PCDHGB2;PCDHGA7;PCDHGB5	334806	plus	S
cg03851984	41292	5.84829e-10	1.67049e-06	0.0261234	chr5	146258354	PPP2R2B;PPP2R2B;PPP2R2B;PPP2R2B;PPP2R2B;PPP2R2B;PPP2R2B;PPP2R2B	335590	plus	S
cg08631357	41498	1.14652e-06	0.00186073	0.342646	chr5	149589210	SLC6A7	336134	plus	S
cg23146663	41626	1.17145e-08	2.7884e-05	0.126765	chr5	151066662	SPARC	336577	plus	S
cg12938814	41753	5.59246e-07	0.00100256	0.0755179	chr5	154253549	CNOT8	336949	plus	S
cg22464570	41866	2.20527e-06	0.00322477	0.0260726	chr5	157161695	THG1L	337225	plus	S
cg23468002	41918	3.98873e-08	8.76405e-05	0.0447301	chr5	158532401		337336	plus	S
cg17721879	41918	3.95975e-05	0.0385586	0.0172729	chr5	158532473		337337	plus	S
cg16190470	42233	2.31394e-05	0.0245401	0.026464	chr5	169028582	CCDC99	338095	plus	S
cg08718108	42891	3.62055e-06	0.00500401	0.0407371	chr5	178364361		340505	plus	S
cg21850069	43126	1.82647e-05	0.0200656	0.019979	chr5	180649807	TRIM41;TRIM41	341542	plus	S
cg14242460	43552	1.13859e-05	0.0132925	0.025517	chr6	5261506	LYRM4;FARS2;LYRM4;LYRM4	343008	plus	S
cg19580695	44635	1.8216e-05	0.0200636	0.0459348	chr6	25992679		345693	plus	S
cg02049629	44891	3.15039e-05	0.0319858	0.0719765	chr6	28662065		347306	plus	S
cg11526462	45020	6.40394e-11	2.19504e-07	0.0120065	chr6	30309578	TRIM39;TRIM39	349695	plus	S
cg12163646	45033	1.12711e-05	0.0131944	0.0776314	chr6	30529027	PRR3;PRR3	350036	plus	S
cg06087101	45470	9.91505e-11	3.29314e-07	0.318179	chr6	35551932	FKBP5;FKBP5;FKBP5;FKBP5	358405	plus	S
cg22881750	45581	9.74869e-06	0.0118325	0.0892469	chr6	36795406	CPNE5	358755	plus	S
cg11924832	45730	1.93497e-05	0.0210418	0.0533789	chr6	38605287	BTBD9;BTBD9	359125	plus	S
cg14422906	46436	1.06111e-09	2.93316e-06	0.0510082	chr6	51951835	PKHD1;PKHD1	361541	plus	S
cg15283498	47826	6.4262e-06	0.00818499	0.0876303	chr6	108981550	FOXO3;FOXO3	365523	plus	S
cg13966752	49589	1.15264e-06	0.00186361	0.0745916	chr6	153079640	VIP;VIP	370163	plus	S
cg06413196	50795	1.98252e-06	0.00299092	0.0109	chr7	640338	PRKAR1B;PRKAR1B;PRKAR1B;PRKAR1B;PRKAR1B;PRKAR1B	374641	plus	S
cg00275234	50830	1.32638e-05	0.0153178	0.0150839	chr7	895457	UNC84A;UNC84A	374931	plus	S
cg00457258	50907	8.03313e-12	3.37435e-08	0.0129051	chr7	1520879	INTS1	375957	plus	S
cg10284605	51631	7.20668e-06	0.00905495	0.0731067	chr7	17460742		379833	plus	S
cg10180281	52018	4.45278e-05	0.0424903	0.204853	chr7	26897714	SKAP2	380968	plus	S
cg04340874	52029	3.52549e-05	0.0350467	0.122496	chr7	27225811	HOXA11AS;HOXA11	381432	plus	S
cg11105292	52363	5.8349e-06	0.00755285	0.0469155	chr7	32802564		382404	plus	S
cg04728429	52477	1.00872e-05	0.0121063	0.161746	chr7	35225862		382643	plus	S
cg18723937	52603	8.26984e-07	0.0014173	0.00842304	chr7	37955713	SFRP4	382974	plus	S
cg06002665	52863	5.06789e-05	0.0467966	0.111193	chr7	43352591	HECW1	383592	plus	S
cg25319337	53166	3.93576e-05	0.0384122	0.0697624	chr7	48008127	HUS1	384522	plus	S
cg14946299	53598	2.42648e-05	0.0256068	0.027	chr7	64363590	ZNF273;ZNF273	385767	plus	S
cg14393469	54439	2.07192e-05	0.0223046	0.0149956	chr7	89840897	STEAP2;STEAP2	388077	plus	S
cg13547574	54439	7.77156e-15	6.65953e-11	0.448059	chr7	89840899	STEAP2;STEAP2	388078	plus	S
cg21974766	54640	4.62759e-06	0.00623496	0.13663	chr7	94138743	CASD1	388639	plus	S
cg23690528	54647	6.76789e-06	0.00855379	0.0766326	chr7	94285270	SGCE;SGCE;PEG10;SGCE;PEG10	388682	plus	S
cg11554605	54672	3.85483e-06	0.00524325	0.0429843	chr7	95115354	ASB4;ASB4	388878	plus	S
cg16107907	55199	4.87068e-09	1.22039e-05	0.0613006	chr7	102921442	DPY19L2P2;DPY19L2P2	391327	plus	S
cg18989536	55342	4.75722e-05	0.0444065	0.0609251	chr7	105889247	NAMPT	391693	plus	S
cg06644239	55556	2.93545e-06	0.0041646	0.0503369	chr7	111977542	ZNF277	392160	plus	S
cg25021359	55896	1.04177e-05	0.0124679	0.101919	chr7	123315035		393019	plus	S
cg16816602	56873	3.17303e-07	0.000585992	0.0772201	chr7	141532741		395771	plus	S
cg23667707	57368	6.92369e-06	0.00872497	0.020899	chr7	152569949		397832	plus	S
cg19549708	57434	5.04078e-07	0.000907458	0.0318903	chr7	155080124		398086	plus	S
cg14499577	57970	1.09729e-05	0.0129634	0.166848	chr8	1414612		401505	plus	S
cg20812772	57994	3.93848e-08	8.69825e-05	0.0387104	chr8	1614107	DLGAP2	401660	plus	S
cg03275056	60481	5.51593e-05	0.0498592	0.15124	chr8	61591461	CHD7;CHD7	409317	plus	S
cg13525812	60702	6.63987e-07	0.00117557	0.0543998	chr8	68220007	ARFGEF1	410038	plus	S
cg23053742	60825	5.26481e-11	1.86424e-07	0.628542	chr8	71564125	LACTB2	410316	plus	S
cg21449926	62108	7.87834e-06	0.00984115	0.144822	chr8	110253782	NUDCD1;NUDCD1	413691	plus	S
cg07299736	63097	1.31309e-10	4.26211e-07	0.00923151	chr8	135490787	ZFAT;ZFAT	415790	plus	S
cg20069408	63446	6.43788e-06	0.00818499	0.0170364	chr8	143459569	TSNARE1	417161	plus	S
cg13261536	63547	5.32854e-11	1.87134e-07	0.0263132	chr8	144343915	ZFP41	417716	plus	S
cg02365514	63608	3.06126e-05	0.0312289	0.0332551	chr8	144798535	MAPK15;MAPK15	418252	plus	S
cg02837279	63734	4.3135e-05	0.0413455	0.142227	chr8	146227670	ZNF252;C8orf77	419529	plus	S
cg03307092	63734	4.60512e-05	0.04346	0.0129736	chr8	146228110	ZNF252;C8orf77	419532	plus	S
cg25166322	63734	1.34445e-05	0.0154849	0.00909417	chr8	146228165	ZNF252;C8orf77	419535	plus	S
cg14480283	64625	2.75654e-05	0.0284591	0.058348	chr9	87023997		421858	plus	S
cg14345213	65077	3.8887e-08	8.63282e-05	0.122173	chr9	100176407	TDRD7	422964	plus	S
cg14377739	66733	1.36736e-09	3.72887e-06	0.00490618	chr9	139699037	KIAA1984;LOC100131193	427697	plus	S

## Sheet: BWS13_hyper
row.names	regionID	Pvalue_M	AdjustedPvalue_M	Betadif	chr	pos	Genename	Index	direction	significance
cg13244315	22	1.47127e-12	7.32989e-09	0.0204516	chr1	985393	AGRN	332	plus	S
cg22433276	30	3.46245e-06	0.0047701	0.0333308	chr1	1072642		484	plus	S
cg20256117	34	5.63179e-07	0.000972968	0.112915	chr1	1093335		512	plus	S
cg14288281	34	7.08966e-07	0.00118194	0.29299	chr1	1093457		513	plus	S
cg15546282	123	6.48074e-10	2.08057e-06	0.00569839	chr1	1903425	KIAA1751	1490	plus	S
cg22031783	246	3.59522e-09	1.01341e-05	0.0107175	chr1	3128606	PRDM16;PRDM16	3104	plus	S
cg10248231	274	4.97916e-05	0.0453902	0.27675	chr1	3339870	PRDM16;PRDM16	3410	plus	S
cg14969806	432	1.03567e-05	0.0126782	0.0106214	chr1	5919854		4324	plus	S
cg00055811	728	1.52924e-06	0.00236451	0.119458	chr1	8543012	RERE;RERE	5603	plus	S
cg03772253	1652	2.73988e-05	0.0278839	0.147427	chr1	18884374		8687	plus	S
cg24517325	1652	2.89467e-05	0.0291134	0.143819	chr1	18884428		8688	plus	S
cg08868202	2871	1.87781e-06	0.00278393	0.0233582	chr1	33745794	ZNF362	13460	plus	S
cg13064049	3181	5.47215e-05	0.0489471	0.128856	chr1	38478702	UTP11L	14662	plus	S
cg24685134	4267	4.71166e-06	0.00630853	0.0916368	chr1	55267152	TTC22;TTC22	18783	plus	S
cg23723105	4896	1.32695e-06	0.00207495	0.0360984	chr1	68150193	GADD45A	20275	plus	S
cg08058560	6566	4.0347e-05	0.0380767	0.609649	chr1	117544206	CD101	25377	plus	S
cg18948743	6702	5.98751e-07	0.00102615	0.0337868	chr1	120838323	FAM72B	25797	plus	S
cg23109894	7297	4.08518e-11	1.59119e-07	0.0169787	chr1	155261708	PKLR;PKLR	28666	plus	S
cg04138112	8014	1.51918e-07	0.000304158	0.0921426	chr1	167090618	DUSP27	31355	plus	S
cg14508237	8457	2.4464e-05	0.0258557	0.0903965	chr1	178263527	RASAL2	32548	plus	S
cg06537019	8464	2.30618e-05	0.0246622	0.0965844	chr1	178420683	RASAL2;RASAL2	32557	plus	S
cg26223536	10028	8.25588e-08	0.000179557	0.0165844	chr1	212820166		37172	plus	S
cg03585720	11189	2.70856e-05	0.027783	0.0411183	chr1	235048762		40712	plus	S
cg11145055	11574	4.16018e-08	9.57422e-05	0.0185692	chr1	244624752	C1orf101;C1orf101	41749	plus	S
cg00477776	66910	2.37125e-06	0.0034093	0.127802	chr10	423907	DIP2C	42783	plus	S
cg06636244	67196	2.37144e-13	1.37304e-09	0.0166631	chr10	3572706		44213	plus	S
cg13728376	67311	4.6809e-10	1.55469e-06	0.014139	chr10	5523245		44461	plus	S
cg20601730	67479	2.99775e-09	8.67837e-06	0.0190224	chr10	7830119	ATP5C1;ATP5C1;ATP5C1;ATP5C1;KIN	44983	plus	S
cg08740088	69367	2.03949e-05	0.0223485	0.06592	chr10	60532792	BICC1	50235	plus	S
cg20184056	69550	1.90686e-05	0.0210567	0.0708403	chr10	64323709	ZNF365;ZNF365	50629	plus	S
cg17276002	70071	4.12211e-05	0.0385618	0.103028	chr10	75172806	ANXA7;ANXA7	52189	plus	S
cg02032166	70109	9.78467e-08	0.000207539	0.0149126	chr10	75574934	CAMK2G;CAMK2G;CAMK2G;CAMK2G;CAMK2G	52351	plus	S
cg16509336	70382	6.17542e-11	2.33078e-07	0.0595219	chr10	79785712	POLR3A	52950	plus	S
cg11526424	71302	4.05304e-07	0.000726586	0.0444853	chr10	98617461	LCOR;LCOR;LCOR	55436	plus	S
cg02064267	72010	3.86698e-05	0.0368183	0.0275578	chr10	112220471		58318	plus	S
cg27235904	72523	6.21648e-07	0.00106115	0.0164316	chr10	121566670	INPP5F	59828	plus	S
cg12885302	73021	9.80861e-10	3.00181e-06	0.148139	chr10	129979348		61367	plus	S
cg10128659	73362	5.15093e-07	0.000904483	0.0163652	chr10	134404064	INPP5A	63169	plus	S
cg19872996	73979	2.22231e-05	0.0240444	0.364126	chr11	5617703	TRIM6;TRIM6-TRIM34;TRIM6	68723	plus	S
cg14304349	73979	3.34712e-06	0.00462609	0.405354	chr11	5617812	TRIM6;TRIM6-TRIM34;TRIM6	68725	plus	S
cg26668837	74178	3.5517e-05	0.0343508	0.0254311	chr11	8615356	STK33;STK33	69431	plus	S
cg14914246	75740	2.21915e-07	0.00042637	0.0565293	chr11	45717570		73963	plus	S
cg06911753	75923	8.03367e-09	2.1305e-05	0.00717674	chr11	47611236	C1QTNF4	74772	plus	S
cg14401631	76768	2.02847e-08	4.99486e-05	0.0378331	chr11	65222745		78528	plus	S
cg19379303	76798	4.44089e-16	4.22826e-12	0.0419261	chr11	65488190	RNASEH2C	78804	plus	S
cg15813673	79096	4.21912e-09	1.1815e-05	0.0134142	chr11	114113008	ZBTB16;ZBTB16	86724	plus	S
cg09745958	79326	7.70009e-06	0.00973195	0.0418052	chr11	117670977		87316	plus	S
cg11106836	79343	4.05691e-05	0.0382022	0.0210209	chr11	117852822		87374	plus	S
cg10016610	79877	0	0	0.45943	chr11	124735994	ROBO3	89139	plus	S
cg04078728	81551	1.21435e-05	0.0144526	0.0500305	chr12	13348620	EMP1	94433	plus	S
cg23368416	81614	3.02175e-05	0.0299003	0.0825235	chr12	14926317	H2AFJ;H2AFJ	94567	plus	S
cg26378403	82150	3.88774e-05	0.0369339	0.49964	chr12	30908310	CAPRIN2;CAPRIN2;CAPRIN2	95911	plus	S
cg16253870	83856	1.19169e-05	0.0142224	0.182933	chr12	68959172		102442	plus	S
cg13027280	84557	5.12447e-05	0.0463206	0.06837	chr12	94017329		104089	plus	S
cg11342468	84956	2.55728e-05	0.0266164	0.0425536	chr12	103889784	C12orf42;C12orf42	105172	plus	S
cg03339668	85975	1.58629e-12	7.81208e-09	0.0123498	chr12	120241957	CIT	108558	plus	S
cg02823783	86313	2.8275e-05	0.0286396	0.0215087	chr12	124246919	DNAH10	110078	plus	S
cg07347092	86313	1.34448e-07	0.000271966	0.0419216	chr12	124246927	DNAH10	110079	plus	S
cg10606269	86767	2.25739e-06	0.0032786	0.0168773	chr12	131372010		111660	plus	S
cg11281377	87149	5.3749e-06	0.00702103	0.0966922	chr13	21950690	ZDHHC20	114071	plus	S
cg13224075	87615	7.63791e-09	2.05817e-05	0.0182627	chr13	30107081	SLC7A1	115472	plus	S
cg13686648	87864	1.51101e-08	3.80823e-05	0.00584445	chr13	34256302		116052	plus	S
cg00287312	88750	1.5069e-05	0.0174496	0.0390243	chr13	53420425	PCDH8;PCDH8	118485	plus	S
ch.13.54171608F	88806	2.98985e-09	8.67837e-06	0.166199	chr13	55273607		118585	plus	S
cg05845236	88973	2.13948e-06	0.00312857	0.0172633	chr13	67804635	PCDH9;PCDH9	118861	plus	S
cg25264081	89448	5.68171e-07	0.000977652	0.0150482	chr13	95620306		120027	plus	S
cg02015529	89668	3.51684e-06	0.0048295	0.0390519	chr13	100153203	TM9SF2	120603	plus	S
cg23319601	92380	1.35868e-08	3.50681e-05	0.013656	chr14	70316638		130748	plus	S
cg16784943	93445	1.43273e-06	0.00222413	0.0124271	chr14	93415143	ITPK1;ITPK1;ITPK1	133765	plus	S
cg16398956	93862	3.61361e-05	0.0347925	0.123589	chr14	100212958		135015	plus	S
cg09262100	94164	3.1234e-05	0.030764	0.100457	chr14	103416268	CDC42BPB	136488	plus	S
cg11553153	95063	5.47189e-07	0.000949172	0.0440445	chr15	34348521	CHRM5	140045	plus	S
cg24006582	95673	2.3744e-07	0.000452143	0.019106	chr15	45444508	DUOX1;DUOX1	142240	plus	S
cg08174355	95797	1.14687e-05	0.0137845	0.0737255	chr15	49016042		142581	plus	S
cg14296394	95937	2.52533e-05	0.0263899	0.207614	chr15	51910925	DMXL2	142941	plus	S
cg25141441	96314	1.59642e-05	0.0183376	0.115833	chr15	60830876	RORA;RORA;RORA;RORA	144014	plus	S
cg13625631	97052	2.61176e-07	0.000492961	0.0413716	chr15	70340707	TLE3;TLE3;TLE3	146006	plus	S
cg16268380	97859	0	0	0.43524	chr15	81294324	MESDC1;MESDC1	148463	plus	S
cg22514595	98009	2.39442e-05	0.0253935	0.0105344	chr15	85197683	WDR73	148948	plus	S
cg22208361	99167	1.64836e-05	0.0188332	0.0405983	chr16	2034040	GFER	154662	plus	S
cg09053902	99421	1.09947e-06	0.0017512	0.0200389	chr16	4034298	ADCY9	156282	plus	S
cg04113258	100115	1.51612e-05	0.0174747	0.0876466	chr16	17527041	XYLT1	158223	plus	S
cg03084308	100219	1.50848e-08	3.80823e-05	0.046233	chr16	20361044	UMOD;UMOD	158526	plus	S
cg09965996	101420	2.36585e-06	0.0034093	0.020755	chr16	56390429	GNAO1	162750	plus	S
cg06666025	101804	4.77698e-05	0.0437333	0.0114812	chr16	66613278	CMTM2	163908	plus	S
cg00049664	101804	1.84005e-06	0.00274696	0.164955	chr16	66613334	CMTM2	163909	plus	S
cg16678014	101818	9.08732e-10	2.80108e-06	0.0495004	chr16	66781270	DYNC1LI2	163953	plus	S
cg03880890	102051	4.36559e-05	0.040486	0.0356569	chr16	69439245		165155	plus	S
cg08952239	103027	3.64745e-05	0.0349611	0.0181837	chr16	85952285	IRF8	168261	plus	S
cg05167857	103045	1.09434e-07	0.000227608	0.0476802	chr16	86121574		168328	plus	S
cg08922090	103240	5.31366e-11	2.05104e-07	0.00959881	chr16	87730600	JPH3	169172	plus	S
cg08539210	103555	1.69075e-06	0.00255074	0.242309	chr16	90038463	CENPBD1;AFG3L1;CENPBD1;AFG3L1;AFG3L1	171453	plus	S
cg13969584	103555	3.76827e-07	0.000678374	0.249673	chr16	90038469	CENPBD1;AFG3L1;CENPBD1;AFG3L1;AFG3L1	171454	plus	S
cg23730222	103653	1.69033e-05	0.0191274	0.010771	chr17	717806	NXN	171932	plus	S
cg13480818	104215	0	0	0.22415	chr17	6917878	C17orf49;C17orf49;C17orf49	174624	plus	S
cg25953958	104395	5.36354e-06	0.00702103	0.0648167	chr17	8485965	MYH10	176066	plus	S
cg24679317	105111	6.03716e-08	0.000135426	0.00738935	chr17	20515873		178303	plus	S
cg07953150	105512	5.68869e-06	0.00734139	0.0431308	chr17	29901869	MIR365-2	179814	plus	S
cg14316496	105750	1.75919e-07	0.000342605	0.0606045	chr17	34329201	CCL15;CCL14-CCL15;CCL14-CCL15	180622	plus	S
cg04800503	106855	1.85114e-06	0.00275392	0.0169366	chr17	46648533	HOXB3	185490	plus	S
cg01234133	107023	2.98645e-05	0.029686	0.0770453	chr17	48279072	COL1A1	186502	plus	S
cg12537665	107023	7.21656e-06	0.00914782	0.0892106	chr17	48279080	COL1A1	186504	plus	S
cg05561386	108723	3.57608e-06	0.00489517	0.00384162	chr17	76455102	DNAH17	192471	plus	S
cg05396584	109142	8.50751e-11	3.14231e-07	0.0111533	chr17	80049347	FASN	195698	plus	S
cg13292542	109194	7.11084e-08	0.000157045	0.00989012	chr17	80394588	HEXDC	196102	plus	S
cg16743273	110775	2.38361e-06	0.00341562	0.103148	chr19	2076833	MOBKL2A	204393	plus	S
cg06647026	111021	3.8214e-05	0.0364653	0.00838893	chr19	3964837	DAPK3	205840	plus	S
cg15979759	112100	1.63118e-05	0.0186868	0.0789274	chr19	16771653	TMEM38A;C19orf42	211765	plus	S
cg11640008	113340	2.22045e-16	2.32039e-12	0.00995865	chr19	42914542	LIPE	218046	plus	S
cg16185947	113777	5.41495e-05	0.0485368	0.1383	chr19	48689918		220308	plus	S
cg03656968	114416	9.52134e-08	0.000203973	0.0321391	chr19	55574425	RDH13;RDH13;RDH13;RDH13;RDH13	223647	plus	S
cg08278892	114416	5.10022e-05	0.046199	0.052852	chr19	55574619	RDH13;RDH13;RDH13;RDH13	223648	plus	S
cg23871388	114525	1.2586e-08	3.26819e-05	0.00768212	chr19	56609854	ZNF787	224323	plus	S
cg04709676	11891	2.97714e-07	0.000554595	0.00937785	chr2	464466		225755	plus	S
cg16332701	12147	7.1354e-07	0.00118496	0.0431513	chr2	3502815	ADI1	226921	plus	S
cg26052635	13465	1.88896e-05	0.0209672	0.3508	chr2	29339307	CLIP4	230947	plus	S
cg17281638	13679	2.55129e-13	1.4383e-09	0.0210731	chr2	33952673	MYADML	231422	plus	S
cg20949959	14095	2.00103e-06	0.00294622	0.00814883	chr2	43453251	ZFP36L2;LOC100129726	232382	plus	S
cg13779451	14753	1.77534e-08	4.44825e-05	0.0550703	chr2	59162656		234100	plus	S
cg07610327	15939	5.27294e-05	0.0475624	0.0425316	chr2	86423112	IMMT;IMMT;IMMT	237874	plus	S
cg13656404	16705	1.07068e-11	4.48672e-08	0.012674	chr2	106959384		240224	plus	S
cg24082880	17129	4.1787e-08	9.57422e-05	0.0607006	chr2	119496816		241346	plus	S
cg14510371	17304	2.26448e-05	0.024439	0.0134904	chr2	121726394	GLI2	241970	plus	S
cg04721485	17501	2.54285e-06	0.0036076	0.120301	chr2	128494954	WDR33;WDR33	242560	plus	S
cg13263723	18008	4.08847e-05	0.0383309	0.051358	chr2	143304749		243796	plus	S
cg25751895	18690	3.27848e-05	0.0319245	0.0848994	chr2	163200637	GCA;GCA	245300	plus	S
cg19922493	19225	3.21321e-05	0.0314318	0.0168463	chr2	176045768	ATP5G3;ATP5G3	246763	plus	S
cg00455450	19225	1.14752e-06	0.00181424	0.0122886	chr2	176045970	ATP5G3;ATP5G3	246764	plus	S
cg07428089	19225	9.04396e-10	2.80108e-06	0.0682567	chr2	176046170	ATP5G3;ATP5G3;ATP5G3	246765	plus	S
cg04306050	19225	1.80745e-07	0.000350412	0.0435204	chr2	176046468	ATP5G3;ATP5G3;ATP5G3	246768	plus	S
cg18241829	19247	9.50604e-06	0.0117998	0.0817637	chr2	176952696		246870	plus	S
cg25207147	19330	3.5777e-07	0.000655077	0.033587	chr2	178973079	PDE11A	247381	plus	S
cg08000644	19597	1.67356e-05	0.0190197	0.0981891	chr2	189600758	DIRC1	248057	plus	S
cg02540338	20649	7.34831e-07	0.0012156	0.103436	chr2	217243695		250712	plus	S
cg23347597	22245	2.97112e-06	0.0041601	0.0863041	chr2	242093840	PPP1R7	256429	plus	S
cg21073859	22320	1.69643e-05	0.0191274	0.0798196	chr2	242823562		256970	plus	S
cg16595261	22320	3.96062e-05	0.037543	0.0268885	chr2	242823679		256971	plus	S
cg25655084	115016	4.87752e-06	0.00649004	0.0198938	chr20	4666494	PRNP;PRNP;PRNP;PRNP;PRNP	258363	plus	S
cg11252765	115719	1.9003e-05	0.0210385	0.00472801	chr20	36151120	BLCAP;BLCAP;BLCAP;NNAT;BLCAP;BLCAP;NNAT	261711	plus	S
cg11264863	115912	8.31328e-08	0.000179892	0.218262	chr20	43835661	SEMG1;SEMG1	262690	plus	S
cg24814191	116307	3.43536e-09	9.74764e-06	0.0098215	chr20	57041568	APCDD1L	264536	plus	S
cg16737409	116321	2.36824e-06	0.0034093	0.132628	chr20	57428366	GNAS;GNAS;GNAS;GNAS	264701	plus	S
cg14520770	117682	1.03775e-07	0.000217955	0.0122746	chr22	19842507	GNB1L;C22orf29	271250	plus	S
cg04059188	118746	3.66716e-05	0.0350716	0.0671863	chr22	43045723	CYB5R3	276000	plus	S
cg08314021	118776	4.64245e-05	0.0427758	0.00784834	chr22	43547679	TSPO;TSPO	276152	plus	S
cg09829176	118931	4.28272e-05	0.0398037	0.0335024	chr22	46545347	PPARA;PPARA	276835	plus	S
cg08119928	22402	3.26196e-07	0.000602414	0.0472859	chr3	3134102	IL5RA;IL5RA;IL5RA;IL5RA;IL5RA;IL5RA	278300	plus	S
cg24365088	22699	1.57528e-07	0.000312307	0.00684428	chr3	10400512	ATP2B2;ATP2B2	279264	plus	S
cg26094714	24442	2.46083e-05	0.0258557	0.0130591	chr3	48481771	CCDC72;CCDC51	284433	plus	S
cg05972102	25962	3.16529e-06	0.00440318	0.0610384	chr3	87282710	CHMP2B	288963	plus	S
cg05452836	28133	1.58175e-07	0.000312307	0.0615328	chr3	146262174	PLSCR1	295058	plus	S
cg10679755	28133	1.55587e-06	0.00238078	0.0795665	chr3	146262421	PLSCR1;PLSCR1	295060	plus	S
cg04126095	29645	1.34569e-07	0.000271966	0.00797296	chr3	186953727	MASP1;MASP1	299361	plus	S
cg13929734	30423	2.30819e-05	0.0246622	0.00550744	chr4	1623883		302756	plus	S
cg03674224	30497	1.47748e-11	6.0289e-08	0.00803297	chr4	2343207	ZFYVE28	303231	plus	S
cg27094117	34082	6.41154e-06	0.00817574	0.0100608	chr4	120988415	MAD2L1	313952	plus	S
cg01924320	34763	1.05833e-06	0.00169196	0.0863907	chr4	147364608	SLC10A7;SLC10A7	315663	plus	S
cg16700392	35102	4.32122e-09	1.20224e-05	0.178798	chr4	156680207	GUCY1B3;GUCY1B3	316619	plus	S
cg27272220	35102	6.26166e-14	3.94534e-10	0.0946879	chr4	156680400	GUCY1B3	316621	plus	S
cg22664296	35102	4.35376e-07	0.000777244	0.0639497	chr4	156680518	GUCY1B3	316622	plus	S
cg20312026	35252	7.20759e-10	2.27068e-06	0.234734	chr4	164253332	NPY1R	316938	plus	S
cg07108441	35904	3.193e-13	1.75392e-09	0.226034	chr4	186508724	SORBS2;SORBS2;SORBS2;SORBS2;SORBS2;SORBS2;SORBS2;SORBS2	318879	plus	S
cg04286878	36188	5.6323e-08	0.00012701	0.0132081	chr5	306765	AHRR;PDCD6	319725	plus	S
cg22892539	36348	1.47438e-13	8.77364e-10	0.339329	chr5	1667258		321172	plus	S
cg07429743	36699	1.98407e-07	0.000382921	0.10944	chr5	9195084	SEMA5A	322606	plus	S
cg13288599	36897	3.16221e-05	0.0310748	0.114415	chr5	14195757	TRIO	323000	plus	S
cg00041865	36976	1.38512e-07	0.00027862	0.0444163	chr5	14904423		323180	plus	S
cg02303571	37454	3.27568e-05	0.0319245	0.0177779	chr5	36606769	SLC1A3;SLC1A3;SLC1A3;SLC1A3	324252	plus	S
cg06843889	37654	2.39181e-05	0.0253935	0.181904	chr5	42949542		324841	plus	S
cg11193431	38132	8.848e-07	0.00143597	0.0582794	chr5	60240670	ERCC8;NDUFAF2	326157	plus	S
cg16928795	38132	2.75949e-06	0.00388919	0.134584	chr5	60240817	NDUFAF2;ERCC8	326158	plus	S
cg17629685	38132	9.22961e-07	0.00149225	0.0958703	chr5	60240870	NDUFAF2;ERCC8;ERCC8	326160	plus	S
cg00643557	38132	1.68035e-06	0.00254401	0.0873222	chr5	60240891	NDUFAF2;ERCC8;ERCC8	326161	plus	S
cg09858107	38132	1.66499e-05	0.0189726	0.0518123	chr5	60240938	NDUFAF2;ERCC8	326163	plus	S
cg11649654	38132	1.03596e-06	0.00166865	0.032799	chr5	60240952	NDUFAF2;ERCC8	326164	plus	S
cg20540608	38132	5.67983e-06	0.00734139	0.05172	chr5	60241003	NDUFAF2;ERCC8;NDUFAF2	326165	plus	S
cg23316671	38132	4.5536e-06	0.00611601	0.102797	chr5	60241324	NDUFAF2;ERCC8	326166	plus	S
cg17409276	38132	1.2188e-12	6.14354e-09	0.0364975	chr5	60241424	NDUFAF2;ERCC8	326167	plus	S
cg06610675	38132	7.96163e-12	3.48081e-08	0.098358	chr5	60241428	NDUFAF2;ERCC8	326168	plus	S
cg25112826	38132	8.25783e-06	0.0103453	0.0731239	chr5	60241636	NDUFAF2;ERCC8	326169	plus	S
cg18151987	39607	9.08183e-06	0.0113115	0.115771	chr5	108083631	FER;FER	330040	plus	S
cg08966388	39818	5.08675e-07	0.000896889	0.0241707	chr5	114849119		330651	plus	S
cg12453014	39963	1.06234e-07	0.000222032	0.0835847	chr5	119801142	PRR16	331008	plus	S
cg12441669	40135	1.2192e-09	3.67866e-06	0.0186984	chr5	124311925		331395	plus	S
cg05967596	40439	6.01876e-06	0.00772085	0.047044	chr5	132210176	LEAP2	332272	plus	S
cg18636698	41743	2.2149e-05	0.0240249	0.0626182	chr5	154163535	LARP1;LARP1	336913	plus	S
cg22907761	43407	2.47242e-07	0.000468724	0.0551769	chr6	3409679	SLC22A23;SLC22A23	342606	plus	S
cg10254035	44426	5.05467e-06	0.00670493	0.0584238	chr6	21741635	FLJ22536	345218	plus	S
cg05127899	44923	2.67944e-05	0.0275965	0.104601	chr6	28911474		347675	plus	S
cg19358805	45010	3.97398e-05	0.0375865	0.0257248	chr6	30130109	TRIM10;TRIM10;TRIM15	349241	plus	S
cg22798756	45229	1.7631e-05	0.0197751	0.0788437	chr6	32938295	BRD2;BRD2	355701	plus	S
cg17225129	45245	1.83373e-06	0.00274696	0.201683	chr6	33244755	B3GALT4	356721	plus	S
cg22627740	45258	3.76508e-07	0.000678374	0.0692491	chr6	33418814	SYNGAP1	357566	plus	S
cg18773383	46065	1.81595e-05	0.0202617	0.01079	chr6	43325153	ZNF318	360410	plus	S
cg22301664	46914	7.81331e-08	0.000171674	0.00707786	chr6	74072820	C6orf221	362728	plus	S
cg01684562	47079	6.58442e-08	0.000146934	0.107511	chr6	80713632	TTK;TTK	363205	plus	S
cg14728024	47350	8.50256e-07	0.00139044	0.143608	chr6	90543432	CASP8AP2;CASP8AP2;CASP8AP2	364057	plus	S
cg11757651	49079	4.66957e-05	0.0428415	0.0623047	chr6	141807188		368733	plus	S
cg00087425	51822	5.35187e-05	0.0480719	0.153163	chr7	22766829	IL6;IL6	380326	plus	S
cg24421397	52006	1.38066e-05	0.0161626	0.184846	chr7	26488474	LOC441204	380938	plus	S
cg18723937	52603	2.48794e-08	6.02242e-05	0.0108719	chr7	37955713	SFRP4	382973	plus	S
cg22035166	52837	1.00153e-05	0.0123308	0.0469612	chr7	42951793	C7orf25;C7orf25	383510	plus	S
cg01887633	54448	1.6001e-07	0.000314482	0.0964391	chr7	89949631		388108	plus	S
cg24002213	54519	1.52976e-07	0.000304851	0.0140039	chr7	91764177	CYP51A1;CYP51A1	388276	plus	S
cg13205784	54525	1.77546e-05	0.0198617	0.00745472	chr7	91875234	KRIT1;KRIT1;KRIT1;KRIT1;ANKIB1;KRIT1;KRIT1;KRIT1	388296	plus	S
cg18416881	56439	1.01025e-05	0.0124024	0.041838	chr7	134143823	AKR1B1;AKR1B1	394604	plus	S
cg16132520	56439	6.6723e-09	1.82087e-05	0.0197291	chr7	134143906	AKR1B1	394605	plus	S
cg09142848	57899	1.28141e-05	0.0151247	0.0407392	chr8	850121		401009	plus	S
cg23002008	58670	3.20341e-05	0.0314076	0.053987	chr8	17600575	MTUS1;MTUS1	403879	plus	S
cg21724239	60386	1.17247e-05	0.0140321	0.581932	chr8	58056113		409047	plus	S
cg14552882	61354	1.37868e-05	0.0161626	0.0595263	chr8	93091082	RUNX1T1	411748	plus	S
cg26185884	63575	4.49453e-07	0.000799045	0.0155606	chr8	144568432	ZC3H3	417983	plus	S
cg13916261	66121	4.08341e-05	0.0383309	0.274813	chr9	132800969	FNBP1	425747	plus	S
cg13422850	66281	1.11022e-15	1.01208e-11	0.0573218	chr9	135116388	NTNG2	426170	plus	S

## Sheet: BWS14_hyper
row.names	regionID	Pvalue_M	AdjustedPvalue_M	Betadif	chr	pos	Genename	Index	direction	significance
cg02300356	133	2.17324e-08	5.38228e-05	0.0133867	chr1	2027983	PRKCZ;PRKCZ	1686	plus	S
cg01514357	141	1.29428e-08	3.40209e-05	0.0141769	chr1	2105392	PRKCZ;PRKCZ;PRKCZ	1815	plus	S
cg15061086	553	3.51101e-06	0.00518728	0.0359153	chr1	6870250	CAMTA1	5088	plus	S
cg02984188	2146	2.17496e-05	0.0242045	0.186777	chr1	24646392	GRHL3	10453	plus	S
cg23931558	2269	2.33446e-07	0.000452584	0.0229503	chr1	26126460	SEPN1;SEPN1	10883	plus	S
cg17513542	2858	1.69841e-05	0.0195092	0.0079794	chr1	33613303	TRIM62	13401	plus	S
cg02773041	3313	2.21278e-06	0.00344754	0.103086	chr1	40204384	PPIE;PPIE;PPIE	15072	plus	S
cg05343316	3749	1.71768e-05	0.0196253	0.0200908	chr1	45956843	TESK2	16862	plus	S
cg16399300	4814	5.16183e-05	0.0499235	0.0744005	chr1	66458687	PDE4B;PDE4B;PDE4B	20087	plus	S
cg21245975	5328	0	0	0.454612	chr1	85725523	C1orf52;C1orf52	21423	plus	S
cg19378640	6057	4.26059e-12	2.12264e-08	0.392244	chr1	109656145	C1orf194;KIAA1324	23604	plus	S
cg21813112	6419	1.5764e-05	0.0183039	0.0714886	chr1	115054104	TRIM33;TRIM33	24930	plus	S
cg09268800	7179	1.26915e-08	3.35664e-05	0.00520634	chr1	153914384	DENND4B	27868	plus	S
cg08480098	7456	1.24996e-05	0.0152578	0.228824	chr1	156906550	ARHGEF11;MIR765;ARHGEF11	29558	plus	S
cg04143011	7670	3.43355e-06	0.00509039	0.0198657	chr1	160639836		30272	plus	S
cg01939891	7817	1.78243e-07	0.000360232	0.0339703	chr1	162534495	UAP1	30849	plus	S
cg00903584	9321	2.86832e-06	0.00443662	0.293804	chr1	202128682	PTPN7;PTPN7;PTPN7	34870	plus	S
cg18384097	9321	2.89497e-08	6.89091e-05	0.165953	chr1	202129566	PTPN7;PTPN7	34874	plus	S
cg17340519	10559	3.49353e-05	0.0360679	0.113723	chr1	224805852	CNIH3	38556	plus	S
cg00502077	10643	3.87814e-07	0.00071009	0.240949	chr1	226186128	C1orf55	38771	plus	S
cg16580616	11205	7.52969e-06	0.00980588	0.0123774	chr1	235256519		40741	plus	S
cg05353356	67788	8.85693e-09	2.40177e-05	0.0526511	chr10	14505002		45892	plus	S
cg21381525	67961	3.23843e-07	0.000607254	0.0870419	chr10	18898790	NSUN6	46394	plus	S
cg02603140	68286	1.62944e-09	5.059e-06	0.0529234	chr10	28879432	WAC;WAC;WAC	47449	plus	S
cg17845896	68303	1.36873e-05	0.0164269	0.101926	chr10	29129861		47488	plus	S
cg02949574	69164	5.04041e-07	0.000899829	0.0874679	chr10	50824106	CHAT;CHAT;CHAT;CHAT;CHAT;CHAT;CHAT	49752	plus	S
cg16422814	72613	3.02822e-05	0.0323555	0.0637918	chr10	123691602		60058	plus	S
cg18195080	72686	8.35598e-08	0.000185501	0.0825606	chr10	124639012	LOC399815;FAM24B;FAM24B	60266	plus	S
cg04944583	73013	4.60621e-05	0.0450583	0.034795	chr10	129896201	MKI67;MKI67	61336	plus	S
cg12789488	73280	2.23018e-05	0.0246272	0.0396206	chr10	133760222	PPP2R2D;PPP2R2D;PPP2R2D	62510	plus	S
cg10698677	74245	1.47508e-05	0.0174106	0.00362054	chr11	9287040	DENND5A	69631	plus	S
cg11302992	75197	1.43342e-05	0.0170126	0.0470535	chr11	31789446	ELP4	72246	plus	S
cg07271996	76267	3.90731e-05	0.0392982	0.0587662	chr11	60280643		75836	plus	S
cg07669138	77112	2.59759e-07	0.000499081	0.0680588	chr11	68583531	CPT1A;CPT1A	80752	plus	S
cg10894441	78912	8.56922e-06	0.0110217	0.033746	chr11	111169905	C11orf92;C11orf93	86118	plus	S
cg10016610	79877	0	0	0.520606	chr11	124735994	ROBO3	89139	plus	S
cg03260792	80559	3.84729e-07	0.000707463	0.0492412	chr11	134230331	GLB1L2	91056	plus	S
cg24111466	80662	6.67479e-06	0.0089019	0.0575248	chr12	886615	WNK1	91417	plus	S
cg20643274	81568	8.84802e-06	0.0113164	0.0312423	chr12	13717392	GRIN2B	94462	plus	S
cg24755515	81796	2.78819e-11	1.18279e-07	0.00844364	chr12	20960446		94992	plus	S
cg04454629	82257	6.69011e-06	0.0089019	0.0605326	chr12	32851191	DNM1L;DNM1L;DNM1L	96164	plus	S
cg15996644	83159	1.12588e-05	0.0140529	0.0833773	chr12	54370352		99621	plus	S
cg20024953	83394	4.99782e-05	0.0486668	0.00501477	chr12	57584802	LRP1	101007	plus	S
cg19013339	84679	6.8007e-06	0.00902104	0.0664719	chr12	96052514	NTN4	104378	plus	S
cg17279942	85468	1.41413e-08	3.67207e-05	0.00771104	chr12	111499763	CUX2	106766	plus	S
cg21805029	85829	9.32393e-07	0.00156605	0.0514316	chr12	117204781	RNFT2;RNFT2	108055	plus	S
cg08195842	87096	1.06492e-05	0.0133412	0.0430914	chr13	21278118	IL17D	113894	plus	S
cg11953513	88170	2.44687e-08	5.95667e-05	0.0427848	chr13	42618810		116888	plus	S
cg02828858	88347	2.20869e-06	0.00344754	0.0343518	chr13	45694314	GTF2F2	117272	plus	S
cg15258722	90016	3.50267e-05	0.0360754	0.0881033	chr13	110802573	COL4A1	121603	plus	S
cg14270002	90151	1.53631e-05	0.0179357	0.0249183	chr13	111935521	ARHGEF7;ARHGEF7;ARHGEF7;ARHGEF7;ARHGEF7	122122	plus	S
cg14074878	90320	3.03395e-06	0.00459332	0.0173235	chr13	113696482	MCF2L;MCF2L	123433	plus	S
cg23059304	90838	4.14173e-05	0.0413647	0.0940767	chr14	29253725	C14orf23	126399	plus	S
cg08562291	92338	4.85894e-10	1.70643e-06	0.0793584	chr14	69865314	SLC39A9;ERH	130627	plus	S
cg06596955	92615	1.27956e-05	0.0155307	0.00732171	chr14	74416976	COQ6;COQ6;COQ6;FAM161B	131407	plus	S
cg23188263	93013	7.69285e-06	0.009988	0.192822	chr14	81408124		132583	plus	S
cg24034005	93711	3.0271e-09	8.70453e-06	0.0308343	chr14	97059192		134571	plus	S
cg18141891	93983	1.11993e-08	2.98037e-05	0.0385433	chr14	101350645	MIR136;RTL1;MIR432	135508	plus	S
cg04527220	94408	5.0491e-06	0.00711616	0.00944744	chr14	105521961	GPR132	137685	plus	S
cg03480583	96908	2.95465e-05	0.0318075	0.018217	chr15	68524819		145647	plus	S
cg02250241	97460	9.83586e-06	0.0125051	0.00453865	chr15	75648987	MAN2C1	147296	plus	S
cg05866545	99051	1.79847e-06	0.00290779	0.0188639	chr16	911857	LMF1	153015	plus	S
cg16711517	99231	2.13418e-07	0.000419451	0.0237931	chr16	2570260	AMDHD2;AMDHD2	155219	plus	S
cg09621330	101350	1.82201e-05	0.0207619	0.369381	chr16	54685651		162492	plus	S
cg07397481	102679	1.35881e-05	0.0163536	0.014646	chr16	81927366	PLCG2	166931	plus	S
cg05678789	102966	2.87898e-09	8.33455e-06	0.0133665	chr16	85529938		167919	plus	S
cg06758158	103418	3.92081e-05	0.0393417	0.0491554	chr16	89114156		170465	plus	S
cg20663777	103420	1.16895e-05	0.0144335	0.0495635	chr16	89127605		170494	plus	S
cg10958086	103692	9.99976e-08	0.000214901	0.00703829	chr17	952903	ABR;ABR;ABR	172169	plus	S
cg02659149	103781	2.92012e-06	0.00448438	0.01323	chr17	1620008	C17orf91;C17orf91;WDR81;C17orf91;C17orf91;WDR81	172621	plus	S
cg12650267	103952	1.57127e-08	4.00725e-05	0.0198114	chr17	3558212	CTNS;CTNS	173406	plus	S
cg24136700	104913	9.70801e-11	3.92401e-07	0.411119	chr17	17696044	RAI1	177589	plus	S
cg24931355	104913	9.42088e-08	0.000204895	0.360928	chr17	17696392	RAI1	177590	plus	S
cg09186408	104916	8.77746e-07	0.00148061	0.0111559	chr17	17717967	MIR33B;SREBF1;SREBF1	177634	plus	S
cg09632029	105001	3.55271e-13	2.08518e-09	0.00965819	chr17	18855506	SLC5A10;SLC5A10;SLC5A10;SLC5A10	177944	plus	S
cg26683252	107235	2.87975e-05	0.0311576	0.031521	chr17	54802123		187237	plus	S
cg18392085	107778	6.19019e-10	2.0908e-06	0.0164442	chr17	63556315	AXIN2	189105	plus	S
cg10427040	108465	5.29405e-09	1.48253e-05	0.032593	chr17	74261306	FAM100B;FAM100B	191406	plus	S
cg04256065	108672	1.2906e-05	0.0155765	0.0372722	chr17	76102509	TNRC6C;TNRC6C	192219	plus	S
cg22280238	109044	3.10223e-11	1.3031e-07	0.00941498	chr17	79251323	SLC38A10;SLC38A10	194658	plus	S
cg11950105	109142	4.01569e-06	0.00581264	0.00569057	chr17	80050646	FASN	195699	plus	S
cg14133708	109310	4.37125e-05	0.0434544	0.121522	chr18	2846834	EMILIN2	197138	plus	S
cg19447984	110626	4.55121e-06	0.0064356	0.0153195	chr19	897424	C19orf22	203066	plus	S
cg26243751	111664	6.05021e-06	0.00825654	0.0942451	chr19	11495794	EPOR	209403	plus	S
cg03302259	111684	1.51989e-05	0.0177925	0.0767392	chr19	11689855	ACP5;ACP5;ACP5;ACP5	209562	plus	S
cg05209525	112243	1.40791e-05	0.0168029	0.00573626	chr19	18255980	MAST3	212553	plus	S
cg25411508	112416	5.9952e-15	5.03662e-11	0.0125748	chr19	19764685	ATP13A1	213490	plus	S
cg18154014	112926	4.87569e-07	0.000874064	0.151559	chr19	37997991	ZNF793	215900	plus	S
cg14341834	112992	1.73799e-07	0.000356292	0.0101229	chr19	38976465	RYR1;RYR1	216245	plus	S
cg20690695	113156	2.00004e-07	0.000399947	0.00789635	chr19	40873973	PLD3;PLD3	217022	plus	S
cg12486308	113187	1.01764e-06	0.00168345	0.0171853	chr19	41106351	LTBP4;LTBP4;LTBP4	217218	plus	S
cg01550963	113542	3.42421e-05	0.0356097	0.0684603	chr19	45873902	ERCC2;ERCC2	218998	plus	S
cg26351481	114517	4.45554e-05	0.0440511	0.0652486	chr19	56458926	NLRP8	224298	plus	S
cg12821876	11894	7.41527e-06	0.00971593	0.0139762	chr2	496855		225796	plus	S
cg11044724	12272	4.57955e-05	0.045003	0.0298683	chr2	7005733	CMPK2	227322	plus	S
cg03269045	13248	2.12213e-06	0.00335511	0.0140297	chr2	26680478	OTOF;OTOF;OTOF;OTOF	230078	plus	S
cg01313320	14295	4.60334e-05	0.0450583	0.0343642	chr2	46526265	EPAS1	232982	plus	S
cg25681618	15399	3.20494e-05	0.0336562	0.0212225	chr2	71454280	PAIP2B	236028	plus	S
cg26107312	15579	6.24582e-07	0.00109594	0.062095	chr2	74685459	WBP1	236743	plus	S
cg04707348	16208	2.30204e-07	0.000448327	0.0106264	chr2	98351548	ZAP70;ZAP70	238919	plus	S
cg17032565	16833	9.63777e-09	2.58084e-05	0.0137446	chr2	110260096	SH3RF3	240536	plus	S
cg18669186	17138	7.74278e-06	0.0100224	0.0902488	chr2	119614594		241457	plus	S
cg07949777	17486	2.22045e-15	1.982e-11	0.00964357	chr2	128388876	MYO7B	242475	plus	S
cg03340307	18178	5.21568e-07	0.000927255	0.0673854	chr2	148747824	ORC4L;ORC4L;ORC4L	244062	plus	S
cg04928692	19224	1.81246e-09	5.54685e-06	0.0505456	chr2	176042976	ATP5G3;ATP5G3	246762	plus	S
cg02694990	19814	1.44235e-08	3.72279e-05	0.0945777	chr2	197001634	STK17B	248555	plus	S
cg00311772	22245	1.92284e-05	0.0216599	0.0608964	chr2	242092919	PPP1R7	256427	plus	S
cg23840860	22286	1.92609e-05	0.0216599	0.0107565	chr2	242572608	THAP4	256649	plus	S
cg11748417	115229	2.20611e-05	0.0244292	0.00549342	chr20	18548094	LOC388789	259262	plus	S
cg19753867	115683	5.69796e-09	1.57505e-05	0.298059	chr20	35383166	DSN1;DSN1;DSN1;DSN1;DSN1	261472	plus	S
cg11398158	115780	1.87875e-10	7.06104e-07	0.121787	chr20	37590618	DHX35	262067	plus	S
cg27650212	116016	2.44362e-08	5.95667e-05	0.0194506	chr20	45280414	SLC13A3;SLC13A3	263300	plus	S
cg00824806	117382	5.92966e-07	0.00104551	0.0272924	chr21	46350872		269844	plus	S
cg11734009	117747	5.14761e-06	0.00723121	0.0286876	chr22	20847174	KLHL22	271521	plus	S
cg27532867	117748	2.89547e-05	0.0312489	0.0228142	chr22	20862084	MED15;MED15	271543	plus	S
cg10279254	118070	1.88152e-05	0.0213266	0.00855991	chr22	29445370	ZNRF3	272800	plus	S
cg05800641	118590	6.66134e-16	6.34241e-12	0.0072437	chr22	40075186	CACNA1I;CACNA1I	275223	plus	S
cg25905648	24240	5.14057e-05	0.0498304	0.0133131	chr3	45731240	SACM1L	283676	plus	S
cg10769017	24461	5.53011e-08	0.000126032	0.0138808	chr3	48658346	TMEM89	284534	plus	S
cg04411342	27617	4.31611e-05	0.043006	0.144209	chr3	133103339	TMEM108;TMEM108	293467	plus	S
cg20979003	27999	3.13063e-05	0.0332013	0.020375	chr3	141205767	RASA2	294684	plus	S
cg11607276	28009	7.45744e-06	0.0097414	0.033252	chr3	141456799	RNF7;RNF7	294712	plus	S
cg16306190	28822	5.25985e-06	0.00733641	0.0107388	chr3	169530268	LRRC34	297075	plus	S
cg14112754	29986	3.84821e-05	0.0388865	0.191836	chr3	194118613	GP5	300176	plus	S
cg06175036	30345	1.70339e-05	0.0195141	0.00645357	chr4	846732	GAK	301725	plus	S
cg21258377	30546	3.98162e-08	9.37333e-05	0.00991454	chr4	2833418	SH3BP2;SH3BP2;SH3BP2;SH3BP2	303441	plus	S
cg26187965	31983	1.04004e-07	0.000221696	0.0415329	chr4	41694494	LIMCH1;LIMCH1;LIMCH1;LIMCH1;LIMCH1	308112	plus	S
cg03712062	32443	4.47796e-05	0.0441058	0.0428664	chr4	62359523		309588	plus	S
cg24978835	32780	8.5919e-06	0.0110217	0.129406	chr4	76912244	SDAD1	310385	plus	S
cg10518961	34018	3.37715e-07	0.000629112	0.0478962	chr4	119759897		313821	plus	S
cg17456522	37901	5.73137e-06	0.0079214	0.0593326	chr5	54786453	PPAP2A;PPAP2A	325659	plus	S
cg13034654	38263	4.23674e-07	0.000772449	0.017057	chr5	64859130	CENPK;PPWD1;PPWD1	326484	plus	S
cg11039808	38754	2.58706e-05	0.0282046	0.0254459	chr5	77591002	AP3B1	327959	plus	S
cg17456851	38793	6.10301e-06	0.0082749	0.0409721	chr5	78090622	ARSB	328034	plus	S
cg07464250	39946	4.19684e-08	9.78689e-05	0.066063	chr5	118738381		330957	plus	S
cg04693701	40194	1.73309e-07	0.000356292	0.0243264	chr5	125934946		331489	plus	S
cg03851984	41292	4.88298e-05	0.0476569	0.0111454	chr5	146258354	PPP2R2B;PPP2R2B;PPP2R2B;PPP2R2B;PPP2R2B;PPP2R2B;PPP2R2B;PPP2R2B	335590	plus	S
cg18650827	41493	2.72744e-05	0.0295844	0.0772753	chr5	149550508	CDX1	336117	plus	S
cg00245854	41559	3.05072e-05	0.0325149	0.0708809	chr5	150138895	DCTN4;DCTN4;DCTN4	336381	plus	S
cg07927484	41715	1.87162e-05	0.0212707	0.024334	chr5	153826296	SAP30L;SAP30L;SAP30L;SAP30L	336783	plus	S
cg03425782	44321	3.3448e-05	0.0348685	0.103518	chr6	19181082		344992	plus	S
cg11028769	44576	2.04531e-05	0.0228805	0.0348679	chr6	25138951	CMAH;CMAH	345547	plus	S
cg24990422	44920	1.65841e-05	0.019101	0.00525175	chr6	28890682	TRIM27	347615	plus	S
cg26138460	45090	3.59056e-05	0.0367158	0.0974835	chr6	31055502		351136	plus	S
cg05745748	45321	4.62378e-08	0.00010651	0.0124067	chr6	33996013	GRM4	357906	plus	S
cg01477319	47740	5.27386e-06	0.00733641	0.0909723	chr6	107531017	PDSS2	365223	plus	S
cg13432616	48144	3.23947e-05	0.0338529	0.0094154	chr6	116575314	TSPYL4	366326	plus	S
cg12882103	48266	7.16072e-06	0.00944014	0.190303	chr6	119672375	MAN1A1	366712	plus	S
cg19712745	48574	4.44299e-07	0.000803216	0.0769196	chr6	131275789	EPB41L2;EPB41L2;EPB41L2	367445	plus	S
cg16241884	48809	2.1144e-05	0.0235918	0.018467	chr6	135818539	AHI1;C6orf217;AHI1;AHI1;AHI1	368045	plus	S
cg09428340	50150	2.40919e-05	0.0265355	0.327018	chr6	163570371	PACRG;PACRG;PACRG	371600	plus	S
cg21916557	50455	1.3625e-07	0.000283384	0.0117207	chr6	168122636		372627	plus	S
cg14085527	50843	3.69538e-11	1.52168e-07	0.376112	chr7	1068230	C7orf50;C7orf50;C7orf50	375285	plus	S
cg04925511	50900	1.08155e-06	0.00177546	0.0131182	chr7	1468382		375873	plus	S
cg00457258	50907	9.41193e-10	3.05499e-06	0.0111783	chr7	1520879	INTS1	375957	plus	S
cg09329079	50912	2.76307e-07	0.000528504	0.0103	chr7	1582834	TMEM184A	376075	plus	S
cg07190543	51446	1.14066e-05	0.0141249	0.0427062	chr7	8261154	ICA1;ICA1;ICA1	379334	plus	S
cg26796083	51550	3.55506e-05	0.0365272	0.116911	chr7	13985664	ETV1;ETV1;ETV1;ETV1;ETV1;ETV1;ETV1	379601	plus	S
cg00930244	52708	1.22369e-05	0.0149799	0.0599002	chr7	39870522		383241	plus	S
cg19784477	54602	2.69121e-05	0.0292655	0.055013	chr7	93519401	TFPI2	388536	plus	S
cg00729656	54808	4.19872e-06	0.00603678	0.0787093	chr7	98552702	TRRAP	389469	plus	S
cg13627256	54883	7.3351e-06	0.00964037	0.011805	chr7	99214534	ZNF498	389843	plus	S
cg01971483	55667	8.47883e-07	0.00144159	0.0280167	chr7	116166408	CAV1	392454	plus	S
cg24770985	55667	3.20271e-05	0.0336562	0.0081113	chr7	116166421	CAV1	392455	plus	S
cg02000032	56250	3.41329e-06	0.00507828	0.046611	chr7	130563521	MIR29B1	394248	plus	S
cg15227302	56524	0	0	0.418688	chr7	135195347	CNOT4;CNOT4	394827	plus	S
cg16930768	56935	3.23232e-06	0.00485931	0.0111046	chr7	142960502	GSTK1;GSTK1;GSTK1;GSTK1	395977	plus	S
cg04619437	57555	3.10032e-06	0.00467728	0.0269612	chr7	156464370	RNF32	398698	plus	S
cg03104808	57876	2.16251e-09	6.50559e-06	0.01609	chr8	652622	ERICH1	400836	plus	S
cg21418104	57953	2.0535e-06	0.00326428	0.051253	chr8	1276961		401351	plus	S
cg17090954	57964	8.4187e-10	2.75346e-06	0.0162206	chr8	1364458		401451	plus	S
cg25284208	58903	2.02232e-05	0.0226825	0.0271866	chr8	22103139	POLR3D;MIR320A	404539	plus	S
cg12634446	60636	2.84422e-07	0.000541609	0.0368547	chr8	67026411		409782	plus	S
cg04703844	60896	1.62653e-05	0.0187843	0.0697748	chr8	74207197	RPL7;RDH10	410549	plus	S
cg18894440	60972	2.57466e-05	0.028141	0.27498	chr8	76321233		410749	plus	S
cg12686915	62217	1.66618e-11	7.51455e-08	0.414962	chr8	117768332	EIF3H	413962	plus	S
cg16721257	62853	1.05993e-07	0.000224452	0.0716121	chr8	130954845		415330	plus	S
cg10199770	63404	2.30068e-07	0.000448327	0.00574702	chr8	143152889		416966	plus	S
cg09125402	63683	1.60427e-05	0.0185773	0.0117858	chr8	145770981	KIAA1688	419260	plus	S
cg14399863	63747	4.22215e-06	0.00605017	0.0726141	chr9	707166	KANK1;KANK1;KANK1	419594	plus	S
cg21388169	64394	0	0	0.388288	chr9	71651175	FXN;FXN;FXN	421319	plus	S
cg14656297	64394	2.00695e-07	0.000399947	0.40626	chr9	71651331	FXN;FXN;FXN	421320	plus	S
cg14558431	64684	2.11298e-12	1.11767e-08	0.0726793	chr9	89763370	C9orf170	421976	plus	S
cg14402574	65252	3.29833e-06	0.0049412	0.00826638	chr9	108421903		423393	plus	S
cg13407601	66849	1.50448e-05	0.01768	0.0190537	chr9	140615230	EHMT1;EHMT1	428353	plus	S

## Sheet: BWS15_hyper
row.names	regionID	Pvalue_M	AdjustedPvalue_M	Betadif	chr	pos	Genename	Index	direction	significance
cg18114463	70	1.07774e-05	0.0120879	0.0603104	chr1	1476551	C1orf70	1126	plus	S
cg01520454	160	2.2077e-05	0.0216948	0.0738041	chr1	2304375	MORN1	2141	plus	S
cg08091596	517	3.52054e-05	0.0314247	0.0735349	chr1	6530743	PLEKHG5;PLEKHG5;PLEKHG5;PLEKHG5;PLEKHG5	4866	plus	S
cg22529900	669	1.31932e-05	0.0142384	0.00831446	chr1	8044553	PARK7;PARK7	5410	plus	S
cg17477995	674	1.77636e-15	2.11413e-11	0.398203	chr1	8085641	ERRFI1	5426	plus	S
cg17602885	870	9.482e-09	2.12701e-05	0.00634662	chr1	9804627	CLSTN1;CLSTN1	6073	plus	S
cg00700041	1210	4.59428e-05	0.0386726	0.0603114	chr1	13843911		7274	plus	S
cg11821759	1947	3.95112e-06	0.00519285	0.070185	chr1	22155384	HSPG2	9710	plus	S
cg00891459	2073	9.55328e-06	0.0109735	0.030508	chr1	23670936	HNRNPR;HNRNPR;HNRNPR;HNRNPR	10099	plus	S
cg00703260	2297	2.03011e-05	0.0202281	0.00967042	chr1	26372895	SLC30A2;SLC30A2	11027	plus	S
cg06060497	2960	1.77327e-05	0.017919	0.0852385	chr1	35569491	ZMYM1	13807	plus	S
cg19150666	4856	1.13316e-07	0.000205723	0.0534671	chr1	67391091	MIER1;WDR78;MIER1;MIER1;MIER1;MIER1;MIER1;MIER1;WDR78;MIER1	20175	plus	S
cg02341559	4870	1.03086e-08	2.28848e-05	0.050091	chr1	67603174		20220	plus	S
cg24603152	5258	4.09814e-11	1.55386e-07	0.144844	chr1	84543539	PRKACB;PRKACB	21191	plus	S
cg16011679	5328	1.17857e-06	0.00174125	0.0488792	chr1	85725395	C1orf52;C1orf52	21422	plus	S
cg04543026	6138	1.53055e-06	0.00220056	0.0410451	chr1	110453888	CSF1;CSF1;CSF1;CSF1	23925	plus	S
cg07362231	6696	4.14102e-06	0.0053928	0.066495	chr1	120441702		25790	plus	S
cg19806021	7286	4.23644e-06	0.00546722	0.00976554	chr1	155197502	GBAP1	28575	plus	S
cg04092332	7425	8.57803e-10	2.50019e-06	0.0532133	chr1	156669575	CRABP2	29357	plus	S
cg11232156	7510	5.10718e-06	0.00647392	0.0847585	chr1	158035207	KIRREL	29696	plus	S
cg14512089	7678	3.36269e-08	6.63943e-05	0.00833378	chr1	160771850	LY9;LY9	30299	plus	S
cg16597665	8867	9.71935e-06	0.0110752	0.118261	chr1	185013658	RNF2	33643	plus	S
cg04640821	10433	2.56705e-08	5.16366e-05	0.160789	chr1	222638561		38172	plus	S
cg24053642	10441	9.37863e-06	0.010807	0.0249263	chr1	222791799	MIA3	38215	plus	S
cg08274718	10453	3.01991e-06	0.00410759	0.0730509	chr1	222986051		38254	plus	S
cg18289048	10582	3.0867e-05	0.0285562	0.012247	chr1	225615672	LBR;LBR;LBR	38597	plus	S
cg06837355	10965	7.83171e-11	2.72807e-07	0.018675	chr1	231004185	C1orf198;C1orf198	40117	plus	S
cg20652759	66908	7.14275e-09	1.70019e-05	0.0739469	chr10	409280	DIP2C	42759	plus	S
cg17404397	67633	1.32758e-05	0.0142916	0.0662697	chr10	12174728	SEC61A2;SEC61A2;SEC61A2;SEC61A2;SEC61A2	45504	plus	S
cg15248304	68863	3.57356e-05	0.0317656	0.006484	chr10	44102227	ZNF485	48874	plus	S
cg01071279	69736	1.7683e-06	0.00250663	0.0626126	chr10	70939636	SUPV3L1	51170	plus	S
cg01089095	70103	4.06754e-06	0.00532942	0.0137752	chr10	75541668	CHCHD1	52319	plus	S
cg17071648	70103	3.12133e-05	0.0287601	0.00724438	chr10	75545507	KIAA0913	52331	plus	S
cg15364725	70961	1.15688e-05	0.0127421	0.0409751	chr10	92617429	HTR7;HTR7;HTR7;HTR7;HTR7;HTR7	54426	plus	S
cg16300509	71530	3.24976e-11	1.2774e-07	0.0710803	chr10	102280155	SEC31B	56361	plus	S
cg09019052	72686	7.65845e-07	0.00120635	0.070303	chr10	124639167	LOC399815;FAM24B	60269	plus	S
cg06897927	72700	6.0536e-05	0.0477037	0.0104342	chr10	124895500	HMX3	60347	plus	S
cg23096663	73266	5.25947e-07	0.000856819	0.0502228	chr10	133602000		62444	plus	S
cg07249433	73365	2.11355e-08	4.31218e-05	0.0194261	chr10	134420183	INPP5A	63185	plus	S
cg16832975	73387	1.89163e-10	6.23442e-07	0.0179613	chr10	134593532	INPP5A	63456	plus	S
cg04458206	73455	9.19667e-06	0.0106685	0.0540866	chr10	135204501	PAOX;PAOX;PAOX	64614	plus	S
cg18792041	73514	2.13584e-05	0.0210854	0.0439788	chr11	431774	ANO9	65059	plus	S
cg15796682	73523	2.53945e-05	0.0242324	0.0292016	chr11	506809	RNH1;RNH1;RNH1;RNH1;RNH1;RNH1;RNH1;RNH1;RNH1;RNH1;RNH1;RNH1	65169	plus	S
cg14304349	73979	1.46946e-05	0.015356	0.328869	chr11	5617812	TRIM6;TRIM6-TRIM34;TRIM6	68724	plus	S
cg19496491	74493	2.73688e-05	0.0258287	0.0138842	chr11	12695499	TEAD1	70229	plus	S
cg16201963	75083	6.90128e-06	0.00835276	0.0253056	chr11	27528006	BDNFOS;LIN7C	71932	plus	S
cg06325565	76578	5.97952e-05	0.0475314	0.119214	chr11	63889842	MACROD1	77373	plus	S
cg09854726	76594	1.33994e-05	0.0143885	0.0842622	chr11	64007569	FKBP2;FKBP2	77477	plus	S
cg24497897	76816	1.77113e-05	0.017919	0.0496507	chr11	65658826	CCDC85B	78965	plus	S
cg12441052	76879	2.2976e-05	0.022424	0.040803	chr11	66313700	ZDHHC24;ACTN3	79466	plus	S
cg08139833	77028	1.48538e-05	0.0154469	0.0150718	chr11	67798212	NDUFS8	80390	plus	S
cg18784409	77036	2.33236e-05	0.0226088	0.230574	chr11	67868331	CHKA;CHKA	80437	plus	S
cg27090024	77038	8.41406e-08	0.000157425	0.0352048	chr11	67889237	CHKA;CHKA	80451	plus	S
cg03717994	77545	5.14137e-06	0.00649803	0.0494647	chr11	73114164		82455	plus	S
cg23705113	77883	1.3757e-05	0.0146259	0.0684711	chr11	77774867	THRSP	83479	plus	S
cg07258532	78950	2.939e-05	0.027434	0.0746048	chr11	111640893		86241	plus	S
cg19269323	79739	3.32539e-05	0.0300585	0.0933817	chr11	122752590	C11orf63;C11orf63	88662	plus	S
cg20959106	79985	1.36785e-06	0.00199339	0.0687979	chr11	125933690	CDON	89477	plus	S
cg12554051	80647	2.52795e-05	0.0241765	0.00482898	chr12	665863	B4GALNT3	91360	plus	S
cg15321979	80894	2.21686e-07	0.000386106	0.0616888	chr12	3541067		92096	plus	S
cg06077899	82255	1.45462e-07	0.000259682	0.0982963	chr12	32832894	DNM1L;DNM1L;DNM1L	96159	plus	S
cg02693438	82303	1.35109e-05	0.0144359	0.012191	chr12	38557136		96389	plus	S
cg20737266	83299	2.42666e-05	0.023415	0.0354125	chr12	56519965		100513	plus	S
cg00364557	85308	5.26907e-05	0.0432481	0.0544844	chr12	109524566	USP30	106161	plus	S
cg25683752	85397	1.06912e-05	0.0120544	0.0182601	chr12	110437188	ANKRD13A	106493	plus	S
cg00767953	86331	3.51131e-05	0.0314078	0.0604996	chr12	124421382	CCDC92	110131	plus	S
cg21236379	86866	9.38304e-06	0.010807	0.00640378	chr12	132328596	MMP17	112095	plus	S
cg04295991	87102	1.53844e-05	0.015845	0.0742652	chr13	21348012	N6AMT2;N6AMT2	113923	plus	S
cg09409126	87144	4.97649e-09	1.23248e-05	0.0170714	chr13	21834960		114050	plus	S
cg18469224	87579	6.62919e-06	0.00805333	0.0687883	chr13	29160247		115353	plus	S
cg17926458	89355	4.39899e-07	0.000730528	0.0179228	chr13	92000673	MIR17HG;MIR17HG	119796	plus	S
cg22114393	89877	3.45279e-12	1.541e-08	0.0671369	chr13	107185511	EFNB2	121259	plus	S
cg11779118	89930	2.3967e-07	0.000414061	0.0728044	chr13	108487481	FAM155A	121364	plus	S
cg21552701	90054	2.28729e-09	6.20251e-06	0.0170723	chr13	111090453	COL4A2	121724	plus	S
cg07364729	90227	1.24443e-05	0.0135325	0.0771006	chr13	112786612		122591	plus	S
cg09714789	90286	5.99853e-05	0.0475942	0.169746	chr13	113422497	ATP11A;ATP11A	123002	plus	S
cg17991430	90372	2.47891e-10	7.92609e-07	0.0122816	chr13	114083000	ADPRHL1;ADPRHL1	123848	plus	S
cg11992426	90407	6.23544e-10	1.86825e-06	0.0152329	chr13	114764890	RASA3	124201	plus	S
cg09835220	90948	5.68353e-05	0.0458592	0.0516416	chr14	34021446	NPAS3;NPAS3;NPAS3;NPAS3	126673	plus	S
cg16239826	90988	2.26217e-05	0.022155	0.0230942	chr14	35017319		126751	plus	S
cg06603113	91027	3.95734e-05	0.0348737	0.00677026	chr14	36003367	INSM2;INSM2	126896	plus	S
cg07667295	92022	5.63802e-05	0.0455779	0.0972055	chr14	64320118	SYNE2;SYNE2	129763	plus	S
cg10990040	92693	2.94787e-08	5.90199e-05	0.027188	chr14	75423113	PGF	131684	plus	S
cg19937378	93491	2.3012e-06	0.00320559	0.0697196	chr14	94088174	KIAA1409	133904	plus	S
cg26372254	93622	1.12617e-06	0.00168122	0.0495194	chr14	95942827	C14orf49	134332	plus	S
cg04846720	94151	6.21349e-06	0.00769419	0.0928509	chr14	103295640	TRAF3;TRAF3;TRAF3	136400	plus	S
cg18124009	94465	7.87351e-09	1.80397e-05	0.0114897	chr14	105917213	MTA1	138044	plus	S
cg08096582	95212	5.2682e-05	0.0432481	0.0178387	chr15	38545041	SPRED1	140521	plus	S
cg25831214	95683	3.68718e-06	0.00492144	0.0788478	chr15	45607227		142294	plus	S
cg19135536	95817	1.58701e-08	3.34954e-05	0.276877	chr15	49267992		142637	plus	S
cg27177196	96402	2.97694e-05	0.0277278	0.043443	chr15	62654592		144238	plus	S
cg27140083	97430	7.87145e-06	0.00934224	0.00781417	chr15	75230280	COX5A	147164	plus	S
cg13301155	97915	5.54051e-05	0.0450446	0.0164334	chr15	82338574	MEX3B	148583	plus	S
cg25290178	98505	5.61392e-05	0.0454742	0.236449	chr15	93591806	RGMA;RGMA;RGMA;RGMA;RGMA;RGMA	150542	plus	S
cg13990585	98507	5.78575e-05	0.046335	0.0604823	chr15	93598797	RGMA;RGMA;RGMA;RGMA;RGMA;RGMA	150547	plus	S
cg18761422	98626	5.46546e-09	1.34363e-05	0.0429131	chr15	96886238		150852	plus	S
cg16555142	98996	3.21154e-07	0.00054603	0.0115163	chr16	432566	TMEM8A;LOC100134368	152263	plus	S
cg06297356	99063	2.62055e-05	0.0248954	0.0142994	chr16	1012735	LMF1	153164	plus	S
cg06093201	99099	5.29933e-05	0.0433304	0.0284533	chr16	1405095	GNPTG	153817	plus	S
cg08526784	99145	6.78503e-07	0.00108069	0.00843219	chr16	1811246	MAPK8IP3;MAPK8IP3	154380	plus	S
cg04875007	99166	1.29014e-05	0.0139587	0.0738838	chr16	2014871	SNHG9;SNORA78;RPS2	154600	plus	S
cg08888410	99307	1.1064e-11	4.64747e-08	0.0089798	chr16	3139991	ZSCAN10	155719	plus	S
cg03379706	99389	5.36829e-06	0.00674505	0.106216	chr16	3740882	TRAP1	156146	plus	S
cg01722994	99725	3.53815e-05	0.0315163	0.0186392	chr16	10277317	GRIN2A;GRIN2A;GRIN2A	157275	plus	S
cg14510333	101217	3.47176e-08	6.82332e-05	0.0624745	chr16	51168503		162118	plus	S
cg02096434	101278	9.01367e-07	0.00137926	0.00791067	chr16	53088772	CHD9	162267	plus	S
cg08217581	101898	5.96645e-06	0.0074097	0.0323187	chr16	67515036	ATP6V0D1;ATP6V0D1	164416	plus	S
cg26796563	101965	1.96769e-05	0.0196977	0.0373146	chr16	68344861	PRMT7;SLC7A6OS;SLC7A6OS	164845	plus	S
cg07520163	102378	4.66898e-05	0.0392242	0.216587	chr16	75232227		166145	plus	S
cg02566611	102749	1.08484e-08	2.38361e-05	0.0128821	chr16	83948975	MLYCD	167093	plus	S
cg27279545	102988	6.23173e-05	0.0489011	0.0906962	chr16	85667222	KIAA0182;KIAA0182	168059	plus	S
cg04988673	103344	4.20119e-06	0.0054381	0.00973699	chr16	88520037	ZFPM1;ZFPM1	169696	plus	S
cg10155891	103400	1.27227e-11	5.29231e-08	0.0105041	chr16	88941576	CBFA2T3;CBFA2T3	170215	plus	S
cg01896926	103649	5.31107e-06	0.00669277	0.0605625	chr17	685509	GLOD4;GLOD4;RNMTL1	171875	plus	S
cg17812026	103764	1.16351e-13	7.6694e-10	0.00919521	chr17	1494379	SLC43A2	172496	plus	S
cg12229632	103877	3.75255e-14	2.77206e-10	0.00814781	chr17	2607906	KIAA0664	173112	plus	S
cg00220413	104261	1.40815e-05	0.0148602	0.010415	chr17	7319074	NLGN2	175082	plus	S
cg25953958	104395	3.35179e-07	0.000567623	0.0725098	chr17	8485965	MYH10	176064	plus	S
cg02400773	104653	6.63509e-06	0.00805333	0.0839509	chr17	13502304	HS3ST3A1	176806	plus	S
cg02435345	104694	2.64519e-06	0.0036209	0.0771527	chr17	14749786		176945	plus	S
cg03746765	104716	3.79346e-06	0.00501641	0.0576092	chr17	15288099		177008	plus	S
cg22176097	105341	4.25504e-06	0.00547473	0.0690759	chr17	27229885	DHRS13	179205	plus	S
cg01305045	105464	5.71445e-05	0.046022	0.0158984	chr17	29233673	C17orf42	179666	plus	S
cg10535845	106000	2.45753e-05	0.0236084	0.0500503	chr17	37821481	TCAP	181690	plus	S
cg00038239	106480	1.39955e-12	6.76746e-09	0.00981848	chr17	42090466	TMEM101	183897	plus	S
cg18687753	107901	3.15509e-05	0.0290087	0.0909392	chr17	65850416	BPTF;BPTF	189397	plus	S
cg04643858	108224	2.41826e-06	0.0033403	0.00505914	chr17	72278043	DNAI2	190180	plus	S
cg00715047	108366	2.08722e-08	4.29941e-05	0.0316914	chr17	73522054	LLGL2;LLGL2;LLGL2	190907	plus	S
cg10427040	108465	1.34428e-05	0.014399	0.0150086	chr17	74261306	FAM100B;FAM100B	191404	plus	S
cg06577463	108902	6.95076e-06	0.00836538	0.0633454	chr17	78120714	EIF4A3	193534	plus	S
cg08373023	109025	1.03405e-10	3.54434e-07	0.02389	chr17	79114804	AATK	194495	plus	S
cg21235925	109229	7.4162e-09	1.75396e-05	0.0124682	chr17	80678270	FN3KRP	196344	plus	S
cg09781304	109251	1.55067e-09	4.36077e-06	0.0124903	chr17	80887954	TBCD	196663	plus	S
cg13133420	109660	1.32313e-08	2.83451e-05	0.0182535	chr18	21718863	CABYR;CABYR;CABYR;CABYR;CABYR;CABYR	198588	plus	S
cg12692042	109738	3.67822e-06	0.00492144	0.0148657	chr18	30050872	FAM59A	198966	plus	S
cg07020962	109765	3.6009e-05	0.0319128	0.016408	chr18	32621292	MAPRE2;MAPRE2;MAPRE2;MAPRE2	199111	plus	S
cg04407853	109806	3.75255e-14	2.77206e-10	0.061524	chr18	33878230	FHOD3	199296	plus	S
cg22433261	109988	1.19374e-05	0.0130809	0.0278438	chr18	47813856	CXXC1;CXXC1	200061	plus	S
cg23319171	110332	9.64453e-06	0.0110487	0.0818615	chr18	74804128	MBP;MBP	201536	plus	S
cg21089065	110450	8.63248e-07	0.00133142	0.0366008	chr18	77255783	NFATC1;NFATC1;NFATC1;NFATC1	202042	plus	S
cg23837191	110460	0	0	0.364142	chr18	77335239		202096	plus	S
cg14230166	110640	4.70263e-07	0.000771975	0.0108588	chr19	1020974	C19orf6;C19orf6	203201	plus	S
cg25793425	111220	6.37288e-06	0.0078462	0.00907547	chr19	6007842	RFX2;RFX2	207022	plus	S
cg10754777	111998	2.59792e-14	2.0238e-10	0.0131433	chr19	15512044	AKAP8L	211354	plus	S
cg12166435	112108	1.11734e-06	0.00167974	0.0809239	chr19	16940037	SIN3B	211787	plus	S
cg13705810	112153	5.28257e-05	0.0432759	0.0733313	chr19	17556074		212112	plus	S
cg26159030	112793	2.9591e-11	1.18489e-07	0.00915027	chr19	36214806	MLL4	215193	plus	S
cg23525514	113401	1.15804e-06	0.00171684	0.0302544	chr19	44259148	C19orf61	218316	plus	S
cg02872930	113520	5.80656e-05	0.0464149	0.220337	chr19	45649752		218868	plus	S
cg20208858	113901	4.3861e-09	1.12529e-05	0.0404414	chr19	49865767	DKKL1;TEAD2	221076	plus	S
cg10628276	114164	0	0	0.739868	chr19	52430632	ZNF613;ZNF613	222513	plus	S
cg00368987	114597	6.66125e-07	0.00106893	0.0219671	chr19	57703364	ZNF264	224695	plus	S
cg03232443	11947	3.2914e-05	0.0299407	0.0785725	chr2	949687	SNTG2	226035	plus	S
cg23421509	12375	5.15499e-05	0.0424744	0.0227834	chr2	8978201	KIDINS220	227598	plus	S
cg17050100	13362	1.09014e-05	0.0121951	0.0435975	chr2	27852231	GPN1;CCDC121;GPN1;CCDC121;GPN1;GPN1;CCDC121;GPN1	230663	plus	S
cg17492041	13377	3.18538e-05	0.0291621	0.0162135	chr2	27994540	MRPL33;MRPL33	230719	plus	S
cg20677521	13589	8.98005e-06	0.0105412	0.0613074	chr2	32191527	MEMO1;MEMO1	231202	plus	S
cg20949959	14095	3.78263e-06	0.00501641	0.00771	chr2	43453251	ZFP36L2;LOC100129726	232380	plus	S
cg18917495	15522	3.40455e-07	0.000572035	0.0201604	chr2	74006961	DUSP11	236474	plus	S
cg16625916	15726	4.58866e-07	0.000759082	0.0196596	chr2	80085213	CTNNA2;CTNNA2	237236	plus	S
cg18780276	15884	3.35038e-05	0.0302206	0.0400215	chr2	85829672	TMEM150A;TMEM150A;TMEM150A	237678	plus	S
cg16282101	16098	2.1518e-10	6.98444e-07	0.110933	chr2	96068839	FAHD2A	238421	plus	S
cg20738928	16297	9.21306e-06	0.0106685	0.0965916	chr2	99871988	LYG2	239212	plus	S
cg11127732	16602	3.05599e-05	0.0283409	0.0585617	chr2	105653643	MRPS9	239946	plus	S
cg05226506	17106	2.04034e-09	5.60377e-06	0.116292	chr2	118845797	INSIG2	241278	plus	S
cg08726863	17496	2.01348e-05	0.0201091	0.133574	chr2	128458401	SFT2D3	242539	plus	S
cg11040329	17636	3.21348e-06	0.0043433	0.0286551	chr2	131114146	PTPN18;PTPN18	242917	plus	S
cg18029407	17943	7.71239e-07	0.0012104	0.0768931	chr2	138781947		243682	plus	S
cg20453861	18489	7.05955e-06	0.0084725	0.131915	chr2	158687877	ACVR1;ACVR1	244807	plus	S
cg17489939	19248	5.08402e-05	0.0420743	0.204442	chr2	176981919	HOXD10	246969	plus	S
cg13773898	21342	2.74802e-12	1.23937e-08	0.181488	chr2	231712722		252924	plus	S
cg26429694	22175	1.11452e-05	0.0123391	0.0265827	chr2	241526218	CAPN10;CAPN10;CAPN10;CAPN10;CAPN10;CAPN10;CAPN10;CAPN10	256080	plus	S
cg23939932	22298	7.87339e-09	1.80397e-05	0.00972876	chr2	242664240	ING5	256753	plus	S
cg23365723	114959	2.88797e-05	0.0270757	0.0126584	chr20	3224235		258089	plus	S
cg10322504	114960	1.57443e-06	0.00224857	0.0831277	chr20	3229239		258093	plus	S
cg23235297	115081	6.41223e-05	0.049861	0.028922	chr20	8000018	TMX4	258645	plus	S
cg11162385	115378	5.08974e-05	0.0420743	0.0674584	chr20	25604740	NANP	260053	plus	S
cg19695335	115378	4.34872e-05	0.0372199	0.0358918	chr20	25604759	NANP	260055	plus	S
cg19568834	115623	6.24713e-05	0.0489324	0.0307573	chr20	34252926	CPNE1;CPNE1;RBM12;CPNE1;CPNE1;CPNE1;RBM12;CPNE1;CPNE1	261240	plus	S
cg25227755	115770	3.05789e-10	9.56323e-07	0.0548274	chr20	37374470		262009	plus	S
cg09292876	115789	2.71992e-05	0.0257253	0.0418152	chr20	39312434		262094	plus	S
cg01438737	115830	6.54764e-06	0.00799359	0.00914466	chr20	42086396	SFRS6	262269	plus	S
cg03554702	115902	9.51687e-08	0.000175001	0.0172268	chr20	43595206	STK4;STK4	262641	plus	S
cg15473411	116488	3.29129e-05	0.0299407	0.0611338	chr20	61438182	OGFR	265615	plus	S
cg15262992	116489	5.95959e-09	1.4508e-05	0.00594384	chr20	61442882	OGFR	265617	plus	S
cg20024234	117166	5.43932e-05	0.0443903	0.0163875	chr21	43431083	ZNF295;ZNF295;ZNF295	268825	plus	S
cg20341238	117257	1.17224e-05	0.0128782	0.0050953	chr21	44865764		269243	plus	S
cg10099638	117487	3.16223e-05	0.0290122	0.202282	chr21	47517484	COL6A2;COL6A2;COL6A2	270324	plus	S
cg05677630	117800	3.09254e-05	0.0285562	0.113525	chr22	22020012	PPIL2;PPIL2;PPIL2	271785	plus	S
cg24492374	117883	4.30992e-05	0.0371549	0.103076	chr22	24093423	ZNF70	272057	plus	S
cg11188618	118062	8.23061e-07	0.00127769	0.290807	chr22	29196489	XBP1;XBP1	272767	plus	S
cg11408359	118075	7.77125e-06	0.00925765	0.0170132	chr22	29602004	EMID1;EMID1	272834	plus	S
cg12376277	118183	4.8643e-05	0.0406262	0.0265598	chr22	31365812	TUG1	273343	plus	S
cg17800356	118870	3.50457e-05	0.0314078	0.152764	chr22	45593052	C22orf9;C22orf9	276516	plus	S
cg06460553	119060	5.61105e-06	0.00700896	0.127486	chr22	49763530		277348	plus	S
cg09881545	22476	4.07991e-06	0.00532942	0.284475	chr3	5137630		278528	plus	S
cg07351192	22476	3.3749e-07	0.000569286	0.18309	chr3	5137773		278529	plus	S
cg21831931	22476	1.07664e-05	0.0120879	0.121484	chr3	5137953		278530	plus	S
cg02961027	22604	2.20645e-05	0.0216948	0.0444342	chr3	9404532	THUMPD3;THUMPD3	278814	plus	S
cg07047131	22853	1.20541e-05	0.013175	0.0460531	chr3	12856650	CAND2;CAND2	279756	plus	S
cg25092247	23039	4.43937e-05	0.0376987	0.011929	chr3	15140607	ZFYVE20;ZFYVE20	280372	plus	S
cg12829298	23476	1.91644e-07	0.000337902	0.0151347	chr3	29743203	RBMS3;RBMS3;RBMS3	281442	plus	S
cg11946769	24431	7.77858e-06	0.00925765	0.157964	chr3	48343235	NME6	284376	plus	S
cg19888888	25810	1.11207e-05	0.0123391	0.0495487	chr3	74761514		288687	plus	S
cg16588007	27023	1.62292e-05	0.0165953	0.076081	chr3	123300842	PTPLB	291613	plus	S
cg06202903	27174	6.94384e-06	0.00836538	0.0502117	chr3	125434577		291942	plus	S
cg00233756	27240	4.56406e-05	0.0385697	0.0335557	chr3	126373634		292193	plus	S
cg26164278	28040	2.55388e-07	0.000436478	0.069413	chr3	142300190		294818	plus	S
cg11286742	28270	5.75623e-05	0.0462716	0.0696655	chr3	149860152		295547	plus	S
cg04479354	28652	1.39092e-05	0.0147147	0.0171167	chr3	160118184	SMC4;SMC4;IFT80	296604	plus	S
cg09452291	30168	2.42461e-06	0.0033403	0.069655	chr3	196282071	WDR53	300807	plus	S
cg22117062	30537	3.42556e-05	0.0307692	0.0342047	chr4	2794231	SH3BP2	303404	plus	S
cg12214653	30583	1.7121e-11	7.0534e-08	0.0122118	chr4	3263229	C4orf44	303644	plus	S
cg13541552	30618	8.14233e-07	0.00127321	0.0334948	chr4	3510723		303910	plus	S
cg10380931	30634	5.07638e-05	0.0420743	0.0590709	chr4	3671199		304021	plus	S
ch.4.5614630F	30759	1.13432e-08	2.4796e-05	0.0310738	chr4	5563729		304509	plus	S
cg08825286	31123	6.02992e-05	0.0476667	0.0155241	chr4	10089919	WDR1;WDR1	305933	plus	S
cg24168538	31740	4.2577e-05	0.0368787	0.203943	chr4	35527016		307397	plus	S
cg26260386	34513	1.36466e-06	0.00199339	0.0462397	chr4	140477698	SETD7	314999	plus	S
cg16910246	35016	6.34617e-08	0.000120311	0.0695783	chr4	154230468	TRIM2;ANXA2P1;TRIM2	316276	plus	S
cg04821107	35432	4.22951e-05	0.0368451	0.0173216	chr4	170947779	MFAP3L	317437	plus	S
cg10392420	35489	7.18663e-07	0.00114042	0.0634754	chr4	174313503	SCRG1	317577	plus	S
cg02775028	35751	2.37313e-05	0.022952	0.0514366	chr4	184580387	C4orf41;RWDD4A;C4orf41	318361	plus	S
cg15531486	37627	6.05686e-05	0.0477037	0.0728722	chr5	41903939	C5orf51	324754	plus	S
cg13930261	37654	4.32625e-05	0.0371991	0.171813	chr5	42949882		324843	plus	S
cg18353550	37773	9.11901e-06	0.010617	0.00458199	chr5	52405491	MOCS2;MOCS2	325338	plus	S
cg27081877	37773	6.16338e-05	0.0484535	0.00587665	chr5	52405494	MOCS2;MOCS2	325339	plus	S
cg18318639	37773	6.47482e-13	3.51159e-09	0.0154026	chr5	52405666	MOCS2;MOCS2	325343	plus	S
cg06612791	37773	3.10862e-15	3.505e-11	0.0389845	chr5	52405675	MOCS2;MOCS2	325344	plus	S
cg04396495	38150	1.30511e-06	0.00192158	0.0619064	chr5	60626910	ZSWIM6	326203	plus	S
cg10552847	38630	8.38781e-06	0.00990023	0.0205013	chr5	74632966	HMGCR;HMGCR	327518	plus	S
cg05654946	39086	5.7435e-08	0.00010937	0.0507963	chr5	88017891	MEF2C;MEF2C	328853	plus	S
cg19753607	39306	1.01847e-05	0.0115441	0.0713867	chr5	95231593	ELL2	329422	plus	S
cg08293548	39714	6.23699e-07	0.00100461	0.0525344	chr5	112194422		330365	plus	S
cg06302803	40802	4.9863e-05	0.0414834	0.0266928	chr5	138609953	SNHG4;MATR3	333505	plus	S
cg04233747	41239	4.26066e-05	0.0368787	0.0547483	chr5	145214971	PRELID2;PRELID2;PRELID2	335421	plus	S
cg10864596	42903	4.44089e-16	5.94598e-12	0.0630895	chr5	178487382	ZNF354C	340566	plus	S
cg22801980	42965	9.02991e-06	0.0105671	0.0926875	chr5	179042080	HNRNPH1	340801	plus	S
cg03868400	42977	6.3118e-05	0.0491693	0.0300445	chr5	179125946	CANX;CANX;CANX;CANX	340852	plus	S
cg21190644	43321	2.30439e-06	0.00320559	0.130406	chr6	2659375		342262	plus	S
cg11520985	43651	2.43193e-05	0.023415	0.0248959	chr6	7313314	SSR1	343310	plus	S
cg25867210	43811	4.46672e-09	1.13916e-05	0.0445323	chr6	11097536	LOC221710	343913	plus	S
cg07510611	44128	0	0	0.0106234	chr6	15513503	JARID2	344552	plus	S
cg20691507	44928	1.08647e-06	0.00164257	0.0950603	chr6	28956683		347730	plus	S
cg11092416	44970	3.58466e-06	0.0048146	0.289573	chr6	29617549		348248	plus	S
cg20294320	44970	1.38157e-05	0.0146519	0.0725944	chr6	29617586		348249	plus	S
cg17221604	44975	2.31463e-05	0.0225389	0.0805428	chr6	29720989		348495	plus	S
cg18055610	45006	5.38916e-08	0.000103543	0.142301	chr6	30095419		349127	plus	S
cg08548396	45006	1.93179e-14	1.53274e-10	0.124185	chr6	30095549		349130	plus	S
cg12534216	45006	2.64486e-06	0.0036209	0.0808514	chr6	30095570		349131	plus	S
cg16123269	45011	3.80236e-09	9.93374e-06	0.446499	chr6	30135113	TRIM15	349277	plus	S
cg13252226	45011	6.89845e-08	0.000129634	0.442424	chr6	30135162	TRIM15	349278	plus	S
cg09003527	45020	3.199e-11	1.26909e-07	0.0150746	chr6	30309725	TRIM39;TRIM39	349697	plus	S
cg10404697	45159	1.35465e-05	0.0144379	0.114296	chr6	31930718	SKIV2L	353520	plus	S
cg11773537	45171	1.14513e-05	0.0126453	0.0286069	chr6	32137061	AGPAT1;AGPAT1	354467	plus	S
cg18707500	45246	1.42022e-05	0.0149508	0.0620873	chr6	33257724	PFDN6;WDR46;WDR46	356860	plus	S
cg00106093	45255	3.0139e-10	9.49496e-07	0.0209455	chr6	33391341	SYNGAP1	357481	plus	S
cg05298677	45537	4.1006e-05	0.0359192	0.00521049	chr6	36355542	ETV7	358619	plus	S
cg21553283	45559	1.03915e-05	0.0117474	0.0228119	chr6	36602452		358691	plus	S
cg00199091	45972	4.37735e-05	0.0373604	0.181303	chr6	42228954	TRERF1	359958	plus	S
cg01684562	47079	3.67709e-05	0.0324837	0.0577012	chr6	80713632	TTK;TTK	363204	plus	S
cg25051341	47545	4.23099e-05	0.0368451	0.0249515	chr6	100061307	PRDM13	364645	plus	S
cg27198244	47980	1.01553e-05	0.0115413	0.157025	chr6	112041450	FYN;FYN;FYN	365980	plus	S
cg09235125	49910	2.09139e-05	0.0207421	0.0123555	chr6	158902197	TULP4;TULP4	370873	plus	S
cg16105873	50433	1.48175e-05	0.0154467	0.105637	chr6	167738592	TTLL2;TTLL2	372530	plus	S
cg02683985	50783	4.44121e-05	0.0376987	0.0418234	chr7	559070	PDGFA;PDGFA;PDGFA;PDGFA	374500	plus	S
cg00446065	50984	6.29409e-06	0.00777153	0.0209731	chr7	2154175	MAD1L1;MAD1L1;MAD1L1	376885	plus	S
cg23289794	51014	5.74176e-06	0.00715138	0.215859	chr7	2394357	EIF3B;EIF3B	377100	plus	S
cg01185093	51252	3.39459e-05	0.0305551	0.150113	chr7	5343176	SLC29A4;SLC29A4	378521	plus	S
cg23682824	51845	3.96391e-05	0.0348737	0.0715938	chr7	23144976	KLHL7;KLHL7	380387	plus	S
cg01343991	51859	4.99431e-06	0.00636497	0.00813082	chr7	23338897	C7orf30	380450	plus	S
cg04125062	53086	3.24453e-05	0.0296403	0.0655733	chr7	47306001		384374	plus	S
cg19907438	53333	4.81801e-11	1.77956e-07	0.0437881	chr7	53255225		385001	plus	S
cg09265417	54649	4.17172e-06	0.00541632	0.0377189	chr7	94294798	PEG10;PEG10	388755	plus	S
cg17286985	54708	9.68251e-06	0.0110627	0.0682271	chr7	95945241	SLC25A13;SLC25A13;SLC25A13	388954	plus	S
cg00672712	54942	5.61458e-05	0.0454742	0.0815592	chr7	99752629	C7orf43	390084	plus	S
cg03338527	56397	8.50329e-09	1.92765e-05	0.0595987	chr7	133352892	EXOC4	394531	plus	S
cg22037518	56909	2.65317e-05	0.0251496	0.0602964	chr7	142491168		395859	plus	S
cg16807089	56967	5.00929e-07	0.000819177	0.252942	chr7	143582499	FAM115A	396102	plus	S
cg05374428	57413	2.20152e-09	6.00796e-06	0.0671704	chr7	154735824	LOC100132707;LOC100132707;PAXIP1	398010	plus	S
cg13538299	57646	4.84021e-05	0.040504	0.112123	chr7	157466994	PTPRN2;PTPRN2;PTPRN2	399433	plus	S
cg16841189	58017	1.63525e-05	0.0166816	0.0118846	chr8	1799411	ARHGEF10	401839	plus	S
cg16294168	58018	1.80031e-05	0.0181494	0.0637328	chr8	1810433	ARHGEF10	401850	plus	S
cg08283882	59128	1.98222e-06	0.00278454	0.0122776	chr8	25901017	EBF2	405336	plus	S
cg10605767	59300	1.53824e-05	0.015845	0.11425	chr8	28621703		405927	plus	S
cg07588263	59931	1.4707e-06	0.00212881	0.0270667	chr8	42396768	C8orf40;C8orf40;C8orf40;SLC20A2;C8orf40;C8orf40;C8orf40	407688	plus	S
cg13477525	62531	1.5043e-05	0.0155681	0.048779	chr8	124658143	KLHL38	414712	plus	S
cg06867822	63309	1.49032e-05	0.0154608	0.00955287	chr8	142030569		416427	plus	S
cg08515072	63553	1.64227e-10	5.49715e-07	0.0151357	chr8	144387935		417778	plus	S
cg13211287	63595	6.26057e-05	0.0489444	0.0567528	chr8	144700128	TSTA3	418173	plus	S
cg22846516	63674	3.23741e-13	1.8251e-09	0.0101672	chr8	145661527	NFKBIL2	419062	plus	S
cg13655566	64505	1.4355e-05	0.0150746	0.099802	chr9	78536245	PCSK5	421582	plus	S
cg14349231	65184	2.9215e-05	0.0273303	0.0467082	chr9	103340474	MURC	423235	plus	S
cg14598387	65686	5.45599e-05	0.0444418	0.207574	chr9	125289357	OR1N1	424410	plus	S
cg10363202	66115	4.91309e-05	0.0409539	0.0553074	chr9	132636787	USP20;USP20;USP20	425727	plus	S
cg21243021	66311	1.15666e-07	0.000209103	0.0620548	chr9	135513120	DDX31	426250	plus	S
cg14237458	66650	2.55701e-07	0.000436478	0.0686802	chr9	139047532		427240	plus	S
cg13928909	66840	2.07074e-05	0.020585	0.0624431	chr9	140487898		428324	plus	S
cg14115200	66861	1.49958e-10	5.07967e-07	0.0222913	chr9	140730806		428402	plus	S

## Sheet: BWS16_hyper
row.names	regionID	Pvalue_M	AdjustedPvalue_M	Betadif	chr	pos	Genename	Index	direction	significance
cg15588177	48	1.38572e-06	0.00189082	0.0137438	chr1	1322654	CCNL2;CCNL2;CCNL2;CCNL2	954	plus	S
cg20700460	576	6.86149e-09	1.4923e-05	0.120384	chr1	7130299	CAMTA1	5148	plus	S
cg20163085	928	9.36296e-10	2.29235e-06	0.0118537	chr1	10510396	CORT;APITD1	6284	plus	S
cg19552482	3537	9.45216e-06	0.010916	0.219298	chr1	43312486	ZNF691	15915	plus	S
cg01728866	3565	7.83781e-06	0.00917527	0.00394575	chr1	43638014	WDR65;WDR65;EBNA1BP2;EBNA1BP2;WDR65;WDR65;WDR65;WDR65;WDR65	16026	plus	S
cg13986884	4863	1.80515e-05	0.01968	0.0934294	chr1	67504848	SLC35D1	20191	plus	S
cg17486075	5107	7.42687e-06	0.00881463	0.0731176	chr1	77788391	AK5;AK5	20893	plus	S
cg17966560	7387	1.63983e-05	0.0180152	0.131578	chr1	156357871		29136	plus	S
cg21220147	10871	0	0	0.603986	chr1	229694657	ABCB10	39875	plus	S
cg13977623	11688	7.70426e-06	0.00909347	0.0985501	chr1	246167443	SMYD3;SMYD3	42044	plus	S
cg10631515	69205	3.61042e-05	0.0361426	0.0893525	chr10	52167630	SGMS1	49876	plus	S
cg27041381	73105	2.34615e-05	0.0248817	0.0375819	chr10	131357203	MGMT	61698	plus	S
cg13253210	73184	3.84394e-07	0.000581962	0.0108973	chr10	132365700		62161	plus	S
cg17247873	73352	1.68893e-05	0.0185072	0.279556	chr10	134332277		63103	plus	S
cg02250553	73381	4.73259e-10	1.25944e-06	0.0103058	chr10	134511404	INPP5A	63289	plus	S
cg06962326	73403	2.20848e-07	0.000350457	0.0118635	chr10	134758255		63776	plus	S
cg23987897	73406	2.00355e-07	0.000325163	0.306693	chr10	134775949		63797	plus	S
cg17693826	73406	0	0	0.220148	chr10	134776050		63798	plus	S
cg17247026	73447	6.7356e-07	0.000978271	0.00796932	chr10	135153937		64522	plus	S
cg01714160	73538	1.54085e-09	3.66769e-06	0.00969823	chr11	617467	IRF7;MUPCDH;IRF7;MUPCDH	65353	plus	S
cg13308525	73680	7.65493e-09	1.64814e-05	0.0112393	chr11	1785414	HCCA2;CTSD	66648	plus	S
cg04726730	73689	2.83009e-11	9.25624e-08	0.0233123	chr11	1868700		66728	plus	S
cg11414415	76072	4.27782e-09	9.54612e-06	0.0197085	chr11	57069640	TNKS1BP1	75087	plus	S
cg27139424	76179	2.74696e-05	0.028488	0.246498	chr11	58695093		75532	plus	S
cg21986781	76598	1.91765e-09	4.44122e-06	0.00788215	chr11	64029923	PLCB3	77532	plus	S
cg26445041	77569	1.77751e-10	4.97766e-07	0.0131482	chr11	73472469	RAB6A;RAB6A	82526	plus	S
cg03917623	77569	2.1282e-07	0.000339243	0.0112869	chr11	73472500	RAB6A;RAB6A	82527	plus	S
cg20865656	79412	1.05096e-06	0.00147153	0.014129	chr11	118773752	BCL9L	87692	plus	S
cg20528350	80250	4.43783e-05	0.0439124	0.0176182	chr11	129912579		90186	plus	S
cg15873123	81212	1.24921e-05	0.0141222	0.0751039	chr12	7864058	DPPA3	93517	plus	S
cg02150335	82899	8.1108e-07	0.00116225	0.119622	chr12	51828070	SLC4A8;SLC4A8	98472	plus	S
cg10447644	83589	7.76055e-07	0.00111954	0.010419	chr12	63397289		101856	plus	S
cg21188017	85552	4.12036e-08	7.74293e-05	0.00716014	chr12	112601898	C12orf51	107049	plus	S
cg13903917	86383	4.10385e-06	0.00511138	0.0066	chr12	124904514	NCOR2;NCOR2	110338	plus	S
cg13224075	87616	5.78302e-07	0.000857358	0.0158655	chr13	30107081	SLC7A1	115472	plus	S
cg11462099	90301	4.73098e-07	0.000708716	0.361925	chr13	113540512	ATP11A;ATP11A	123218	plus	S
cg26666292	90301	1.58936e-06	0.00212803	0.383588	chr13	113540557	ATP11A;ATP11A	123219	plus	S
cg11520003	90301	5.33676e-08	9.68882e-05	0.307892	chr13	113540631	ATP11A;ATP11A	123220	plus	S
cg26081974	90370	9.53637e-12	3.3491e-08	0.0117222	chr13	114065897		123823	plus	S
cg14294158	93384	1.5578e-05	0.017158	0.058372	chr14	92508984		133579	plus	S
cg24001985	96368	2.25103e-06	0.00297675	0.0485743	chr15	61434991	RORA	144093	plus	S
cg12006733	98277	2.41431e-09	5.53167e-06	0.00578161	chr15	90177014	KIF7	149739	plus	S
cg19674091	98320	2.0183e-06	0.00268557	0.115062	chr15	90643766	IDH2	149909	plus	S
cg21245492	98700	3.12902e-05	0.0318443	0.0464729	chr15	99250440	IGF1R	151148	plus	S
cg08587397	99028	1.05927e-07	0.000180817	0.0145657	chr16	672930	RAB40C	152527	plus	S
cg16652790	99037	1.64585e-10	4.6393e-07	0.0284636	chr16	776895	HAGHL;HAGHL;CCDC78	152782	plus	S
cg16489931	99051	1.05827e-05	0.0120591	0.018094	chr16	889276		152975	plus	S
cg16548265	100744	1.10881e-06	0.00154246	0.0638589	chr16	30435302	DCTPP1	160352	plus	S
cg06803257	101941	5.68833e-07	0.000846248	0.0454501	chr16	67999044	SLC12A4;SLC12A4;SLC12A4;SLC12A4;SLC12A4	164706	plus	S
cg02525666	102214	8.7804e-07	0.001254	0.0299595	chr16	71845903		165664	plus	S
cg08278290	103279	1.46221e-06	0.00198257	0.0755115	chr16	88016208	BANP;BANP	169375	plus	S
cg07206676	104185	3.03493e-05	0.0311084	0.0635761	chr17	6456371	PITPNM3;PITPNM3	174441	plus	S
cg11771402	105383	1.9025e-05	0.0206364	0.0159825	chr17	27621314	NUFIP2	179378	plus	S
cg20286236	105511	4.70336e-05	0.0464326	0.168337	chr17	29886672	MIR193A	179801	plus	S
cg04643858	108225	3.98757e-06	0.0049956	0.00493445	chr17	72278043	DNAI2	190182	plus	S
cg19476918	108740	2.45623e-08	4.78282e-05	0.0523759	chr17	76574137	DNAH17	192562	plus	S
cg09680719	108862	2.36428e-06	0.00310733	0.0463632	chr17	77796831		193228	plus	S
cg08906153	108893	7.92699e-13	3.5014e-09	0.00961808	chr17	78061579	CCDC40	193486	plus	S
cg19431009	108928	9.91554e-08	0.000170617	0.0241821	chr17	78339332	RNF213;LOC100294362	193709	plus	S
cg22147539	109117	1.58436e-06	0.00212798	0.0177436	chr17	79869413	PCYT2	195375	plus	S
cg20592144	109143	7.39485e-09	1.60018e-05	0.00947083	chr17	80049216	FASN	195696	plus	S
cg02692511	109224	3.9968e-15	2.85408e-11	0.17381	chr17	80605670	WDR45L	196267	plus	S
cg15864104	110079	7.42229e-07	0.00107436	0.0154358	chr18	55254508	FECH;FECH	200451	plus	S
cg22069258	110682	1.45924e-08	3.03505e-05	0.0560982	chr19	1360039	MUM1;MUM1	203619	plus	S
cg21206277	111030	1.97419e-09	4.54759e-06	0.0166578	chr19	4048075	ZBTB7A	205930	plus	S
cg18058596	111193	5.64458e-09	1.2339e-05	0.0110735	chr19	5694383	LONP1	206823	plus	S
cg12754417	111592	8.6504e-09	1.84393e-05	0.14125	chr19	10680035	CDKN2D;CDKN2D	208953	plus	S
cg24354730	111611	1.33693e-06	0.00183595	0.0389921	chr19	10815588	QTRT1	209050	plus	S
cg22208365	114282	1.02141e-14	6.6307e-11	0.273445	chr19	53898269	ZNF765	222946	plus	S
cg08100159	12437	8.06997e-07	0.00116028	0.0324161	chr2	9560753	ITGB1BP1;ITGB1BP1	227735	plus	S
cg26782151	14044	2.63436e-05	0.0276643	0.0725645	chr2	42991878	OXER1	232262	plus	S
cg10848522	15668	6.49315e-07	0.000946266	0.00784765	chr2	75937996	C2orf3;C2orf3	237129	plus	S
cg13226232	17460	5.43032e-12	1.98859e-08	0.0102316	chr2	128158601		242377	plus	S
cg10279535	17560	5.38058e-12	1.98736e-08	0.00860081	chr2	129250911		242731	plus	S
cg04654132	19713	2.12641e-08	4.2975e-05	0.043162	chr2	191881917		248346	plus	S
cg26685735	21230	0	0	0.23791	chr2	228028776	COL4A3;COL4A4;COL4A3;COL4A4;COL4A3;COL4A3	252627	plus	S
cg17134302	21303	4.80093e-06	0.0059279	0.0384454	chr2	230821547	FBXO36	252829	plus	S
cg25976672	21644	3.18812e-12	1.24179e-08	0.00965555	chr2	235907796	SH3BP4	254000	plus	S
cg13524563	21686	7.77882e-06	0.00913116	0.0211926	chr2	236471576	AGAP1;AGAP1	254121	plus	S
cg03244587	22298	2.82979e-07	0.000433014	0.0643968	chr2	242663548	ING5	256752	plus	S
cg13326227	115267	7.04565e-06	0.00843225	0.011532	chr20	20349168	INSM1	259420	plus	S
cg23825981	116457	1.51256e-05	0.0167892	0.0174649	chr20	60982038	CABLES2	265394	plus	S
cg02697781	117237	7.28573e-11	2.22972e-07	0.0131323	chr21	44492131	CBS	269114	plus	S
cg02959939	117517	1.19004e-06	0.00165009	0.0198631	chr21	47813025	PCNT	270466	plus	S
cg11536673	117714	3.09362e-05	0.031559	0.00967544	chr22	20130698	ZDHHC8	271411	plus	S
cg05684501	118380	2.73117e-07	0.00042093	0.0441603	chr22	37415824	MPST;MPST;TST;MPST;MPST;MPST	274129	plus	S
cg01143938	119010	2.43584e-05	0.0257056	0.156097	chr22	48606263		277170	plus	S
cg20899354	23361	4.92939e-14	2.77898e-10	0.0423661	chr3	25469392	RARB;RARB	281126	plus	S
cg26124016	23361	4.61364e-12	1.73398e-08	0.0560127	chr3	25469402	RARB;RARB	281127	plus	S
cg18094781	23361	1.2743e-06	0.00175556	0.0770899	chr3	25469430	RARB;RARB	281128	plus	S
cg13680844	24710	4.82443e-05	0.047282	0.00760652	chr3	52255405	TLR9	286031	plus	S
cg24163658	25042	1.85733e-09	4.32491e-06	0.223436	chr3	58182370	DNASE1L3	287110	plus	S
cg17805210	25623	2.81208e-05	0.0289627	0.0851863	chr3	71216678	FOXP1	288327	plus	S
cg07857225	27478	4.99921e-09	1.10409e-05	0.0104649	chr3	129275971	PLXND1	293096	plus	S
cg26856316	28441	4.8556e-05	0.047282	0.0477678	chr3	154146704	GPR149	295974	plus	S
cg05131623	29238	3.1133e-06	0.00400574	0.187354	chr3	179755285	PEX5L	297969	plus	S
cg07277038	30179	1.41269e-05	0.0158035	0.344043	chr3	196373543	LRRC33	300855	plus	S
cg20534585	30179	9.86869e-06	0.0113056	0.369684	chr3	196373598	LRRC33	300856	plus	S
cg19182279	30349	1.46083e-09	3.5163e-06	0.014123	chr4	892011	GAK	301816	plus	S
cg13558774	30380	2.46649e-06	0.00322189	0.0875927	chr4	1196025	LOC100130872;LOC100130872-SPON2	302198	plus	S
cg12201155	30389	1.95628e-11	6.59982e-08	0.014958	chr4	1290568	MAEA;MAEA	302355	plus	S
cg13382000	32594	1.37958e-05	0.015555	0.00412782	chr4	71553885	UTP3	309861	plus	S
cg13745593	34393	3.46539e-06	0.00439279	0.0234817	chr4	135248186		314736	plus	S
cg07963355	34890	1.0015e-07	0.000171639	0.0505195	chr4	152025000	RPS3A;SNORD73A	315984	plus	S
cg15640243	35541	3.34352e-05	0.0337866	0.057485	chr4	176920601	GPM6A;GPM6A	317847	plus	S
cg07296995	36398	1.96716e-06	0.00262566	0.335281	chr5	2129767		321577	plus	S
cg14725924	36606	8.08848e-06	0.00944291	0.054912	chr5	6411956		322327	plus	S
cg03127656	37449	2.57515e-08	4.94769e-05	0.0592604	chr5	36303314	RANBP3L;RANBP3L	324238	plus	S
cg19805179	37563	2.39146e-05	0.0252995	0.0824403	chr5	39422423	DAB2	324576	plus	S
cg14099514	37618	2.9884e-05	0.030705	0.0802597	chr5	41510519	PLCXD3	324721	plus	S
cg21168101	37839	2.10511e-07	0.000337807	0.0778903	chr5	53752133	HSPB3;HSPB3	325465	plus	S
cg27343660	39897	1.89486e-08	3.90319e-05	0.0705148	chr5	116289441		330857	plus	S
cg26207908	41257	0	0	0.572025	chr5	145582897	RBM27	335475	plus	S
cg20272015	43019	1.4614e-06	0.00198257	0.0970254	chr5	179517626		341045	plus	S
cg14543412	44664	9.33862e-06	0.010814	0.0374134	chr6	26224100	HIST1H3E	345954	plus	S
cg27464755	44702	4.39368e-07	0.00066285	0.0384976	chr6	26537980	HMGN4	346141	plus	S
cg12319423	44881	3.4116e-05	0.0343126	0.0542458	chr6	28555539	SCAND3	347166	plus	S
cg21753200	44919	1.94873e-05	0.0210314	0.0154833	chr6	28864643		347517	plus	S
cg01217601	45051	3.3016e-05	0.0334418	0.0474644	chr6	30686747	TUBB;MDC1	350546	plus	S
cg15480114	45152	3.34585e-09	7.50547e-06	0.00985707	chr6	31857040	EHMT2;EHMT2	353292	plus	S
cg09774179	45567	2.3493e-07	0.000370062	0.00996352	chr6	36652043	CDKN1A;CDKN1A	358737	plus	S
cg22847579	45967	1.57875e-07	0.000259166	0.02187	chr6	42185566	MRPS10	359942	plus	S
cg09094393	49260	4.28336e-05	0.0424822	0.0550356	chr6	146136749	FBXO30	369196	plus	S
cg22853813	49810	1.49913e-05	0.0166834	0.0998164	chr6	157743451	C6orf35	370608	plus	S
cg10584587	50162	5.28267e-10	1.39715e-06	0.00941188	chr6	163730283	PACRG;PACRG;PACRG	371640	plus	S
cg22940273	50836	2.52936e-05	0.026627	0.0100439	chr7	978275	ADAP1	375089	plus	S
cg20007465	50843	2.18043e-08	4.38599e-05	0.0412989	chr7	1068125	C7orf50;C7orf50;C7orf50	375284	plus	S
cg25594100	51213	9.79525e-06	0.0112515	0.0141347	chr7	4786943	FOXK1	378167	plus	S
cg14783646	51214	2.75269e-05	0.028488	0.0124	chr7	4800873	FOXK1	378190	plus	S
cg20370909	51217	4.09822e-10	1.09744e-06	0.227812	chr7	4859229	RADIL	378305	plus	S
cg03004999	52849	2.64435e-05	0.0277014	0.0578275	chr7	43152125	HECW1	383551	plus	S
cg12248186	53891	3.36119e-06	0.00427334	0.0631367	chr7	73112226	WBSCR22	386533	plus	S
cg13627256	54883	4.2114e-06	0.00523014	0.0123512	chr7	99214534	ZNF498	389843	plus	S
cg27082426	56782	1.14456e-07	0.0001946	0.11502	chr7	139995984		395503	plus	S
cg15079124	56929	8.37863e-06	0.00975507	0.0640584	chr7	142829213	PIP	395959	plus	S
cg14323456	57288	2.27607e-05	0.0243191	0.0725214	chr7	151205434	RHEB	397549	plus	S
cg15230900	57670	4.30355e-09	9.55376e-06	0.152553	chr7	157643125	PTPRN2;PTPRN2;PTPRN2	399700	plus	S
cg21453840	57936	2.28215e-06	0.00300861	0.0240165	chr8	1101471		401200	plus	S
cg26832427	58016	1.54801e-08	3.20413e-05	0.0154037	chr8	1792213	ARHGEF10	401829	plus	S
cg18929511	58688	4.94387e-06	0.00608686	0.353344	chr8	17942993	ASAH1;ASAH1;ASAH1	403940	plus	S
cg03430526	59259	5.95979e-08	0.00010729	0.0370893	chr8	27942055	C8orf80	405790	plus	S
cg16190018	59432	0	0	0.559968	chr8	30585628	GSR	406255	plus	S
cg11183445	60616	4.80591e-05	0.047282	0.0429932	chr8	66545802	ARMC1	409711	plus	S
cg04326353	60771	2.13393e-05	0.0229146	0.124102	chr8	70539979	SULF1;SULF1;SULF1;SULF1	410173	plus	S
cg06727855	61724	6.72017e-06	0.00808789	0.0132087	chr8	100905878	COX6C;COX6C	412705	plus	S
cg12859054	62998	2.10069e-06	0.00278653	0.0351696	chr8	133958686	TG	415613	plus	S
cg21643262	63587	4.02796e-06	0.00503149	0.074451	chr8	144646939		418076	plus	S
cg14234176	63617	2.99455e-06	0.00386454	0.0569869	chr8	144887661	SCRIB;SCRIB	418368	plus	S

## Sheet: BWS17_hyper
row.names	regionID	Pvalue_M	AdjustedPvalue_M	Betadif	chr	pos	Genename	Index	direction	significance
cg00386984	156	3.9968e-15	2.01465e-11	0.0124375	chr1	2249617		2054	plus	S
cg12072178	649	3.16997e-05	0.0276056	0.162555	chr1	7830855	VAMP3	5315	plus	S
cg24140574	1415	1.01574e-06	0.0012578	0.0138763	chr1	16342155	HSPB7	7935	plus	S
cg14965477	1724	1.44981e-05	0.0140221	0.00597695	chr1	19536541	UBR4	8918	plus	S
cg21499909	1850	5.43281e-05	0.0438366	0.0271192	chr1	20960545	PINK1	9385	plus	S
cg04234465	2537	1.06981e-12	3.60919e-09	0.154097	chr1	28974730	RNU11	12216	plus	S
cg11916186	3047	4.82281e-13	1.75115e-09	0.0857453	chr1	36689760	THRAP3	14118	plus	S
cg19695415	3063	6.30925e-06	0.00665822	0.00498525	chr1	36859592	LSM10	14197	plus	S
cg15644675	4196	9.59294e-07	0.0012018	0.00859463	chr1	54666143	CYB5RL;MRPL37	18572	plus	S
cg26342890	4805	3.433e-06	0.0038606	0.0709705	chr1	65988782	LEPR;LEPR;LEPR	20052	plus	S
cg05949203	4923	4.58766e-12	1.38423e-08	0.202026	chr1	68516279	DIRAS3;DIRAS3	20352	plus	S
cg13942103	6211	6.14589e-05	0.0485838	0.0897282	chr1	111177829		24182	plus	S
cg07239004	6556	1.40572e-08	2.48881e-05	0.0584049	chr1	117449463		25339	plus	S
cg03969696	6914	1.78876e-10	4.21102e-07	0.483459	chr1	150229580	CA14	26568	plus	S
cg17859048	6990	0	0	0.420789	chr1	151170906	PIP5K1A;PIP5K1A;PIP5K1A;PIP5K1A	26994	plus	S
cg21817668	9066	9.22259e-09	1.68148e-05	0.0990441	chr1	197870871	C1orf53	34081	plus	S
cg00475456	9787	2.42534e-05	0.0218309	0.0419658	chr1	208131213		36493	plus	S
cg15876513	67003	4.90719e-14	2.12375e-10	0.00769452	chr10	1149726	WDR37	43353	plus	S
cg23371707	67340	0	0	0.474525	chr10	5726631	C10orf18	44557	plus	S
cg15843567	68200	0	0	0.407682	chr10	26223206	MYO3A;MYO3A	47125	plus	S
cg18565783	69318	2.95648e-10	6.5975e-07	0.160427	chr10	57390704		50110	plus	S
cg02790122	69579	9.30763e-06	0.00938331	0.0669019	chr10	65133532	JMJD1C;MIR1296	50730	plus	S
cg26546862	69702	4.78811e-06	0.00524679	0.0697843	chr10	70288128	SLC25A16	51021	plus	S
cg04550626	70024	1.25784e-05	0.0122763	0.163088	chr10	74118550		52045	plus	S
cg00312508	70643	5.12337e-05	0.0417327	0.0898504	chr10	85322997		53528	plus	S
cg19235339	70857	0	0	0.420521	chr10	90342899	RNLS;RNLS	54130	plus	S
cg04801704	71268	3.37107e-09	6.41936e-06	0.100329	chr10	98145598	TLL2	55358	plus	S
cg18861311	71575	3.02904e-06	0.00347008	0.0162376	chr10	102747418	C10orf2;C10orf2;C10orf2;MRPL43;MRPL43;MRPL43;C10orf2;MRPL43;C10orf2;C10orf2	56637	plus	S
cg00088504	72433	8.25548e-08	0.000127694	0.0386702	chr10	120765398		59603	plus	S
cg13171643	73099	2.23021e-05	0.0203308	0.0480617	chr10	131324189	MGMT	61667	plus	S
cg23636072	73612	5.31354e-06	0.00573455	0.0127473	chr11	1216443		66040	plus	S
cg03784994	73652	1.15078e-05	0.0113347	0.00828206	chr11	1556050	HCCA2	66491	plus	S
cg24098643	73990	1.50527e-05	0.0144606	0.0245185	chr11	5706435	TRIM5;TRIM5;TRIM5	68760	plus	S
cg06306203	74036	2.0244e-07	0.000297044	0.0752716	chr11	6444626		68936	plus	S
cg10703481	74048	1.72787e-06	0.0020854	0.00875228	chr11	6518792	DNHD1;DNHD1	68998	plus	S
cg17073076	74137	8.94847e-06	0.00904251	0.0647626	chr11	8036796		69312	plus	S
cg26453360	75840	6.35861e-09	1.18452e-05	0.0113584	chr11	46741373	F2	74426	plus	S
cg23508264	76453	7.68718e-13	2.65615e-09	0.0106562	chr11	62415024	GANAB;GANAB;INTS5	76680	plus	S
cg24359671	76598	7.84401e-10	1.65557e-06	0.00633803	chr11	64030212	PLCB3	77534	plus	S
cg05743713	76948	3.05682e-10	6.76243e-07	0.233624	chr11	66885240	KDM2A;KDM2A	79805	plus	S
cg12598767	77481	5.76197e-05	0.0458024	0.00607205	chr11	72465959	STARD10	82260	plus	S
cg08238677	79970	3.53839e-05	0.0302001	0.0180731	chr11	125753051	HYLS1	89422	plus	S
cg21507854	80633	1.92852e-05	0.0177696	0.0940873	chr12	506697	CCDC77;CCDC77	91311	plus	S
cg09369651	81429	1.36328e-05	0.0132451	0.0582591	chr12	11841125	ETV6	94093	plus	S
cg22999327	81789	7.63584e-07	0.000979527	0.104938	chr12	20700997	PDE3A	94978	plus	S
cg19610177	81807	2.06378e-07	0.000301788	0.0575894	chr12	21531187	SLCO1A2;IAPP	95006	plus	S
cg06077899	82255	4.41824e-12	1.35216e-08	0.290784	chr12	32832894	DNM1L;DNM1L;DNM1L	96161	plus	S
cg06938101	82377	9.41302e-08	0.000145074	0.219028	chr12	42632312	YAF2	96585	plus	S
cg24026388	82589	2.00604e-08	3.46572e-05	0.0732804	chr12	48099519	RPAP3;RPAP3;RPAP3	97119	plus	S
cg26663063	82684	2.01084e-12	6.52693e-09	0.0142358	chr12	49239477	DDX23	97497	plus	S
cg07281948	83395	1.57159e-05	0.0150639	0.00439271	chr12	57601935	LRP1	101049	plus	S
cg24979630	84237	0	0	0.413571	chr12	80329299	PPP1R12A;PPP1R12A	103344	plus	S
cg13237265	84445	5.87533e-07	0.000781776	0.0651173	chr12	91539916	DCN;DCN;DCN;DCN;DCN;DCN	103861	plus	S
cg14282207	84750	2.64175e-05	0.0235317	0.0984036	chr12	97313586	NEDD1;NEDD1;NEDD1;NEDD1	104582	plus	S
cg11847805	85251	2.16745e-07	0.000314022	0.0894814	chr12	108916474	SART3	105993	plus	S
cg05693740	85428	7.32747e-15	3.52753e-11	0.196602	chr12	110841898	ANAPC7;ANAPC7	106586	plus	S
cg18906324	85889	1.27519e-10	3.12207e-07	0.0161	chr12	118199026	KSR2	108279	plus	S
cg02410480	86912	1.86756e-05	0.0173572	0.226185	chr12	132819930	GALNT9	112503	plus	S
cg04131456	87015	3.71046e-07	0.000517839	0.00978505	chr13	19755916	TUBA3C;TUBA3C	113577	plus	S
cg07583851	88179	1.97667e-07	0.000291037	0.0828114	chr13	42840965		116906	plus	S
cg27023962	88603	2.79161e-09	5.38777e-06	0.0670936	chr13	50909275		118091	plus	S
cg16040900	92924	3.14503e-05	0.0275002	0.0296381	chr14	78265599	ADCK1;ADCK1	132431	plus	S
cg16766249	92969	0	0	0.77931	chr14	79745154	NRXN3;NRXN3;NRXN3	132506	plus	S
cg23376870	93251	4.81749e-05	0.0394662	0.246111	chr14	90422459	TDP1;C14orf143;TDP1	133155	plus	S
cg03548062	93965	2.03015e-06	0.00240651	0.0124216	chr14	101158251		135342	plus	S
cg00685291	94276	0	0	0.422511	chr14	104551884	ASPG	136977	plus	S
cg09281891	94480	4.35156e-06	0.00480529	0.0101322	chr14	106064508		138184	plus	S
cg02753990	95212	2.42774e-08	4.09519e-05	0.0613932	chr15	38541740		140510	plus	S
cg22549853	95826	7.9458e-08	0.000123797	0.0793413	chr15	49440021	COPS2;COPS2	142660	plus	S
cg25063425	96111	2.60425e-05	0.0232945	0.0656382	chr15	57138252		143495	plus	S
cg04446470	98904	7.85889e-06	0.00805547	0.23203	chr15	101817902	SELS;SELS	151808	plus	S
cg16628135	99099	9.07263e-11	2.26001e-07	0.0076309	chr16	1397791	BAIAP3	153795	plus	S
cg00390337	99142	6.78038e-07	0.0008857	0.00619857	chr16	1798633	MAPK8IP3;MAPK8IP3	154374	plus	S
cg26688936	99178	7.28204e-06	0.00753631	0.0042828	chr16	2131718	TSC2;TSC2;TSC2	154832	plus	S
cg00030682	100073	9.66715e-07	0.00120757	0.0613373	chr16	16175602	ABCC1;ABCC1;ABCC1;ABCC1;ABCC1	158167	plus	S
cg03772408	100151	4.27732e-06	0.00473551	0.035149	chr16	19083353	COQ7	158312	plus	S
cg06364293	100531	2.19843e-06	0.00258772	0.0849165	chr16	27270361	NSMCE1	159376	plus	S
cg07364009	101044	5.02918e-05	0.0410434	0.0618362	chr16	48381505	LONP2	161637	plus	S
cg08895936	101458	4.94697e-06	0.00539328	0.105781	chr16	56761075		162933	plus	S
cg05225549	103108	3.32508e-06	0.00374907	0.0969435	chr16	86588418	MTHFSD;MTHFSD;MTHFSD;MTHFSD;MTHFSD;MTHFSD;MTHFSD;FLJ30679	168572	plus	S
cg06093811	103108	1.4917e-07	0.000222692	0.149377	chr16	86588436	MTHFSD;MTHFSD;MTHFSD;MTHFSD;MTHFSD;MTHFSD;MTHFSD;FLJ30679	168573	plus	S
cg08086906	103108	0	0	0.16635	chr16	86588932	MTHFSD;MTHFSD;MTHFSD;MTHFSD;MTHFSD;MTHFSD;MTHFSD;FLJ30679	168575	plus	S
cg04531202	103108	7.95654e-06	0.00813611	0.020392	chr16	86588934	MTHFSD;MTHFSD;MTHFSD;MTHFSD;MTHFSD;MTHFSD;MTHFSD;FLJ30679	168576	plus	S
cg06874952	103108	1.47442e-08	2.59969e-05	0.0162766	chr16	86588968	MTHFSD;MTHFSD;MTHFSD;MTHFSD;MTHFSD;MTHFSD;MTHFSD;FLJ30679	168578	plus	S
cg10756578	103108	3.03404e-08	5.03857e-05	0.0593936	chr16	86589063	MTHFSD;MTHFSD;MTHFSD;MTHFSD;MTHFSD;MTHFSD;MTHFSD;FLJ30679	168581	plus	S
cg06599274	103108	2.16668e-06	0.00255738	0.0687515	chr16	86589076	MTHFSD;MTHFSD;MTHFSD;MTHFSD;MTHFSD;MTHFSD;MTHFSD;FLJ30679	168582	plus	S
cg03228804	103108	3.11054e-05	0.0272542	0.0485751	chr16	86589205	MTHFSD;MTHFSD;MTHFSD;MTHFSD;MTHFSD;MTHFSD;MTHFSD;FLJ30679	168583	plus	S
cg00127861	103149	2.03325e-06	0.00240651	0.0736056	chr16	86951112		168752	plus	S
cg23877242	105342	2.53514e-05	0.0227238	0.0977139	chr17	27233193	PHF12	179218	plus	S
cg25710854	105709	1.35764e-07	0.000205544	0.0631255	chr17	33902444	PEX12	180452	plus	S
cg25355723	106012	1.0466e-05	0.0104772	0.0070028	chr17	37910446		181805	plus	S
cg13187349	106853	4.60471e-05	0.0379933	0.0501318	chr17	46627384	HOXB3	185454	plus	S
cg24070195	106876	1.70892e-10	4.06776e-07	0.0890378	chr17	46969581	ATP5G1;ATP5G1	185873	plus	S
cg26023938	106876	3.28557e-10	7.1458e-07	0.0816415	chr17	46969609	ATP5G1;ATP5G1	185874	plus	S
cg05271336	107903	1.11967e-05	0.0110536	0.0856655	chr17	65908177	BPTF;BPTF	189406	plus	S
cg04591732	109065	2.43132e-06	0.00284621	0.0119227	chr17	79419108	BAHCC1	194881	plus	S
cg11887884	109074	1.33227e-15	7.13523e-12	0.0310044	chr17	79486500		194993	plus	S
cg20731110	109289	5.17919e-07	0.000700018	0.0105706	chr18	580228	CETN1	197001	plus	S
cg07807210	110330	8.56046e-11	2.15752e-07	0.0159007	chr18	74770431	MBP;MBP	201524	plus	S
cg12708841	110383	5.21044e-06	0.00563749	0.0184692	chr18	76463655		201737	plus	S
cg14730616	110525	7.60025e-07	0.00097789	0.0172062	chr18	77866350	ADNP2	202391	plus	S
cg13649087	111009	9.83415e-06	0.00986768	0.0139321	chr19	3871442		205778	plus	S
cg02259934	111087	8.10321e-08	0.000125792	0.0146398	chr19	4566484		206270	plus	S
cg08288795	111250	5.98658e-05	0.047412	0.00480214	chr19	6375402	PSPN	207138	plus	S
cg11595059	111646	3.48882e-05	0.0298961	0.0645872	chr19	11314087	DOCK6	209286	plus	S
cg02415661	112067	7.67281e-06	0.0078836	0.1208	chr19	16308183	AP1M1;AP1M1	211622	plus	S
cg05667138	112180	1.04546e-06	0.00129087	0.0469112	chr19	17732285	UNC13A	212241	plus	S
cg25945090	112633	3.66388e-05	0.0310854	0.0117774	chr19	33463020	C19orf40;CCDC123	214312	plus	S
cg00891608	112633	5.40511e-05	0.0436953	0.257254	chr19	33463040	C19orf40;CCDC123	214314	plus	S
cg23674904	112954	3.71747e-12	1.15418e-08	0.00820745	chr19	38572847	SIPA1L3	216013	plus	S
cg23446375	113023	3.09874e-06	0.00354046	0.013374	chr19	39322544	ECH1	216354	plus	S
cg11702778	113742	2.01608e-10	4.6692e-07	0.0110588	chr19	48185277	GLTSCR1	220154	plus	S
cg17522445	113775	6.21205e-06	0.00657948	0.00809434	chr19	48675153		220298	plus	S
cg25233534	113788	3.91781e-05	0.0328495	0.0387896	chr19	48778979	ZNF114	220336	plus	S
cg16530498	113852	2.86732e-06	0.00329362	0.106827	chr19	49339776	HSD17B14;HSD17B14	220770	plus	S
cg13506058	113954	0	0	0.674977	chr19	50270010	AP2A1;AP2A1	221452	plus	S
cg01086369	114016	2.56684e-13	9.64716e-10	0.0106003	chr19	50885373	NR1H2	221763	plus	S
cg11573093	114051	4.41469e-12	1.35216e-08	0.0177958	chr19	51220202	SHANK1	221964	plus	S
cg00047185	114308	1.64672e-05	0.0156788	0.115186	chr19	54196849	MIR526B	223053	plus	S
cg15604044	114319	3.10175e-07	0.000435726	0.103436	chr19	54259681	MIR516A1	223108	plus	S
cg13084049	114450	4.42942e-05	0.0367082	0.0120602	chr19	55851240	SUV420H2;SUV420H2	223871	plus	S
cg08466982	13087	0	0	0.538743	chr2	24162619	UBXN2A	229463	plus	S
cg15113090	13250	6.03347e-06	0.00643054	0.00782945	chr2	26696104	OTOF;OTOF;OTOF;OTOF	230085	plus	S
cg27427369	14572	4.09158e-05	0.0341728	0.0324964	chr2	54017536	LOC100302652;ERLEC1;ERLEC1;ERLEC1	233594	plus	S
cg24583646	15668	1.00817e-10	2.49685e-07	0.0262542	chr2	75937918	C2orf3	237129	plus	S
cg10848522	15668	9.88379e-09	1.79439e-05	0.0107277	chr2	75937996	C2orf3;C2orf3	237130	plus	S
cg18815025	15900	4.70032e-07	0.000649639	0.0354405	chr2	85980731	ATOH8	237744	plus	S
cg03171300	15931	3.46213e-05	0.029744	0.183335	chr2	86307199	POLR1A	237829	plus	S
cg06529078	15955	1.72998e-05	0.0163624	0.0123787	chr2	86790673	VPS24;VPS24	237947	plus	S
cg10815253	17076	5.42442e-06	0.00583951	0.0789192	chr2	116925524		241201	plus	S
cg06912356	17433	9.91533e-07	0.00123497	0.0129812	chr2	127815206	BIN1;BIN1;BIN1;BIN1;BIN1;BIN1;BIN1;BIN1;BIN1;BIN1	242279	plus	S
cg09143605	17917	7.66652e-07	0.000980527	0.0579633	chr2	137184365		243643	plus	S
cg21012647	20031	2.22045e-16	1.37879e-12	0.437706	chr2	201981814	CFLAR;CFLAR	249219	plus	S
cg14288266	20182	4.44385e-05	0.0367566	0.0825898	chr2	204737672	CTLA4;CTLA4	249655	plus	S
cg09157320	21224	6.26262e-05	0.0493246	0.131379	chr2	227850069	RHBDD1;RHBDD1	252618	plus	S
cg13326227	115266	0	0	0.542978	chr20	20349168	INSM1	259421	plus	S
cg17220042	115523	1.55431e-15	8.22166e-12	0.0371297	chr20	32274205	E2F1;E2F1	260756	plus	S
cg06379722	116174	1.63746e-07	0.000242761	0.0761325	chr20	50804300	ZFP64;ZFP64;ZFP64;ZFP64	263986	plus	S
cg03524836	116825	8.03874e-06	0.00820058	0.11035	chr21	33043626	SFRS15;SFRS15;SFRS15	267353	plus	S
cg25791279	118223	6.33225e-07	0.000834797	0.210754	chr22	32026902	PISD	273535	plus	S
cg22896904	118453	3.06195e-10	6.76243e-07	0.0255757	chr22	38240259	ANKRD54;ANKRD54	274486	plus	S
cg22985736	118997	1.54527e-09	3.12302e-06	0.0292336	chr22	47516278	TBC1D22A	277142	plus	S
cg16266007	23138	1.02831e-07	0.000157916	0.0116248	chr3	16646983	DAZL;DAZL	280641	plus	S
cg14623735	23984	1.38363e-11	3.90015e-08	0.012622	chr3	42265667	TRAK1	282839	plus	S
cg04507495	24387	3.24078e-09	6.22659e-06	0.45648	chr3	47563649		284206	plus	S
cg09665691	24387	5.9042e-07	0.000783185	0.0628333	chr3	47563885		284207	plus	S
cg19508367	24746	2.83679e-05	0.0251124	0.145391	chr3	52591502	PBRM1;PBRM1;PBRM1	286247	plus	S
cg15761531	24753	6.58856e-06	0.0068895	0.096502	chr3	52737578	GLT8D1;GLT8D1;GLT8D1;GLT8D1	286276	plus	S
cg19483126	24904	3.20409e-10	7.00414e-07	0.0108251	chr3	55504238	WNT5A	286690	plus	S
cg11038507	25572	1.1799e-06	0.00145269	0.056098	chr3	69985375	MITF;MITF;MITF;MITF;MITF;MITF	288233	plus	S
cg02135281	26366	8.88372e-07	0.0011195	0.0572378	chr3	107567901	LOC151658;LOC151658	289914	plus	S
cg27279460	26494	2.33045e-05	0.0210653	0.255593	chr3	111697713	ABHD10	290207	plus	S
cg06375534	29379	3.32776e-05	0.028804	0.00369642	chr3	183353366	KLHL24	298385	plus	S
cg18005972	30326	1.42109e-14	6.61818e-11	0.00600483	chr4	716883	PCGF3	301548	plus	S
cg20792107	30382	0	0	0.431078	chr4	1243087	C4orf42;CTBP1;CTBP1	302318	plus	S
cg07265976	30526	2.40588e-07	0.000343605	0.0143219	chr4	2696715	FAM193A	303363	plus	S
cg01530024	30755	3.11868e-08	5.15915e-05	0.0177645	chr4	5458553	STK32B	304503	plus	S
cg22161147	30965	2.61342e-06	0.00301004	0.0428789	chr4	7777798	AFAP1;AFAP1;LOC84740	305354	plus	S
cg21097698	32784	1.85002e-09	3.66968e-06	0.00656142	chr4	76932399	ART3;ART3	310401	plus	S
cg11079181	34137	3.16635e-05	0.0276056	0.0520446	chr4	122855067	TRPC3;TRPC3	314139	plus	S
cg03304437	35161	1.21412e-05	0.0119312	0.0603634	chr4	159092536	FAM198B;FAM198B;FAM198B	316742	plus	S
cg14090208	36341	4.50747e-07	0.000625001	0.103537	chr5	1632226	LOC728613	321136	plus	S
cg11332400	36880	3.19757e-06	0.003634	0.0935171	chr5	14052367		322967	plus	S
cg15128898	37418	9.42351e-06	0.00947784	0.0219134	chr5	35618029	SPEF2;SPEF2;SPEF2;SPEF2	324143	plus	S
cg21549695	38622	2.07618e-09	4.06187e-06	0.0581466	chr5	74333288		327482	plus	S
cg26207908	41257	3.10862e-15	1.58561e-11	0.457363	chr5	145582897	RBM27	335476	plus	S
cg14068146	42770	4.03818e-06	0.00449398	0.00807289	chr5	176940708	DDX41	340070	plus	S
cg00594128	42899	3.77102e-05	0.0319311	0.337394	chr5	178450882	ZNF879;ZNF879	340560	plus	S
cg20272015	43019	6.50088e-06	0.00682682	0.0836396	chr5	179517626		341046	plus	S
cg03198741	43204	3.86246e-05	0.0325127	0.0201478	chr6	1003969	LOC285768;LOC285768	341856	plus	S
cg06154005	44076	2.94533e-07	0.000416484	0.0762879	chr6	14842813		344436	plus	S
cg27087525	44250	1.11753e-05	0.0110536	0.0364483	chr6	17600386	FAM8A1	344837	plus	S
cg01400476	44308	1.23531e-09	2.55689e-06	0.0954365	chr6	18387809	RNF144B;RNF144B	344974	plus	S
cg26529239	44881	5.37395e-07	0.000724056	0.0833197	chr6	28550343	SCAND3	347127	plus	S
cg09758975	45014	5.44866e-07	0.000731822	0.00500453	chr6	30166532	TRIM26	349402	plus	S
cg04013595	45030	6.66134e-15	3.24328e-11	0.236862	chr6	30484429		349921	plus	S
cg04983519	45152	6.27646e-05	0.0493428	0.080191	chr6	31853647	EHMT2;EHMT2	353235	plus	S
cg17001689	45168	0	0	0.405558	chr6	32055525	TNXB	353960	plus	S
cg01108614	45171	6.59411e-07	0.000864002	0.00634363	chr6	32166763	NOTCH4	354706	plus	S
cg00106093	45255	4.72828e-11	1.2204e-07	0.0219318	chr6	33391341	SYNGAP1	357484	plus	S
cg05233674	45364	7.03758e-06	0.00730095	0.0756435	chr6	34433773	PACSIN1	358075	plus	S
cg00106211	45549	6.98118e-06	0.00726002	0.0164558	chr6	36514552	STK38	358662	plus	S
cg11768148	46681	2.61776e-05	0.0233666	0.0818926	chr6	56910312	KIAA1586	362120	plus	S
cg09342766	46867	3.534e-05	0.0302001	0.0486479	chr6	72596291	RIMS1	362596	plus	S
cg15336269	47706	3.37089e-09	6.41936e-06	0.128235	chr6	106809237		365128	plus	S
cg15145908	48840	1.22969e-05	0.012029	0.074629	chr6	136438191	PDE7B	368101	plus	S
cg21240474	48928	1.04845e-08	1.89542e-05	0.0926136	chr6	138019013		368361	plus	S
cg24394337	49357	0	0	0.425574	chr6	149068216	UST	369442	plus	S
cg18490269	50948	1.71222e-05	0.0162304	0.00863239	chr7	1849928		376349	plus	S
cg23975846	51047	1.10898e-07	0.000169696	0.0135615	chr7	2638680	IQCE;IQCE	377351	plus	S
cg09258022	51312	6.59273e-06	0.0068895	0.0337684	chr7	6057349	AIMP2	378856	plus	S
cg09894929	51454	4.24271e-08	6.85967e-05	0.0754634	chr7	8473578	NXPH1	379366	plus	S
cg08960663	53575	6.21928e-06	0.00657948	0.105366	chr7	63893895	LOC649395	385685	plus	S
cg05002615	53713	3.16145e-06	0.0036025	0.0113443	chr7	68326108		386095	plus	S
cg03897712	53925	1.79787e-05	0.0167823	0.0544969	chr7	73442370	ELN;ELN;ELN;ELN;ELN	386679	plus	S
cg12278697	54037	1.19342e-10	2.93866e-07	0.0644879	chr7	75572817	POR;SNORA14A	386999	plus	S
cg13831540	56239	7.13156e-07	0.00092313	0.0288801	chr7	130128420	MESTIT1;MEST	394117	plus	S
cg22625953	56674	8.96949e-11	2.24739e-07	0.0116934	chr7	138555959	KIAA1549;KIAA1549	395171	plus	S
cg08235947	57717	5.42916e-10	1.16308e-06	0.0140889	chr7	158039076	PTPRN2;PTPRN2;PTPRN2	400028	plus	S
cg06518714	58332	5.70404e-05	0.0454262	0.0416613	chr8	9870454		402858	plus	S
cg16190018	59432	0	0	0.39816	chr8	30585628	GSR	406256	plus	S
cg15160198	60605	1.91617e-05	0.0176938	0.0135237	chr8	65711369	CYP7B1	409689	plus	S
cg24326075	61695	1.77948e-05	0.01672	0.105608	chr8	99999681		412659	plus	S
cg04552799	61701	1.31902e-05	0.0128441	0.0208147	chr8	100246786	VPS13B;VPS13B	412675	plus	S
cg18159684	61890	4.44353e-06	0.00489423	0.0694746	chr8	103839282	AZIN1;AZIN1	413197	plus	S
cg21803052	62747	1.75283e-05	0.0165057	0.00846795	chr8	128748088	MYC	415140	plus	S
cg06867822	63309	2.53564e-06	0.00294248	0.0104429	chr8	142030569		416430	plus	S
cg03612190	63575	4.90455e-07	0.000672378	0.0205994	chr8	144565290	ZC3H3	417980	plus	S
cg26606393	63605	4.91192e-07	0.000672378	0.0129209	chr8	144776974	ZNF707;ZNF707;ZNF707	418216	plus	S
cg26572973	63680	3.82828e-05	0.0322883	0.0689886	chr8	145728501	GPT	419166	plus	S
cg12420104	63755	1.45602e-05	0.0140504	0.0863883	chr9	977109	DMRT3	419639	plus	S
cg14196303	63870	8.24008e-13	2.82441e-09	0.14816	chr9	6757347	KDM4C;KDM4C;KDM4C;KDM4C	419963	plus	S
cg14087715	65432	3.89844e-05	0.0327512	0.102931	chr9	116107799		423814	plus	S
cg13671590	65675	6.02554e-06	0.00643054	0.111972	chr9	125056607	MRRF;MRRF	424391	plus	S
cg01211109	65794	6.81323e-06	0.0071026	0.0531068	chr9	127962544	RABEPK	424740	plus	S
cg21223341	66414	3.11552e-10	6.84546e-07	0.0175776	chr9	136653337	VAV2;VAV2	426550	plus	S
cg13806356	66608	1.79283e-05	0.0167823	0.20661	chr9	138679950	KCNT1	427092	plus	S
cg13947243	66747	1.98022e-05	0.0181678	0.0530723	chr9	139782892	TRAF2	427766	plus	S

## Sheet: BWS18_hyper
row.names	regionID	Pvalue_M	AdjustedPvalue_M	Betadif	chr	pos	Genename	Index	direction	significance
cg07912402	22	1.55082e-06	0.00185603	0.00936277	chr1	989305	AGRN	339	plus	S
cg10122878	223	1.30385e-06	0.00160529	0.0458394	chr1	2941375		2812	plus	S
cg00042356	666	1.02944e-06	0.00130493	0.0261917	chr1	8021962	PARK7;PARK7	5405	plus	S
cg09798313	2536	8.34258e-06	0.00844266	0.0990831	chr1	28966889	TAF12;TAF12	12199	plus	S
cg11916186	3047	0	0	0.294775	chr1	36689760	THRAP3	14118	plus	S
cg06510397	4581	5.18704e-05	0.0429038	0.0141282	chr1	61523012		19439	plus	S
cg06748470	4781	1.09019e-07	0.00016682	0.0135454	chr1	65467980		19935	plus	S
cg27543672	5258	2.03594e-05	0.0190878	0.140609	chr1	84541035		21186	plus	S
cg19692149	5323	4.00019e-05	0.0342096	0.071453	chr1	85670783		21412	plus	S
cg25032124	6192	3.99649e-05	0.0342096	0.166384	chr1	110946480	HBXIP	24108	plus	S
cg10628295	6693	6.10737e-05	0.0486382	0.147703	chr1	120389211	NBPF7	25777	plus	S
cg17859048	6990	0	0	0.438776	chr1	151170906	PIP5K1A;PIP5K1A;PIP5K1A;PIP5K1A	26994	plus	S
cg13422362	7871	2.65976e-07	0.000379863	0.0465799	chr1	164197241		30944	plus	S
cg13550751	8518	1.52101e-05	0.0146446	0.0909997	chr1	179194565	ABL2;ABL2;ABL2;ABL2;ABL2	32689	plus	S
cg04640821	10433	5.46514e-07	0.000748105	0.116485	chr1	222638561		38172	plus	S
cg01060040	10715	1.21128e-05	0.0118218	0.103765	chr1	227565776		39102	plus	S
cg21220147	10871	0	0	0.521167	chr1	229694657	ABCB10	39875	plus	S
cg12506775	67341	5.27407e-05	0.0432066	0.0496641	chr10	5734571	C10orf18	44568	plus	S
cg15843567	68200	0	0	0.39615	chr10	26223206	MYO3A;MYO3A	47125	plus	S
cg14526047	69169	3.71891e-10	8.5208e-07	0.0235607	chr10	50887616	C10orf53;C10orf53	49770	plus	S
cg15353031	69169	6.9256e-07	0.000918673	0.0961088	chr10	50887632	C10orf53;C10orf53	49771	plus	S
cg10505163	69950	5.41189e-05	0.0440645	0.00768545	chr10	73466728	CDH23	51810	plus	S
cg14149699	72561	8.18074e-06	0.00832562	0.0682896	chr10	122610679	WDR11	59917	plus	S
cg09872760	72849	6.81748e-10	1.4903e-06	0.0661665	chr10	126822658	CTBP2;CTBP2	60907	plus	S
cg00405688	72990	2.99977e-05	0.0268323	0.268996	chr10	129534182	FOXI2	61253	plus	S
cg23779377	73324	9.58263e-06	0.00951926	0.014653	chr10	134119443	STK32C	62918	plus	S
cg01585333	73710	1.50457e-12	4.99724e-09	0.316762	chr11	2021915		66984	plus	S
cg15889804	74079	1.50893e-06	0.00181604	0.0345472	chr11	6947647	ZNF215	69130	plus	S
cg22155376	74740	5.18503e-06	0.00545837	0.0396298	chr11	17591837		70961	plus	S
cg00795268	75475	6.18654e-09	1.17286e-05	0.0426442	chr11	36294323	COMMD9;COMMD9	73156	plus	S
cg00522883	76091	8.21469e-06	0.00834036	0.132744	chr11	57194120	SLC43A3;SLC43A3;SLC43A3	75162	plus	S
cg21833459	76190	2.91131e-06	0.00329992	0.12851	chr11	58873955	FAM111B;FAM111B;FAM111B	75559	plus	S
cg10712687	78304	9.22955e-08	0.000143798	0.00904254	chr11	92714801	MTNR1B	84493	plus	S
cg06560282	78670	1.61279e-07	0.000239934	0.0730166	chr11	103830847	PDGFD;PDGFD	85427	plus	S
cg26647139	79158	4.2899e-13	1.55766e-09	0.287865	chr11	115375714	CADM1;CADM1	86863	plus	S
cg03761649	81271	3.14117e-05	0.0279222	0.0158457	chr12	8850719	RIMKLB;RIMKLB	93694	plus	S
cg06077899	82255	5.7685e-12	1.71635e-08	0.282596	chr12	32832894	DNM1L;DNM1L;DNM1L	96161	plus	S
cg16438602	83110	1.3814e-05	0.0133604	0.0717599	chr12	53721673	SP7	99295	plus	S
cg24979630	84237	5.82893e-05	0.0467686	0.0216807	chr12	80329299	PPP1R12A;PPP1R12A	103344	plus	S
cg19004285	84636	5.14564e-05	0.0427264	0.0851305	chr12	95468616	NR2C1;NR2C1;NR2C1	104283	plus	S
cg19013339	84679	1.32325e-08	2.44377e-05	0.0818325	chr12	96052514	NTN4	104379	plus	S
cg19612376	85466	1.35686e-07	0.000204702	0.0750095	chr12	111473587	CUX2	106753	plus	S
cg24309040	85479	1.88059e-07	0.000278806	0.00897196	chr12	111664600	CUX2	106802	plus	S
cg10827094	85855	4.13543e-08	6.89435e-05	0.0206013	chr12	117468061	FBXW8;FBXW8	108139	plus	S
cg19525226	86170	6.57808e-06	0.00682165	0.0281024	chr12	122461295	BCL7A;BCL7A	109442	plus	S
cg06702718	86919	1.40883e-11	3.91962e-08	0.021214	chr12	132921327		112709	plus	S
cg11199448	86976	1.16032e-06	0.0014494	0.0125104	chr12	133374911	GOLGA3	113360	plus	S
cg08010348	87119	1.0981e-06	0.00138379	0.0307547	chr13	21549230	LATS2	113962	plus	S
cg10416814	87212	5.00215e-07	0.000691356	0.0438069	chr13	23422850		114234	plus	S
cg14893163	88835	1.80598e-05	0.017157	0.0459402	chr13	58206036	PCDH17;PCDH17	118633	plus	S
cg11014582	89126	2.89528e-05	0.0261709	0.0607804	chr13	76333727	LMO7;LMO7	119195	plus	S
cg26080331	90310	5.61987e-05	0.0453459	0.0204358	chr13	113613318		123280	plus	S
cg17904717	91442	1.46768e-06	0.0017814	0.119771	chr14	52793391	PTGER2	128176	plus	S
cg16766249	92969	0	0	0.821779	chr14	79745154	NRXN3;NRXN3;NRXN3	132506	plus	S
cg21132104	95689	1.74555e-08	3.12926e-05	0.0693753	chr15	45694354	SPATA5L1;SPATA5L1	142323	plus	S
cg05695927	95689	2.73098e-10	6.29089e-07	0.130624	chr15	45694626	SPATA5L1;SPATA5L1;SPATA5L1	142331	plus	S
cg17842399	96066	0	0	0.386086	chr15	55700593	CCPG1;CCPG1	143346	plus	S
cg24745316	97262	1.27303e-06	0.00157641	0.0143375	chr15	73635840	HCN4	146529	plus	S
cg04645817	98232	6.79179e-07	0.000903721	0.119524	chr15	89693656	ABHD2;ABHD2	149495	plus	S
cg10550869	98240	5.23515e-05	0.0429879	0.0407627	chr15	89766299	RLBP1	149513	plus	S
cg13571576	98872	1.19448e-05	0.0117113	0.00816509	chr15	101587971	LRRK1	151695	plus	S
cg05349077	99021	6.49683e-08	0.00010348	0.00533702	chr16	630159	PIGQ;PIGQ	152487	plus	S
cg27336518	99032	2.55105e-10	5.94217e-07	0.00771475	chr16	722515	RHOT2	152656	plus	S
cg02286008	100728	3.43441e-07	0.000485641	0.0087752	chr16	30133247	MAPK3;MAPK3;MAPK3	160238	plus	S
cg06434738	101323	1.92663e-05	0.0181026	0.0925946	chr16	54115019	FTO	162382	plus	S
cg09621330	101350	1.23828e-05	0.012058	0.374375	chr16	54685651		162493	plus	S
cg07006325	101821	5.71458e-09	1.09306e-05	0.0134876	chr16	66835772	CCDC79	163976	plus	S
cg02525666	102213	5.28914e-05	0.0432474	0.0251185	chr16	71845903		165665	plus	S
cg02891945	103014	1.45761e-07	0.000217603	0.0695297	chr16	85863447		168216	plus	S
cg10529638	103423	4.0438e-06	0.00439743	0.0186563	chr16	89152029		170531	plus	S
cg08013914	103516	1.9984e-15	1.08383e-11	0.0107503	chr16	89764279	SPATA2L	171213	plus	S
cg23098912	104159	4.14932e-06	0.0044894	0.00572822	chr17	5993686	WSCD1	174367	plus	S
cg17753212	104201	3.46605e-08	5.86976e-05	0.0344993	chr17	6659562	XAF1;XAF1	174534	plus	S
cg10805004	104461	2.6268e-05	0.0240485	0.0856649	chr17	9327969	STX8	176273	plus	S
cg12601118	104482	4.65446e-10	1.0496e-06	0.0123729	chr17	9859123	GAS7;GAS7;GAS7;GAS7	176386	plus	S
cg07175110	105336	0	0	0.20963	chr17	27181923	ERAL1	179174	plus	S
cg08877781	105708	5.71765e-12	1.71312e-08	0.116789	chr17	33895609		180447	plus	S
cg02137421	107877	2.93209e-08	5.04527e-05	0.0515233	chr17	65442474	PITPNC1;PITPNC1	189357	plus	S
cg20030796	108234	9.70914e-10	2.03919e-06	0.00697744	chr17	72356254	BTBD17	190228	plus	S
cg09779152	108339	8.36306e-07	0.00108912	0.0523813	chr17	73205364	NUP85	190743	plus	S
cg13659928	108801	2.09827e-10	5.05066e-07	0.075098	chr17	77041687	C1QTNF1;C1QTNF1;C1QTNF1	192827	plus	S
cg08906153	108892	3.17725e-06	0.00355434	0.0054099	chr17	78061579	CCDC40	193487	plus	S
cg14073057	108988	6.33061e-08	0.000101208	0.00664562	chr17	78796363	RPTOR;RPTOR	193979	plus	S
cg25874123	109322	1.90268e-06	0.00222129	0.0705693	chr18	3220124	MYOM1;MYOM1	197192	plus	S
cg05114486	110623	2.61174e-07	0.000375509	0.0126196	chr19	875279	MED16	203048	plus	S
cg21449569	110800	5.11172e-05	0.0425272	0.00435234	chr19	2276322	C19orf35	204599	plus	S
cg18058596	111192	1.83609e-12	5.95972e-09	0.0141868	chr19	5694383	LONP1	206824	plus	S
cg00876266	111216	7.84286e-07	0.00103394	0.00198355	chr19	5915133	CAPS;CAPS	206989	plus	S
cg23307264	111257	4.44089e-16	2.53697e-12	0.321125	chr19	6424217	KHSRP	207160	plus	S
cg19819654	111547	5.01264e-05	0.0418654	0.00979943	chr19	10370550	MRPL4;MRPL4;MRPL4	208673	plus	S
cg07838427	111588	3.58601e-09	6.92094e-06	0.0105222	chr19	10665928	KRI1	208930	plus	S
cg14048463	111629	3.60711e-11	9.48153e-08	0.00781712	chr19	11145635	SMARCA4;SMARCA4;SMARCA4;SMARCA4;SMARCA4;SMARCA4;SMARCA4	209182	plus	S
cg12218406	112230	2.14706e-08	3.78569e-05	0.00622531	chr19	18120692	ARRDC2;ARRDC2	212506	plus	S
cg03117053	112673	8.36889e-10	1.78393e-06	0.00724511	chr19	34263644	CHST8;CHST8;CHST8	214530	plus	S
cg01102311	112843	3.42306e-06	0.00379956	0.088617	chr19	36644751	COX7A1	215533	plus	S
cg17629793	113297	2.76112e-05	0.0251172	0.0353366	chr19	42580205	ZNF574	217784	plus	S
cg27297025	113668	4.49649e-06	0.00481637	0.00695872	chr19	47259588	FKRP;FKRP	219796	plus	S
cg24030908	113682	3.59346e-05	0.0311668	0.0273321	chr19	47523850	NPAS1	219873	plus	S
cg06936631	114043	2.83909e-05	0.0257173	0.0167302	chr19	51171997	SHANK1	221938	plus	S
cg11668770	114493	4.70047e-05	0.0395667	0.0150292	chr19	56125740		224151	plus	S
cg21911021	114643	5.158e-05	0.0427461	0.132685	chr19	58095011	ZIK1	224906	plus	S
cg04571418	12553	1.06793e-06	0.00134974	0.0324441	chr2	10723504	NOL10	228096	plus	S
cg23725394	13140	1.72929e-08	3.11313e-05	0.0154203	chr2	25057656	ADCY3	229666	plus	S
cg11798660	13180	1.43329e-05	0.0138311	0.0990493	chr2	25504398	DNMT3A;DNMT3A;DNMT3A	229825	plus	S
cg21153839	13288	1.71189e-06	0.00202057	0.0997756	chr2	27190789		230231	plus	S
cg14957547	13829	0	0	0.37636	chr2	38303386	CYP1B1	231759	plus	S
cg08385486	15595	3.37628e-05	0.0296723	0.0617046	chr2	74874383	C2orf65	236919	plus	S
cg06840305	16215	5.25227e-07	0.000721272	0.0332674	chr2	98409069	TMEM131	238943	plus	S
cg14612684	16746	4.67203e-08	7.66958e-05	0.0867214	chr2	108863679	SULT1C3	240329	plus	S
cg13226232	17460	1.85789e-08	3.31677e-05	0.00777004	chr2	128158601		242378	plus	S
cg02913521	17665	5.80519e-05	0.0466655	0.106375	chr2	131792238	ARHGEF4;ARHGEF4	243052	plus	S
cg22940655	18806	4.60764e-05	0.0388617	0.201898	chr2	168275428		245535	plus	S
cg26521561	19874	1.57188e-06	0.00187078	0.0942619	chr2	198283608	SF3B1;SF3B1	248685	plus	S
cg09240763	19921	2.68085e-05	0.024491	0.0510178	chr2	200330851		248891	plus	S
cg21498125	21057	7.98513e-07	0.00104626	0.0420987	chr2	223725459	ACSL3;ACSL3	252281	plus	S
cg15578535	21606	5.43901e-06	0.00567002	0.0655815	chr2	235356655		253906	plus	S
cg17628660	115035	3.01462e-06	0.00339903	0.0923386	chr20	5097219	PCNA;PCNA	258445	plus	S
cg23610041	115789	2.55058e-08	4.42434e-05	0.0453714	chr20	39320926		262120	plus	S
cg06222087	116421	1.84091e-05	0.0173733	0.0802818	chr20	60638858	TAF4	265177	plus	S
cg19199752	117321	1.35025e-06	0.00165765	0.0053008	chr21	45730236	PFKL;PFKL	269576	plus	S
cg11188659	117384	4.74229e-05	0.0398405	0.00660465	chr21	46368313	C21orf70	269870	plus	S
cg17936155	117854	2.79742e-05	0.0253934	0.0340184	chr22	23487417	RAB36	271977	plus	S
cg09888620	118587	7.92699e-14	3.20412e-10	0.00981903	chr22	40045704	CACNA1I;CACNA1I	275198	plus	S
cg00793273	118917	3.00813e-06	0.00339903	0.0877486	chr22	46430842		276740	plus	S
cg14623735	23984	2.86748e-11	7.67869e-08	0.0123853	chr3	42265667	TRAK1	282839	plus	S
cg20746084	24142	3.20645e-06	0.00357766	0.0430025	chr3	44666508	ZNF197;ZNF197	283392	plus	S
cg03153775	24190	8.87139e-06	0.00890164	0.0831326	chr3	45185028	CDCP1;CDCP1	283560	plus	S
cg12443367	25005	1.56068e-06	0.00186263	0.107161	chr3	57557788	ARF4	287006	plus	S
cg09449927	25421	5.13166e-06	0.00541549	0.128869	chr3	65983019	MAGI1;MAGI1;MAGI1	287893	plus	S
cg26680097	25579	9.20571e-06	0.00919403	0.0124493	chr3	70048832		288245	plus	S
cg16824024	25748	3.44726e-05	0.0302044	0.0783751	chr3	73092158	PPP4R2	288581	plus	S
cg01876514	28355	2.77352e-06	0.00317736	0.0467527	chr3	151180389		295783	plus	S
cg12741994	28850	0	0	0.409253	chr3	170137321	CLDN11	297215	plus	S
cg02844611	29376	9.88901e-06	0.00976268	0.0468532	chr3	183273894	KLHL6	298379	plus	S
cg02954052	30006	2.8832e-06	0.00328544	0.0191283	chr3	194324527	TMEM44;TMEM44;TMEM44;TMEM44	300233	plus	S
cg08204843	30237	4.81805e-05	0.0403977	0.0228336	chr3	197237154	BDH1;BDH1;BDH1	301054	plus	S
cg04824913	30348	3.12308e-05	0.0278192	0.10249	chr4	887549	GAK	301808	plus	S
cg20792107	30382	0	0	0.440966	chr4	1243087	C4orf42;CTBP1;CTBP1	302318	plus	S
cg14525379	30432	5.98795e-08	9.60889e-05	0.038488	chr4	1671864	FAM53A	302801	plus	S
cg25137365	31123	9.7982e-07	0.00126069	0.0353779	chr4	10089904	WDR1;WDR1	305935	plus	S
cg22171358	31392	5.40786e-05	0.0440645	0.0409429	chr4	17934261	LCORL;LCORL	306649	plus	S
cg01493016	31598	2.35145e-12	7.40804e-09	0.349066	chr4	25657403	SLC34A2	307120	plus	S
cg04236735	32600	2.06974e-06	0.00240324	0.0720505	chr4	71658722	RUFY3;RUFY3	309891	plus	S
cg14201545	34510	5.25003e-07	0.000721272	0.0829307	chr4	140450629	SETD7	314995	plus	S
cg11875744	34758	1.00537e-06	0.00128584	0.0891269	chr4	147177156	SLC10A7	315660	plus	S
cg17326403	36233	6.26388e-07	0.000846623	0.0473957	chr5	645659	CEP72	320127	plus	S
cg20010012	37625	1.6297e-05	0.015586	0.0583327	chr5	41870316	OXCT1	324742	plus	S
cg16306043	39021	1.01219e-06	0.00129071	0.0657576	chr5	83681955	EDIL3	328608	plus	S
cg21153697	39065	3.23767e-05	0.0286611	0.0197582	chr5	87437337		328693	plus	S
cg11080549	39209	4.56808e-05	0.0386658	0.0287468	chr5	92909968	FLJ42709;FLJ42709	329105	plus	S
cg26911243	39386	4.9074e-07	0.000680454	0.122221	chr5	96401915		329602	plus	S
cg18505978	39451	6.02266e-05	0.0481427	0.0614657	chr5	100241630		329761	plus	S
cg24156716	40708	5.09362e-06	0.00538862	0.0545624	chr5	137093831		333180	plus	S
cg06995966	40710	2.40853e-05	0.0221925	0.167992	chr5	137204467	MYOT;MYOT	333188	plus	S
cg26207908	41257	1.35447e-14	6.52058e-11	0.403689	chr5	145582897	RBM27	335476	plus	S
cg08369580	41525	5.4405e-05	0.0440645	0.0144115	chr5	149828673	RPS14;RPS14;RPS14	336220	plus	S
cg00540540	42139	2.13044e-05	0.0198867	0.0185758	chr5	167219531	ODZ2	337874	plus	S
cg00175734	43701	7.17696e-08	0.000113052	0.0420572	chr6	8082136	EEF1E1;EEF1E1	343475	plus	S
cg18202405	43819	4.9819e-06	0.00529312	0.074483	chr6	11185142	NEDD9;NEDD9	343928	plus	S
cg22223441	43874	5.65467e-05	0.0455409	0.0540862	chr6	11920499		344028	plus	S
cg21479132	44642	6.65282e-06	0.00686853	0.0900453	chr6	26055353		345782	plus	S
cg19084075	44650	3.8435e-08	6.43269e-05	0.18491	chr6	26124329	HIST1H2AC;HIST1H2BC	345838	plus	S
cg12315302	44656	7.48266e-08	0.000117436	0.201751	chr6	26189340	HIST1H4D	345897	plus	S
cg12319423	44881	1.30996e-07	0.000198325	0.0886932	chr6	28555539	SCAND3	347167	plus	S
cg17394649	44979	2.22045e-16	1.35909e-12	0.463086	chr6	29760164	HCG4	348512	plus	S
cg06754079	45004	9.82814e-08	0.00015257	0.114913	chr6	30079645	TRIM31	349096	plus	S
cg18055610	45006	1.97803e-08	3.5166e-05	0.155434	chr6	30095419		349130	plus	S
cg08548396	45006	7.4607e-14	3.07364e-10	0.107911	chr6	30095549		349133	plus	S
cg16123269	45011	1.95686e-09	3.86373e-06	0.464686	chr6	30135113	TRIM15	349280	plus	S
cg13252226	45011	3.36758e-07	0.000477767	0.394677	chr6	30135162	TRIM15	349281	plus	S
cg08457178	45054	3.24185e-14	1.41734e-10	0.207141	chr6	30711636	IER3;FLOT1	350695	plus	S
cg10715333	45085	8.74862e-11	2.23119e-07	0.0664367	chr6	31018523		351092	plus	S
cg11990058	45219	4.28861e-05	0.0364579	0.0196408	chr6	32811502	PSMB8;PSMB8	355341	plus	S
cg13826470	45246	1.40414e-07	0.000210354	0.135863	chr6	33290842	DAXX;DAXX;DAXX;DAXX	357224	plus	S
cg26521092	45246	6.59149e-06	0.00682165	0.0631969	chr6	33290857	DAXX;DAXX;DAXX;DAXX	357225	plus	S
cg22682201	45845	3.51838e-05	0.0307021	0.138687	chr6	41020847	APOBEC2	359458	plus	S
cg13163765	46290	4.44089e-16	2.53697e-12	0.432391	chr6	46620396	CYP39A1;CYP39A1;SLC25A27	361116	plus	S
cg22301664	46914	1.49594e-08	2.72743e-05	0.00751885	chr6	74072820	C6orf221	362730	plus	S
cg06211904	47821	3.13805e-06	0.00351968	0.0419551	chr6	108960152	FOXO3;FOXO3	365518	plus	S
cg01985595	48843	6.14709e-06	0.00639262	0.098691	chr6	136479501	PDE7B	368104	plus	S
cg24394337	49357	0	0	0.432327	chr6	149068216	UST	369442	plus	S
cg12794224	49525	8.13705e-06	0.00830087	0.0809523	chr6	151646761	AKAP12;AKAP12;AKAP12	369944	plus	S
cg08911638	50430	3.55553e-07	0.000499471	0.0130029	chr6	167708827	UNC93A;UNC93A	372522	plus	S
cg09279942	50567	3.5821e-06	0.0039556	0.00842866	chr6	169092523		373292	plus	S
cg12114933	50626	3.54201e-05	0.0308038	0.0696968	chr6	169631139	THBS2	373515	plus	S
cg12845678	51259	1.19731e-05	0.0117122	0.00682312	chr7	5388781	TNRC18	378544	plus	S
cg18451131	51259	1.45931e-06	0.00177628	0.0127171	chr7	5396268	TNRC18	378567	plus	S
cg19151665	51780	3.85821e-05	0.0331942	0.0303693	chr7	22122819		380250	plus	S
cg11755819	51891	8.41264e-06	0.00848105	0.00693493	chr7	23749852	STK31;STK31;STK31;STK31;STK31	380577	plus	S
cg09159795	57274	8.35485e-06	0.00844266	0.0402768	chr7	151127123	CRYGN	397512	plus	S
cg02886375	57949	1.32217e-08	2.44377e-05	0.0193425	chr8	1244286		401314	plus	S
cg26101170	58371	2.75473e-09	5.36491e-06	0.0100309	chr8	10480545	RP1L1	402996	plus	S
cg19840732	58955	5.1914e-13	1.86915e-09	0.274613	chr8	22723208	PEBP4	404788	plus	S
cg10399402	59170	2.05656e-09	4.04196e-06	0.0545245	chr8	26496661	DPYSL2	405507	plus	S
cg03266297	59616	3.30466e-08	5.61866e-05	0.128792	chr8	37641112		406725	plus	S
cg22513169	59632	0	0	0.387867	chr8	37756965	RAB11FIP1;RAB11FIP1;RAB11FIP1;RAB11FIP1	406794	plus	S
cg15160198	60605	6.53205e-07	0.000874592	0.0183415	chr8	65711369	CYP7B1	409689	plus	S
cg14427528	63955	8.08877e-07	0.00105661	0.0733055	chr9	16204159		420148	plus	S
cg00785738	64217	0	0	0.315969	chr9	35617323	CD72	420851	plus	S
cg14351767	64295	2.84611e-06	0.00325182	0.0289606	chr9	37442137	ZBTB5	421113	plus	S
cg13490403	65669	9.91433e-08	0.000153352	0.121507	chr9	124982413	LHX6;LHX6	424361	plus	S

## Sheet: BWS19_hyper
row.names	regionID	Pvalue_M	AdjustedPvalue_M	Betadif	chr	pos	Genename	Index	direction	significance
cg27235337	165	2.04024e-05	0.0197527	0.0490024	chr1	2334785	RER1	2192	plus	S
cg09358618	332	6.44576e-06	0.00758716	0.0641933	chr1	3801728	DFFB	4004	plus	S
cg09022921	530	9.98734e-12	3.45092e-08	0.00789927	chr1	6649009	ZBTB48	4966	plus	S
cg11977919	691	5.41744e-07	0.000834941	0.00853554	chr1	8263776		5459	plus	S
cg24502224	949	2.59129e-09	5.96912e-06	0.0144402	chr1	10684339	PEX14	6349	plus	S
cg14841628	1406	8.23567e-06	0.00940966	0.0555239	chr1	16258280	SPEN	7872	plus	S
cg15453997	2472	1.31108e-08	2.70068e-05	0.0579822	chr1	28160871	PPP1R8;PPP1R8;SCARNA1;PPP1R8	11924	plus	S
cg06357549	2714	3.21778e-08	6.35334e-05	0.013918	chr1	32145548	COL16A1	12774	plus	S
cg06709178	3169	3.68189e-09	8.30277e-06	0.0107784	chr1	38328759	INPP5B	14589	plus	S
cg23638624	3511	1.91245e-09	4.57766e-06	0.0571233	chr1	43031887	CCDC30	15795	plus	S
cg27393126	5032	3.48221e-06	0.00434978	0.029811	chr1	75139364	C1orf173;C1orf173	20633	plus	S
cg12604058	5142	7.98768e-06	0.00917525	0.029157	chr1	78353349	NEXN	20955	plus	S
cg26680238	5421	2.24633e-05	0.0213405	0.0112118	chr1	87797316	LMO4	21709	plus	S
cg09804647	5530	5.08525e-08	9.55617e-05	0.0748698	chr1	90825072		21959	plus	S
cg23080355	5738	9.12287e-06	0.0101526	0.055381	chr1	95119714		22707	plus	S
cg23649784	7364	9.04967e-10	2.24126e-06	0.00997292	chr1	156105746	LMNA;LMNA;LMNA	28983	plus	S
cg08480098	7456	1.84294e-05	0.018236	0.2238	chr1	156906550	ARHGEF11;MIR765;ARHGEF11	29558	plus	S
cg11912330	7730	4.13003e-14	2.35938e-10	0.0459946	chr1	161228674	PCP4L1;PCP4L1	30563	plus	S
cg14180938	8310	1.2306e-09	3.0129e-06	0.0686277	chr1	173682610	KLHL20	32151	plus	S
cg02367655	8452	1.44437e-05	0.014854	0.168923	chr1	178064623	RASAL2;LOC100302401	32544	plus	S
cg20996887	11684	1.51949e-06	0.00207336	0.0903822	chr1	246136645	SMYD3;SMYD3	42040	plus	S
cg15843567	68200	0	0	0.391661	chr10	26223206	MYO3A;MYO3A	47125	plus	S
cg27462540	68395	3.75236e-06	0.00464659	0.0785493	chr10	30509885		47677	plus	S
cg02023345	69480	3.42243e-05	0.0299469	0.364449	chr10	63212226	TMEM26	50483	plus	S
cg16124546	70062	1.38378e-05	0.0143905	0.0127535	chr10	74927855	ECD;FAM149B1;ECD;ECD;ECD	52135	plus	S
cg04545398	71851	6.07334e-05	0.048821	0.0340453	chr10	105819003	COL17A1	57915	plus	S
cg13742952	73130	1.04021e-05	0.0114278	0.0117799	chr10	131567801		61801	plus	S
cg07108512	73387	3.26321e-06	0.00411218	0.0181633	chr10	134583187	INPP5A	63432	plus	S
cg24748548	73447	8.74328e-06	0.0098842	0.00988626	chr10	135153961		64523	plus	S
cg03610629	73538	7.54952e-15	5.21715e-11	0.0133805	chr11	611114	PHRF1	65327	plus	S
cg12616935	73811	5.14221e-05	0.0426852	0.126842	chr11	2872858		67879	plus	S
cg25222252	74263	5.28741e-06	0.00638148	0.393114	chr11	9595204	WEE1;WEE1	69708	plus	S
cg15037334	74420	1.12377e-07	0.000198142	0.0770967	chr11	11967196	USP47	70099	plus	S
cg08356509	74564	3.82745e-05	0.0329296	0.0802216	chr11	13739536	FAR1	70378	plus	S
cg26608883	74621	5.66941e-05	0.0460055	0.0594629	chr11	15095024	CALCB	70599	plus	S
cg02907374	74621	3.4845e-05	0.0303446	0.0444551	chr11	15095028	CALCB	70600	plus	S
cg20949700	74920	1.89051e-05	0.0186636	0.0553949	chr11	20044468	NAV2;NAV2;NAV2;NAV2	71466	plus	S
cg12426748	74979	9.06132e-07	0.00130281	0.119269	chr11	22454152		71701	plus	S
cg02123280	74979	2.22022e-07	0.000368709	0.113359	chr11	22454233		71702	plus	S
cg01948390	74988	8.98151e-06	0.0100738	0.0275649	chr11	22850866	SVIP	71750	plus	S
cg11204665	75192	3.34219e-06	0.00419935	0.0819169	chr11	31464984	IMMP1L	72230	plus	S
cg27452185	78299	3.12903e-08	6.20672e-05	0.00638877	chr11	92648753		84473	plus	S
cg16172672	78970	1.39685e-07	0.000237496	0.0435441	chr11	111851498	DIXDC1;DIXDC1	86338	plus	S
cg05797952	79427	1.77636e-15	1.58561e-11	0.125958	chr11	118889071	TRAPPC4;RPS25	87773	plus	S
cg07478335	79453	6.82819e-10	1.72093e-06	0.00700914	chr11	119044743	NLRX1;NLRX1	87937	plus	S
cg01845764	80094	4.48016e-09	9.94585e-06	0.0696502	chr11	127112911		89730	plus	S
cg14858786	81082	4.02239e-05	0.0345374	0.0063136	chr12	6436676	PLEKHG6;PLEKHG6;PLEKHG6	92736	plus	S
cg15384867	81277	5.82626e-05	0.0470112	0.0540923	chr12	8995808	A2ML1	93716	plus	S
cg06915545	81918	1.15822e-06	0.00162173	0.0883953	chr12	25157146		95336	plus	S
cg24809270	83305	3.42486e-05	0.0299469	0.00543151	chr12	56584075	SMARCC2;SMARCC2;SMARCC2	100570	plus	S
cg08002765	83679	3.62348e-06	0.00451104	0.134489	chr12	65567827	LEMD3;LEMD3	102089	plus	S
cg23262550	84929	1.5424e-05	0.0156599	0.107384	chr12	102916581		105082	plus	S
cg10827094	85855	2.35385e-05	0.0222632	0.0156855	chr12	117468061	FBXW8;FBXW8	108139	plus	S
cg04905392	86907	6.25459e-08	0.000116009	0.030641	chr12	132667060		112426	plus	S
cg17536039	86943	9.29433e-09	1.96168e-05	0.0864504	chr12	133154674	FBRSL1	113079	plus	S
cg21279579	87671	6.06764e-05	0.048821	0.0687261	chr13	30969767		115590	plus	S
cg14466075	88719	2.87237e-12	1.06093e-08	0.338972	chr13	52703160	NEK5	118352	plus	S
cg10918328	89438	1.14897e-05	0.012189	0.0335851	chr13	95355508		119966	plus	S
cg03371199	89500	2.46962e-06	0.00319675	0.168238	chr13	97646639	OXGR1	120194	plus	S
cg13990092	89500	6.23943e-06	0.00736452	0.0532396	chr13	97646731	OXGR1	120195	plus	S
cg13980446	90403	5.56517e-06	0.00664819	0.00720112	chr13	114312327	ATP4B	124141	plus	S
cg09537396	90410	4.53094e-05	0.0381396	0.0230315	chr13	114839831	RASA3	124379	plus	S
cg05054115	90729	4.12459e-05	0.0352033	0.143416	chr14	24422837	DHRS4;C14orf167;C14orf167;C14orf167;C14orf167	125806	plus	S
cg26338427	90729	1.35968e-05	0.0141743	0.152924	chr14	24422916	DHRS4;C14orf167;C14orf167;C14orf167;C14orf167	125808	plus	S
cg16360247	90729	2.29608e-05	0.0217648	0.148071	chr14	24422928	DHRS4;C14orf167;C14orf167;C14orf167;C14orf167	125809	plus	S
cg24555600	90729	1.99467e-05	0.0195567	0.0956389	chr14	24422956	DHRS4;C14orf167;C14orf167;C14orf167;C14orf167	125810	plus	S
cg10696199	90729	3.14794e-05	0.0282166	0.0840805	chr14	24423199	C14orf167;DHRS4;C14orf167;C14orf167;C14orf167	125811	plus	S
cg21041370	91277	2.27716e-06	0.00298609	0.064453	chr14	50477157		127796	plus	S
cg01090926	92671	6.26304e-07	0.000951574	0.129921	chr14	75137805	KIAA0317	131602	plus	S
cg16398956	93862	5.34773e-05	0.0440629	0.118118	chr14	100212958		135016	plus	S
cg16285701	93905	5.03816e-06	0.00609782	0.0076767	chr14	100626089	DEGS2	135118	plus	S
cg02022488	94100	8.82571e-06	0.00995112	0.0422811	chr14	102702045	RAGE	136232	plus	S
cg11389960	94925	3.23882e-05	0.0287903	0.0564749	chr15	31277661	MTMR10	139709	plus	S
cg20596162	95666	2.4832e-05	0.0232301	0.111702	chr15	45408861	DUOXA2	142209	plus	S
cg19968840	95666	2.21601e-13	1.05496e-09	0.144647	chr15	45409319	DUOXA2	142211	plus	S
cg17842399	96066	0	0	0.404317	chr15	55700593	CCPG1;CCPG1	143346	plus	S
cg13048593	96067	2.49846e-07	0.000407892	0.0488505	chr15	55704519		143355	plus	S
cg23068558	96458	1.03206e-12	4.13265e-09	0.0371243	chr15	63220652		144334	plus	S
cg01030757	97276	1.23685e-05	0.0130206	0.0559328	chr15	73866328	NPTN;NPTN;NPTN;NPTN	146575	plus	S
cg16268380	97859	0	0	0.433984	chr15	81294324	MESDC1;MESDC1	148464	plus	S
cg04832360	98908	5.70889e-05	0.0462383	0.0091006	chr15	101845516	PCSK6;PCSK6	151826	plus	S
cg05865615	99041	1.16845e-05	0.0123612	0.0951306	chr16	810140	MSLN;MSLN	152836	plus	S
cg09172770	99103	1.10104e-06	0.00156207	0.0117369	chr16	1442942		153891	plus	S
cg08246323	99103	4.15758e-05	0.035344	0.00511711	chr16	1449434	UNKL	153900	plus	S
cg09294055	99336	6.17726e-06	0.00731128	0.00909476	chr16	3314419		155920	plus	S
cg06912227	99424	1.35314e-12	5.31891e-09	0.0104114	chr16	4053409	ADCY9	156292	plus	S
cg09816107	100446	2.59915e-05	0.0240098	0.100667	chr16	24755901	TNRC6A	159195	plus	S
cg07094993	102252	1.15178e-06	0.00161799	0.185727	chr16	72659952		165785	plus	S
cg07116312	103425	1.55404e-06	0.00211378	0.00513151	chr16	89173855	ACSF3;ACSF3;ACSF3	170582	plus	S
cg01714809	103783	3.25589e-05	0.0288821	0.0712954	chr17	1627706	WDR81;WDR81;WDR81;WDR81	172631	plus	S
cg00592510	103823	2.46033e-05	0.0231171	0.0518304	chr17	1957625	HIC1	172868	plus	S
cg23288674	105984	2.55033e-05	0.0237544	0.0313603	chr17	37730098		181578	plus	S
cg14457782	106343	4.66221e-08	8.87802e-05	0.164364	chr17	40937362	WNK4	183320	plus	S
cg19784903	106765	2.10221e-09	4.97628e-06	0.0124745	chr17	45786737	TBKBP1	185078	plus	S
cg25039879	107396	1.09473e-07	0.000194623	0.0408586	chr17	56429692	SUPT4H1	187702	plus	S
cg02118635	107419	2.21327e-05	0.0211201	0.0327139	chr17	56770003	RAD51C;TEX14;RAD51C;TEX14;RAD51C;RAD51C	187806	plus	S
cg25514328	108957	5.77316e-15	4.12257e-11	0.237781	chr17	78549324	RPTOR;RPTOR	193845	plus	S
cg11329058	108957	2.44839e-08	4.90199e-05	0.431192	chr17	78549358	RPTOR;RPTOR	193846	plus	S
cg18576374	108957	2.06216e-10	5.66375e-07	0.287058	chr17	78549371	RPTOR;RPTOR	193847	plus	S
cg09591867	109024	6.29937e-10	1.60655e-06	0.00932191	chr17	79098558	AATK	194463	plus	S
cg05396584	109142	5.90133e-10	1.51405e-06	0.0104973	chr17	80049347	FASN	195699	plus	S
cg05229454	109210	1.49207e-05	0.0152939	0.319615	chr17	80494379	FOXK2	196181	plus	S
cg15146859	110341	4.82266e-05	0.0402787	0.0110546	chr18	74961737	GALR1	201591	plus	S
cg24140841	110504	2.47469e-05	0.0232012	0.0120882	chr18	77642911	KCNG2	202300	plus	S
cg07478662	111143	1.05424e-10	3.01131e-07	0.0136105	chr19	5047466	KDM4B	206539	plus	S
cg22184096	111192	3.30814e-05	0.0292246	0.0105025	chr19	5694592	LONP1	206825	plus	S
cg20797216	111393	2.93967e-05	0.0267414	0.136041	chr19	8212234	FBN3	207926	plus	S
cg17499826	113587	1.2074e-07	0.00021115	0.119336	chr19	46284986	DMPK;DMPK;DMPK;DMPK	219347	plus	S
cg01086369	114016	4.02789e-13	1.74321e-09	0.0104394	chr19	50885373	NR1H2	221763	plus	S
cg15985184	114109	1.26566e-06	0.00174929	0.0735278	chr19	51830311	IGLON5	222284	plus	S
cg03775635	114173	5.68186e-07	0.000869439	0.0370182	chr19	52517812	ZNF614	222557	plus	S
cg16659026	114350	2.04232e-05	0.0197527	0.0362221	chr19	54617827	PRPF31;TFPT	223327	plus	S
cg02462879	11884	8.60962e-06	0.00975885	0.0729708	chr2	421480		225726	plus	S
cg02065293	12047	1.22711e-07	0.000212859	0.110669	chr2	1928480	MYT1L	226454	plus	S
cg15806038	12154	6.33954e-08	0.000117078	0.00595531	chr2	3601756	RNASEH1	226951	plus	S
cg11022928	14015	5.40076e-08	0.000101048	0.129835	chr2	42394068		232171	plus	S
cg18942222	14920	4.1675e-05	0.0353583	0.106363	chr2	63667788	C2orf86	234654	plus	S
cg01788568	15534	2.43226e-05	0.0229036	0.0098568	chr2	74154043	DGUOK;DGUOK	236532	plus	S
cg23690488	17014	3.73757e-08	7.27902e-05	0.0351138	chr2	114299609		241085	plus	S
cg26342671	17491	8.79844e-08	0.000158393	0.00707795	chr2	128432524	LIMS2;LIMS2;LIMS2	242514	plus	S
cg12495983	20618	2.65762e-08	5.29615e-05	0.0233615	chr2	216867894	MREG	250620	plus	S
cg20297017	20691	3.81985e-07	0.000599502	0.111961	chr2	217664798		250826	plus	S
cg21898226	20737	3.511e-08	6.869e-05	0.0642515	chr2	218231392	DIRC3	250891	plus	S
cg26577201	20872	1.27974e-05	0.0133735	0.00672841	chr2	219857793	CRYBA2;CRYBA2;CRYBA2	251430	plus	S
cg00063174	21260	8.88662e-06	0.00999351	0.00887949	chr2	228736253	WDR69	252716	plus	S
cg08034379	21260	4.13412e-05	0.0352145	0.0100591	chr2	228736324	WDR69	252718	plus	S
cg03392605	21294	3.08875e-05	0.0278024	0.025002	chr2	230656710	TRIP12	252803	plus	S
cg04979655	21541	7.18141e-08	0.000131492	0.0110031	chr2	234358327	DGKD;DGKD	253718	plus	S
cg09959495	21750	3.78463e-05	0.0326925	0.0736565	chr2	237029385	AGAP1;AGAP1	254351	plus	S
cg13537346	21836	2.83047e-05	0.0259686	0.080247	chr2	238265124	COL6A3;COL6A3;COL6A3	254606	plus	S
cg26804360	22020	2.03689e-05	0.0197527	0.00859338	chr2	239982769	HDAC4	255254	plus	S
cg00173098	114859	2.1685e-06	0.00285879	0.0885451	chr20	1445335	NSFL1C;NSFL1C;NSFL1C	257543	plus	S
cg16397629	115815	2.99319e-05	0.0271131	0.0334578	chr20	40093431	CHD6	262212	plus	S
cg11264863	115912	2.04562e-07	0.000342366	0.202795	chr20	43835661	SEMG1;SEMG1	262691	plus	S
cg04403809	115976	1.8697e-08	3.7787e-05	0.221037	chr20	44686493	SLC12A5;SLC12A5	263131	plus	S
cg06096175	116424	4.53015e-12	1.60411e-08	0.00701495	chr20	60701350	LSM14B	265200	plus	S
cg00397324	117125	3.17235e-12	1.15188e-08	0.0469964	chr21	42798594	MX1;MX1	268644	plus	S
cg01835446	119145	4.49969e-06	0.00549265	0.0323596	chr22	50845159	SAPS2	277911	plus	S
cg21395120	23239	0	0	0.723312	chr3	20227822	SGOL1;SGOL1;SGOL1;SGOL1;SGOL1;SGOL1	280854	plus	S
cg07139503	25286	7.64768e-07	0.00112989	0.0632032	chr3	63922542	ATXN7;ATXN7	287652	plus	S
cg10659680	25944	2.03597e-06	0.00270069	0.100347	chr3	86927466		288910	plus	S
cg07049323	27727	2.76653e-07	0.000442289	0.0129509	chr3	134758333	EPHB1	293808	plus	S
cg17614995	29365	1.67176e-06	0.00226669	0.0505361	chr3	183144880	MCF2L2	298330	plus	S
cg07364240	30182	3.37343e-05	0.02974	0.102963	chr3	196388687	LRRC33	300866	plus	S
cg01638225	30382	2.12273e-05	0.0203012	0.011069	chr4	1202930	LOC100130872;LOC100130872-SPON2	302221	plus	S
cg26188814	30389	1.48092e-09	3.60516e-06	0.00813124	chr4	1292205	MAEA;MAEA	302360	plus	S
cg03799405	30418	1.18533e-07	0.000208139	0.0162594	chr4	1595726		302727	plus	S
cg25585279	30533	4.44394e-05	0.037481	0.172662	chr4	2763026		303394	plus	S
cg00677217	30646	2.95131e-05	0.0267904	0.0426892	chr4	3747401		304086	plus	S
cg14218108	31150	3.18895e-05	0.0285245	0.0805052	chr4	10658271	CLNK	306010	plus	S
cg20506344	31376	6.18182e-05	0.0494149	0.0355407	chr4	17615962	MED28	306589	plus	S
cg10968187	31376	5.88315e-09	1.27953e-05	0.0448525	chr4	17616003	MED28	306590	plus	S
cg22773661	32115	4.31255e-05	0.0365166	0.279204	chr4	48492225	ZAR1	308637	plus	S
cg24401187	32855	5.95511e-09	1.28864e-05	0.0457127	chr4	77922792	SEPT11	310607	plus	S
cg04057033	33015	5.29949e-07	0.00081971	0.0138033	chr4	82350842	RASGEF1B	311032	plus	S
cg06531595	34060	1.74225e-06	0.00234464	0.0768432	chr4	120439736	PDE5A;PDE5A;PDE5A	313908	plus	S
cg05417615	34767	4.50295e-07	0.000699028	0.0325022	chr4	147443478	SLC10A7;SLC10A7	315683	plus	S
cg01597632	34767	1.8734e-09	4.50937e-06	0.0598315	chr4	147443489	SLC10A7;SLC10A7	315684	plus	S
cg21605061	34806	8.53154e-07	0.00123408	0.0833738	chr4	148709144	ARHGAP10	315811	plus	S
cg16385330	34878	2.50526e-06	0.00323311	0.0935666	chr4	151503878	LRBA;MAB21L2;MAB21L2	315943	plus	S
cg01691160	35090	8.55451e-07	0.00123408	0.061497	chr4	156340422		316589	plus	S
cg01543307	35742	1.60748e-05	0.016196	0.0598362	chr4	184390449		318332	plus	S
cg01377200	35779	2.05175e-05	0.0197547	0.011186	chr4	184938316	STOX2	318481	plus	S
cg07729537	35865	4.34889e-06	0.00532374	0.345226	chr4	186048714		318751	plus	S
cg13468418	35865	2.22045e-15	1.90273e-11	0.361027	chr4	186048907		318752	plus	S
cg27369096	36405	1.13243e-14	7.35144e-11	0.0240184	chr5	2169769		321604	plus	S
cg17496661	36487	1.26343e-07	0.000217999	0.0135106	chr5	3326343		321950	plus	S
cg19775071	38114	7.39001e-06	0.00860406	0.074414	chr5	59893187	DEPDC1B;DEPDC1B	326110	plus	S
cg20439288	38362	1.54987e-13	7.54604e-10	0.0349047	chr5	67584218	PIK3R1;PIK3R1	326732	plus	S
cg01105385	38362	7.77156e-14	4.0607e-10	0.178724	chr5	67584222	PIK3R1;PIK3R1	326733	plus	S
cg10427793	38831	2.79978e-05	0.0257421	0.0164808	chr5	78908035	PAPD4;PAPD4;PAPD4	328134	plus	S
cg26075213	38865	8.16267e-06	0.00935119	0.0806759	chr5	79554534		328229	plus	S
cg18349241	39123	2.03093e-05	0.0197527	0.0695713	chr5	89772071	POLR3G;MBLAC2	328941	plus	S
cg09714181	40249	7.25682e-06	0.00849516	0.0210246	chr5	126853350	PRRC1;PRRC1	331636	plus	S
cg07827630	40603	9.5625e-06	0.0105596	0.0732315	chr5	134735597	H2AFY;H2AFY;H2AFY;H2AFY	332809	plus	S
cg15613420	40603	1.43241e-05	0.0148242	0.129089	chr5	134735637	H2AFY;H2AFY;H2AFY;H2AFY	332811	plus	S
cg00060605	40907	4.12275e-08	7.92116e-05	0.0795749	chr5	139777061		333988	plus	S
cg12374003	41061	1.21557e-06	0.0016855	0.0551478	chr5	141380315	GNPDA1	335072	plus	S
cg14510905	41234	3.68882e-05	0.0319938	0.0506246	chr5	145040858		335415	plus	S
cg26207908	41257	5.55112e-15	4.0312e-11	0.431346	chr5	145582897	RBM27	335476	plus	S
cg21569714	41713	3.42145e-10	9.049e-07	0.0334413	chr5	153798362	GALNT10;GALNT10	336775	plus	S
cg10499102	43176	2.4276e-05	0.0229036	0.0411804	chr6	564040	EXOC2	341764	plus	S
cg01095518	43185	1.06815e-05	0.0116451	0.0664808	chr6	655849	EXOC2	341788	plus	S
cg15972264	43833	7.30717e-07	0.00108332	0.0126802	chr6	11279680	NEDD9	343958	plus	S
cg01400476	44308	5.59792e-10	1.44486e-06	0.104222	chr6	18387809	RNF144B;RNF144B	344974	plus	S
cg10503635	44971	1.10469e-06	0.00156208	0.0759605	chr6	29634213	MOG;MOG;MOG;MOG;MOG;MOG;MOG;MOG;MOG;MOG;MOG	348307	plus	S
cg04749732	44998	4.2778e-07	0.00066649	0.0684857	chr6	29978314	NCRNA00171	348743	plus	S
cg25964035	45003	1.10423e-05	0.0118959	0.0385983	chr6	30021725	NCRNA00171	348815	plus	S
cg07229198	45051	5.33002e-05	0.0440015	0.044013	chr6	30685635	MDC1	350542	plus	S
cg00106093	45255	2.08862e-10	5.69989e-07	0.0211653	chr6	33391341	SYNGAP1	357484	plus	S
cg22812331	45310	1.22473e-08	2.5473e-05	0.0926041	chr6	33869169		357838	plus	S
cg17386578	47514	3.7903e-13	1.65712e-09	0.414857	chr6	99394767	FBXL4	364480	plus	S
cg24211478	47703	3.00849e-05	0.0271942	0.0178023	chr6	106773719	ATG5	365116	plus	S
cg26679158	47908	1.92614e-05	0.0189281	0.111956	chr6	110676056	C6orf186	365756	plus	S
cg09577425	50162	3.20907e-05	0.02864	0.0252039	chr6	163731978	PACRG;PACRG;LOC285796;PACRG	371651	plus	S
cg06960413	50360	2.4159e-06	0.00314622	0.0415802	chr6	167013972	RPS6KA2;RPS6KA2	372276	plus	S
cg27176628	50490	2.99671e-07	0.000477308	0.00747511	chr6	168476656	FRMD1;FRMD1	372842	plus	S
cg20349432	50534	1.70926e-06	0.00231024	0.053453	chr6	168790653		373098	plus	S
cg20928945	50835	9.25115e-06	0.0102422	0.493744	chr7	960411	ADAP1	375057	plus	S
cg03667621	50901	5.61673e-05	0.0459048	0.0679646	chr7	1478715	MICALL2	375885	plus	S
cg02423579	51077	2.83129e-12	1.05486e-08	0.00935327	chr7	2872169	GNA12	377591	plus	S
cg22808692	51322	1.77021e-07	0.000298606	0.0084282	chr7	6193786	USP42	378914	plus	S
cg16846532	53242	5.7177e-06	0.00680495	0.136459	chr7	50634648	DDC	384779	plus	S
cg08604885	54903	1.10503e-05	0.0118959	0.139514	chr7	99516603	TRIM4;TRIM4	389890	plus	S
cg15870184	54903	4.54104e-06	0.00552738	0.0616887	chr7	99517151	TRIM4;TRIM4;TRIM4;TRIM4	389893	plus	S
cg10675666	54903	1.55261e-05	0.0157264	0.138368	chr7	99517192	TRIM4;TRIM4	389894	plus	S
cg16190388	55428	8.47518e-06	0.00963194	0.0548023	chr7	107601683	LAMB1	391924	plus	S
cg04861380	57203	2.60577e-05	0.0240098	0.00912832	chr7	150497663	TMEM176B;TMEM176B;TMEM176A;TMEM176B;TMEM176B	396965	plus	S
cg08359956	57203	6.23857e-05	0.0496831	0.0608899	chr7	150498205	TMEM176B;TMEM176B;TMEM176B;TMEM176B;TMEM176B;TMEM176A	396971	plus	S
cg06385227	57447	2.88569e-05	0.0263623	0.0268108	chr7	155252201	EN2	398214	plus	S
cg22417032	57632	6.95006e-08	0.000127802	0.0118537	chr7	157350867	PTPRN2;PTPRN2;PTPRN2	399234	plus	S
cg10243459	57662	1.08133e-05	0.0117292	0.00875637	chr7	157584081	PTPRN2;PTPRN2;PTPRN2	399616	plus	S
cg15453443	57663	3.63497e-05	0.0315908	0.0124518	chr7	157594102	PTPRN2;PTPRN2;PTPRN2	399637	plus	S
cg05423712	57867	1.3803e-11	4.62028e-08	0.0168725	chr8	605100		400781	plus	S
cg16719810	57900	4.64949e-05	0.0389844	0.0605985	chr8	865742		401032	plus	S
cg14499577	57970	2.50986e-05	0.0234284	0.150392	chr8	1414612		401506	plus	S
cg25350011	58167	4.88917e-05	0.0407548	0.315154	chr8	6419483	ANGPT2;ANGPT2;ANGPT2;MCPH1	402420	plus	S
cg25220625	58865	5.52648e-06	0.00664819	0.00795121	chr8	21868116		404320	plus	S
cg16142218	58987	2.10435e-05	0.0202158	0.269195	chr8	23101221	CHMP7;CHMP7	404921	plus	S
cg03330710	59029	3.82562e-05	0.0329296	0.118766	chr8	23563572	NKX2-6	405061	plus	S
cg12677267	59555	1.5241e-05	0.0155109	0.0760428	chr8	36602729		406581	plus	S
cg00225196	59607	2.03609e-05	0.0197527	0.248844	chr8	37556863		406673	plus	S
cg14152785	59607	5.5388e-05	0.0453754	0.0960657	chr8	37557185		406675	plus	S
cg03074188	59607	3.8395e-06	0.0047408	0.27842	chr8	37557348		406676	plus	S
cg15134714	59607	2.92178e-06	0.0037147	0.251991	chr8	37558448		406678	plus	S
cg20798740	59607	6.54172e-06	0.00767901	0.0918649	chr8	37560840		406680	plus	S
cg22280148	59607	2.03254e-05	0.0197527	0.199736	chr8	37561332		406681	plus	S
cg11214430	59921	3.72792e-07	0.000587224	0.00831345	chr8	42268294		407650	plus	S
cg27004182	60340	1.78411e-05	0.0177358	0.126047	chr8	56827013	LYN;LYN	408888	plus	S
cg14437606	60631	3.12205e-06	0.00395758	0.0639512	chr8	66932975	DNAJC5B	409768	plus	S
cg02246683	60808	2.43203e-06	0.00315763	0.0903754	chr8	71259403	NCOA2	410276	plus	S
cg06958453	60871	2.29079e-10	6.21205e-07	0.0185213	chr8	73480240	KCNB2	410473	plus	S
cg02903822	63027	1.25581e-08	2.59933e-05	0.0163622	chr8	134203379	WISP1;WISP1;WISP1;WISP1	415658	plus	S
cg15412718	63364	7.80826e-07	0.00114966	0.169332	chr8	142517806	FLJ43860	416845	plus	S
cg12143168	63515	2.24455e-05	0.0213405	0.068284	chr8	144099627	LY6E;LY6E;LOC100133669	417539	plus	S
cg09125402	63683	2.93333e-05	0.0267405	0.0114732	chr8	145770981	KIAA1688	419261	plus	S

[truncated: 20 more sheets: BWS1_hyper, BWS20_hyper, BWS21_hyper, BWS22_hyper, BWS23_hyper, BWS24_hyper, BWS25_hyper, BWS2_hyper, BWS3_hyper, BWS4_hyper, BWS5_hyper, BWS6_hyper, BWS7_hyper, BWS8_hyper, BWS9_hyper, MLID BWS1_hyper, MLID BWS2_hyper, MLID BWS3_hyper, MLID BWS4_hyper, MLID BWS5_hyper]
