# Supplementary material for: Genome-wide methylation profiling of Beckwith-Wiedemann syndrome patients without molecular confirmation after routine diagnostics
Source: Clin Epigenetics. 2019 Mar 21;11:53. doi: 10.1186/s13148-019-0649-6 (PMC6429826; doi:10.1186/s13148-019-0649-6)
Supplement: Supplementary file 4 — Table S3. The estimation of the cell types distribution. (CSV 4 kb) [file 13148_2019_649_MOESM4_ESM.csv]

	CD8T	CD4T	NK	Bcell	Mono	Gran	Group
6042316076_R01C01	0.132076431	0.177137069	0.011734345	0.140170264	0.072642548	0.491309264	control
6042316076_R02C02	0.063085658	0.001555464	0	0.066270771	0.133773612	0.746667633	control
6042316076_R03C02	0.131613929	0.127492484	0.093845195	0.124259238	0.072967183	0.479645461	control
6042316076_R04C02	0.025757779	0.147059799	0.095303425	0.148881495	0.135213307	0.501619672	control
6042316076_R05C02	0.076512853	0.172897983	0.006852704	0.103854225	0.080283256	0.579549037	control
6042316076_R06C02	0.088323686	0.18537344	0.027161577	0.258413456	0.059434211	0.409697278	control
7507867107_R05C01	0.111910697	0.214919262	0	0.189679198	0.085347507	0.43114858	control
7507867107_R06C01	0.039633907	0.087093741	0	0.264103527	0.142342765	0.505722381	control
7507867107_R01C02	0.18571703	0.354287922	0	0.205721381	-2.77E-20	0.287559863	control
7507867107_R02C02	0.086718741	0.238335645	0	0.154819047	0.038881645	0.506104617	control
6929718166_R05C01	0.099508434	0.224265441	0.000727088	0.172101138	0.051630337	0.47398489	control
6929718166_R06C01	0.269058576	0.184213734	0.08040112	0.218514682	0.051305977	0.221281212	control
6929718166_R01C02	0.095613641	0.268011404	0	0.265737337	0.021789703	0.377152783	control
6929718166_R02C02	0.085405107	0.188170842	0.053696356	0.200128789	0.055169008	0.444579337	control
7507867111_R05C01	0.09463222	0.289485318	0	0.20180333	0.035172661	0.397580203	control
6929718108_R06C01	0.089147029	0.099149774	0.039569528	0.177430839	0.097981517	0.525968013	control
7507867111_R06C01	0.168057498	0.221358305	0.001308575	0.259110583	0.05940955	0.312693204	control
7507867111_R01C02	0.108311823	0.291656343	0	0.198836208	0.059055836	0.370002634	control
7507867111_R02C02	0.094922775	0.312474059	0	0.231862666	0.035912952	0.352891099	control
7507867164_R05C01	0.166318356	0.247636356	0.123605608	0.194350012	0.049774047	0.260659546	control
6929718108_R01C02	0.120882059	0.301470326	0	0.137243899	0.082443076	0.371102867	control
7507867164_R06C01	0.081489657	0.24156886	0	0.171673535	0.118338896	0.416012489	control
6929718108_R02C02	0.140019169	0.361091807	0	0.237893751	0.043334617	0.232325092	control
7507867164_R01C02	0.062962623	0.113358147	0.034496606	0.12282678	0.16019568	0.531023036	control
7507867164_R02C02	0.153035731	0.348217963	0	0.274218293	0.034032418	0.230307701	control
6929718108_R05C01	0.093426193	0.298954729	0	0.156846909	0.045384	0.411839559	control
6042308168_R01C01	0.114772644	0.405443832	0.017269569	0.237152579	0.019448458	0.210871377	BWS1
6042308168_R03C01	0.132726652	0.297529097	0	0.196883875	0.019377067	0.359964943	BWS2
6042308168_R04C01	0.118862614	0.327962198	0	0.321882158	0.016409901	0.234261977	BWS3
6042308168_R05C01	0.174210702	0.424172596	0	0.135188486	0.067818502	0.198941812	BWS4
6042308168_R06C01	0.094812948	0.359985239	0	0.298021418	0.03327521	0.225153735	BWS5
6042308168_R01C02	0.088125635	0.366804381	2.17E-19	0.23151619	0	0.317884936	BWS6
6042308168_R02C02	0.128126528	0.396227163	0	0.194431819	0.021990877	0.265458881	BWS7
6042308168_R03C02	0.158720725	0.343183511	0	0.188680497	0.014643845	0.307280304	BWS8
6042308168_R04C02	0.115686727	0.073520502	0.089176189	0.112909992	0.108889233	0.519202153	BWS9
6042308168_R05C02	0.176179015	0.391155033	0	0.14353544	0.121433026	0.174863467	BWS10
6042308168_R06C02	0.054817139	0.090162829	0	0.106735064	0.179255803	0.604649549	BWS11
6042316076_R02C01	0.233953956	0.29913455	0	0.111124873	0.096503566	0.277003753	BWS12
7507867107_R03C02	0.156539779	0.292891762	0.013464848	0.10703755	0.105753787	0.356486803	BWS13
7507867107_R04C02	0.085830188	0.221117436	0.04388196	0.16943212	0.058398839	0.456424902	BWS14
7507867107_R05C02	0.15935845	0.383455502	0	0.253648423	0.003083207	0.232950811	BWS15
6929718166_R03C02	0.132214987	0.252227739	0	0.330125031	0.056370937	0.253801676	BWS16
6929718166_R04C02	0.135970838	0.36272806	0	0.19739386	0.00461482	0.324864776	BWS17
6929718166_R05C02	0.006982025	0.191907648	0.183908986	0.071552875	0.105255066	0.457311373	BWS18
6929718166_R06C02	0.135601184	0.374403492	-1.73E-18	0.205852201	0.077443145	0.232866794	BWS19
7507867111_R03C02	0.121952204	0.353629378	0	0.167619454	0.106033754	0.271190082	BWS20
7507867111_R04C02	0.109323563	0.323595495	0.011716583	0.230206882	0.063549082	0.281882008	BWS21
7507867111_R05C02	0.121201165	0.459719145	0	0.110113527	0.009578595	0.303366356	BWS22
7507867111_R06C02	0.124434319	0.256111276	0	0.17838494	0.035159078	0.422804694	BWS23
7507867164_R04C02	0.083663491	0.299996015	0.059792018	0.230764377	0.035581696	0.289168555	BWS24
7507867164_R05C02	0.07918335	0.327684388	0	0.166925604	0.065856185	0.360215721	BWS25
