# Supplementary material for: Genome-wide methylation profiling of Beckwith-Wiedemann syndrome patients without molecular confirmation after routine diagnostics
Source: Clin Epigenetics. 2019 Mar 21;11:53. doi: 10.1186/s13148-019-0649-6 (PMC6429826; doi:10.1186/s13148-019-0649-6)
Supplement: Supplementary file 5 — Table S4. The calculation of P values of the cell types distribution per patient. (XLSX 47 kb) [file 13148_2019_649_MOESM5_ESM.xlsx]

## Sheet: pval.cell.BWS1.csv
X

## Sheet: pval.cell.BWS10.csv
X

## Sheet: pval.cell.BWS11.csv
X

## Sheet: pval.cell.BWS12.csv
X

## Sheet: pval.cell.BWS13.csv
X

## Sheet: pval.cell.BWS14.csv
X

## Sheet: pval.cell.BWS15.csv
X

## Sheet: pval.cell.BWS16.csv
X

## Sheet: pval.cell.BWS17.csv
X

## Sheet: pval.cell.BWS18.csv
X

[truncated: 15 more sheets: pval.cell.BWS19.csv, pval.cell.BWS2.csv, pval.cell.BWS20.csv, pval.cell.BWS21.csv, pval.cell.BWS22.csv, pval.cell.BWS23.csv, pval.cell.BWS24.csv, pval.cell.BWS25.csv, pval.cell.BWS3.csv, pval.cell.BWS4.csv, pval.cell.BWS5.csv, pval.cell.BWS6.csv, pval.cell.BWS7.csv, pval.cell.BWS8.csv, pval.cell.BWS9.csv]
