# Supplementary material for: Genome-wide methylation profiling of Beckwith-Wiedemann syndrome patients without molecular confirmation after routine diagnostics
Source: Clin Epigenetics. 2019 Mar 21;11:53. doi: 10.1186/s13148-019-0649-6 (PMC6429826; doi:10.1186/s13148-019-0649-6)
Supplement: Supplementary file 7 — Table S6. Genomic locations of imprinted loci—COST regions. (CSV 2 kb) [file 13148_2019_649_MOESM7_ESM.csv]

	index	Chr	start	End	Gene_Nam	Number of informative probes	Number CpG within the region
1	1	chr1	40024626	40025540	PPIEL	4	39
2	10	chr6	160426558	160427561	IGF2R	2	74
3	11	chr6	170054504	170055618	WDR27	2	58
4	12	chr7	50848726	50851312	GRB10	9	171
5	13	chr7	94285537	94287960	PEG10	54	119
6	14	chr7	130130122	130134388	MEST	59	226
7	15	chr7	154862719	154863382	HTR5A	6	55
8	16	chr8	37604992	37606088	ERLIN2	7	37
9	17	chr8	141108147	141111081	PEG13	8	193
10	18	chr9	98075400	98075744	FANCC	2	26
11	19	chr10	121578046	121578727	INPP5F	4	52
12	2	chr1	68515433	68517545	DIRAS3	19	88
13	20	chr11	2018812	2024740	H19	46	250
14	21	chr11	2153991	2155112	IGF2_3'UTR	10	63
15	22	chr11	2168333	2169768	IGF2_DMR0	1	33
16	23	chr11	2719948	2722259	KCNQ1OT1	32	192
17	24	chr13	48892341	48895763	RB1	9	195
18	25	chr14	101275427	101278058	G-DMR	0	64
19	26	chr14	101290524	101293978	MEG3	33	188
20	27	chr14	101370741	101371419	MEG8	1	43
21	28	chr15	23807086	23812495	MKRN3	13	109
22	29	chr15	23892425	23894029	MAGEL2	6	51
23	3	chr1	68512505	68513486	DIRAS3_Ex2	8	39
24	30	chr15	23931451	23932759	NDN	6	108
25	31	chr15	24346736	24347142	SNRPN_5'DMR1	0	30
26	32	chr15	24671872	24672679	SNRPN_5'DMR2	3	39
27	33	chr15	24722753	24723071	SNRPN_5'DMR3	0	29
28	34	chr15	25017924	25018886	SNRPN_5'DMR4	4	67
29	35	chr15	25068564	25069481	SNRPN_variant4	9	19
30	36	chr15	25093008	25093829	SNRPN_Int1_DMR1	4	44
31	37	chr15	25123027	25123905	SNRPN_Int1_DMR2	5	45
32	38	chr15	25200004	25201976	SNRPN/SNURF	7	113
33	39	chr15	99408496	99409650	IGF1R	7	55
34	4	chr2	207066967	207069445	GPR1-AS	3	86
35	40	chr16	3481801	3482388	ZNF597	2	29
36	41	chr16	3492828	3494463	ZNF597	12	76
37	42	chr19	54040510	54042212	ZNF331_variants_4-6	10	125
38	43	chr19	54057086	54058425	ZNF331_variant_7	4	102
39	44	chr19	57348493	57353271	PEG3	36	221
40	45	chr20	30134663	30135933	MCTS2P	10	47
41	46	chr20	36148604	36150528	NNAT	36	135
42	47	chr20	42142365	42144040	L3MBTL1	26	84
43	48	chr20	57414039	57418612	GNAS-NESP	23	257
44	49	chr20	57425649	57428033	GNAS-AS1	64	128
45	5	chr2	207114583	207136544	ZDBF2	8	439
46	50	chr20	57428905	57431463	GNAS-XL	6	200
47	51	chr20	57463265	57465201	GNAS-A/B	40	198
48	52	chr21	40757510	40758276	WRB	4	43
49	53	chr22	42077774	42078873	NHP2L1	8	63
50	6	chr4	89618184	89619237	NAP1L5	15	57
51	7	chr5	135414802	135416645	VTRNA2-1	20	76
52	8	chr6	3849082	3850359	FAM50B	25	90
53	9	chr6	144328078	144329888	PLAGL1	16	143
