# Supplementary material for: Genome-wide methylation profiling of Beckwith-Wiedemann syndrome patients without molecular confirmation after routine diagnostics
Source: Clin Epigenetics. 2019 Mar 21;11:53. doi: 10.1186/s13148-019-0649-6 (PMC6429826; doi:10.1186/s13148-019-0649-6)
Supplement: Supplementary file 8 — Table S7. Significant hypermethylated DMPs within the COST regions (per patient). BWS patients that did not display aberrant methylation in imprinted COST regions are not included in this table. (XLSX 38 kb) [file 13148_2019_649_MOESM8_ESM.xlsx]

## Sheet: hyper_BWS10
X

## Sheet: hyper_BWS11
X

## Sheet: hyper_BWS17
X

## Sheet: hyper_BWS18
X

## Sheet: hyper_BWS1
X

## Sheet: hyper_BWS22
X

## Sheet: hyper_BWS24
X

## Sheet: hyper_BWS25
X

## Sheet: hyper_BWS3
X

## Sheet: hyper_BWS4
X

[truncated: 9 more sheets: hyper_BWS5, hyper_BWS7, hyper_BWS8, hyper_BWS9, hyper_MLID BWS1, hyper_MLID BWS2, hyper_MLID BWS3, hyper_MLID BWS4, hyper_MLID BWS5]
