# Supplementary material for: Genome-wide methylation profiling of Beckwith-Wiedemann syndrome patients without molecular confirmation after routine diagnostics
Source: Clin Epigenetics. 2019 Mar 21;11:53. doi: 10.1186/s13148-019-0649-6 (PMC6429826; doi:10.1186/s13148-019-0649-6)
Supplement: Supplementary file 9 — Table S8. Significant hypomethylated DMPs overlapped with COST regions. BWS patients that did not display aberrant methylation in imprinted COST regions are not included in this table. (XLSX 98 kb) [file 13148_2019_649_MOESM9_ESM.xlsx]

## Sheet: hypo_BWS12
X	Chr	start	End	Gena_Nam	regionID	Pvalue_M	AdjustedPvalue_M	Betadif	chr	pos	Genename	Index	direction	significance
43	19	54040510	54042212	ZNF331_variants_4-6	114291	0	0	-0.52954	19	54040818	ZNF331;ZNF331	222985	minus	S

## Sheet: hypo_BWS16
X	Chr	start	End	Gena_Nam	regionID	Pvalue_M	AdjustedPvalue_M	Betadif	chr	pos	Genename	Index	direction	significance
37	15	25093008	25093829	SNRPN_Int1_DMR1	94629	2.68292e-06	0.00349117	-0.223022	15	25093366	SNRPN;SNRPN;SNRPN	138618	minus	S

## Sheet: hypo_BWS23
X	Chr	start	End	Gena_Nam	regionID	Pvalue_M	AdjustedPvalue_M	Betadif	chr	pos	Genename	Index	direction	significance
18	9	98075400	98075744	FANCC	64993	1.44651e-05	0.0156506	-0.240772	9	98075481	FANCC	422709	minus	S
20	11	2018812	2024740	H19	73710	1.8526e-05	0.0193127	-0.089969	11	2019732	H19	66958	minus	S

## Sheet: hypo_BWS24
X	Chr	start	End	Gena_Nam	regionID	Pvalue_M	AdjustedPvalue_M	Betadif	chr	pos	Genename	Index	direction	significance
5	2	207114583	207136544	ZDBF2	20303	2.41228e-09	3.36663e-06	-0.259295	2	207129158		249884	minus	S

## Sheet: hypo_BWS4
X	Chr	start	End	Gena_Nam	regionID	Pvalue_M	AdjustedPvalue_M	Betadif	chr	pos	Genename	Index	direction	significance
24	11	2719948	2722259	KCNQ1OT1	73788	4.8971e-11	2.05705e-07	-0.374864	11	2722082	KCNQ1OT1;KCNQ1;KCNQ1	67781	minus	S
24.1	11	2719948	2722259	KCNQ1OT1	73788	1.29008e-13	1.02536e-09	-0.45393	11	2722084	KCNQ1OT1;KCNQ1;KCNQ1	67782	minus	S

## Sheet: hypo_BWS5
X	Chr	start	End	Gena_Nam	regionID	Pvalue_M	AdjustedPvalue_M	Betadif	chr	pos	Genename	Index	direction	significance
13	7	94285537	94287960	PEG10	54647	5.12868e-08	8.7532e-05	-0.219173	7	94286261	SGCE;PEG10;SGCE;PEG10;SGCE	388718	minus	S
13.1	7	94285537	94287960	PEG10	54647	1.05619e-07	0.000165762	-0.125202	7	94286263	SGCE;PEG10;SGCE;PEG10;SGCE	388719	minus	S

## Sheet: hypo_BWS7
X	Chr	start	End	Gena_Nam	regionID	Pvalue_M	AdjustedPvalue_M	Betadif	chr	pos	Genename	Index	direction	significance
18	9	98075400	98075744	FANCC	64993	0.000118535	0.0344552	-0.216169	9	98075481	FANCC	422710	minus	S
40	15	99408496	99409650	IGF1R	98726	0.000174489	0.0425019	-0.272918	15	99408636	IGF1R	151197	minus	S
40.1	15	99408496	99409650	IGF1R	98726	0.000125174	0.035442	-0.213871	15	99408804	IGF1R	151198	minus	S
40.2	15	99408496	99409650	IGF1R	98726	0.000198421	0.046279	-0.178182	15	99409411	IGF1R	151202	minus	S
48	20	42142365	42144040	L3MBTL1	115833	6.62188e-05	0.0241052	-0.0958069	20	42142417	L3MBTL;L3MBTL	262292	minus	S
48.1	20	42142365	42144040	L3MBTL1	115833	3.00248e-08	5.29395e-05	-0.155354	20	42142451	L3MBTL;L3MBTL	262293	minus	S
48.2	20	42142365	42144040	L3MBTL1	115833	0.000155617	0.0402379	-0.0932667	20	42142484	L3MBTL;L3MBTL	262294	minus	S
48.3	20	42142365	42144040	L3MBTL1	115833	2.60424e-08	4.70302e-05	-0.117569	20	42142494	L3MBTL;L3MBTL	262295	minus	S
48.4	20	42142365	42144040	L3MBTL1	115833	9.33394e-10	2.40915e-06	-0.180371	20	42142559	L3MBTL;L3MBTL	262296	minus	S
48.5	20	42142365	42144040	L3MBTL1	115833	6.68095e-08	0.000105239	-0.137705	20	42142596	L3MBTL;L3MBTL	262297	minus	S
48.6	20	42142365	42144040	L3MBTL1	115833	2.23736e-07	0.000290189	-0.173033	20	42142671	L3MBTL;L3MBTL	262298	minus	S
48.7	20	42142365	42144040	L3MBTL1	115833	1.55854e-10	4.76974e-07	-0.249458	20	42142673	L3MBTL;L3MBTL	262299	minus	S
48.8	20	42142365	42144040	L3MBTL1	115833	1.01366e-08	2.0107e-05	-0.15876	20	42142699	L3MBTL;L3MBTL	262300	minus	S
48.9	20	42142365	42144040	L3MBTL1	115833	3.53813e-10	1.00393e-06	-0.223888	20	42142751	L3MBTL;L3MBTL	262301	minus	S
48.1	20	42142365	42144040	L3MBTL1	115833	6.27054e-13	3.73146e-09	-0.24457	20	42142766	L3MBTL;L3MBTL	262302	minus	S
48.11	20	42142365	42144040	L3MBTL1	115833	6.0731e-11	1.9863e-07	-0.267083	20	42142847	L3MBTL;L3MBTL	262304	minus	S
48.12	20	42142365	42144040	L3MBTL1	115833	7.04758e-10	1.86394e-06	-0.302704	20	42142852	L3MBTL;L3MBTL	262305	minus	S
48.13	20	42142365	42144040	L3MBTL1	115833	2.82059e-09	6.3976e-06	-0.270194	20	42142897	L3MBTL;L3MBTL	262306	minus	S
48.14	20	42142365	42144040	L3MBTL1	115833	1.17507e-06	0.00118184	-0.31869	20	42142947	L3MBTL;L3MBTL	262307	minus	S
48.15	20	42142365	42144040	L3MBTL1	115833	2.32191e-07	0.000296966	-0.353499	20	42142995	L3MBTL;L3MBTL	262308	minus	S
48.16	20	42142365	42144040	L3MBTL1	115833	4.64172e-05	0.0189587	-0.285079	20	42143015	L3MBTL;L3MBTL	262309	minus	S
48.17	20	42142365	42144040	L3MBTL1	115833	4.27807e-05	0.0180766	-0.255877	20	42143045	L3MBTL;L3MBTL	262310	minus	S
48.18	20	42142365	42144040	L3MBTL1	115833	2.23719e-09	5.29578e-06	-0.322063	20	42143080	L3MBTL;L3MBTL;L3MBTL;L3MBTL	262311	minus	S
48.19	20	42142365	42144040	L3MBTL1	115833	3.29826e-07	0.000401465	-0.329878	20	42143096	L3MBTL;L3MBTL;L3MBTL;L3MBTL	262312	minus	S
48.2	20	42142365	42144040	L3MBTL1	115833	1.20409e-10	3.76568e-07	-0.336958	20	42143174	L3MBTL;L3MBTL;L3MBTL;L3MBTL	262313	minus	S
48.21	20	42142365	42144040	L3MBTL1	115833	2.61244e-08	4.70302e-05	-0.119762	20	42143211	L3MBTL;L3MBTL	262314	minus	S
48.22	20	42142365	42144040	L3MBTL1	115833	1.67338e-09	4.09696e-06	-0.316682	20	42143399	L3MBTL;L3MBTL	262315	minus	S
48.23	20	42142365	42144040	L3MBTL1	115833	2.53707e-10	7.29546e-07	-0.206126	20	42143502	L3MBTL;L3MBTL	262317	minus	S
54	22	42077774	42078873	NHP2L1	118683	2.14295e-12	9.8727e-09	-0.220601	22	42078217	NHP2L1;NHP2L1	275645	minus	S
54.1	22	42077774	42078873	NHP2L1	118683	3.4033e-11	1.17594e-07	-0.234974	22	42078330	NHP2L1;NHP2L1	275646	minus	S
54.2	22	42077774	42078873	NHP2L1	118683	2.3603e-09	5.52167e-06	-0.206222	22	42078365	NHP2L1;NHP2L1;NHP2L1	275647	minus	S
54.3	22	42077774	42078873	NHP2L1	118683	4.29204e-08	7.04579e-05	-0.203758	22	42078388	NHP2L1;NHP2L1;NHP2L1	275648	minus	S
54.4	22	42077774	42078873	NHP2L1	118683	5.10643e-10	1.40249e-06	-0.234605	22	42078567	NHP2L1;NHP2L1	275649	minus	S
54.5	22	42077774	42078873	NHP2L1	118683	5.1253e-06	0.00383465	-0.207583	22	42078723	NHP2L1;NHP2L1	275651	minus	S

## Sheet: hypo_MLID BWS1
X	Chr	start	End	Gena_Nam	regionID	Pvalue_M	AdjustedPvalue_M	Betadif	chr	pos	Genename	Index	direction	significance
2	1	68515433	68517545	DIRAS3	4923	4.91223e-09	8.95606e-06	-0.121019	1	68515872	DIRAS3	20346	minus	S
2.1	1	68515433	68517545	DIRAS3	4923	2.92211e-13	1.66933e-09	-0.213806	1	68516080	DIRAS3	20348	minus	S
2.2	1	68515433	68517545	DIRAS3	4923	7.49134e-12	2.54739e-08	-0.280865	1	68516101	DIRAS3	20349	minus	S
2.3	1	68515433	68517545	DIRAS3	4923	1.06295e-10	2.76016e-07	-0.207917	1	68516138	DIRAS3	20350	minus	S
2.4	1	68515433	68517545	DIRAS3	4923	3.26206e-10	7.31753e-07	-0.230337	1	68516272	DIRAS3;DIRAS3	20351	minus	S
2.5	1	68515433	68517545	DIRAS3	4923	1.42109e-14	1.21775e-10	-0.265254	1	68516279	DIRAS3;DIRAS3	20352	minus	S
2.6	1	68515433	68517545	DIRAS3	4923	2.98694e-12	1.13254e-08	-0.218731	1	68516374	DIRAS3;DIRAS3	20353	minus	S
2.7	1	68515433	68517545	DIRAS3	4923	1.08072e-07	0.000140742	-0.223834	1	68516453	DIRAS3;DIRAS3	20354	minus	S
2.8	1	68515433	68517545	DIRAS3	4923	1.51645e-05	0.00867463	-0.267592	1	68516463	DIRAS3	20355	minus	S
2.9	1	68515433	68517545	DIRAS3	4923	3.32889e-12	1.24025e-08	-0.362446	1	68516465	DIRAS3	20356	minus	S
2.1	1	68515433	68517545	DIRAS3	4923	1.68122e-07	0.000199826	-0.230755	1	68516518	DIRAS3	20357	minus	S
2.11	1	68515433	68517545	DIRAS3	4923	1.73275e-06	0.0014557	-0.195031	1	68516627	DIRAS3	20358	minus	S
2.12	1	68515433	68517545	DIRAS3	4923	2.96767e-11	9.01785e-08	-0.385054	1	68517177	DIRAS3	20360	minus	S
2.13	1	68515433	68517545	DIRAS3	4923	1.50865e-07	0.000183113	-0.308619	1	68517205	DIRAS3	20361	minus	S
2.14	1	68515433	68517545	DIRAS3	4923	1.52176e-05	0.00869341	-0.185921	1	68517255	DIRAS3	20362	minus	S
2.15	1	68515433	68517545	DIRAS3	4923	7.50962e-05	0.0270155	-0.298162	1	68517273	DIRAS3	20363	minus	S
3	1	68512505	68513486	DIRAS3_Ex2	4923	2.51424e-06	0.0019912	-0.151135	1	68512539	DIRAS3	20335	minus	S
3.1	1	68512505	68513486	DIRAS3_Ex2	4923	1.01785e-08	1.69691e-05	-0.263299	1	68512777	DIRAS3	20337	minus	S
3.2	1	68512505	68513486	DIRAS3_Ex2	4923	1.95148e-06	0.00161103	-0.272549	1	68512807	DIRAS3	20338	minus	S
3.3	1	68512505	68513486	DIRAS3_Ex2	4923	1.11453e-06	0.000994851	-0.158146	1	68512845	DIRAS3	20339	minus	S
3.4	1	68512505	68513486	DIRAS3_Ex2	4923	1.12683e-06	0.00100165	-0.337347	1	68512928	DIRAS3	20340	minus	S
3.5	1	68512505	68513486	DIRAS3_Ex2	4923	6.47513e-07	0.000629095	-0.249337	1	68512971	DIRAS3	20341	minus	S
3.6	1	68512505	68513486	DIRAS3_Ex2	4923	2.23702e-07	0.000254235	-0.197443	1	68513063	DIRAS3	20342	minus	S
14	7	130130122	130134388	MEST	56239	6.00348e-06	0.00412216	-0.155537	7	130130740	MESTIT1;MEST;MEST;MEST	394130	minus	S
14.1	7	130130122	130134388	MEST	56239	3.67331e-06	0.00273713	-0.190097	7	130130753	MESTIT1;MEST;MEST;MEST	394132	minus	S
14.2	7	130130122	130134388	MEST	56239	2.9045e-05	0.0139826	-0.125051	7	130130995	MESTIT1;MEST;MEST;MEST	394134	minus	S
14.3	7	130130122	130134388	MEST	56239	9.21988e-07	0.000849529	-0.100604	7	130131085	MESTIT1;MEST;MEST;MEST	394135	minus	S
14.4	7	130130122	130134388	MEST	56239	9.58263e-05	0.0319264	-0.109297	7	130131136	MESTIT1;MEST;MEST;MEST	394136	minus	S
14.5	7	130130122	130134388	MEST	56239	3.79601e-05	0.0170663	-0.089976	7	130131146	MESTIT1;MEST;MEST;MEST	394138	minus	S
14.6	7	130130122	130134388	MEST	56239	6.04508e-05	0.0231876	-0.0917925	7	130131258	MEST;MEST;MEST;MESTIT1;MEST	394140	minus	S
14.7	7	130130122	130134388	MEST	56239	0.00013157	0.0394841	-0.102175	7	130131268	MEST;MEST;MEST;MESTIT1;MEST	394141	minus	S
14.8	7	130130122	130134388	MEST	56239	2.2721e-05	0.0116275	-0.128055	7	130131359	MEST;MEST;MEST;MESTIT1	394142	minus	S
14.9	7	130130122	130134388	MEST	56239	2.80456e-06	0.00217528	-0.109706	7	130131367	MEST;MEST;MEST;MESTIT1	394143	minus	S
14.1	7	130130122	130134388	MEST	56239	3.13449e-06	0.00238542	-0.201441	7	130131566	MEST;MEST;MEST;MESTIT1	394147	minus	S
14.11	7	130130122	130134388	MEST	56239	9.01724e-05	0.0305565	-0.146515	7	130131633	MEST;MEST;MEST;MESTIT1	394148	minus	S
14.12	7	130130122	130134388	MEST	56239	7.67311e-05	0.0274158	-0.253463	7	130131691	MEST;MEST;MEST;MESTIT1	394150	minus	S
14.13	7	130130122	130134388	MEST	56239	8.40108e-06	0.00545378	-0.178678	7	130131826	MEST;MEST;MEST;MESTIT1	394154	minus	S
14.14	7	130130122	130134388	MEST	56239	3.27041e-05	0.015314	-0.227046	7	130131829	MEST;MEST;MEST;MESTIT1	394155	minus	S
14.15	7	130130122	130134388	MEST	56239	1.68365e-07	0.000199826	-0.166859	7	130131869	MEST;MEST;MEST;MESTIT1	394156	minus	S
14.16	7	130130122	130134388	MEST	56239	1.5811e-05	0.00896071	-0.11169	7	130131885	MEST;MEST;MEST;MESTIT1	394157	minus	S
14.17	7	130130122	130134388	MEST	56239	1.32251e-05	0.0077304	-0.121375	7	130131887	MEST;MEST;MEST;MESTIT1	394158	minus	S
14.18	7	130130122	130134388	MEST	56239	5.85909e-07	0.000577095	-0.163296	7	130131905	MEST;MEST;MEST;MESTIT1	394159	minus	S
14.19	7	130130122	130134388	MEST	56239	1.6113e-08	2.51745e-05	-0.13305	7	130132199	MEST;MEST;MESTIT1;MEST	394163	minus	S
24	11	2719948	2722259	KCNQ1OT1	73788	1.73195e-14	1.45503e-10	-0.500399	11	2720229	KCNQ1;KCNQ1OT1;KCNQ1	67754	minus	S
24.1	11	2719948	2722259	KCNQ1OT1	73788	1.61635e-08	2.51745e-05	-0.308837	11	2720810	KCNQ1;KCNQ1OT1;KCNQ1	67756	minus	S
24.2	11	2719948	2722259	KCNQ1OT1	73788	1.77906e-10	4.38075e-07	-0.237109	11	2721207	KCNQ1;KCNQ1OT1;KCNQ1	67757	minus	S
24.3	11	2719948	2722259	KCNQ1OT1	73788	2.02038e-12	8.16647e-09	-0.134319	11	2721243	KCNQ1OT1;KCNQ1;KCNQ1	67758	minus	S
24.4	11	2719948	2722259	KCNQ1OT1	73788	7.01217e-13	3.57667e-09	-0.194565	11	2721248	KCNQ1OT1;KCNQ1;KCNQ1	67759	minus	S
24.5	11	2719948	2722259	KCNQ1OT1	73788	2.04281e-14	1.65142e-10	-0.35554	11	2721336	KCNQ1OT1;KCNQ1;KCNQ1	67760	minus	S
24.6	11	2719948	2722259	KCNQ1OT1	73788	1.24968e-09	2.56187e-06	-0.132398	11	2721351	KCNQ1OT1;KCNQ1;KCNQ1	67761	minus	S
24.7	11	2719948	2722259	KCNQ1OT1	73788	2.66454e-15	2.71818e-11	-0.382718	11	2721366	KCNQ1OT1;KCNQ1;KCNQ1	67762	minus	S
24.8	11	2719948	2722259	KCNQ1OT1	73788	1.33227e-15	1.42705e-11	-0.390371	11	2721383	KCNQ1OT1;KCNQ1;KCNQ1	67763	minus	S
24.9	11	2719948	2722259	KCNQ1OT1	73788	2.69845e-10	6.38766e-07	-0.303771	11	2721409	KCNQ1OT1;KCNQ1;KCNQ1	67764	minus	S
24.1	11	2719948	2722259	KCNQ1OT1	73788	1.31006e-13	8.50461e-10	-0.332267	11	2721428	KCNQ1OT1;KCNQ1;KCNQ1	67765	minus	S
24.11	11	2719948	2722259	KCNQ1OT1	73788	3.86358e-13	2.14983e-09	-0.189158	11	2721437	KCNQ1OT1;KCNQ1;KCNQ1	67766	minus	S
24.12	11	2719948	2722259	KCNQ1OT1	73788	9.63576e-11	2.54846e-07	-0.231782	11	2721480	KCNQ1OT1;KCNQ1;KCNQ1	67767	minus	S
24.13	11	2719948	2722259	KCNQ1OT1	73788	3.82176e-05	0.0171282	-0.121409	11	2721610	KCNQ1OT1;KCNQ1;KCNQ1	67769	minus	S
24.14	11	2719948	2722259	KCNQ1OT1	73788	4.18926e-10	9.15773e-07	-0.149698	11	2721619	KCNQ1OT1;KCNQ1;KCNQ1	67770	minus	S
24.15	11	2719948	2722259	KCNQ1OT1	73788	3.42246e-11	1.01832e-07	-0.228659	11	2721632	KCNQ1OT1;KCNQ1;KCNQ1	67771	minus	S
24.16	11	2719948	2722259	KCNQ1OT1	73788	3.24915e-07	0.000350659	-0.19308	11	2721799	KCNQ1OT1;KCNQ1;KCNQ1	67772	minus	S
24.17	11	2719948	2722259	KCNQ1OT1	73788	2.38858e-11	7.36259e-08	-0.267772	11	2721817	KCNQ1OT1;KCNQ1;KCNQ1	67773	minus	S
24.18	11	2719948	2722259	KCNQ1OT1	73788	3.25834e-10	7.31753e-07	-0.276007	11	2721857	KCNQ1OT1;KCNQ1;KCNQ1	67774	minus	S
24.19	11	2719948	2722259	KCNQ1OT1	73788	2.42291e-10	5.83208e-07	-0.189094	11	2721952	KCNQ1OT1;KCNQ1;KCNQ1	67776	minus	S
24.2	11	2719948	2722259	KCNQ1OT1	73788	1.62537e-13	1.00927e-09	-0.174185	11	2721961	KCNQ1OT1;KCNQ1;KCNQ1	67777	minus	S
24.21	11	2719948	2722259	KCNQ1OT1	73788	8.15348e-13	4.0621e-09	-0.310969	11	2722062	KCNQ1OT1;KCNQ1;KCNQ1	67778	minus	S
24.22	11	2719948	2722259	KCNQ1OT1	73788	1.03104e-10	2.69363e-07	-0.252187	11	2722073	KCNQ1OT1;KCNQ1;KCNQ1	67779	minus	S
24.23	11	2719948	2722259	KCNQ1OT1	73788	5.19318e-12	1.82381e-08	-0.31942	11	2722076	KCNQ1OT1;KCNQ1;KCNQ1	67780	minus	S
24.24	11	2719948	2722259	KCNQ1OT1	73788	8.41468e-10	1.75869e-06	-0.321381	11	2722082	KCNQ1OT1;KCNQ1;KCNQ1	67781	minus	S
24.25	11	2719948	2722259	KCNQ1OT1	73788	1.4556e-07	0.0001787	-0.299347	11	2722084	KCNQ1OT1;KCNQ1;KCNQ1	67782	minus	S
24.26	11	2719948	2722259	KCNQ1OT1	73788	1.73794e-08	2.65939e-05	-0.319863	11	2722086	KCNQ1OT1;KCNQ1;KCNQ1	67783	minus	S
24.27	11	2719948	2722259	KCNQ1OT1	73788	6.75353e-07	0.00065171	-0.187542	11	2722195	KCNQ1OT1;KCNQ1;KCNQ1	67784	minus	S
25	13	48892341	48895763	RB1	88491	1.54582e-05	0.00880742	-0.145324	13	48893174	RB1	117728	minus	S
25.1	13	48892341	48895763	RB1	88491	8.28961e-05	0.0289041	-0.139597	13	48893727	RB1	117729	minus	S
30	15	23892425	23894029	MAGEL2	94607	0.000169817	0.0462243	-0.141561	15	23893025	MAGEL2	138535	minus	S
30.1	15	23892425	23894029	MAGEL2	94607	3.09717e-05	0.0146955	-0.140896	15	23893040	MAGEL2	138536	minus	S
47	20	36148604	36150528	NNAT	115719	3.16081e-08	4.62208e-05	-0.288158	20	36150061	BLCAP;BLCAP;BLCAP;NNAT;BLCAP;BLCAP;NNAT	261710	minus	S
48	20	42142365	42144040	L3MBTL1	115833	4.38861e-10	9.54266e-07	-0.191978	20	42142451	L3MBTL;L3MBTL	262293	minus	S
48.1	20	42142365	42144040	L3MBTL1	115833	1.60061e-08	2.51206e-05	-0.122622	20	42142494	L3MBTL;L3MBTL	262295	minus	S
48.2	20	42142365	42144040	L3MBTL1	115833	1.38831e-09	2.83253e-06	-0.177013	20	42142559	L3MBTL;L3MBTL	262296	minus	S
48.3	20	42142365	42144040	L3MBTL1	115833	4.90437e-09	8.95606e-06	-0.155556	20	42142596	L3MBTL;L3MBTL	262297	minus	S
48.4	20	42142365	42144040	L3MBTL1	115833	1.11653e-07	0.000144504	-0.173696	20	42142671	L3MBTL;L3MBTL	262298	minus	S
48.5	20	42142365	42144040	L3MBTL1	115833	7.55866e-09	1.32728e-05	-0.203639	20	42142673	L3MBTL;L3MBTL	262299	minus	S
48.6	20	42142365	42144040	L3MBTL1	115833	4.8869e-09	8.95606e-06	-0.161419	20	42142699	L3MBTL;L3MBTL	262300	minus	S
48.7	20	42142365	42144040	L3MBTL1	115833	3.43588e-10	7.62759e-07	-0.216212	20	42142751	L3MBTL;L3MBTL	262301	minus	S
48.8	20	42142365	42144040	L3MBTL1	115833	1.05915e-12	4.98682e-09	-0.240077	20	42142766	L3MBTL;L3MBTL	262302	minus	S
48.9	20	42142365	42144040	L3MBTL1	115833	7.02117e-10	1.4819e-06	-0.244441	20	42142847	L3MBTL;L3MBTL	262304	minus	S
48.1	20	42142365	42144040	L3MBTL1	115833	5.99491e-10	1.27789e-06	-0.295793	20	42142852	L3MBTL;L3MBTL	262305	minus	S
48.11	20	42142365	42144040	L3MBTL1	115833	4.13995e-10	9.09633e-07	-0.285189	20	42142897	L3MBTL;L3MBTL	262306	minus	S
48.12	20	42142365	42144040	L3MBTL1	115833	1.20802e-06	0.00106062	-0.317039	20	42142947	L3MBTL;L3MBTL	262307	minus	S
48.13	20	42142365	42144040	L3MBTL1	115833	2.23662e-06	0.00180356	-0.311398	20	42142995	L3MBTL;L3MBTL	262308	minus	S
48.14	20	42142365	42144040	L3MBTL1	115833	7.28305e-07	0.000693096	-0.36202	20	42143015	L3MBTL;L3MBTL	262309	minus	S
48.15	20	42142365	42144040	L3MBTL1	115833	9.53366e-09	1.60186e-05	-0.298469	20	42143080	L3MBTL;L3MBTL;L3MBTL;L3MBTL	262311	minus	S
48.16	20	42142365	42144040	L3MBTL1	115833	7.12203e-06	0.00474633	-0.277286	20	42143096	L3MBTL;L3MBTL;L3MBTL;L3MBTL	262312	minus	S
48.17	20	42142365	42144040	L3MBTL1	115833	1.0241e-08	1.70071e-05	-0.272674	20	42143174	L3MBTL;L3MBTL;L3MBTL;L3MBTL	262313	minus	S
48.18	20	42142365	42144040	L3MBTL1	115833	3.94138e-08	5.61033e-05	-0.115393	20	42143211	L3MBTL;L3MBTL	262314	minus	S
48.19	20	42142365	42144040	L3MBTL1	115833	9.30041e-08	0.00012261	-0.255393	20	42143399	L3MBTL;L3MBTL	262315	minus	S
48.2	20	42142365	42144040	L3MBTL1	115833	1.81188e-12	7.46454e-09	-0.250621	20	42143502	L3MBTL;L3MBTL	262317	minus	S
50	20	57425649	57428033	GNAS-AS1	116321	1.54555e-07	0.000187062	-0.181585	20	57426538	GNAS;GNAS;GNAS;GNASAS	264652	minus	S
50.1	20	57425649	57428033	GNAS-AS1	116321	0.000145932	0.0418533	-0.20303	20	57426759	GNAS;GNAS;GNAS;GNASAS	264659	minus	S
50.2	20	57425649	57428033	GNAS-AS1	116321	5.05014e-05	0.0203552	-0.0967514	20	57426789	GNAS;GNAS;GNAS;GNASAS	264660	minus	S
50.3	20	57425649	57428033	GNAS-AS1	116321	8.43124e-08	0.000112536	-0.231459	20	57426835	GNAS;GNAS;GNAS;GNASAS	264662	minus	S
50.4	20	57425649	57428033	GNAS-AS1	116321	8.78895e-09	1.51232e-05	-0.230103	20	57426858	GNAS;GNAS;GNAS;GNASAS	264663	minus	S
50.5	20	57425649	57428033	GNAS-AS1	116321	2.55795e-12	9.87361e-09	-0.288116	20	57426931	GNAS;GNAS;GNAS;GNASAS	264664	minus	S
50.6	20	57425649	57428033	GNAS-AS1	116321	4.13447e-13	2.27108e-09	-0.23645	20	57426950	GNAS;GNAS;GNAS;GNASAS	264665	minus	S
50.7	20	57425649	57428033	GNAS-AS1	116321	1.25312e-10	3.23437e-07	-0.192882	20	57426979	GNAS;GNAS;GNAS;GNASAS	264666	minus	S
50.8	20	57425649	57428033	GNAS-AS1	116321	9.3294e-07	0.000857776	-0.0943381	20	57427010	GNAS;GNAS;GNAS;GNASAS	264667	minus	S
50.9	20	57425649	57428033	GNAS-AS1	116321	1.63961e-06	0.00138834	-0.141542	20	57427017	GNAS;GNAS;GNAS;GNASAS	264668	minus	S
50.1	20	57425649	57428033	GNAS-AS1	116321	8.68026e-05	0.0297128	-0.11471	20	57427030	GNAS;GNAS;GNAS;GNASAS	264669	minus	S
50.11	20	57425649	57428033	GNAS-AS1	116321	3.00657e-09	5.69993e-06	-0.204796	20	57427046	GNAS;GNAS;GNAS;GNASAS	264670	minus	S
50.12	20	57425649	57428033	GNAS-AS1	116321	2.14886e-10	5.2312e-07	-0.394405	20	57427103	GNAS;GNAS;GNAS;GNASAS	264671	minus	S
50.13	20	57425649	57428033	GNAS-AS1	116321	2.14049e-09	4.20691e-06	-0.182529	20	57427117	GNAS;GNAS;GNAS;GNASAS	264672	minus	S
50.14	20	57425649	57428033	GNAS-AS1	116321	2.28878e-06	0.00183985	-0.313297	20	57427170	GNAS;GNAS;GNAS;GNASAS	264674	minus	S
50.15	20	57425649	57428033	GNAS-AS1	116321	4.28763e-05	0.0184074	-0.207919	20	57427173	GNAS;GNAS;GNAS;GNASAS	264675	minus	S
50.16	20	57425649	57428033	GNAS-AS1	116321	2.01914e-06	0.00165731	-0.20895	20	57427210	GNAS;GNAS;GNAS;GNASAS	264676	minus	S
50.17	20	57425649	57428033	GNAS-AS1	116321	2.62976e-06	0.00206741	-0.442167	20	57427237	GNAS;GNAS;GNAS;GNASAS	264677	minus	S
50.18	20	57425649	57428033	GNAS-AS1	116321	9.56024e-06	0.00605043	-0.16471	20	57427274	GNAS;GNAS;GNAS;GNASAS	264678	minus	S
50.19	20	57425649	57428033	GNAS-AS1	116321	2.01175e-05	0.0106413	-0.200227	20	57427412	GNAS;GNAS;GNAS;GNASAS	264679	minus	S
50.2	20	57425649	57428033	GNAS-AS1	116321	6.20426e-05	0.0236079	-0.186134	20	57427443	GNAS;GNAS;GNAS;GNASAS	264681	minus	S
50.21	20	57425649	57428033	GNAS-AS1	116321	5.22976e-07	0.000527229	-0.354097	20	57427472	GNAS;GNAS;GNAS	264682	minus	S
50.22	20	57425649	57428033	GNAS-AS1	116321	5.3711e-09	9.66924e-06	-0.336474	20	57427483	GNAS;GNAS;GNAS	264683	minus	S
50.23	20	57425649	57428033	GNAS-AS1	116321	1.55366e-06	0.00132341	-0.247016	20	57427493	GNAS;GNAS;GNAS	264684	minus	S
50.24	20	57425649	57428033	GNAS-AS1	116321	4.97273e-07	0.000507285	-0.200711	20	57427495	GNAS;GNAS;GNAS	264685	minus	S
50.25	20	57425649	57428033	GNAS-AS1	116321	2.11039e-07	0.000242415	-0.233862	20	57427503	GNAS;GNAS;GNAS	264686	minus	S
50.26	20	57425649	57428033	GNAS-AS1	116321	4.63542e-05	0.0192636	-0.267298	20	57427556	GNAS;GNAS;GNAS	264687	minus	S
50.27	20	57425649	57428033	GNAS-AS1	116321	0.000105267	0.034065	-0.198034	20	57427713	GNAS;GNAS;GNAS	264690	minus	S
50.28	20	57425649	57428033	GNAS-AS1	116321	4.54197e-05	0.0190414	-0.189798	20	57427821	GNAS;GNAS;GNAS	264694	minus	S
51	20	57428905	57431463	GNAS-XL	116321	2.16605e-12	8.67341e-09	-0.377527	20	57429277	GNAS;GNAS;GNAS	264705	minus	S
51.1	20	57428905	57431463	GNAS-XL	116321	9.99201e-14	6.79545e-10	-0.254042	20	57429858	GNAS;GNAS;GNAS	264706	minus	S
51.2	20	57428905	57431463	GNAS-XL	116321	2.65991e-07	0.000294485	-0.177431	20	57430313	GNAS;GNAS;GNAS	264707	minus	S
51.3	20	57428905	57431463	GNAS-XL	116321	4.95728e-11	1.43512e-07	-0.204741	20	57430663	GNAS;GNAS;GNAS	264708	minus	S
51.4	20	57428905	57431463	GNAS-XL	116321	1.67523e-10	4.14892e-07	-0.199402	20	57431303	GNAS;GNAS;GNAS	264710	minus	S
52	20	57463265	57465201	GNAS-A/B	116325	1.8458e-05	0.0100029	-0.0963267	20	57463397	GNAS;GNAS;GNAS;GNAS	264725	minus	S
52.1	20	57463265	57465201	GNAS-A/B	116325	9.46084e-05	0.031619	-0.13449	20	57463658	GNAS;GNAS;GNAS;GNAS	264733	minus	S
52.2	20	57463265	57465201	GNAS-A/B	116325	0.000132723	0.0396556	-0.05796	20	57463775	GNAS;GNAS;GNAS;GNAS	264739	minus	S
52.3	20	57463265	57465201	GNAS-A/B	116325	0.000100898	0.033076	-0.187402	20	57465175	GNAS;GNAS;GNAS;GNAS;GNAS;GNAS;GNAS	264758	minus	S

## Sheet: hypo_MLID BWS2
X	Chr	start	End	Gena_Nam	regionID	Pvalue_M	AdjustedPvalue_M	Betadif	chr	pos	Genename	Index	direction	significance
2	1	68515433	68517545	DIRAS3	4923	1.75164e-05	0.00650346	-0.222952	1	68517177	DIRAS3	20360	minus	S
2.1	1	68515433	68517545	DIRAS3	4923	8.10427e-09	1.01234e-05	-0.338599	1	68517205	DIRAS3	20361	minus	S
2.2	1	68515433	68517545	DIRAS3	4923	0.000134917	0.0279931	-0.159614	1	68517255	DIRAS3	20362	minus	S
2.3	1	68515433	68517545	DIRAS3	4923	1.35256e-05	0.00529717	-0.326415	1	68517273	DIRAS3	20363	minus	S
3	1	68512505	68513486	DIRAS3_Ex2	4923	6.64315e-05	0.0172201	-0.125364	1	68512539	DIRAS3	20335	minus	S
3.1	1	68512505	68513486	DIRAS3_Ex2	4923	1.16975e-06	0.00077045	-0.213566	1	68512777	DIRAS3	20337	minus	S
3.2	1	68512505	68513486	DIRAS3_Ex2	4923	7.46664e-05	0.0185525	-0.119481	1	68512845	DIRAS3	20339	minus	S
3.3	1	68512505	68513486	DIRAS3_Ex2	4923	0.000176657	0.0333435	-0.131481	1	68513063	DIRAS3	20342	minus	S
8	6	3849082	3850359	FAM50B	43448	6.23538e-06	0.00296185	-0.349956	6	3849190	FAM50B	342723	minus	S
8.1	6	3849082	3850359	FAM50B	43448	1.43043e-07	0.000128217	-0.132162	6	3849235	FAM50B	342724	minus	S
8.2	6	3849082	3850359	FAM50B	43448	2.56951e-06	0.00147973	-0.154993	6	3849272	FAM50B	342725	minus	S
8.3	6	3849082	3850359	FAM50B	43448	0.000137031	0.0283085	-0.0950096	6	3849277	FAM50B	342726	minus	S
8.4	6	3849082	3850359	FAM50B	43448	2.669e-07	0.000222914	-0.169297	6	3849294	FAM50B	342727	minus	S
8.5	6	3849082	3850359	FAM50B	43448	4.85111e-06	0.00243954	-0.128757	6	3849350	FAM50B	342730	minus	S
8.6	6	3849082	3850359	FAM50B	43448	4.7486e-11	9.78157e-08	-0.189644	6	3849381	FAM50B	342731	minus	S
8.7	6	3849082	3850359	FAM50B	43448	1.42034e-05	0.00548245	-0.155586	6	3849391	FAM50B	342732	minus	S
8.8	6	3849082	3850359	FAM50B	43448	1.19339e-08	1.44033e-05	-0.205134	6	3849411	FAM50B	342733	minus	S
8.9	6	3849082	3850359	FAM50B	43448	3.82116e-07	0.000302066	-0.160408	6	3849434	FAM50B	342734	minus	S
8.1	6	3849082	3850359	FAM50B	43448	1.13764e-06	0.000754533	-0.177628	6	3849442	FAM50B	342735	minus	S
8.11	6	3849082	3850359	FAM50B	43448	2.5176e-07	0.000211872	-0.223793	6	3849458	FAM50B	342736	minus	S
8.12	6	3849082	3850359	FAM50B	43448	1.20568e-10	2.25582e-07	-0.220466	6	3849475	FAM50B	342737	minus	S
8.13	6	3849082	3850359	FAM50B	43448	9.03999e-08	8.76298e-05	-0.198976	6	3849536	FAM50B	342738	minus	S
8.14	6	3849082	3850359	FAM50B	43448	1.46673e-06	0.00093239	-0.204611	6	3849542	FAM50B	342739	minus	S
8.15	6	3849082	3850359	FAM50B	43448	1.30762e-06	0.000847588	-0.229373	6	3849577	FAM50B	342740	minus	S
8.16	6	3849082	3850359	FAM50B	43448	1.65893e-06	0.00103311	-0.120715	6	3849702	FAM50B;FAM50B	342743	minus	S
8.17	6	3849082	3850359	FAM50B	43448	6.64951e-05	0.0172201	-0.096659	6	3849801	FAM50B	342744	minus	S
8.18	6	3849082	3850359	FAM50B	43448	9.86458e-05	0.0224936	-0.0896617	6	3849818	FAM50B	342745	minus	S
16	8	37604992	37606088	ERLIN2	59611	1.45052e-05	0.00557884	-0.345301	8	37605717	LOC728024;ERLIN2	406704	minus	S
16.1	8	37604992	37606088	ERLIN2	59611	2.55198e-06	0.00147162	-0.295606	8	37605783	LOC728024;ERLIN2	406705	minus	S
18	9	98075400	98075744	FANCC	64993	2.14362e-12	5.70464e-09	-0.426504	9	98075481	FANCC	422710	minus	S
18.1	9	98075400	98075744	FANCC	64993	1.13906e-08	1.38255e-05	-0.30667	9	98075492	FANCC	422711	minus	S
24	11	2719948	2722259	KCNQ1OT1	73788	1.90958e-13	6.19828e-10	-0.46216	11	2720229	KCNQ1;KCNQ1OT1;KCNQ1	67754	minus	S
24.1	11	2719948	2722259	KCNQ1OT1	73788	8.41896e-08	8.19808e-05	-0.283609	11	2720810	KCNQ1;KCNQ1OT1;KCNQ1	67756	minus	S
24.2	11	2719948	2722259	KCNQ1OT1	73788	2.79186e-11	5.95118e-08	-0.253897	11	2721207	KCNQ1;KCNQ1OT1;KCNQ1	67757	minus	S
24.3	11	2719948	2722259	KCNQ1OT1	73788	4.50529e-13	1.34987e-09	-0.143166	11	2721243	KCNQ1OT1;KCNQ1;KCNQ1	67758	minus	S
24.4	11	2719948	2722259	KCNQ1OT1	73788	7.82263e-13	2.24943e-09	-0.193583	11	2721248	KCNQ1OT1;KCNQ1;KCNQ1	67759	minus	S
24.5	11	2719948	2722259	KCNQ1OT1	73788	3.47056e-13	1.06977e-09	-0.326157	11	2721336	KCNQ1OT1;KCNQ1;KCNQ1	67760	minus	S
24.6	11	2719948	2722259	KCNQ1OT1	73788	1.18005e-09	1.83854e-06	-0.13344	11	2721351	KCNQ1OT1;KCNQ1;KCNQ1	67761	minus	S
24.7	11	2719948	2722259	KCNQ1OT1	73788	3.73035e-14	1.53682e-10	-0.353577	11	2721366	KCNQ1OT1;KCNQ1;KCNQ1	67762	minus	S
24.8	11	2719948	2722259	KCNQ1OT1	73788	2.22045e-15	1.23554e-11	-0.384022	11	2721383	KCNQ1OT1;KCNQ1;KCNQ1	67763	minus	S
24.9	11	2719948	2722259	KCNQ1OT1	73788	8.5405e-11	1.67855e-07	-0.315565	11	2721409	KCNQ1OT1;KCNQ1;KCNQ1	67764	minus	S
24.1	11	2719948	2722259	KCNQ1OT1	73788	4.52487e-11	9.36574e-08	-0.270911	11	2721428	KCNQ1OT1;KCNQ1;KCNQ1	67765	minus	S
24.11	11	2719948	2722259	KCNQ1OT1	73788	1.31939e-12	3.71908e-09	-0.179719	11	2721437	KCNQ1OT1;KCNQ1;KCNQ1	67766	minus	S
24.12	11	2719948	2722259	KCNQ1OT1	73788	1.30083e-09	1.99054e-06	-0.209828	11	2721480	KCNQ1OT1;KCNQ1;KCNQ1	67767	minus	S
24.13	11	2719948	2722259	KCNQ1OT1	73788	4.03977e-06	0.00211081	-0.1411	11	2721610	KCNQ1OT1;KCNQ1;KCNQ1	67769	minus	S
24.14	11	2719948	2722259	KCNQ1OT1	73788	7.48379e-08	7.32071e-05	-0.11469	11	2721619	KCNQ1OT1;KCNQ1;KCNQ1	67770	minus	S
24.15	11	2719948	2722259	KCNQ1OT1	73788	7.13357e-10	1.14473e-06	-0.196979	11	2721632	KCNQ1OT1;KCNQ1;KCNQ1	67771	minus	S
24.16	11	2719948	2722259	KCNQ1OT1	73788	7.6219e-09	9.60484e-06	-0.233257	11	2721799	KCNQ1OT1;KCNQ1;KCNQ1	67772	minus	S
24.17	11	2719948	2722259	KCNQ1OT1	73788	8.05662e-11	1.59074e-07	-0.252768	11	2721817	KCNQ1OT1;KCNQ1;KCNQ1	67773	minus	S
24.18	11	2719948	2722259	KCNQ1OT1	73788	3.13962e-09	4.32536e-06	-0.249375	11	2721857	KCNQ1OT1;KCNQ1;KCNQ1	67774	minus	S
24.19	11	2719948	2722259	KCNQ1OT1	73788	2.25066e-09	3.21437e-06	-0.171483	11	2721952	KCNQ1OT1;KCNQ1;KCNQ1	67776	minus	S
24.2	11	2719948	2722259	KCNQ1OT1	73788	5.87974e-13	1.71375e-09	-0.164763	11	2721961	KCNQ1OT1;KCNQ1;KCNQ1	67777	minus	S
24.21	11	2719948	2722259	KCNQ1OT1	73788	7.10543e-15	3.42063e-11	-0.349361	11	2722062	KCNQ1OT1;KCNQ1;KCNQ1	67778	minus	S
24.22	11	2719948	2722259	KCNQ1OT1	73788	6.02318e-12	1.4102e-08	-0.279613	11	2722073	KCNQ1OT1;KCNQ1;KCNQ1	67779	minus	S
24.23	11	2719948	2722259	KCNQ1OT1	73788	1.09734e-12	3.11367e-09	-0.333592	11	2722076	KCNQ1OT1;KCNQ1;KCNQ1	67780	minus	S
24.24	11	2719948	2722259	KCNQ1OT1	73788	1.72074e-10	3.07193e-07	-0.340488	11	2722082	KCNQ1OT1;KCNQ1;KCNQ1	67781	minus	S
24.25	11	2719948	2722259	KCNQ1OT1	73788	1.60741e-08	1.89726e-05	-0.327377	11	2722084	KCNQ1OT1;KCNQ1;KCNQ1	67782	minus	S
24.26	11	2719948	2722259	KCNQ1OT1	73788	4.23352e-09	5.67244e-06	-0.337235	11	2722086	KCNQ1OT1;KCNQ1;KCNQ1	67783	minus	S
24.27	11	2719948	2722259	KCNQ1OT1	73788	4.4526e-10	7.36581e-07	-0.267836	11	2722195	KCNQ1OT1;KCNQ1;KCNQ1	67784	minus	S
24.28	11	2719948	2722259	KCNQ1OT1	73788	8.49605e-06	0.00375444	-0.277058	11	2722258	KCNQ1OT1;KCNQ1;KCNQ1	67785	minus	S
40	15	99408496	99409650	IGF1R	98726	8.54976e-05	0.0204305	-0.288238	15	99408636	IGF1R	151197	minus	S
50	20	57425649	57428033	GNAS-AS1	116321	1.77278e-08	2.05286e-05	-0.266167	20	57426240	GNAS;GNASAS	264641	minus	S
50.1	20	57425649	57428033	GNAS-AS1	116321	4.67761e-06	0.00236225	-0.119385	20	57426322	GNAS;GNASAS	264644	minus	S
50.2	20	57425649	57428033	GNAS-AS1	116321	0.000253622	0.0422837	-0.139831	20	57426570	GNAS;GNAS;GNAS;GNASAS	264654	minus	S
50.3	20	57425649	57428033	GNAS-AS1	116321	6.97584e-05	0.0177801	-0.0737103	20	57426580	GNAS;GNAS;GNAS;GNASAS	264655	minus	S
50.4	20	57425649	57428033	GNAS-AS1	116321	0.000244107	0.041307	-0.206942	20	57426757	GNAS;GNAS;GNAS;GNASAS	264658	minus	S
50.5	20	57425649	57428033	GNAS-AS1	116321	5.62895e-07	0.00041582	-0.288702	20	57426759	GNAS;GNAS;GNAS;GNASAS	264659	minus	S
50.6	20	57425649	57428033	GNAS-AS1	116321	2.67244e-10	4.59849e-07	-0.187378	20	57426789	GNAS;GNAS;GNAS;GNASAS	264660	minus	S
50.7	20	57425649	57428033	GNAS-AS1	116321	2.73185e-10	4.68191e-07	-0.211313	20	57426801	GNAS;GNAS;GNAS;GNASAS	264661	minus	S
50.8	20	57425649	57428033	GNAS-AS1	116321	3.82139e-13	1.1695e-09	-0.361886	20	57426835	GNAS;GNAS;GNAS;GNASAS	264662	minus	S
50.9	20	57425649	57428033	GNAS-AS1	116321	0	0	-0.412208	20	57426858	GNAS;GNAS;GNAS;GNASAS	264663	minus	S
50.1	20	57425649	57428033	GNAS-AS1	116321	0	0	-0.483844	20	57426931	GNAS;GNAS;GNAS;GNASAS	264664	minus	S
50.11	20	57425649	57428033	GNAS-AS1	116321	0	0	-0.4795	20	57426950	GNAS;GNAS;GNAS;GNASAS	264665	minus	S
50.12	20	57425649	57428033	GNAS-AS1	116321	0	0	-0.392262	20	57426979	GNAS;GNAS;GNAS;GNASAS	264666	minus	S
50.13	20	57425649	57428033	GNAS-AS1	116321	1.33227e-15	7.61091e-12	-0.245752	20	57427010	GNAS;GNAS;GNAS;GNASAS	264667	minus	S
50.14	20	57425649	57428033	GNAS-AS1	116321	0	0	-0.438661	20	57427017	GNAS;GNAS;GNAS;GNASAS	264668	minus	S
50.15	20	57425649	57428033	GNAS-AS1	116321	1.06581e-13	3.74307e-10	-0.306209	20	57427030	GNAS;GNAS;GNAS;GNASAS	264669	minus	S
50.16	20	57425649	57428033	GNAS-AS1	116321	0	0	-0.370917	20	57427046	GNAS;GNAS;GNAS;GNASAS	264670	minus	S
50.17	20	57425649	57428033	GNAS-AS1	116321	2.70894e-14	1.13791e-10	-0.475884	20	57427103	GNAS;GNAS;GNAS;GNASAS	264671	minus	S
50.18	20	57425649	57428033	GNAS-AS1	116321	0	0	-0.313754	20	57427117	GNAS;GNAS;GNAS;GNASAS	264672	minus	S
50.19	20	57425649	57428033	GNAS-AS1	116321	1.5679e-11	3.49884e-08	-0.469465	20	57427170	GNAS;GNAS;GNAS;GNASAS	264674	minus	S
50.2	20	57425649	57428033	GNAS-AS1	116321	2.30851e-07	0.000196639	-0.283351	20	57427173	GNAS;GNAS;GNAS;GNASAS	264675	minus	S
50.21	20	57425649	57428033	GNAS-AS1	116321	1.19701e-10	2.25582e-07	-0.327429	20	57427210	GNAS;GNAS;GNAS;GNASAS	264676	minus	S
50.22	20	57425649	57428033	GNAS-AS1	116321	4.63597e-09	6.14956e-06	-0.589722	20	57427237	GNAS;GNAS;GNAS;GNASAS	264677	minus	S
50.23	20	57425649	57428033	GNAS-AS1	116321	4.32903e-11	9.00387e-08	-0.281798	20	57427274	GNAS;GNAS;GNAS;GNASAS	264678	minus	S
50.24	20	57425649	57428033	GNAS-AS1	116321	1.68874e-11	3.72964e-08	-0.303322	20	57427412	GNAS;GNAS;GNAS;GNASAS	264679	minus	S
50.25	20	57425649	57428033	GNAS-AS1	116321	2.91e-08	3.1485e-05	-0.276712	20	57427426	GNAS;GNAS;GNAS;GNASAS	264680	minus	S
50.26	20	57425649	57428033	GNAS-AS1	116321	2.18312e-11	4.70036e-08	-0.339356	20	57427443	GNAS;GNAS;GNAS;GNASAS	264681	minus	S
50.27	20	57425649	57428033	GNAS-AS1	116321	1.70427e-09	2.52666e-06	-0.388167	20	57427472	GNAS;GNAS;GNAS	264682	minus	S
50.28	20	57425649	57428033	GNAS-AS1	116321	1.88538e-12	5.08052e-09	-0.384946	20	57427483	GNAS;GNAS;GNAS	264683	minus	S
50.29	20	57425649	57428033	GNAS-AS1	116321	4.12275e-11	8.61666e-08	-0.326052	20	57427493	GNAS;GNAS;GNAS	264684	minus	S
50.3	20	57425649	57428033	GNAS-AS1	116321	9.72677e-11	1.87725e-07	-0.282847	20	57427495	GNAS;GNAS;GNAS	264685	minus	S
50.31	20	57425649	57428033	GNAS-AS1	116321	7.03881e-14	2.68571e-10	-0.398742	20	57427503	GNAS;GNAS;GNAS	264686	minus	S
50.32	20	57425649	57428033	GNAS-AS1	116321	5.94503e-08	5.95136e-05	-0.351009	20	57427556	GNAS;GNAS;GNAS	264687	minus	S
50.33	20	57425649	57428033	GNAS-AS1	116321	3.26796e-10	5.5343e-07	-0.331515	20	57427713	GNAS;GNAS;GNAS	264690	minus	S
50.34	20	57425649	57428033	GNAS-AS1	116321	4.09505e-09	5.53486e-06	-0.230838	20	57427730	GNAS;GNAS;GNAS	264691	minus	S
50.35	20	57425649	57428033	GNAS-AS1	116321	2.65663e-08	2.9037e-05	-0.239674	20	57427738	GNAS;GNAS;GNAS	264692	minus	S
50.36	20	57425649	57428033	GNAS-AS1	116321	5.38491e-08	5.45436e-05	-0.220499	20	57427762	GNAS;GNAS;GNAS	264693	minus	S
50.37	20	57425649	57428033	GNAS-AS1	116321	2.22045e-16	1.46364e-12	-0.410083	20	57427821	GNAS;GNAS;GNAS	264694	minus	S
50.38	20	57425649	57428033	GNAS-AS1	116321	1.54703e-11	3.47033e-08	-0.450927	20	57427830	GNAS;GNAS;GNAS	264695	minus	S
50.39	20	57425649	57428033	GNAS-AS1	116321	2.22045e-16	1.46364e-12	-0.45036	20	57427942	GNAS;GNAS;GNAS	264696	minus	S
50.4	20	57425649	57428033	GNAS-AS1	116321	2.44249e-14	1.0465e-10	-0.43923	20	57427973	GNAS;GNAS;GNAS	264697	minus	S
51	20	57428905	57431463	GNAS-XL	116321	0	0	-0.524381	20	57429277	GNAS;GNAS;GNAS	264705	minus	S
51.1	20	57428905	57431463	GNAS-XL	116321	0	0	-0.394723	20	57429858	GNAS;GNAS;GNAS	264706	minus	S
51.2	20	57428905	57431463	GNAS-XL	116321	3.02869e-13	9.47197e-10	-0.316931	20	57430313	GNAS;GNAS;GNAS	264707	minus	S
51.3	20	57428905	57431463	GNAS-XL	116321	0	0	-0.417171	20	57430663	GNAS;GNAS;GNAS	264708	minus	S
51.4	20	57428905	57431463	GNAS-XL	116321	6.1271e-07	0.000442697	-0.331469	20	57431202	GNAS;GNAS;GNAS	264709	minus	S
51.5	20	57428905	57431463	GNAS-XL	116321	0	0	-0.414875	20	57431303	GNAS;GNAS;GNAS	264710	minus	S
52	20	57463265	57465201	GNAS-A/B	116325	1.44619e-05	0.0055672	-0.185241	20	57463265	GNAS;GNAS;GNAS;GNAS	264719	minus	S
52.1	20	57463265	57465201	GNAS-A/B	116325	6.03037e-08	6.02272e-05	-0.20226	20	57463270	GNAS;GNAS;GNAS;GNAS	264720	minus	S
52.2	20	57463265	57465201	GNAS-A/B	116325	0.000317062	0.0492562	-0.183445	20	57463357	GNAS;GNAS;GNAS;GNAS	264724	minus	S
52.3	20	57463265	57465201	GNAS-A/B	116325	0	0	-0.367666	20	57463397	GNAS;GNAS;GNAS;GNAS	264725	minus	S
52.4	20	57463265	57465201	GNAS-A/B	116325	1.75994e-06	0.00107877	-0.351189	20	57463455	GNAS;GNAS;GNAS;GNAS	264726	minus	S
52.5	20	57463265	57465201	GNAS-A/B	116325	4.66174e-07	0.000352889	-0.393821	20	57463503	GNAS;GNAS;GNAS;GNAS	264727	minus	S
52.6	20	57463265	57465201	GNAS-A/B	116325	7.12763e-13	2.06343e-09	-0.290283	20	57463527	GNAS;GNAS;GNAS;GNAS	264728	minus	S
52.7	20	57463265	57465201	GNAS-A/B	116325	2.42495e-12	6.29687e-09	-0.350719	20	57463530	GNAS;GNAS;GNAS;GNAS	264729	minus	S
52.8	20	57463265	57465201	GNAS-A/B	116325	0	0	-0.384625	20	57463572	GNAS;GNAS;GNAS;GNAS	264730	minus	S
52.9	20	57463265	57465201	GNAS-A/B	116325	0	0	-0.289618	20	57463615	GNAS;GNAS;GNAS;GNAS	264731	minus	S
52.1	20	57463265	57465201	GNAS-A/B	116325	0	0	-0.435002	20	57463653	GNAS;GNAS;GNAS;GNAS	264732	minus	S
52.11	20	57463265	57465201	GNAS-A/B	116325	0	0	-0.469278	20	57463658	GNAS;GNAS;GNAS;GNAS	264733	minus	S
52.12	20	57463265	57465201	GNAS-A/B	116325	0	0	-0.445986	20	57463711	GNAS;GNAS;GNAS;GNAS	264734	minus	S
52.13	20	57463265	57465201	GNAS-A/B	116325	0	0	-0.354216	20	57463713	GNAS;GNAS;GNAS;GNAS	264735	minus	S
52.14	20	57463265	57465201	GNAS-A/B	116325	0	0	-0.429423	20	57463725	GNAS;GNAS;GNAS;GNAS	264736	minus	S
52.15	20	57463265	57465201	GNAS-A/B	116325	0	0	-0.283021	20	57463763	GNAS;GNAS;GNAS;GNAS	264737	minus	S
52.16	20	57463265	57465201	GNAS-A/B	116325	0	0	-0.421522	20	57463767	GNAS;GNAS;GNAS;GNAS	264738	minus	S
52.17	20	57463265	57465201	GNAS-A/B	116325	0	0	-0.333939	20	57463775	GNAS;GNAS;GNAS;GNAS	264739	minus	S
52.18	20	57463265	57465201	GNAS-A/B	116325	0	0	-0.411449	20	57463783	GNAS;GNAS;GNAS;GNAS	264740	minus	S
52.19	20	57463265	57465201	GNAS-A/B	116325	3.77476e-15	1.99669e-11	-0.373614	20	57463787	GNAS;GNAS;GNAS;GNAS	264741	minus	S
52.2	20	57463265	57465201	GNAS-A/B	116325	0	0	-0.442476	20	57463900	GNAS;GNAS;GNAS;GNAS	264742	minus	S
52.21	20	57463265	57465201	GNAS-A/B	116325	0	0	-0.616953	20	57463903	GNAS;GNAS;GNAS;GNAS	264743	minus	S
52.22	20	57463265	57465201	GNAS-A/B	116325	0	0	-0.61849	20	57463906	GNAS;GNAS;GNAS;GNAS	264744	minus	S
52.23	20	57463265	57465201	GNAS-A/B	116325	0	0	-0.413863	20	57463925	GNAS;GNAS;GNAS;GNAS	264745	minus	S
52.24	20	57463265	57465201	GNAS-A/B	116325	1.77636e-15	1.00144e-11	-0.281041	20	57463974	GNAS;GNAS;GNAS;GNAS	264746	minus	S
52.25	20	57463265	57465201	GNAS-A/B	116325	0	0	-0.368302	20	57463984	GNAS;GNAS;GNAS;GNAS	264747	minus	S
52.26	20	57463265	57465201	GNAS-A/B	116325	1.37738e-05	0.00536986	-0.519805	20	57464000	GNAS;GNAS;GNAS;GNAS	264748	minus	S
52.27	20	57463265	57465201	GNAS-A/B	116325	0	0	-0.296187	20	57464002	GNAS;GNAS;GNAS;GNAS	264749	minus	S
52.28	20	57463265	57465201	GNAS-A/B	116325	0	0	-0.399818	20	57464571	GNAS;GNAS;GNAS;GNAS	264750	minus	S
52.29	20	57463265	57465201	GNAS-A/B	116325	1.33227e-15	7.61091e-12	-0.4583	20	57464742	GNAS;GNAS;GNAS;GNAS	264751	minus	S
52.3	20	57463265	57465201	GNAS-A/B	116325	4.44089e-15	2.29244e-11	-0.454729	20	57464970	GNAS;GNAS;GNAS;GNAS;GNAS;GNAS;GNAS	264752	minus	S
52.31	20	57463265	57465201	GNAS-A/B	116325	0	0	-0.575776	20	57464973	GNAS;GNAS;GNAS;GNAS;GNAS;GNAS;GNAS	264753	minus	S
52.32	20	57463265	57465201	GNAS-A/B	116325	2.13556e-05	0.00763767	-0.287889	20	57465123	GNAS;GNAS;GNAS;GNAS;GNAS;GNAS;GNAS	264754	minus	S
52.33	20	57463265	57465201	GNAS-A/B	116325	0	0	-0.386629	20	57465125	GNAS;GNAS;GNAS;GNAS;GNAS;GNAS;GNAS	264755	minus	S
52.34	20	57463265	57465201	GNAS-A/B	116325	1.37366e-11	3.09764e-08	-0.328648	20	57465132	GNAS;GNAS;GNAS;GNAS;GNAS;GNAS;GNAS	264756	minus	S
52.35	20	57463265	57465201	GNAS-A/B	116325	6.66134e-16	4.07727e-12	-0.364717	20	57465139	GNAS;GNAS;GNAS;GNAS;GNAS;GNAS;GNAS	264757	minus	S
52.36	20	57463265	57465201	GNAS-A/B	116325	1.68754e-14	7.45398e-11	-0.421832	20	57465175	GNAS;GNAS;GNAS;GNAS;GNAS;GNAS;GNAS	264758	minus	S
53	21	40757510	40758276	WRB	117074	1.77672e-09	2.61059e-06	-0.193048	21	40757750	WRB	268459	minus	S
53.1	21	40757510	40758276	WRB	117074	4.43599e-09	5.90256e-06	-0.161485	21	40757899	WRB	268460	minus	S
54	22	42077774	42078873	NHP2L1	118683	8.39329e-14	3.12709e-10	-0.244295	22	42078217	NHP2L1;NHP2L1	275645	minus	S
54.1	22	42077774	42078873	NHP2L1	118683	3.61444e-12	9.00366e-09	-0.257543	22	42078330	NHP2L1;NHP2L1	275646	minus	S
54.2	22	42077774	42078873	NHP2L1	118683	1.78612e-10	3.16229e-07	-0.228017	22	42078365	NHP2L1;NHP2L1;NHP2L1	275647	minus	S
54.3	22	42077774	42078873	NHP2L1	118683	5.54965e-07	0.000411381	-0.178089	22	42078388	NHP2L1;NHP2L1;NHP2L1	275648	minus	S
54.4	22	42077774	42078873	NHP2L1	118683	2.44205e-12	6.30307e-09	-0.282194	22	42078567	NHP2L1;NHP2L1	275649	minus	S
54.5	22	42077774	42078873	NHP2L1	118683	7.20971e-08	7.06875e-05	-0.251974	22	42078723	NHP2L1;NHP2L1	275651	minus	S

## Sheet: hypo_MLID BWS3
X	Chr	start	End	Gena_Nam	regionID	Pvalue_M	AdjustedPvalue_M	Betadif	chr	pos	Genename	Index	direction	significance
2	1	68515433	68517545	DIRAS3	4923	2.43504e-05	0.0100652	-0.0738147	1	68515872	DIRAS3	20346	minus	S
2.1	1	68515433	68517545	DIRAS3	4923	1.82708e-08	1.86831e-05	-0.134029	1	68516080	DIRAS3	20348	minus	S
2.2	1	68515433	68517545	DIRAS3	4923	6.09903e-11	9.71438e-08	-0.258145	1	68516101	DIRAS3	20349	minus	S
2.3	1	68515433	68517545	DIRAS3	4923	2.4771e-06	0.00159598	-0.12745	1	68516138	DIRAS3	20350	minus	S
2.4	1	68515433	68517545	DIRAS3	4923	3.41405e-06	0.00207191	-0.144565	1	68516272	DIRAS3;DIRAS3	20351	minus	S
2.5	1	68515433	68517545	DIRAS3	4923	1.3382e-08	1.40875e-05	-0.146591	1	68516279	DIRAS3;DIRAS3	20352	minus	S
2.6	1	68515433	68517545	DIRAS3	4923	1.42042e-09	1.75893e-06	-0.166471	1	68516374	DIRAS3;DIRAS3	20353	minus	S
2.7	1	68515433	68517545	DIRAS3	4923	1.16047e-05	0.00555541	-0.173835	1	68516453	DIRAS3;DIRAS3	20354	minus	S
2.8	1	68515433	68517545	DIRAS3	4923	6.79658e-09	7.48595e-06	-0.263654	1	68516465	DIRAS3	20356	minus	S
2.9	1	68515433	68517545	DIRAS3	4923	1.0024e-11	1.85924e-08	-0.394874	1	68517177	DIRAS3	20360	minus	S
2.1	1	68515433	68517545	DIRAS3	4923	4.75544e-11	7.68867e-08	-0.384952	1	68517205	DIRAS3	20361	minus	S
2.11	1	68515433	68517545	DIRAS3	4923	5.90708e-07	0.000456845	-0.222364	1	68517255	DIRAS3	20362	minus	S
2.12	1	68515433	68517545	DIRAS3	4923	4.34126e-07	0.000343815	-0.378709	1	68517273	DIRAS3	20363	minus	S
3	1	68512505	68513486	DIRAS3_Ex2	4923	5.19584e-11	8.36914e-08	-0.221832	1	68512539	DIRAS3	20335	minus	S
3.1	1	68512505	68513486	DIRAS3_Ex2	4923	1.15707e-12	2.51653e-09	-0.344882	1	68512777	DIRAS3	20337	minus	S
3.2	1	68512505	68513486	DIRAS3_Ex2	4923	2.12957e-09	2.54868e-06	-0.366309	1	68512807	DIRAS3	20338	minus	S
3.3	1	68512505	68513486	DIRAS3_Ex2	4923	7.84661e-12	1.48103e-08	-0.270449	1	68512845	DIRAS3	20339	minus	S
3.4	1	68512505	68513486	DIRAS3_Ex2	4923	1.23418e-09	1.5507e-06	-0.437845	1	68512928	DIRAS3	20340	minus	S
3.5	1	68512505	68513486	DIRAS3_Ex2	4923	9.43381e-11	1.44874e-07	-0.340116	1	68512971	DIRAS3	20341	minus	S
3.6	1	68512505	68513486	DIRAS3_Ex2	4923	1.88109e-10	2.72127e-07	-0.261533	1	68513063	DIRAS3	20342	minus	S
4	2	207066967	207069445	GPR1-AS	20298	0.000122161	0.0334017	-0.0895157	2	207068254	GPR1;GPR1	249868	minus	S
8	6	3849082	3850359	FAM50B	43448	1.83254e-05	0.00803854	-0.324815	6	3849190	FAM50B	342723	minus	S
8.1	6	3849082	3850359	FAM50B	43448	2.74465e-11	4.6851e-08	-0.19399	6	3849235	FAM50B	342724	minus	S
8.2	6	3849082	3850359	FAM50B	43448	2.38248e-09	2.82767e-06	-0.218772	6	3849272	FAM50B	342725	minus	S
8.3	6	3849082	3850359	FAM50B	43448	5.24969e-08	4.95432e-05	-0.157635	6	3849277	FAM50B	342726	minus	S
8.4	6	3849082	3850359	FAM50B	43448	3.42121e-10	4.66827e-07	-0.228226	6	3849294	FAM50B	342727	minus	S
8.5	6	3849082	3850359	FAM50B	43448	2.72821e-08	2.69799e-05	-0.164424	6	3849350	FAM50B	342730	minus	S
8.6	6	3849082	3850359	FAM50B	43448	2.87548e-13	6.92144e-10	-0.23207	6	3849381	FAM50B	342731	minus	S
8.7	6	3849082	3850359	FAM50B	43448	1.91856e-08	1.9433e-05	-0.216502	6	3849391	FAM50B	342732	minus	S
8.8	6	3849082	3850359	FAM50B	43448	3.38396e-13	8.01037e-10	-0.275667	6	3849411	FAM50B	342733	minus	S
8.9	6	3849082	3850359	FAM50B	43448	3.75459e-10	5.10691e-07	-0.230914	6	3849434	FAM50B	342734	minus	S
8.1	6	3849082	3850359	FAM50B	43448	1.60498e-10	2.37125e-07	-0.275987	6	3849442	FAM50B	342735	minus	S
8.11	6	3849082	3850359	FAM50B	43448	3.51457e-11	5.88218e-08	-0.326695	6	3849458	FAM50B	342736	minus	S
8.12	6	3849082	3850359	FAM50B	43448	5.9952e-15	1.96083e-11	-0.318433	6	3849475	FAM50B	342737	minus	S
8.13	6	3849082	3850359	FAM50B	43448	5.28358e-09	5.92613e-06	-0.229354	6	3849536	FAM50B	342738	minus	S
8.14	6	3849082	3850359	FAM50B	43448	4.30839e-10	5.76862e-07	-0.302966	6	3849542	FAM50B	342739	minus	S
8.15	6	3849082	3850359	FAM50B	43448	1.25424e-11	2.27706e-08	-0.384335	6	3849577	FAM50B	342740	minus	S
8.16	6	3849082	3850359	FAM50B	43448	2.72701e-05	0.0110331	-0.131877	6	3849688	FAM50B;FAM50B	342741	minus	S
8.17	6	3849082	3850359	FAM50B	43448	8.25326e-06	0.00431239	-0.170636	6	3849690	FAM50B;FAM50B	342742	minus	S
8.18	6	3849082	3850359	FAM50B	43448	1.18221e-08	1.25378e-05	-0.156887	6	3849702	FAM50B;FAM50B	342743	minus	S
8.19	6	3849082	3850359	FAM50B	43448	2.88054e-10	4.02677e-07	-0.197077	6	3849801	FAM50B	342744	minus	S
8.2	6	3849082	3850359	FAM50B	43448	7.34926e-10	9.57092e-07	-0.177994	6	3849818	FAM50B	342745	minus	S
8.21	6	3849082	3850359	FAM50B	43448	0.000128914	0.0344351	-0.0804315	6	3850106	FAM50B	342746	minus	S
18	9	98075400	98075744	FANCC	64993	1.11022e-15	4.36405e-12	-0.470063	9	98075481	FANCC	422710	minus	S
18.1	9	98075400	98075744	FANCC	64993	7.70783e-10	9.97723e-07	-0.330525	9	98075492	FANCC	422711	minus	S
24	11	2719948	2722259	KCNQ1OT1	73788	2.44249e-15	8.72083e-12	-0.527545	11	2720229	KCNQ1;KCNQ1OT1;KCNQ1	67754	minus	S
24.1	11	2719948	2722259	KCNQ1OT1	73788	4.29203e-10	5.76473e-07	-0.363562	11	2720810	KCNQ1;KCNQ1OT1;KCNQ1	67756	minus	S
24.2	11	2719948	2722259	KCNQ1OT1	73788	3.98792e-13	9.25651e-10	-0.292448	11	2721207	KCNQ1;KCNQ1OT1;KCNQ1	67757	minus	S
24.3	11	2719948	2722259	KCNQ1OT1	73788	1.77636e-15	6.56113e-12	-0.179095	11	2721243	KCNQ1OT1;KCNQ1;KCNQ1	67758	minus	S
24.4	11	2719948	2722259	KCNQ1OT1	73788	1.33227e-15	5.05149e-12	-0.248906	11	2721248	KCNQ1OT1;KCNQ1;KCNQ1	67759	minus	S
24.5	11	2719948	2722259	KCNQ1OT1	73788	4.44089e-16	1.92195e-12	-0.391147	11	2721336	KCNQ1OT1;KCNQ1;KCNQ1	67760	minus	S
24.6	11	2719948	2722259	KCNQ1OT1	73788	1.70752e-13	4.30352e-10	-0.195988	11	2721351	KCNQ1OT1;KCNQ1;KCNQ1	67761	minus	S
24.7	11	2719948	2722259	KCNQ1OT1	73788	0	0	-0.423794	11	2721366	KCNQ1OT1;KCNQ1;KCNQ1	67762	minus	S
24.8	11	2719948	2722259	KCNQ1OT1	73788	0	0	-0.426014	11	2721383	KCNQ1OT1;KCNQ1;KCNQ1	67763	minus	S
24.9	11	2719948	2722259	KCNQ1OT1	73788	5.37548e-12	1.03746e-08	-0.341735	11	2721409	KCNQ1OT1;KCNQ1;KCNQ1	67764	minus	S
24.1	11	2719948	2722259	KCNQ1OT1	73788	5.9952e-14	1.61552e-10	-0.338178	11	2721428	KCNQ1OT1;KCNQ1;KCNQ1	67765	minus	S
24.11	11	2719948	2722259	KCNQ1OT1	73788	0	0	-0.255461	11	2721437	KCNQ1OT1;KCNQ1;KCNQ1	67766	minus	S
24.12	11	2719948	2722259	KCNQ1OT1	73788	2.04281e-14	6.07816e-11	-0.29272	11	2721480	KCNQ1OT1;KCNQ1;KCNQ1	67767	minus	S
24.13	11	2719948	2722259	KCNQ1OT1	73788	0.000112958	0.0316117	-0.233666	11	2721591	KCNQ1OT1;KCNQ1;KCNQ1	67768	minus	S
24.14	11	2719948	2722259	KCNQ1OT1	73788	3.66415e-08	3.53588e-05	-0.181614	11	2721610	KCNQ1OT1;KCNQ1;KCNQ1	67769	minus	S
24.15	11	2719948	2722259	KCNQ1OT1	73788	1.11358e-11	2.04772e-08	-0.174253	11	2721619	KCNQ1OT1;KCNQ1;KCNQ1	67770	minus	S
24.16	11	2719948	2722259	KCNQ1OT1	73788	8.52651e-14	2.28327e-10	-0.299193	11	2721632	KCNQ1OT1;KCNQ1;KCNQ1	67771	minus	S
24.17	11	2719948	2722259	KCNQ1OT1	73788	5.91305e-12	1.13102e-08	-0.314298	11	2721799	KCNQ1OT1;KCNQ1;KCNQ1	67772	minus	S
24.18	11	2719948	2722259	KCNQ1OT1	73788	2.4869e-14	7.29813e-11	-0.344603	11	2721817	KCNQ1OT1;KCNQ1;KCNQ1	67773	minus	S
24.19	11	2719948	2722259	KCNQ1OT1	73788	3.40861e-11	5.72721e-08	-0.303201	11	2721857	KCNQ1OT1;KCNQ1;KCNQ1	67774	minus	S
24.2	11	2719948	2722259	KCNQ1OT1	73788	2.08722e-13	5.11018e-10	-0.24796	11	2721952	KCNQ1OT1;KCNQ1;KCNQ1	67776	minus	S
24.21	11	2719948	2722259	KCNQ1OT1	73788	0	0	-0.265166	11	2721961	KCNQ1OT1;KCNQ1;KCNQ1	67777	minus	S
24.22	11	2719948	2722259	KCNQ1OT1	73788	0	0	-0.402757	11	2722062	KCNQ1OT1;KCNQ1;KCNQ1	67778	minus	S
24.23	11	2719948	2722259	KCNQ1OT1	73788	0	0	-0.367304	11	2722073	KCNQ1OT1;KCNQ1;KCNQ1	67779	minus	S
24.24	11	2719948	2722259	KCNQ1OT1	73788	0	0	-0.403549	11	2722076	KCNQ1OT1;KCNQ1;KCNQ1	67780	minus	S
24.25	11	2719948	2722259	KCNQ1OT1	73788	8.88178e-16	3.52357e-12	-0.476934	11	2722082	KCNQ1OT1;KCNQ1;KCNQ1	67781	minus	S
24.26	11	2719948	2722259	KCNQ1OT1	73788	3.02691e-12	6.11745e-09	-0.420148	11	2722084	KCNQ1OT1;KCNQ1;KCNQ1	67782	minus	S
24.27	11	2719948	2722259	KCNQ1OT1	73788	1.95843e-12	4.05364e-09	-0.42282	11	2722086	KCNQ1OT1;KCNQ1;KCNQ1	67783	minus	S
24.28	11	2719948	2722259	KCNQ1OT1	73788	1.71143e-11	3.00522e-08	-0.301512	11	2722195	KCNQ1OT1;KCNQ1;KCNQ1	67784	minus	S
24.29	11	2719948	2722259	KCNQ1OT1	73788	1.63574e-09	1.99887e-06	-0.422289	11	2722258	KCNQ1OT1;KCNQ1;KCNQ1	67785	minus	S
40	15	99408496	99409650	IGF1R	98726	4.51283e-11	7.32406e-08	-0.565183	15	99408636	IGF1R	151197	minus	S
40.1	15	99408496	99409650	IGF1R	98726	1.13243e-14	3.54157e-11	-0.435226	15	99408804	IGF1R	151198	minus	S
40.2	15	99408496	99409650	IGF1R	98726	7.59282e-12	1.43946e-08	-0.46697	15	99408958	IGF1R	151199	minus	S
40.3	15	99408496	99409650	IGF1R	98726	9.54792e-14	2.54091e-10	-0.368283	15	99409194	IGF1R	151200	minus	S
40.4	15	99408496	99409650	IGF1R	98726	6.68288e-11	1.05269e-07	-0.416553	15	99409360	IGF1R	151201	minus	S
40.5	15	99408496	99409650	IGF1R	98726	0	0	-0.503113	15	99409411	IGF1R	151202	minus	S
40.6	15	99408496	99409650	IGF1R	98726	1.50286e-11	2.64984e-08	-0.422359	15	99409506	IGF1R	151203	minus	S
46	20	30134663	30135933	MCTS2P	115404	1.64828e-10	2.41854e-07	-0.183269	20	30134929	HM13;HM13;HM13;PSIMCT-1	260179	minus	S
46.1	20	30134663	30135933	MCTS2P	115404	1.10116e-11	2.03362e-08	-0.213444	20	30134973	HM13;HM13;HM13;PSIMCT-1	260180	minus	S
46.2	20	30134663	30135933	MCTS2P	115404	5.41789e-14	1.46919e-10	-0.277181	20	30135108	HM13;HM13;HM13;PSIMCT-1	260181	minus	S
46.3	20	30134663	30135933	MCTS2P	115404	1.05116e-12	2.29783e-09	-0.245805	20	30135124	HM13;HM13;HM13;PSIMCT-1	260182	minus	S
46.4	20	30134663	30135933	MCTS2P	115404	2.06339e-10	2.95676e-07	-0.258298	20	30135144	HM13;HM13;HM13;PSIMCT-1	260183	minus	S
46.5	20	30134663	30135933	MCTS2P	115404	4.02503e-10	5.44021e-07	-0.211329	20	30135149	HM13;HM13;HM13;PSIMCT-1	260184	minus	S
46.6	20	30134663	30135933	MCTS2P	115404	9.6209e-06	0.00484957	-0.120725	20	30135158	HM13;HM13;HM13;PSIMCT-1	260185	minus	S
46.7	20	30134663	30135933	MCTS2P	115404	1.44973e-12	3.09027e-09	-0.206581	20	30135177	HM13;HM13;HM13;PSIMCT-1	260186	minus	S
46.8	20	30134663	30135933	MCTS2P	115404	6.90557e-11	1.08378e-07	-0.233944	20	30135291	HM13;HM13;HM13;PSIMCT-1	260187	minus	S
46.9	20	30134663	30135933	MCTS2P	115404	2.1986e-11	3.7984e-08	-0.270119	20	30135362	HM13;HM13;HM13;PSIMCT-1	260188	minus	S
50	20	57425649	57428033	GNAS-AS1	116321	0	0	-0.452452	20	57425979	GNASAS;GNAS	264635	minus	S
50.1	20	57425649	57428033	GNAS-AS1	116321	1.14186e-10	1.73488e-07	-0.345243	20	57425986	GNASAS;GNAS	264636	minus	S
50.2	20	57425649	57428033	GNAS-AS1	116321	4.69086e-09	5.3311e-06	-0.384824	20	57425994	GNASAS;GNAS	264637	minus	S
50.3	20	57425649	57428033	GNAS-AS1	116321	8.88178e-16	3.52357e-12	-0.348338	20	57426131	GNASAS;GNAS	264638	minus	S
50.4	20	57425649	57428033	GNAS-AS1	116321	0	0	-0.305364	20	57426138	GNASAS;GNAS	264639	minus	S
50.5	20	57425649	57428033	GNAS-AS1	116321	1.61204e-13	4.08692e-10	-0.289847	20	57426215	GNAS;GNASAS	264640	minus	S
50.6	20	57425649	57428033	GNAS-AS1	116321	1.41762e-11	2.50987e-08	-0.340134	20	57426240	GNAS;GNASAS	264641	minus	S
50.7	20	57425649	57428033	GNAS-AS1	116321	2.22045e-16	1.06895e-12	-0.302896	20	57426322	GNAS;GNASAS	264644	minus	S
50.8	20	57425649	57428033	GNAS-AS1	116321	8.88178e-16	3.52357e-12	-0.32969	20	57426368	GNAS;GNASAS	264645	minus	S
50.9	20	57425649	57428033	GNAS-AS1	116321	3.3662e-13	8.01037e-10	-0.322982	20	57426374	GNAS;GNASAS	264646	minus	S
50.1	20	57425649	57428033	GNAS-AS1	116321	4.17444e-14	1.14651e-10	-0.281185	20	57426383	GNAS;GNASAS	264647	minus	S
50.11	20	57425649	57428033	GNAS-AS1	116321	7.10543e-15	2.28899e-11	-0.371818	20	57426391	GNAS;GNASAS	264648	minus	S
50.12	20	57425649	57428033	GNAS-AS1	116321	1.64313e-14	4.95781e-11	-0.265759	20	57426395	GNAS;GNASAS	264649	minus	S
50.13	20	57425649	57428033	GNAS-AS1	116321	4.44089e-16	1.92195e-12	-0.352741	20	57426538	GNAS;GNAS;GNAS;GNASAS	264652	minus	S
50.14	20	57425649	57428033	GNAS-AS1	116321	4.6725e-08	4.42912e-05	-0.368656	20	57426545	GNAS;GNAS;GNAS;GNASAS	264653	minus	S
50.15	20	57425649	57428033	GNAS-AS1	116321	1.20284e-10	1.81467e-07	-0.305746	20	57426570	GNAS;GNAS;GNAS;GNASAS	264654	minus	S
50.16	20	57425649	57428033	GNAS-AS1	116321	2.66454e-15	9.28159e-12	-0.249194	20	57426580	GNAS;GNAS;GNAS;GNASAS	264655	minus	S
50.17	20	57425649	57428033	GNAS-AS1	116321	4.08573e-06	0.00243133	-0.327243	20	57426743	GNAS;GNAS;GNAS;GNASAS	264656	minus	S
50.18	20	57425649	57428033	GNAS-AS1	116321	2.54573e-07	0.000212205	-0.384292	20	57426749	GNAS;GNAS;GNAS;GNASAS	264657	minus	S
50.19	20	57425649	57428033	GNAS-AS1	116321	1.42503e-08	1.48918e-05	-0.348186	20	57426757	GNAS;GNAS;GNAS;GNASAS	264658	minus	S
50.2	20	57425649	57428033	GNAS-AS1	116321	1.15463e-14	3.58485e-11	-0.492529	20	57426759	GNAS;GNAS;GNAS;GNASAS	264659	minus	S
50.21	20	57425649	57428033	GNAS-AS1	116321	0	0	-0.307776	20	57426789	GNAS;GNAS;GNAS;GNASAS	264660	minus	S
50.22	20	57425649	57428033	GNAS-AS1	116321	0	0	-0.383058	20	57426801	GNAS;GNAS;GNAS;GNASAS	264661	minus	S
50.23	20	57425649	57428033	GNAS-AS1	116321	4.44089e-16	1.92195e-12	-0.42228	20	57426835	GNAS;GNAS;GNAS;GNASAS	264662	minus	S
50.24	20	57425649	57428033	GNAS-AS1	116321	4.44089e-16	1.92195e-12	-0.402176	20	57426858	GNAS;GNAS;GNAS;GNASAS	264663	minus	S
50.25	20	57425649	57428033	GNAS-AS1	116321	0	0	-0.479267	20	57426931	GNAS;GNAS;GNAS;GNASAS	264664	minus	S
50.26	20	57425649	57428033	GNAS-AS1	116321	0	0	-0.419742	20	57426950	GNAS;GNAS;GNAS;GNASAS	264665	minus	S
50.27	20	57425649	57428033	GNAS-AS1	116321	0	0	-0.404536	20	57426979	GNAS;GNAS;GNAS;GNASAS	264666	minus	S
50.28	20	57425649	57428033	GNAS-AS1	116321	0	0	-0.367407	20	57427010	GNAS;GNAS;GNAS;GNASAS	264667	minus	S
50.29	20	57425649	57428033	GNAS-AS1	116321	0	0	-0.474823	20	57427017	GNAS;GNAS;GNAS;GNASAS	264668	minus	S
50.3	20	57425649	57428033	GNAS-AS1	116321	6.66134e-16	2.85409e-12	-0.353519	20	57427030	GNAS;GNAS;GNAS;GNASAS	264669	minus	S
50.31	20	57425649	57428033	GNAS-AS1	116321	0	0	-0.41096	20	57427046	GNAS;GNAS;GNAS;GNASAS	264670	minus	S
50.32	20	57425649	57428033	GNAS-AS1	116321	3.06422e-14	8.75254e-11	-0.474739	20	57427103	GNAS;GNAS;GNAS;GNASAS	264671	minus	S
50.33	20	57425649	57428033	GNAS-AS1	116321	0	0	-0.29772	20	57427117	GNAS;GNAS;GNAS;GNASAS	264672	minus	S
50.34	20	57425649	57428033	GNAS-AS1	116321	6.92113e-13	1.55257e-09	-0.494241	20	57427170	GNAS;GNAS;GNAS;GNASAS	264674	minus	S
50.35	20	57425649	57428033	GNAS-AS1	116321	6.87708e-09	7.5552e-06	-0.331495	20	57427173	GNAS;GNAS;GNAS;GNASAS	264675	minus	S
50.36	20	57425649	57428033	GNAS-AS1	116321	4.08844e-11	6.73737e-08	-0.341689	20	57427210	GNAS;GNAS;GNAS;GNASAS	264676	minus	S
50.37	20	57425649	57428033	GNAS-AS1	116321	1.16801e-08	1.24179e-05	-0.573455	20	57427237	GNAS;GNAS;GNAS;GNASAS	264677	minus	S
50.38	20	57425649	57428033	GNAS-AS1	116321	6.93989e-10	9.09308e-07	-0.256854	20	57427274	GNAS;GNAS;GNAS;GNASAS	264678	minus	S
50.39	20	57425649	57428033	GNAS-AS1	116321	3.251e-10	4.47881e-07	-0.28726	20	57427412	GNAS;GNAS;GNAS;GNASAS	264679	minus	S
50.4	20	57425649	57428033	GNAS-AS1	116321	9.30317e-08	8.46284e-05	-0.266675	20	57427426	GNAS;GNAS;GNAS;GNASAS	264680	minus	S
50.41	20	57425649	57428033	GNAS-AS1	116321	9.82518e-10	1.24916e-06	-0.306477	20	57427443	GNAS;GNAS;GNAS;GNASAS	264681	minus	S
50.42	20	57425649	57428033	GNAS-AS1	116321	4.85496e-09	5.50301e-06	-0.382998	20	57427472	GNAS;GNAS;GNAS	264682	minus	S
50.43	20	57425649	57428033	GNAS-AS1	116321	2.79177e-12	5.69595e-09	-0.382532	20	57427483	GNAS;GNAS;GNAS	264683	minus	S
50.44	20	57425649	57428033	GNAS-AS1	116321	3.52629e-12	6.93055e-09	-0.33735	20	57427493	GNAS;GNAS;GNAS	264684	minus	S
50.45	20	57425649	57428033	GNAS-AS1	116321	8.10063e-12	1.51562e-08	-0.30322	20	57427495	GNAS;GNAS;GNAS	264685	minus	S
50.46	20	57425649	57428033	GNAS-AS1	116321	3.37508e-13	8.01037e-10	-0.384084	20	57427503	GNAS;GNAS;GNAS	264686	minus	S
50.47	20	57425649	57428033	GNAS-AS1	116321	3.67692e-09	4.24635e-06	-0.375419	20	57427556	GNAS;GNAS;GNAS	264687	minus	S
50.48	20	57425649	57428033	GNAS-AS1	116321	1.37927e-11	2.45211e-08	-0.353709	20	57427713	GNAS;GNAS;GNAS	264690	minus	S
50.49	20	57425649	57428033	GNAS-AS1	116321	2.87845e-11	4.89401e-08	-0.250492	20	57427730	GNAS;GNAS;GNAS	264691	minus	S
50.5	20	57425649	57428033	GNAS-AS1	116321	2.84396e-09	3.32927e-06	-0.255209	20	57427738	GNAS;GNAS;GNAS	264692	minus	S
50.51	20	57425649	57428033	GNAS-AS1	116321	5.60735e-07	0.000437609	-0.201998	20	57427762	GNAS;GNAS;GNAS	264693	minus	S
50.52	20	57425649	57428033	GNAS-AS1	116321	2.28595e-12	4.70879e-09	-0.357909	20	57427821	GNAS;GNAS;GNAS	264694	minus	S
50.53	20	57425649	57428033	GNAS-AS1	116321	9.58248e-10	1.22557e-06	-0.420829	20	57427830	GNAS;GNAS;GNAS	264695	minus	S
50.54	20	57425649	57428033	GNAS-AS1	116321	4.25637e-12	8.2894e-09	-0.405455	20	57427942	GNAS;GNAS;GNAS	264696	minus	S
50.55	20	57425649	57428033	GNAS-AS1	116321	4.91185e-12	9.52267e-09	-0.415858	20	57427973	GNAS;GNAS;GNAS	264697	minus	S
51	20	57428905	57431463	GNAS-XL	116321	0	0	-0.482026	20	57429277	GNAS;GNAS;GNAS	264705	minus	S
51.1	20	57428905	57431463	GNAS-XL	116321	2.22045e-16	1.06895e-12	-0.307314	20	57429858	GNAS;GNAS;GNAS	264706	minus	S
51.2	20	57428905	57431463	GNAS-XL	116321	9.81935e-09	1.06241e-05	-0.211128	20	57430313	GNAS;GNAS;GNAS	264707	minus	S
51.3	20	57428905	57431463	GNAS-XL	116321	0	0	-0.381647	20	57430663	GNAS;GNAS;GNAS	264708	minus	S
51.4	20	57428905	57431463	GNAS-XL	116321	1.28287e-05	0.00606011	-0.296084	20	57431202	GNAS;GNAS;GNAS	264709	minus	S
51.5	20	57428905	57431463	GNAS-XL	116321	0	0	-0.371501	20	57431303	GNAS;GNAS;GNAS	264710	minus	S
52	20	57463265	57465201	GNAS-A/B	116325	4.51852e-06	0.00264479	-0.15165	20	57463270	GNAS;GNAS;GNAS;GNAS	264720	minus	S
52.1	20	57463265	57465201	GNAS-A/B	116325	0	0	-0.336603	20	57463397	GNAS;GNAS;GNAS;GNAS	264725	minus	S
52.2	20	57463265	57465201	GNAS-A/B	116325	6.22468e-06	0.0034502	-0.360519	20	57463503	GNAS;GNAS;GNAS;GNAS	264727	minus	S
52.3	20	57463265	57465201	GNAS-A/B	116325	9.3741e-11	1.44474e-07	-0.247982	20	57463527	GNAS;GNAS;GNAS;GNAS	264728	minus	S
52.4	20	57463265	57465201	GNAS-A/B	116325	2.00862e-09	2.41743e-06	-0.282098	20	57463530	GNAS;GNAS;GNAS;GNAS	264729	minus	S
52.5	20	57463265	57465201	GNAS-A/B	116325	0	0	-0.354341	20	57463572	GNAS;GNAS;GNAS;GNAS	264730	minus	S
52.6	20	57463265	57465201	GNAS-A/B	116325	2.22045e-16	1.06895e-12	-0.239345	20	57463615	GNAS;GNAS;GNAS;GNAS	264731	minus	S
52.7	20	57463265	57465201	GNAS-A/B	116325	0	0	-0.412581	20	57463653	GNAS;GNAS;GNAS;GNAS	264732	minus	S
52.8	20	57463265	57465201	GNAS-A/B	116325	0	0	-0.424235	20	57463658	GNAS;GNAS;GNAS;GNAS	264733	minus	S
52.9	20	57463265	57465201	GNAS-A/B	116325	3.88578e-14	1.08727e-10	-0.343614	20	57463711	GNAS;GNAS;GNAS;GNAS	264734	minus	S
52.1	20	57463265	57465201	GNAS-A/B	116325	0	0	-0.282646	20	57463713	GNAS;GNAS;GNAS;GNAS	264735	minus	S
52.11	20	57463265	57465201	GNAS-A/B	116325	0	0	-0.399281	20	57463725	GNAS;GNAS;GNAS;GNAS	264736	minus	S
52.12	20	57463265	57465201	GNAS-A/B	116325	1.11022e-14	3.49766e-11	-0.216157	20	57463763	GNAS;GNAS;GNAS;GNAS	264737	minus	S
52.13	20	57463265	57465201	GNAS-A/B	116325	4.44089e-16	1.92195e-12	-0.3436	20	57463767	GNAS;GNAS;GNAS;GNAS	264738	minus	S
52.14	20	57463265	57465201	GNAS-A/B	116325	1.33227e-15	5.05149e-12	-0.223868	20	57463775	GNAS;GNAS;GNAS;GNAS	264739	minus	S
52.15	20	57463265	57465201	GNAS-A/B	116325	8.88178e-16	3.52357e-12	-0.370463	20	57463783	GNAS;GNAS;GNAS;GNAS	264740	minus	S
52.16	20	57463265	57465201	GNAS-A/B	116325	6.05982e-12	1.15394e-08	-0.291008	20	57463787	GNAS;GNAS;GNAS;GNAS	264741	minus	S
52.17	20	57463265	57465201	GNAS-A/B	116325	4.17444e-14	1.14651e-10	-0.266786	20	57463900	GNAS;GNAS;GNAS;GNAS	264742	minus	S
52.18	20	57463265	57465201	GNAS-A/B	116325	1.16676e-11	2.13634e-08	-0.360412	20	57463903	GNAS;GNAS;GNAS;GNAS	264743	minus	S
52.19	20	57463265	57465201	GNAS-A/B	116325	4.79616e-14	1.30888e-10	-0.441121	20	57463906	GNAS;GNAS;GNAS;GNAS	264744	minus	S
52.2	20	57463265	57465201	GNAS-A/B	116325	0	0	-0.378943	20	57463925	GNAS;GNAS;GNAS;GNAS	264745	minus	S
52.21	20	57463265	57465201	GNAS-A/B	116325	2.66454e-14	7.76623e-11	-0.264058	20	57463974	GNAS;GNAS;GNAS;GNAS	264746	minus	S
52.22	20	57463265	57465201	GNAS-A/B	116325	4.44089e-16	1.92195e-12	-0.351684	20	57463984	GNAS;GNAS;GNAS;GNAS	264747	minus	S
52.23	20	57463265	57465201	GNAS-A/B	116325	2.28706e-13	5.53618e-10	-0.263993	20	57464002	GNAS;GNAS;GNAS;GNAS	264749	minus	S
52.24	20	57463265	57465201	GNAS-A/B	116325	2.32905e-11	4.00761e-08	-0.29507	20	57464571	GNAS;GNAS;GNAS;GNAS	264750	minus	S
52.25	20	57463265	57465201	GNAS-A/B	116325	1.95377e-12	4.05364e-09	-0.380988	20	57464742	GNAS;GNAS;GNAS;GNAS	264751	minus	S
52.26	20	57463265	57465201	GNAS-A/B	116325	5.49851e-09	6.10329e-06	-0.288522	20	57464970	GNAS;GNAS;GNAS;GNAS;GNAS;GNAS;GNAS	264752	minus	S
52.27	20	57463265	57465201	GNAS-A/B	116325	3.06422e-14	8.75254e-11	-0.40201	20	57464973	GNAS;GNAS;GNAS;GNAS;GNAS;GNAS;GNAS	264753	minus	S
52.28	20	57463265	57465201	GNAS-A/B	116325	1.72751e-13	4.31432e-10	-0.233059	20	57465125	GNAS;GNAS;GNAS;GNAS;GNAS;GNAS;GNAS	264755	minus	S
52.29	20	57463265	57465201	GNAS-A/B	116325	1.12661e-09	1.41972e-06	-0.290721	20	57465132	GNAS;GNAS;GNAS;GNAS;GNAS;GNAS;GNAS	264756	minus	S
52.3	20	57463265	57465201	GNAS-A/B	116325	3.88388e-10	5.26604e-07	-0.269295	20	57465139	GNAS;GNAS;GNAS;GNAS;GNAS;GNAS;GNAS	264757	minus	S
52.31	20	57463265	57465201	GNAS-A/B	116325	1.46305e-12	3.10323e-09	-0.387926	20	57465175	GNAS;GNAS;GNAS;GNAS;GNAS;GNAS;GNAS	264758	minus	S
53	21	40757510	40758276	WRB	117074	4.16249e-08	3.98981e-05	-0.307434	21	40757691	WRB	268458	minus	S
53.1	21	40757510	40758276	WRB	117074	0	0	-0.549889	21	40757750	WRB	268459	minus	S
53.2	21	40757510	40758276	WRB	117074	0	0	-0.433076	21	40757899	WRB	268460	minus	S
53.3	21	40757510	40758276	WRB	117074	8.01668e-10	1.03458e-06	-0.291927	21	40758208	WRB;WRB	268461	minus	S
54	22	42077774	42078873	NHP2L1	118683	0	0	-0.401482	22	42078217	NHP2L1;NHP2L1	275645	minus	S
54.1	22	42077774	42078873	NHP2L1	118683	0	0	-0.417362	22	42078330	NHP2L1;NHP2L1	275646	minus	S
54.2	22	42077774	42078873	NHP2L1	118683	0	0	-0.386289	22	42078365	NHP2L1;NHP2L1;NHP2L1	275647	minus	S
54.3	22	42077774	42078873	NHP2L1	118683	2.22045e-15	8.0624e-12	-0.346142	22	42078388	NHP2L1;NHP2L1;NHP2L1	275648	minus	S
54.4	22	42077774	42078873	NHP2L1	118683	0	0	-0.379374	22	42078567	NHP2L1;NHP2L1	275649	minus	S
54.5	22	42077774	42078873	NHP2L1	118683	3.18575e-10	4.40308e-07	-0.299002	22	42078723	NHP2L1;NHP2L1	275651	minus	S

[truncated: 2 more sheets: hypo_MLID BWS4, hypo_MLID BWS5]
